# Supplementary material for: Metal-free synthesis of β-aminoketones by the reductive hydroamination of ynones
Source: Royal Society of Chemistry journal article supplement (doi:10.1039/d2cc00169a), 2022-01-01

## Supporting Information

# Metal-free Synthesis of $\beta$ -Aminoketones by Reductive Hydroamination of Ynones

Rui Fu, Yu Liu, Tao Wu, Xinyu Zhang, Yang Zhu, Jiangbin Luo, Zhengyu Zhang, Yaojia Jiang\*

Institute of Advanced Synthesis, School of Chemistry and Molecular Engineering, College of Food Science and Light Industry, Nanjing Tech University, Nanjing 211816, China.

Laboratory Breeding Base of Green Pesticide and Agricultural Bioengineering, Key Laboratory of Green Pesticide and Agricultural Bioengineering Ministry of Education, Guizhou University, Huaxi District, Guiyang 550025, China.

[\\*iamyjjiang@njtech.edu.cn](mailto:iamyjjiang@njtech.edu.cn)

## Table of Contents

|                                                                            |     |
|----------------------------------------------------------------------------|-----|
| General methods and optimization of reaction conditions-----               | S2  |
| General procedure for ynones and their spectral data-----                  | S3  |
| General procedure for $\beta$ -aminoketones and their spectral data-----   | S11 |
| General procedure for mechanism studies and their spectral data-----       | S24 |
| General procedures for applications and their spectral data -----          | S26 |
| $^1\text{H}$ and $^{13}\text{C}$ NMR spectra of ynones -----               | S32 |
| $^1\text{H}$ and $^{13}\text{C}$ NMR spectra of $\beta$ -aminoketones----- | S55 |
| $^1\text{H}$ and $^{13}\text{C}$ NMR spectra of mechanism studies-----     | S89 |
| $^1\text{H}$ and $^{13}\text{C}$ NMR spectra for applications -----        | S93 |

## General methods:

All reactions were carried out in flame or oven-dried glassware under nitrogen atmosphere with freshly distilled dry solvents under anhydrous conditions unless otherwise indicated. Flash column chromatography was performed with silica gel (200 - 300 mesh). Chromatograms were visualized by fluorescence quenching with UV light at 254 nm or by staining with base solution of potassium permanganate and molybdate. NMR spectra were recorded at RT on 400 MHz JEOL or BRUKER spectrometers. The residual solvent signals were taken as the reference (0.00 ppm for  $^1\text{H}$  NMR spectra and 77.0 ppm for  $^{13}\text{C}$  NMR spectra in  $\text{CDCl}_3$ ). Chemical shift ( $\delta$ ) is reported in ppm, coupling constants ( $J$ ) are given in Hz. The following abbreviations classify the multiplicity: s = singlet, d = doublet, t = triplet, m = multiplet, dd = doublet of doublet, q = quartet and br = broad signal. HRMS (ESI) spectra were recorded on a Waters Q-Tof premier TM mass spectrometer.

**Table S1.** Optimization of reaction conditions<sup>a</sup>

| Entry     | Reductant <sup>b</sup>           | Solvent    | Yield (%) <sup>c</sup> |
|-----------|----------------------------------|------------|------------------------|
| 1         | $\text{NaBH}_4$                  | THF        | 6                      |
| 2         | $\text{PhSiH}_3$                 | THF        | 0                      |
| 3         | HBpin                            | THF        | 35                     |
| 4         | $\text{BH}_3 \cdot \text{NMe}_3$ | THF        | 0                      |
| 5         | $\text{BH}_3 \cdot \text{THF}$   | THF        | 0                      |
| 6         | HBpin                            | Toluene    | 28                     |
| 7         | HBpin                            | Hexane     | 31                     |
| 8         | HBpin                            | DCE        | 27                     |
| 9         | HBpin                            | MeCN       | 23                     |
| 10        | HBpin                            | MeOH       | 9                      |
| 11        | HBpin <sup>d</sup>               | THF        | 64                     |
| <b>12</b> | <b>HBpin<sup>e</sup></b>         | <b>THF</b> | <b>88</b>              |

<sup>a</sup>Experiments were performed with **1a** (0.20 mmol, 1.0 equiv.), **2a** (0.30 mmol, 1.5 equiv.) and reducing agent in solvent (2.0 mL) at room temperature without inert gas protection. <sup>b</sup>Without other noticed, 1.5 equiv. of reducing agent was used. <sup>c</sup>Isolated yields. <sup>d</sup>2.0 equiv. of HBpin. <sup>e</sup>2.5 equiv. of HBpin. HBpin = pinacolborane; THF = tetrahydrofuran; DCE = 1,2-dichloroethane.

### General procedure for ynones and their spectral data<sup>1</sup>:

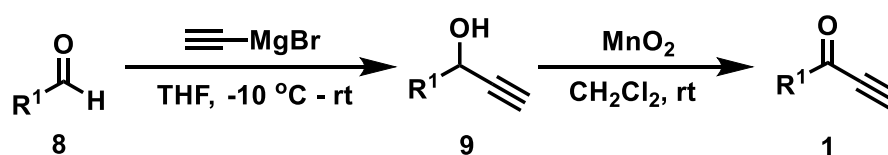

Ethynylmagnesium bromide (0.50 M solution in THF 12 mL, 1.2 equiv.) was added dropwise to a stirred solution of aldehyde **8** (5.0 mmol, 1.0 equiv.) in anhydrous THF (10 mL) at -10 °C. The mixture was kept stirring at -10 °C for 20 minutes and warmed to room temperature for additional two hours. Then the reaction mixture was quenched with saturated ammonium chloride (20 mL) and extracted with ethyl acetate for three times. The organic layers was combined and dried with anhydrous MgSO<sub>4</sub>. It was evaporated under reduced pressure to give intermediate alcohol **9**, which was used in next step directly.

The crude alcohol **9** was dissolved in dichloromethane and treated with activated MnO<sub>2</sub> (10 equiv.). After completion of the reaction (monitored by TLC), the solid was removed by filtration of the reaction mixture through a pad of celite. Then it was extracted with ethyl acetate and dried with anhydrous Na<sub>2</sub>SO<sub>4</sub>. Then the reaction mixture was concentrated under reduced pressure and purified by column chromatography to give the desired ynones **1**.

#### 1-Phenylprop-2-yn-1-one (1a):

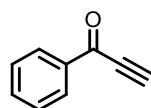

The title compound was prepared according to the general procedure (EA/PE = 1/9, R<sub>f</sub> = 0.38). The product was obtained as yellow solid in 86% yield (559.0 mg), m.p. 44 - 45 °C. <sup>1</sup>H NMR (400 MHz, CDCl<sub>3</sub>) δ 8.18 - 8.16 (m, 2H), 7.66 - 7.62 (m, 1H), 7.52 - 7.49 (m, 2H), 3.50 (s, 1H); <sup>13</sup>C NMR (100 MHz, CDCl<sub>3</sub>) δ 177.4, 136.1, 134.5, 129.7, 128.7, 80.8, 80.2; HRMS (ESI) m/z [M+H]<sup>+</sup>: Calcd for C<sub>9</sub>H<sub>7</sub>O: 131.0497. Found:

<sup>1</sup>J. Rong, H. Li, R. Fu, W. Sun, T.-P. Loh and Y. Jiang, *ACS Catal.*, 2020, **10**, 3664 – 3669.

131.0495.

**1-(*p*-Tolyl)prop-2-yn-1-one (1b):**

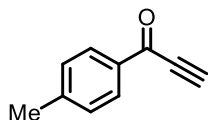

The title compound was prepared according to the general procedure (EA/PE = 1/9,  $R_f$  = 0.54). The product was obtained as yellow solid in 95% yield (684.5 mg), m.p. 35 - 36 °C.  $^1\text{H}$  NMR (400 MHz,  $\text{CDCl}_3$ )  $\delta$  7.97 - 7.95 (m, 2H), 7.21 - 7.19 (m, 2H), 3.34 (s, 1H), 2.34 (s, 3H);  $^{13}\text{C}$  NMR (100 MHz,  $\text{CDCl}_3$ )  $\delta$  177.0, 145.7, 133.8, 129.8, 129.3, 80.4, 80.3, 21.8; HRMS (ESI)  $m/z$   $[\text{M}+\text{H}]^+$ : Calcd for  $\text{C}_{10}\text{H}_9\text{O}$ : 145.0653. Found: 145.0655.

**1-(2,6-Dimethylphenyl)prop-2-yn-1-one (1c):**

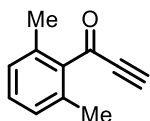

The title compound was prepared according to the general procedure (EA/PE = 1/9,  $R_f$  = 0.5). The product was obtained as brown oil in 82% yield (648.7 mg).  $^1\text{H}$  NMR (400 MHz,  $\text{CDCl}_3$ )  $\delta$  7.23 - 7.20 (m, 1H), 7.05 (d,  $J$  = 7.6 Hz, 2H), 3.50 (s, 1H), 2.37 (s, 6H);  $^{13}\text{C}$  NMR (100 MHz,  $\text{CDCl}_3$ )  $\delta$  184.1, 139.5, 134.9, 130.1, 128.4, 82.7, 81.7, 19.7; HRMS (ESI)  $m/z$   $[\text{M}+\text{H}]^+$ : Calcd for  $\text{C}_{11}\text{H}_{11}\text{O}$ : 159.0810. Found: 159.0805.

**1-(2-Methoxyphenyl)prop-2-yn-1-one (1d):**

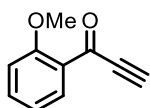

The title compound was prepared according to the general procedure (EA/PE = 1/9,  $R_f$  = 0.58). The product was obtained as faint yellow oil in 91% yield (728.5 mg).  $^1\text{H}$  NMR (400 MHz,  $\text{CDCl}_3$ )  $\delta$  8.07 - 8.05 (m, 1H), 7.57 - 7.53 (m, 1H), 7.06 - 7.00 (m, 2H), 3.93 (s, 3H), 3.39 (s, 1H);  $^{13}\text{C}$  NMR (100 MHz,  $\text{CDCl}_3$ )  $\delta$  176.0, 160.0, 135.5, 133.2, 125.7,

120.2, 112.1, 82.1, 79.3, 55.8; HRMS (ESI)  $m/z$   $[M+H]^+$ : Calcd for  $C_{10}H_9O_2$ : 161.0603. Found: 131.0600.

**1-(4-Methoxyphenyl)prop-2-yn-1-one (1e):**

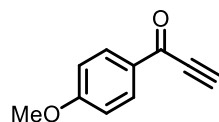

The title compound was prepared according to the general procedure (EA/PE = 1/9,  $R_f$  = 0.45). The product was obtained as yellow solid in 80% yield (640.4 mg), m.p. 72 - 73 °C.  $^1H$  NMR (400 MHz,  $CDCl_3$ )  $\delta$  8.14 - 8.12 (m, 2H), 6.97 - 6.95 (m, 2H), 3.89 (s, 3H), 3.40 (s, 1H);  $^{13}C$  NMR (100 MHz,  $CDCl_3$ )  $\delta$  175.9, 164.7, 132.1, 129.5, 113.9, 80.3, 80.1, 55.6; HRMS (ESI)  $m/z$   $[M+H]^+$ : Calcd for  $C_{10}H_9O_2$ : 161.0603. Found: 161.0600.

**1-(4-Nitrophenyl)prop-2-yn-1-one (1f):**

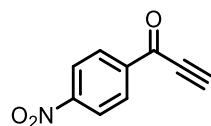

The title compound was prepared according to the general procedure (EA/PE = 1/9,  $R_f$  = 0.55). The product was obtained as yellow solid in 79% yield (691.8 mg), m.p. 76 - 78 °C.  $^1H$  NMR (400 MHz,  $CDCl_3$ )  $\delta$  8.36 - 8.30 (m, 4H), 3.63 - 3.62 (m, 1H);  $^{13}C$  NMR (100 MHz,  $CDCl_3$ )  $\delta$  175.6, 151.2, 140.2, 130.7, 124.0, 83.1, 79.8; HRMS (ESI)  $m/z$   $[M+H]^+$ : Calcd for  $C_9H_6NO_3$ : 176.0348. Found: 176.0355.

**1-(4-(Trifluoromethyl)phenyl)prop-2-yn-1-one (1g):**

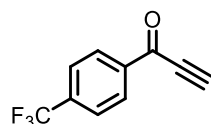

The title compound was prepared according to the general procedure (EA/PE = 1/9,  $R_f$  = 0.68). The product was obtained as yellow solid in 59% yield (584.1 mg), m.p. 65 -

66 °C. <sup>1</sup>H NMR (400 MHz, CDCl<sub>3</sub>) δ 8.28 - 8.26 (m, 2H), 7.78 - 7.76 (m, 2H), 3.57 (s, 1H); <sup>13</sup>C NMR (100 MHz, CDCl<sub>3</sub>) δ 176.2, 138.5, 135.5 (q, *J* = 32.5 Hz), 129.9, 125.7 (q, *J* = 3.7 Hz), 123.4 (q, *J* = 271.4 Hz), 82.1, 79.7; <sup>19</sup>F NMR (376 MHz, CDCl<sub>3</sub>) δ -63.2 (s, 3F); HRMS (ESI) *m/z* [M+H]<sup>+</sup>: Calcd for C<sub>10</sub>H<sub>6</sub>F<sub>3</sub>O: 199.0371. Found: 199.0375.

#### 1-(4-Fluorophenyl)prop-2-yn-1-one (1h):

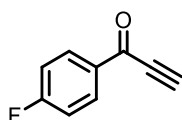

The title compound was prepared according to the general procedure (EA/PE = 1/9, *R<sub>f</sub>* = 0.55). The product was obtained as yellow solid in 70% yield (518.0 mg), m.p. 43 - 44 °C. <sup>1</sup>H NMR (400 MHz, CDCl<sub>3</sub>) δ 8.21 - 8.17 (m, 2H), 7.17 (t, *J* = 8.4 Hz, 2H), 3.50 (s, 1H); <sup>13</sup>C NMR (100 MHz, CDCl<sub>3</sub>) δ 175.7, 166.6 (d, *J* = 256.0 Hz), 132.6 (d, *J* = 2.9 Hz), 132.3 (d, *J* = 9.8 Hz), 115.9 (d, *J* = 22.2 Hz), 81.1, 79.9; <sup>19</sup>F NMR (376 MHz, CDCl<sub>3</sub>) δ -102.2 (s, 1F); HRMS (ESI) *m/z* [M+H]<sup>+</sup>: Calcd for C<sub>9</sub>H<sub>6</sub>FO: 149.0403. Found: 149.0403.

#### 1-(4-Chlorophenyl)prop-2-yn-1-one (1i):

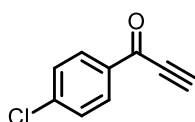

The title compound was prepared according to the general procedure (EA/PE = 1/9, *R<sub>f</sub>* = 0.58). The product was obtained as yellow solid in 75% yield (615.0 mg), m.p. 94 - 95 °C. <sup>1</sup>H NMR (400 MHz, CDCl<sub>3</sub>) δ 8.10 (d, *J* = 8.4 Hz, 2H), 7.48 (d, *J* = 8.4 Hz, 2H), 3.49 (s, 1H); <sup>13</sup>C NMR (100 MHz, CDCl<sub>3</sub>) δ 176.1, 141.2, 134.5, 130.1, 129.1, 81.3, 79.9; HRMS (ESI) *m/z* [M+H]<sup>+</sup>: Calcd for C<sub>9</sub>H<sub>6</sub>ClO: 165.0107. Found: 165.0109.

#### 1-(4-Bromophenyl)prop-2-yn-1-one (1j):

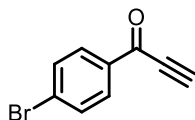

The title compound was prepared according to the general procedure (EA/PE = 1/9,  $R_f$  = 0.73). The product was obtained as yellow solid in 98% yield (1019.2 mg), m.p. 109 - 110 °C.  $^1\text{H}$  NMR (400 MHz,  $\text{CDCl}_3$ )  $\delta$  8.02 (d,  $J$  = 7.6 Hz, 2H), 7.65 (d,  $J$  = 8.0 Hz, 2H), 3.49 (s, 1H);  $^{13}\text{C}$  NMR (100 MHz,  $\text{CDCl}_3$ )  $\delta$  176.3, 134.9, 132.1, 131.0, 130.1, 81.4, 79.9; HRMS (ESI)  $m/z$   $[\text{M}+\text{H}]^+$ : Calcd for  $\text{C}_9\text{H}_6\text{BrO}$ : 208.9602. Found: 208.9607.

#### 1-(2-Bromophenyl)prop-2-yn-1-one (1k):

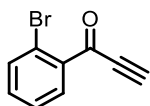

The title compound was prepared according to the general procedure (EA/PE = 1/9,  $R_f$  = 0.60). The product was obtained as faint yellow oil in 93% yield (967.2 mg).  $^1\text{H}$  NMR (400 MHz,  $\text{CDCl}_3$ )  $\delta$  8.12 (d,  $J$  = 7.6 Hz, 1H), 7.69 (d,  $J$  = 7.6 Hz, 1H), 7.48 - 7.38 (m, 2H), 3.54 (s, 1H);  $^{13}\text{C}$  NMR (100 MHz,  $\text{CDCl}_3$ )  $\delta$  176.3, 135.7, 135.1, 133.8, 133.7, 127.3, 121.2, 81.6, 80.7; HRMS (ESI)  $m/z$   $[\text{M}+\text{H}]^+$ : Calcd for  $\text{C}_9\text{H}_6\text{BrO}$ : 208.9602. Found: 208.9597.

#### 1-(4-Iodophenyl)prop-2-yn-1-one (1l):

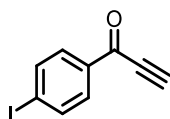

The title compound was prepared according to the general procedure (EA/PE = 1/9,  $R_f$  = 0.68). The product was obtained as yellow solid in 58% yield (742.1 mg), m.p. 117 - 118 °C.  $^1\text{H}$  NMR (400 MHz,  $\text{CDCl}_3$ )  $\delta$  7.93 - 7.82 (m, 4H), 3.48 (s, 1H);  $^{13}\text{C}$  NMR (100 MHz,  $\text{CDCl}_3$ )  $\delta$  176.6, 138.1, 135.4, 130.8, 103.2, 81.4, 79.9; HRMS (ESI)  $m/z$   $[\text{M}+\text{H}]^+$ : Calcd for  $\text{C}_9\text{H}_6\text{IO}$ : 256.9463. Found: 256.6466.

#### 1-(Furan-2-yl)prop-2-yn-1-one (1m):

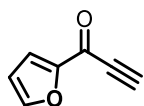

The title compound was prepared according to the general procedure (EA/PE = 1/9,  $R_f$  = 0.40). The product was obtained as yellow solid in 77% yield (462.0 mg), m.p. 44 - 45 °C.  $^1\text{H}$  NMR (400 MHz,  $\text{CDCl}_3$ )  $\delta$  7.63 (s, 1H), 7.35 (m, 1H), 6.54 (m, 1H), 3.29 (s, 1H);  $^{13}\text{C}$  NMR (100 MHz,  $\text{CDCl}_3$ )  $\delta$  163.7, 152.6, 148.5, 122.1, 112.8, 79.5, 79.5; HRMS (ESI)  $m/z$   $[\text{M}+\text{H}]^+$ : Calcd for  $\text{C}_7\text{H}_5\text{O}_2$ : 121.0290. Found: 121.0287.

#### 1-(Thiophen-2-yl)prop-2-yn-1-one (1n):

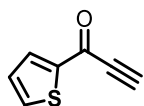

The title compound was prepared according to the general procedure (EA/PE = 1/9,  $R_f$  = 0.40). The product was obtained as yellow solid in 84% yield (571.2 mg), m.p. 39 - 40 °C.  $^1\text{H}$  NMR (400 MHz,  $\text{CDCl}_3$ )  $\delta$  7.99 (d,  $J$  = 3.2 Hz, 1H), 7.77 (d,  $J$  = 4.8 Hz, 1H), 7.20 - 7.18 (m, 1H), 3.40 (s, 1H);  $^{13}\text{C}$  NMR (100 MHz,  $\text{CDCl}_3$ )  $\delta$  169.1, 144.0, 136.2, 136.0, 128.4, 79.8, 79.4; HRMS (ESI)  $m/z$   $[\text{M}+\text{H}]^+$ : Calcd for  $\text{C}_7\text{H}_5\text{OS}$ : 137.0061. Found: 137.0065.

#### 1-(Naphthalen-2-yl)prop-2-yn-1-one (1o):

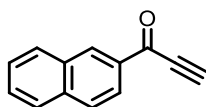

The title compound was prepared according to the general procedure (EA/PE = 1/9,  $R_f$  = 0.63). The product was obtained as yellow solid in 90% yield (810.5 mg), m.p. 91 - 92 °C.  $^1\text{H}$  NMR (400 MHz,  $\text{CDCl}_3$ )  $\delta$  8.73 (s, 1H), 8.13 - 8.11 (m, 1H), 8.00 - 7.98 (m, 1H), 7.89 - 7.86 (m, 2H), 7.65 - 7.59 (m, 1H), 7.57 - 7.55 (m, 1H), 3.51 (s, 1H);  $^{13}\text{C}$  NMR (100 MHz,  $\text{CDCl}_3$ )  $\delta$  177.3, 136.2, 133.6, 133.3, 132.3, 129.8, 129.2, 128.6, 127.9, 127.0, 123.5, 80.7, 80.3; HRMS (ESI)  $m/z$   $[\text{M}+\text{H}]^+$ : Calcd for  $\text{C}_{13}\text{H}_9\text{O}$ : 181.0653. Found: 181.0655.

#### (*E*)-2-Methyl-1-phenylpent-1-en-4-yn-3-one (1p):



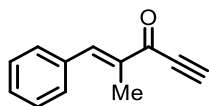

The title compound was prepared according to the general procedure (EA/PE = 1/9,  $R_f$  = 0.69). The product was obtained as yellow solid in 61% yield (518.8 mg), m.p. 43 - 44 °C.  $^1\text{H}$  NMR (400 MHz,  $\text{CDCl}_3$ )  $\delta$  7.97 (s, 1H), 7.43 - 7.30 (m, 5H), 3.27 (s, 1H), 2.04 (s, 3H);  $^{13}\text{C}$  NMR (100 MHz,  $\text{CDCl}_3$ )  $\delta$  180.0, 146.6, 137.6, 135.2, 130.1, 129.4, 128.6, 80.0, 79.7, 12.0; HRMS (ESI)  $m/z$   $[\text{M}+\text{H}]^+$ : Calcd for  $\text{C}_{12}\text{H}_{11}\text{O}$ : 171.0810. Found: 171.0811.

**(E)-1-Phenylpent-1-en-4-yn-3-one (1q):**

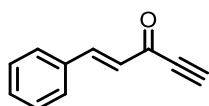

The title compound was prepared according to the general procedure (EA/PE = 1/9,  $R_f$  = 0.55). The product was obtained as brown solid in 61% yield (475.6 mg). m.p. 55 - 57 °C.  $^1\text{H}$  NMR (400 MHz,  $\text{CDCl}_3$ )  $\delta$  7.88 (d,  $J$  = 16.2 Hz, 1H), 7.58 - 7.56 (m, 2H), 7.47 - 7.40 (m, 3H), 6.79 (d,  $J$  = 16.1 Hz, 1H), 3.35 (d,  $J$  = 1.2 Hz, 1H);  $^{13}\text{C}$  NMR (100 MHz,  $\text{CDCl}_3$ )  $\delta$  177.8, 150.0, 133.9, 131.6, 129.3, 128.9, 128.1, 80.0, 79.6; HRMS (ESI)  $m/z$   $[\text{M}+\text{H}]^+$ : Calcd for  $\text{C}_{11}\text{H}_9\text{O}$ : 157.0653. Found: 157.0652.

**(E)-4-Methylhept-4-en-1-yn-3-one (1r):**

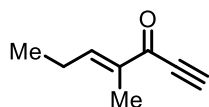

The title compound was prepared according to the general procedure (EA/PE = 1/9,  $R_f$  = 0.80). The product was obtained as yellow oil in 70% yield (427.4 mg).  $^1\text{H}$  NMR (400 MHz,  $\text{CDCl}_3$ )  $\delta$  7.18 (t,  $J$  = 7.2 Hz, 1H), 3.24 (s, 1H), 2.38 - 2.30 (m, 2H), 1.80 (s, 3H), 1.13 (t,  $J$  = 7.6 Hz, 3H);  $^{13}\text{C}$  NMR (100 MHz,  $\text{CDCl}_3$ )  $\delta$  179.6, 153.1, 137.5, 79.6, 79.0, 22.7, 12.7, 10.1; HRMS (ESI)  $m/z$   $[\text{M}+\text{H}]^+$ : Calcd for  $\text{C}_8\text{H}_{11}\text{O}$ : 123.0810. Found: 123.0811.

**Hept-1-yn-3-one (1s):**

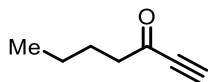

The title compound was prepared according to the general procedure (EA/PE = 1/39,  $R_f$  = 0.55). The product was obtained as colorless oil in 35% yield (192.7 mg).  $^1\text{H}$  NMR (400 MHz,  $\text{CDCl}_3$ )  $\delta$  3.19 (s, 1H), 2.52 (t,  $J$  = 7.2 Hz, 2H), 1.63 - 1.55 (m, 2H), 1.33 - 1.24 (m, 2H), 0.85 (t,  $J$  = 7.6 Hz, 3H);  $^{13}\text{C}$  NMR (100 MHz,  $\text{CDCl}_3$ )  $\delta$  187.5, 81.3, 78.3, 45.0, 25.7, 21.9, 13.6; HRMS (ESI)  $m/z$   $[\text{M}+\text{H}]^+$ : Calcd for  $\text{C}_7\text{H}_{11}\text{O}$ : 111.0810. Found: 111.0814.

### 1-Cyclohexylprop-2-yn-1-one (1t):

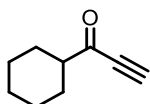

The title compound was prepared according to the general procedure (EA/PE = 1/9,  $R_f$  = 0.80). The product was obtained as brown oil in 47% yield (320.1 mg).  $^1\text{H}$  NMR (400 MHz,  $\text{CDCl}_3$ )  $\delta$  3.86 (d,  $J$  = 6.5 Hz, 1H), 1.93 - 1.87 (m, 1H), 1.77 - 1.70 (m, 4H), 1.47 - 1.38 (m, 1H), 1.33 - 1.13 (m, 4H), 1.00 - 0.91 (m, 1H);  $^{13}\text{C}$  NMR (100 MHz,  $\text{CDCl}_3$ )  $\delta$  176.4, 69.4, 43.5, 37.5, 29.8, 29.2, 26.5, 25.9, 25.8, 25.6; HRMS (ESI)  $m/z$   $[\text{M}+\text{H}]^+$ : Calcd for  $\text{C}_9\text{H}_{13}\text{O}$ : 137.0966. Found: 137.0959.

### 1-((3r,5r,7r)-Adamantan-1-yl)prop-2-yn-1-one (1u):

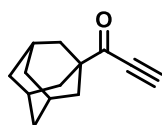

The title compound was prepared according to the general procedure (EA/PE = 1/9,  $R_f$  = 0.75). The product was obtained as yellow solid in 55% yield (517.8 mg). m.p. 89 - 91 °C.  $^1\text{H}$  NMR (400 MHz,  $\text{CDCl}_3$ )  $\delta$  3.22 (s, 1H), 2.07 (s, 3H), 1.86 (d,  $J$  = 2.5 Hz, 6H), 1.77 - 1.70 (m, 6H);  $^{13}\text{C}$  NMR (100 MHz,  $\text{CDCl}_3$ )  $\delta$  193.3, 80.0, 46.9, 37.8, 36.5, 27.8; HRMS (ESI)  $m/z$   $[\text{M}+\text{H}]^+$ : Calcd for  $\text{C}_{13}\text{H}_{19}\text{O}$ : 189.1279. Found: 189.1285.

## General procedure for $\beta$ -aminoketones and their spectral data:

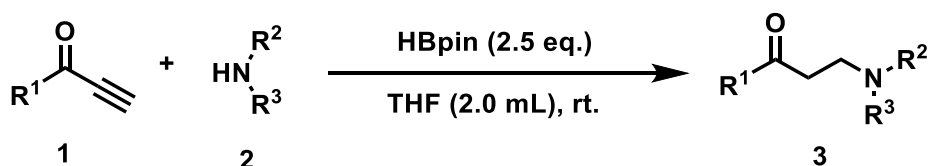

Method A: A tube was charged with **1** (0.20 mmol, 1.0 equiv.), **2** (0.30 mmol, 1.5 equiv.) and HBpin (0.50 mmol, 76.8 mg, 2.5 equiv.) under open-flask in THF (2.0 mL). The resulting mixture was stirred at room temperature until the **1** was consumed completely (about 4.0 hours). After completion of the reaction (monitored by TLC), the reaction solution was concentrated under reduced pressure and purified by column chromatography (dichloromethane: methanol = 9: 1) to give the desired product **3**.

Method B: A tube was charged with **1** (0.20 mmol, 1.0 equiv.), **2** (0.30 mmol, 1.5 equiv.) under open-flask in THF (2.0 mL). The resulting mixture was stirred at room temperature until the **1** was consumed completely (about 5.0 hours). And then HBpin (0.50 mmol, 76.8 mg, 2.5 equiv.) was added directly in one portion and reacted for about 10 minutes. After completion of the reaction (monitored by TLC), the reaction solution was concentrated under reduced pressure and purified by column chromatography (dichloromethane: methanol = 9: 1) to give the desired product **3**.

### 3-(Dimethylamino)-1-phenylpropan-1-one (3aa):

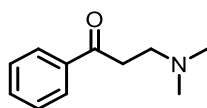

The title compound was prepared according to the general procedure Method A (MeOH/DCM = 1/9,  $R_f$  = 0.25). The product was obtained as yellow solid in 88% yield (31.2 mg), m.p. 31 - 33 °C.  $^1\text{H}$  NMR (400 MHz,  $\text{CDCl}_3$ )  $\delta$  7.98 – 7.94 (m, 2H), 7.59 – 7.55 (m, 1H), 7.48 – 7.44 (m, 2H), 3.31 (t,  $J$  = 7.3 Hz, 2H), 2.97 (t,  $J$  = 7.2 Hz, 2H), 2.44 (s, 6H);  $^{13}\text{C}$  NMR (100 MHz,  $\text{CDCl}_3$ )  $\delta$  198.3, 136.6, 128.8, 128.2, 53.9, 45.0, 36.1; HRMS (ESI)  $m/z$   $[\text{M}+\text{H}]^+$ : Calcd for  $\text{C}_{11}\text{H}_{16}\text{NO}$ : 178.1232. Found: 178.1233

### 3-(Dimethylamino)-1-(p-tolyl)propan-1-one (3ba):

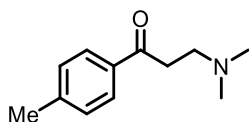

The title compound was prepared according to the general procedure Method A (MeOH/DCM = 1/9,  $R_f$  = 0.30). The product was obtained as brown oil in 88% yield (33.7 mg).  $^1\text{H}$  NMR (400 MHz,  $\text{CDCl}_3$ )  $\delta$  7.88 – 7.84 (m, 2H), 7.27 – 7.24 (m, 2H), 3.25 – 3.19 (m, 2H), 2.90 – 2.84 (m, 2H), 2.40 (d,  $J$  = 6.3 Hz, 3H), 2.38 (d,  $J$  = 6.7 Hz, 6H);  $^{13}\text{C}$  NMR (100 MHz,  $\text{CDCl}_3$ )  $\delta$  198.3, 144.3, 134.3, 129.5, 128.3, 54.3, 45.3, 36.4, 21.8; HRMS (ESI)  $m/z$   $[\text{M}+\text{H}]^+$ : Calcd for  $\text{C}_{12}\text{H}_{18}\text{NO}$ : 192.1388. Found: 192.1386.

### 3-(Dimethylamino)-1-(2,6-dimethylphenyl)propan-1-one (3ca):

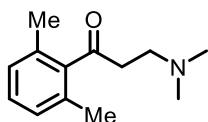

The title compound was prepared according to the general procedure Method A (MeOH/DCM = 1/9,  $R_f$  = 0.25). The product was obtained as brown oil in 85% yield (34.9 mg).  $^1\text{H}$  NMR (400 MHz,  $\text{CDCl}_3$ )  $\delta$  7.17 – 7.13 (m, 1H), 7.01 – 6.99 (m, 2H), 2.97 – 2.93 (m, 2H), 2.82 – 2.78 (m, 2H), 2.31 (s, 6H), 2.22 (s, 6H);  $^{13}\text{C}$  NMR (100 MHz,  $\text{CDCl}_3$ )  $\delta$  209.2, 142.1, 132.6, 128.8, 127.9, 53.5, 45.4, 42.7, 19.3; HRMS (ESI)  $m/z$   $[\text{M}+\text{H}]^+$ : Calcd for  $\text{C}_{13}\text{H}_{20}\text{NO}$ : 206.1545. Found: 206.1548.

### 3-(Dimethylamino)-1-(2-methoxyphenyl)propan-1-one (3da):

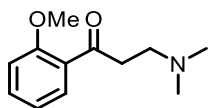

The title compound was prepared according to the general procedure Method A (MeOH/DCM = 1/9,  $R_f$  = 0.20). The product was obtained as yellow oil in 74% yield (30.7 mg).  $^1\text{H}$  NMR (400 MHz,  $\text{CDCl}_3$ )  $\delta$  7.60 – 7.58 (m, 1H), 7.38 – 7.33 (m, 1H), 6.91 – 6.86 (m, 2H), 3.80 (s, 3H), 3.11 – 3.07 (m, 2H), 2.64 – 2.60 (m, 2H), 2.18 (s, 6H);  $^{13}\text{C}$  NMR (100 MHz,  $\text{CDCl}_3$ )  $\delta$  201.4, 158.5, 133.5, 130.3, 128.3, 120.7, 111.6, 55.5, 54.5, 45.5, 42.1; HRMS (ESI)  $m/z$   $[\text{M}+\text{H}]^+$ : Calcd for  $\text{C}_{12}\text{H}_{18}\text{NO}_2$ : 208.1338.

Found: 208.1342.

**3-(Dimethylamino)-1-(4-methoxyphenyl)propan-1-one (3ea):**

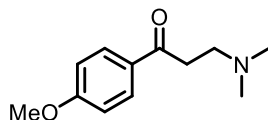

The title compound was prepared according to the general procedure Method A (MeOH/DCM = 1/9,  $R_f$  = 0.20). The product was obtained as yellow solid in 78% yield (32.3 mg), m.p. 180 - 181 °C.  $^1\text{H}$  NMR (400 MHz,  $\text{CDCl}_3$ )  $\delta$  7.95 – 7.92 (m, 2H), 6.93 – 6.90 (m, 2H), 3.85 (s, 3H), 3.17 – 3.14 (m, 2H), 2.84 – 2.80 (m, 2H), 2.34 (s, 6H);  $^{13}\text{C}$  NMR (100 MHz,  $\text{CDCl}_3$ )  $\delta$  197.4, 163.7, 130.5, 129.9, 113.9, 55.6, 54.4, 45.3, 36.2; HRMS (ESI)  $m/z$   $[\text{M}+\text{H}]^+$ : Calcd for  $\text{C}_{12}\text{H}_{18}\text{NO}_2$ : 208.1338. Found: 208.1334.

**3-(Dimethylamino)-1-(4-nitrophenyl)propan-1-one (3fa):**

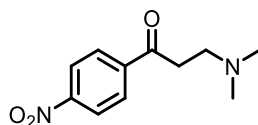

The title compound was prepared according to the general procedure Method A (MeOH/DCM = 1/9,  $R_f$  = 0.25). The product was obtained as brown solid in 86% yield (38.2 mg), m.p. 190 - 191 °C.  $^1\text{H}$  NMR (400 MHz,  $\text{CDCl}_3$ )  $\delta$  8.32 – 8.29 (m, 2H), 8.12 – 8.09 (m, 2H), 3.20 (t,  $J$  = 7.2 Hz, 2H), 2.77 (t,  $J$  = 7.2 Hz, 2H), 2.28 (s, 6H);  $^{13}\text{C}$  NMR (100 MHz,  $\text{CDCl}_3$ )  $\delta$  197.7, 150.4, 141.4, 129.2, 124.0, 54.0, 45.6, 37.5; HRMS (ESI)  $m/z$   $[\text{M}+\text{H}]^+$ : Calcd for  $\text{C}_{11}\text{H}_{15}\text{N}_2\text{O}_3$ : 223.1083. Found: 223.1076.

**3-(Dimethylamino)-1-(4-(trifluoromethyl)phenyl)propan-1-one (3ga):**

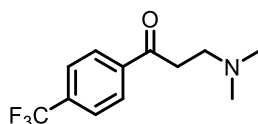

The title compound was prepared according to the general procedure Method A (MeOH/DCM = 1/9,  $R_f$  = 0.35). The product was obtained as brown oil in 72 % yield

(35.3 mg), m.p. 69 - 70 °C. <sup>1</sup>H NMR (400 MHz, CDCl<sub>3</sub>) δ 8.02 – 8.00 (m, 2H), 7.68 – 7.66 (m, 2H), 3.13 (t, *J* = 7.2 Hz, 2H), 2.72 (t, *J* = 7.2 Hz, 2H), 2.24 (s, 6H); <sup>13</sup>C NMR (100 MHz, CDCl<sub>3</sub>) δ 198.1, 139.6, 134.4 (q, *J* = 32.4 Hz), 129.0, 128.4, 127.7, 125.8 (d, *J* = 3.5 Hz), 125.0, 122.3, 54.1, 45.5, 37.3.; <sup>19</sup>F NMR (376 MHz, CDCl<sub>3</sub>) δ -63.06 (s, 3F); HRMS (ESI) *m/z* [M+H]<sup>+</sup>: Calcd for C<sub>12</sub>H<sub>15</sub>F<sub>3</sub>NO: 246.1106. Found: 246.1113.

### 3-(Dimethylamino)-1-(4-fluorophenyl)propan-1-one (3ha):

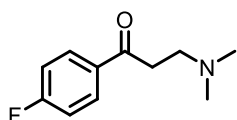

The title compound was prepared according to the general procedure Method A (MeOH/DCM = 1/9, *R<sub>f</sub>* = 0.40). The product was obtained as yellow oil in 88% yield (34.4 mg). <sup>1</sup>H NMR (400 MHz, CDCl<sub>3</sub>) δ 7.91 – 7.86 (m, 2H), 7.04 – 6.98 (m, 2H), 3.05 – 3.01 (m, 2H), 2.65 (t, *J* = 7.3 Hz, 2H), 2.18 (s, 6H); <sup>13</sup>C NMR (100 MHz, CDCl<sub>3</sub>) δ 197.4, 167.0, 164.5, 133.4, 130.7 (d, *J* = 9.2 Hz), 115.7 (d, *J* = 22.0 Hz), 54.3, 45.5, 36.8; <sup>19</sup>F NMR (376 MHz, CDCl<sub>3</sub>) δ -105.24 (s, 1F); HRMS (ESI) *m/z* [M+H]<sup>+</sup>: Calcd for C<sub>11</sub>H<sub>15</sub>FNO: 196.1138. Found: 196.1143.

### 1-(4-Chlorophenyl)-3-(dimethylamino)propan-1-one (3ia):

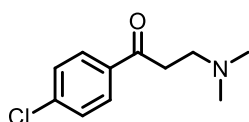

The title compound was prepared according to the general procedure Method A (MeOH/DCM = 1/9, *R<sub>f</sub>* = 0.30). The product was obtained as yellow solid in 82% yield (34.7 mg), m.p. 69 - 72 °C. <sup>1</sup>H NMR (400 MHz, CDCl<sub>3</sub>) δ 7.92 – 7.88 (m, 2H), 7.45 – 7.41 (m, 2H), 3.12 (t, *J* = 7.3 Hz, 2H), 2.74 (t, *J* = 7.3 Hz, 2H), 2.28 (s, 6H); <sup>13</sup>C NMR (100 MHz, CDCl<sub>3</sub>) δ 197.8, 139.4, 135.1, 129.4, 128.8, 54.1, 45.4, 36.8; HRMS (ESI) *m/z* [M+H]<sup>+</sup>: Calcd for C<sub>11</sub>H<sub>15</sub>ClNO: 212.0842. Found: 212.0848.

### 1-(4-Bromophenyl)-3-(dimethylamino)propan-1-one (3ja):

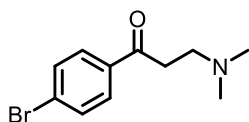

The title compound was prepared according to the general procedure Method A (MeOH/DCM = 1/9,  $R_f$  = 0.30). The product was obtained as yellow solid in 84% yield (43.0 mg), m.p. 58 - 60 °C.  $^1\text{H}$  NMR (400 MHz,  $\text{CDCl}_3$ )  $\delta$  7.82 – 7.79 (m, 2H), 7.60 – 7.57 (m, 2H), 3.14 – 3.10 (m, 2H), 2.75 (t,  $J$  = 7.3 Hz, 2H), 2.28 (s, 6H);  $^{13}\text{C}$  NMR (100 MHz,  $\text{CDCl}_3$ )  $\delta$  198.1, 135.6, 132.1, 129.7, 128.4, 54.3, 45.6, 36.9; HRMS (ESI)  $m/z$   $[\text{M}+\text{H}]^+$ : Calcd for  $\text{C}_{11}\text{H}_{15}\text{BrNO}$ : 256.0337. Found: 256.0340.

### 1-(2-Bromophenyl)-3-(dimethylamino)propan-1-one (3ka):

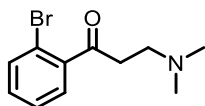

The title compound was prepared according to the general procedure Method A (MeOH/DCM = 1/9,  $R_f$  = 0.25). The product was obtained as brown oil in 87% yield (44.6 mg).  $^1\text{H}$  NMR (400 MHz,  $\text{CDCl}_3$ )  $\delta$  7.59 – 7.55 (m, 1H), 7.40 – 7.37 (m, 1H), 7.36 – 7.32 (m, 1H), 7.29 – 7.24 (m, 1H), 3.10 (t,  $J$  = 7.3 Hz, 2H), 2.72 (t,  $J$  = 7.3 Hz, 2H), 2.25 (s, 6H);  $^{13}\text{C}$  NMR (100 MHz,  $\text{CDCl}_3$ )  $\delta$  203.3, 141.7, 133.7, 131.7, 128.7, 128.9, 127.6, 118.7, 54.1, 45.4, 41.0; HRMS (ESI)  $m/z$   $[\text{M}+\text{H}]^+$ : Calcd for  $\text{C}_{11}\text{H}_{15}\text{BrNO}$ : 256.0337. Found: 256.0343.

### 3-(Dimethylamino)-1-(4-iodophenyl)propan-1-one (3la):

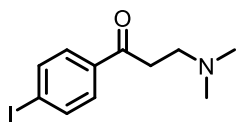

The title compound was prepared according to the general procedure Method A (MeOH/DCM = 1/9,  $R_f$  = 0.35). The product was obtained as yellow solid in 85% yield (51.5 mg), m.p. 82 - 85 °C.  $^1\text{H}$  NMR (400 MHz,  $\text{CDCl}_3$ )  $\delta$  7.82 – 7.79 (m, 2H), 7.67 – 7.64 (m, 2H), 3.12 (t,  $J$  = 7.3 Hz, 2H), 2.76 (t,  $J$  = 7.3 Hz, 2H), 2.29 (s, 6H);  $^{13}\text{C}$  NMR (100 MHz,  $\text{CDCl}_3$ )  $\delta$  198.3, 138.1, 136.1, 129.6, 101.3, 54.2, 45.5, 36.8; HRMS (ESI)

m/z [M+H]<sup>+</sup>: Calcd for C<sub>11</sub>H<sub>15</sub>INO: 304.0198. Found: 304.0204.

**3-(Dimethylamino)-1-(furan-2-yl)propan-1-one (3ma):**

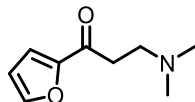

The title compound was prepared according to the general procedure Method A (MeOH/DCM = 1/9, R<sub>f</sub> = 0.40). The product was obtained as yellow solid in 80% yield (26.8 mg), m.p. 95 - 96 °C <sup>1</sup>H NMR (400 MHz, CDCl<sub>3</sub>) δ 7.58 – 7.53 (m, 1H), 7.18 – 7.17 (m, 1H), 6.51 – 6.50 (m, 1H), 2.97 (t, *J* = 7.4 Hz, 2H), 2.71 (t, *J* = 7.3 Hz, 2H), 2.24 (s, 6H); <sup>13</sup>C NMR (100 MHz, CDCl<sub>3</sub>) δ 188.3, 152.8, 146.5, 117.2, 112.4, 54.3, 45.4, 36.8; HRMS (ESI) m/z [M+H]<sup>+</sup>: Calcd for C<sub>9</sub>H<sub>14</sub>NO<sub>2</sub>: 168.1025. Found: 168.1023.

**3-(Dimethylamino)-1-(thiophen-2-yl)propan-1-one (3na):**

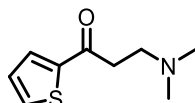

The title compound was prepared according to the general procedure Method A (MeOH/DCM = 1/9, R<sub>f</sub> = 0.40). The product was obtained as brown solid in 86% yield (31.5 mg), m.p. 178 - 180 °C <sup>1</sup>H NMR (400 MHz, CDCl<sub>3</sub>) δ 7.68 – 7.67 (m, 1H), 7.58 – 7.57 (m, 1H), 7.07 (dd, *J*<sub>1</sub> = 4.9, *J*<sub>2</sub> = 3.8 Hz, 1H), 3.03 (t, *J* = 7.3 Hz, 2H), 2.71 (t, *J* = 7.3 Hz, 2H), 2.23 (s, 6H); <sup>13</sup>C NMR (100 MHz, CDCl<sub>3</sub>) δ 192.0, 144.3, 133.9, 132.1, 128.3, 54.5, 45.5, 37.6; HRMS (ESI) m/z [M+H]<sup>+</sup>: Calcd for C<sub>9</sub>H<sub>14</sub>NOS: 184.0796. Found: 184.0788.

**3-(Dimethylamino)-1-(naphthalen-2-yl)propan-1-one (3oa):**

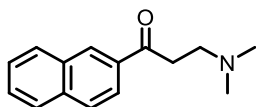

The title compound was prepared according to the general procedure Method A (MeOH/DCM = 1/9, R<sub>f</sub> = 0.30). The product was obtained as yellow oil in 70% yield



(31.8 mg).  $^1\text{H}$  NMR (400 MHz,  $\text{CDCl}_3$ )  $\delta$  8.49 (s, 1H), 8.05 – 8.02 (m, 1H), 7.98 – 7.96 (m, 1H), 7.90 – 7.86 (m, 2H), 7.63 – 7.53 (m, 2H), 3.35 – 3.31 (m, 2H), 2.87 (t,  $J = 7.3$  Hz, 2H), 2.36 (s, 6H);  $^{13}\text{C}$  NMR (100 MHz,  $\text{CDCl}_3$ )  $\delta$  199.0, 135.7, 134.2, 132.6, 129.9, 128.7, 127.9, 126.9, 123.9, 54.5, 45.5, 36.9; HRMS (ESI)  $m/z$   $[\text{M}+\text{H}]^+$ : Calcd for  $\text{C}_{15}\text{H}_{18}\text{NO}$ : 228.1388. Found: 228.1397.

**(E)-5-(Dimethylamino)-2-methyl-1-phenylpent-1-en-3-one (3pa):**

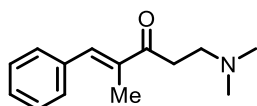

The title compound was prepared according to the general procedure Method A (MeOH/DCM = 1/9,  $R_f = 0.20$ ). The product was obtained as yellow solid in 85% yield (36.9 mg), m.p. 62 - 65 °C  $^1\text{H}$  NMR (400 MHz,  $\text{CDCl}_3$ )  $\delta$  7.56 – 7.53 (m, 1H), 7.43 – 7.38 (m, 4H), 7.35 – 7.31 (m, 1H), 3.04 (t,  $J = 7.4$  Hz, 2H), 2.76 – 2.73 (m, 2H), 2.32 (s, 6H), 2.05 (d,  $J = 1.3$  Hz, 3H);  $^{13}\text{C}$  NMR (100 MHz,  $\text{CDCl}_3$ )  $\delta$  201.0, 139.1, 137.4, 135.9, 129.9, 128.6, 54.9, 45.5, 35.8, 13.3; HRMS (ESI)  $m/z$   $[\text{M}+\text{H}]^+$ : Calcd for  $\text{C}_{14}\text{H}_{20}\text{NO}$ : 218.1545. Found: 218.1545.

**(E)-5-(Dimethylamino)-1-phenylpent-1-en-3-one (3qa):**

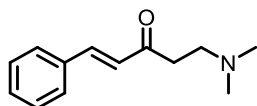

The title compound was prepared according to the general procedure Method A (MeOH/DCM = 1/9,  $R_f = 0.30$ ). The product was obtained as brown oil in 74% yield (34.2 mg).  $^1\text{H}$  NMR (400 MHz,  $\text{CDCl}_3$ )  $\delta$  7.59 – 7.52 (m, 3H), 7.41 – 7.38 (m, 3H), 6.75 (d,  $J = 16.2$  Hz, 1H), 2.87 (t,  $J = 7.3$  Hz, 2H), 2.71 (t,  $J = 7.3$  Hz, 2H), 2.29 (s, 6H);  $^{13}\text{C}$  NMR (100 MHz,  $\text{CDCl}_3$ )  $\delta$  199.2, 143.0, 134.5, 130.7, 129.1, 128.5, 126.2, 54.4, 45.5, 39.1; HRMS (ESI)  $m/z$   $[\text{M}+\text{H}]^+$ : Calcd for  $\text{C}_{13}\text{H}_{18}\text{NO}$ : 204.1388. Found: 204.1387.

**(E)-5-(Dimethylamino)-2-methyl-1-phenylpent-1-en-3-one (3ra):**

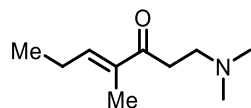

The title compound was prepared according to the general procedure Method A (MeOH/DCM = 1/9,  $R_f$  = 0.25). The product was obtained as brown oil in 61% yield (20.7 mg).  $^1\text{H}$  NMR (400 MHz,  $\text{CDCl}_3$ )  $\delta$  6.77 – 6.73 (m, 1H), 3.36 (s, 4H), 2.78 (s, 6H), 2.31 – 2.24 (m, 2H), 1.77 – 1.76 (m, 3H), 1.09 (t,  $J$  = 7.6 Hz, 3H)  $^{13}\text{C}$  NMR (100 MHz,  $\text{CDCl}_3$ )  $\delta$  197.2, 147.1, 136.0, 53.3, 43.6, 32.6, 29.8, 22.7, 13.0, 11.2; HRMS (ESI)  $m/z$   $[\text{M}+\text{H}]^+$ : Calcd for  $\text{C}_{10}\text{H}_{20}\text{NO}$ : 170.1545. Found: 170.1539.

### 1-(Dimethylamino)heptan-3-one (3sa):

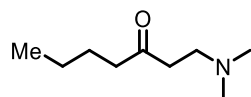

The title compound was prepared according to the general procedure Method A (MeOH/DCM = 1/9,  $R_f$  = 0.20). The product was obtained as yellow oil in 54% yield (17.0 mg).  $^1\text{H}$  NMR (400 MHz,  $\text{CDCl}_3$ )  $\delta$  3.30 (t,  $J$  = 6.8 Hz, 2H), 3.15 (t,  $J$  = 6.9 Hz, 2H), 2.78 (s, 6H), 2.48 (t,  $J$  = 7.5 Hz, 2H), 1.58 – 1.51 (m, 2H), 1.34 – 1.26 (m, 2H), 0.89 (t,  $J$  = 7.3 Hz, 3H).  $^{13}\text{C}$  NMR (100 MHz,  $\text{CDCl}_3$ )  $\delta$  206.8, 52.4, 43.5, 42.8, 37.6, 25.7, 22.3, 13.9; HRMS (ESI)  $m/z$   $[\text{M}+\text{H}]^+$ : Calcd for  $\text{C}_9\text{H}_{20}\text{NO}$ : 158.1545. Found: 158.1543.

### 1-Cyclohexyl-3-(dimethylamino)propan-1-one (3ta):

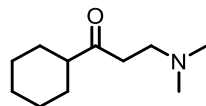

The title compound was prepared according to the general procedure Method A (MeOH/DCM = 1/9,  $R_f$  = 0.25). The product was obtained as brown oil in 67% yield (24.6 mg).  $^1\text{H}$  NMR (400 MHz,  $\text{CDCl}_3$ )  $\delta$  2.65 – 2.62 (m, 2H), 2.60 – 2.56 (m, 2H), 2.34 – 2.27 (m, 1H), 2.23 (s, 6H), 1.81 – 1.78 (m, 2H), 1.75 – 1.71 (m, 2H), 1.64 – 1.60 (m, 1H), 1.33 – 1.11 (m, 5H);  $^{13}\text{C}$  NMR (100 MHz,  $\text{CDCl}_3$ )  $\delta$  212.7, 53.8, 51.1, 45.3, 38.6, 28.5, 25.7; HRMS (ESI)  $m/z$   $[\text{M}+\text{H}]^+$ : Calcd for  $\text{C}_{11}\text{H}_{22}\text{NO}$ : 184.1701. Found:

184.1707.

**1-((3r,5r,7r)-Adamantan-1-yl)-3-(dimethylamino)propan-1-one (3ua):**

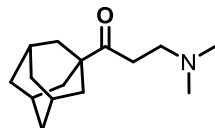

The title compound was prepared according to the general procedure Method A (MeOH/DCM = 1/9,  $R_f$  = 0.25). The product was obtained as yellow oil in 75% yield (35.3 mg).  $^1\text{H}$  NMR (400 MHz,  $\text{CDCl}_3$ )  $\delta$  2.70 – 2.65 (m, 2H), 2.62 – 2.58 (m, 2H), 2.27 (s, 6H), 2.00 (s, 3H), 1.77 (d,  $J$  = 2.7 Hz, 6H), 1.67 (dd,  $J$  = 12.2 Hz, 6H);  $^{13}\text{C}$  NMR (100 MHz,  $\text{CDCl}_3$ )  $\delta$  214.2, 53.9, 46.6, 45.3, 38.3, 36.6, 34.2, 28.0; HRMS (ESI)  $m/z$   $[\text{M}+\text{H}]^+$ : Calcd for  $\text{C}_{15}\text{H}_{26}\text{NO}$ : 236.2014. Found: 236.2021.

**3-(Diethylamino)-1-phenylpropan-1-one (3ab):**

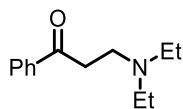

The title compound was prepared according to the general procedure Method A (MeOH/DCM = 1/9,  $R_f$  = 0.20). The product was obtained as brown solid. yield: 82% (33.7 mg). m.p. 105 - 108 °C.  $^1\text{H}$  NMR (400 MHz,  $\text{CDCl}_3$ )  $\delta$  7.98 – 7.95 (m, 2H), 7.58 – 7.54 (m, 1H), 7.48 – 7.44 (m, 2H), 3.22 – 3.18 (m, 2H), 2.99 – 2.95 (m, 2H), 2.63 (q,  $J$  = 7.2 Hz, 4H), 1.08 (t,  $J$  = 7.2 Hz, 6H);  $^{13}\text{C}$  NMR (100 MHz,  $\text{CDCl}_3$ )  $\delta$  199.6, 137.0, 133.3, 128.8, 128.2, 47.9, 47.1, 36.2, 11.6; HRMS (ESI)  $m/z$   $[\text{M}+\text{H}]^+$ : Calcd for  $\text{C}_{13}\text{H}_{20}\text{NO}$ : 206.1545. Found: 206.1538.

**3-(Methoxy(methyl)amino)-1-phenylpropan-1-one (3ac):**

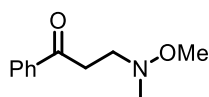

The title compound was prepared according to the general procedure Method A (EA/PE = 1/9,  $R_f$  = 0.45). The product was obtained as brown oil in 88% yield (34.0 mg).  $^1\text{H}$  NMR (400 MHz,  $\text{CDCl}_3$ )  $\delta$  8.00 – 7.97 (m, 2H), 7.58 – 7.54 (m, 1H), 7.49 – 7.44 (m,

2H), 3.48 (s, 3H), 3.26 (t,  $J = 6.9$  Hz, 2H), 3.07 (t,  $J = 6.9$  Hz, 2H), 2.62 (s, 3H);  $^{13}\text{C}$  NMR (100 MHz,  $\text{CDCl}_3$ )  $\delta$  199.2, 137.5, 133.2, 128.7, 128.2, 60.2, 55.7, 45.3, 36.4; HRMS (ESI)  $m/z$   $[\text{M}+\text{H}]^+$ : Calcd for  $\text{C}_{11}\text{H}_{16}\text{NO}_2$ : 194.1181. Found: 194.1179.

### 3-(Methyl(phenyl)amino)-1-phenylpropan-1-one (3ad):

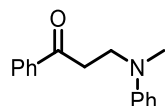

The title compound was prepared according to the general procedure Method B (EA/PE = 1/9,  $R_f = 0.50$ ). The product was obtained as yellow solid in 87% yield (41.6 mg), m.p. 59 - 60 °C.  $^1\text{H}$  NMR (400 MHz,  $\text{CDCl}_3$ )  $\delta$  7.96 – 7.93 (m, 2H), 7.59 – 7.55 (m, 1H), 7.48 – 7.44 (m, 2H), 7.30 – 7.24 (m, 2H), 6.78 – 6.73 (m, 3H), 3.87 – 3.84 (m, 2H), 3.27 – 3.23 (m, 2H), 2.99 (s, 3H);  $^{13}\text{C}$  NMR (100 MHz,  $\text{CDCl}_3$ )  $\delta$  199.7, 148.7, 137.0, 133.4, 129.5, 128.8, 128.2, 116.7, 112.5, 48.1, 38.7, 35.3; HRMS (ESI)  $m/z$   $[\text{M}+\text{H}]^+$ : Calcd for  $\text{C}_{16}\text{H}_{18}\text{NO}$ : 240.1388. Found: 240.1392

### 3-(Benzyl(methyl)amino)-1-phenylpropan-1-one (3ae):

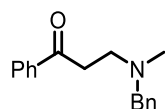

The title compound was prepared according to the general procedure Method B (MeOH/DCM = 1/9,  $R_f = 0.60$ ). The product was obtained as yellow solid in 71% yield (36.0 mg), m.p. 187 - 188 °C.  $^1\text{H}$  NMR (400 MHz,  $\text{CDCl}_3$ )  $\delta$  7.95 – 7.92 (m, 2H), 7.58 – 7.54 (m, 1H), 7.47 – 7.43 (m, 2H), 7.30 – 7.29 (m, 4H), 7.25 – 7.23 (m, 1H), 3.56 (s, 2H), 3.21 – 3.18 (m, 2H), 2.91 – 2.87 (m, 2H), 2.26 (s, 3H);  $^{13}\text{C}$  NMR (100 MHz,  $\text{CDCl}_3$ )  $\delta$  199.6, 138.9, 137.1, 133.2, 129.1, 128.7, 128.4, 128.2, 127.2, 62.5, 52.6, 42.4, 37.0; HRMS (ESI)  $m/z$   $[\text{M}+\text{H}]^+$ : Calcd for  $\text{C}_{17}\text{H}_{20}\text{NO}$ : 254.1545. Found: 254.1546.

### 3-(Dibenzylamino)-1-phenylpropan-1-one (3af):

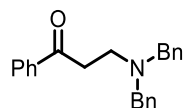

The title compound was prepared according to the general procedure Method B (EA/PE = 1/4,  $R_f$  = 0.55). The product was obtained as yellow solid in 65% yield (42.8 mg), m.p. 38 - 40 °C.  $^1\text{H}$  NMR (400 MHz,  $\text{CDCl}_3$ )  $\delta$  7.84 – 7.82 (m, 2H), 7.55 – 7.51 (m, 1H), 7.42 – 7.38 (m, 2H), 7.35 – 7.34 (m, 4H), 7.31 – 7.27 (m, 4H), 7.24 – 7.21 (m, 2H), 3.64 (s, 4H), 3.16 – 3.12 (m, 2H), 2.95 (t,  $J$  = 7.3 Hz, 2H);  $^{13}\text{C}$  NMR (100 MHz,  $\text{CDCl}_3$ )  $\delta$  199.8, 139.5, 137.0, 133.1, 128.9, 128.7, 128.4, 128.2, 127.1, 58.7, 49.4, 37.1; HRMS (ESI)  $m/z$   $[\text{M}+\text{H}]^+$ : Calcd for  $\text{C}_{23}\text{H}_{24}\text{NO}$ : 330.1858. Found: 330.1852.

**1-Phenyl-3-(pyrrolidin-1-yl)propan-1-one (3ag):**

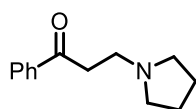

The title compound was prepared according to the general procedure Method A (MeOH/DCM = 1/9,  $R_f$  = 0.20). The product was obtained as brown solid in 73% yield (29.7 mg), m.p. 155 - 156 °C.  $^1\text{H}$  NMR (400 MHz,  $\text{CDCl}_3$ )  $\delta$  7.95 – 7.93 (m, 2H), 7.55 – 7.51 (m, 1H), 7.45 – 7.41 (m, 2H), 3.27 – 3.23 (m, 2H), 2.96 – 2.92 (m, 2H), 2.63 – 2.59 (m, 4H), 1.84 – 1.79 (m, 4H);  $^{13}\text{C}$  NMR (100 MHz,  $\text{CDCl}_3$ )  $\delta$  197.5, 136.1, 133.9, 128.9, 128.3, 54.2, 50.5, 36.2, 23.5; HRMS (ESI)  $m/z$   $[\text{M}+\text{H}]^+$ : Calcd for  $\text{C}_{13}\text{H}_{18}\text{NO}$ : 204.1388. Found: 204.1385.

**1-Phenyl-3-(piperidin-1-yl)propan-1-one (3ah):**

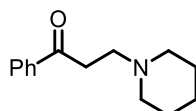

The title compound was prepared according to the general procedure Method A (EA/PE = 1/4,  $R_f$  = 0.70). The product was obtained as brown solid in 80% yield (34.7 mg), m.p. 192 - 193 °C.  $^1\text{H}$  NMR (400 MHz,  $\text{CDCl}_3$ )  $\delta$  7.94 – 7.91 (m, 2H), 7.54 – 7.50 (m, 1H), 7.44 – 7.40 (m, 2H), 3.29 – 3.25 (m, 2H), 2.89 – 2.85 (m, 2H), 2.53 (s, 4H), 1.66 – 1.61 (m, 4H), 1.47 – 1.44 (m, 2H);  $^{13}\text{C}$  NMR (100 MHz,  $\text{CDCl}_3$ )  $\delta$  198.9, 136.7, 133.4, 128.8, 128.2, 54.6, 53.6, 35.8, 25.4, 23.9; HRMS (ESI)  $m/z$   $[\text{M}+\text{H}]^+$ : Calcd for  $\text{C}_{14}\text{H}_{20}\text{NO}$ : 218.1545. Found: 218.1547.

### 3-Morpholino-1-phenylpropan-1-one (3ai):

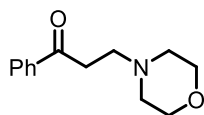

The title compound was prepared according to the general procedure Method A (MeOH/DCM = 1/9,  $R_f$  = 0.75). The product was obtained as yellow oil in 79% yield (34.6 mg).  $^1\text{H}$  NMR (400 MHz,  $\text{CDCl}_3$ )  $\delta$  7.97 – 7.94 (m, 2H), 7.59 – 7.54 (m, 1H), 7.48 – 7.44 (m, 2H), 3.73 – 3.71 (m, 4H), 3.22 – 3.18 (m, 2H), 2.84 (t,  $J$  = 7.4 Hz, 2H), 2.53 – 2.51 (m, 4H);  $^{13}\text{C}$  NMR (100 MHz,  $\text{CDCl}_3$ )  $\delta$  199.0, 136.9, 133.3, 128.8, 128.2, 67.0, 53.8, 53.6, 36.0; HRMS (ESI)  $m/z$   $[\text{M}+\text{H}]^+$ : Calcd for  $\text{C}_{14}\text{H}_{20}\text{NO}$ : 220.1338. Found: 220.1344.

### 3-(Indolin-1-yl)-1-phenylpropan-1-one (3aj):

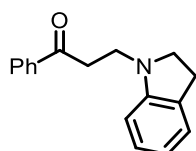

The title compound was prepared according to the general procedure Method B (EA/PE = 1/9,  $R_f$  = 0.60). The product was obtained as brown oil in 85% yield (42.7 mg).  $^1\text{H}$  NMR (400 MHz,  $\text{CDCl}_3$ )  $\delta$  8.00 – 7.97 (m, 2H), 7.61 – 7.56 (m, 1H), 7.50 – 7.46 (m, 2H), 7.11 – 7.07 (m, 2H), 6.69 – 6.65 (m, 1H), 6.55 (d,  $J$  = 7.9 Hz, 1H), 3.60 (t,  $J$  = 7.1 Hz, 2H), 3.42 (t,  $J$  = 8.3 Hz, 2H), 3.28 (t,  $J$  = 7.1 Hz, 2H), 2.97 (t,  $J$  = 8.3 Hz, 2H);  $^{13}\text{C}$  NMR (100 MHz,  $\text{CDCl}_3$ )  $\delta$  199.3, 152.0, 137.0, 133.4, 130.2, 128.8, 128.2, 127.5, 124.6, 117.8, 107.1, 53.4, 44.3, 35.9, 28.8; HRMS (ESI)  $m/z$   $[\text{M}+\text{H}]^+$ : Calcd for  $\text{C}_{17}\text{H}_{18}\text{NO}$ : 252.1388. Found: 252.1380.

### 3-(3,4-Dihydroquinolin-1(2H)-yl)-1-phenylpropan-1-one (3ak):

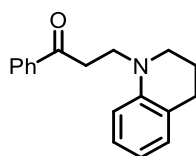

The title compound was prepared according to the general procedure Method B (EA/PE = 1/9,  $R_f$  = 0.50). The product was obtained as yellow oil in 68% yield (36.1 mg).  $^1\text{H}$

NMR (400 MHz, CDCl<sub>3</sub>)  $\delta$  7.97 – 7.95 (m, 2H), 7.59 – 7.55 (m, 1H), 7.49 – 7.44 (m, 2H), 7.10 – 7.06 (m, 1H), 6.98 – 6.96 (m, 1H), 6.64 – 6.59 (m, 2H), 3.79 – 3.76 (m, 2H), 3.35 – 3.32 (m, 2H), 3.30 – 3.26 (m, 2H), 2.76 (t,  $J$  = 6.4 Hz, 2H), 1.98 – 1.92 (m, 2H); <sup>13</sup>C NMR (100 MHz, CDCl<sub>3</sub>)  $\delta$  201.0, 196.7, 144.0, 136.4, 133.6, 129.4, 128.7, 128.1, 127.3, 125.8 (q,  $J$  = 3.8), 51.8, 46.2, 21.2; <sup>19</sup>F NMR (376 MHz, CDCl<sub>3</sub>)  $\delta$  -62.7 (s, 3F); HRMS (ESI)  $m/z$  [M+H]<sup>+</sup>: Calcd for C<sub>18</sub>H<sub>20</sub>NO: 266.1545. Found: 266.1543.

### 3-(3,4-Dihydroisoquinolin-2(1H)-yl)-1-phenylpropan-1-one (3al):

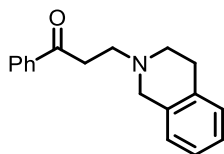

The title compound was prepared according to the general procedure Method B (EA/PE = 1/4,  $R_f$  = 0.40). The product was obtained as yellow oil in 66% yield (35.0 mg). <sup>1</sup>H NMR (400 MHz, CDCl<sub>3</sub>)  $\delta$  8.01 – 7.98 (m, 2H), 7.61 – 7.56 (m, 1H), 7.50 – 7.46 (m, 2H), 7.14 – 7.11 (m, 3H), 7.04 – 7.03 (m, 1H), 3.73 (s, 2H), 3.33 (t,  $J$  = 7.4 Hz, 2H), 3.05 – 3.02 (m, 2H), 2.93 (d,  $J$  = 5.6 Hz, 2H), 2.84 (t,  $J$  = 5.0 Hz, 2H); <sup>13</sup>C NMR (100 MHz, CDCl<sub>3</sub>)  $\delta$  199.2, 137.0, 134.4, 134.1, 133.3 128.8, 128.2, 126.7, 125.8, 56.2, 53.0, 51.2, 36.8, 29.1; HRMS (ESI)  $m/z$  [M+H]<sup>+</sup>: Calcd for C<sub>18</sub>H<sub>20</sub>NO: 266.1545. Found: 266.1544.

### General procedure for mechanism studies:

#### Control experiments:

(a) A tube was charged with **1a** (0.20 mmol, 1.0 equiv.), **2a** (0.30 mmol, 1.5 equiv.), HBpin (0.50 mmol, 2.5 equiv.) and TEMPO (0.40 mmol, 2.0 equiv.) in THF (2.0 mL). The resulting mixture was stirred at room temperature until the starting material was consumed completely (about 4.0 h). The reaction solution was concentrated under reduced pressure and purified by column chromatography (dichloromethane: methanol = 9 : 1) to afford the product **3aa** as yellow solid. Yield: 87% (30.9 mg).

(b) A tube was charged with **1a** (0.20 mmol, 1.0 equiv.) and HBpin (0.50 mmol, 2.5 equiv.) in THF (2.0 mL). The reaction mixture was stirred at room temperature for 24 hours. The solution was concentrated in *vacuo*. The crude yield was detected from <sup>1</sup>H NMR using 1,1,2,2-tetrachloroethane as an internal standard (NMR yield: 0%).

(c) A tube was charged with **1a** (0.20 mmol, 1.0 equiv.), **2a** (0.30 mmol, 1.5 equiv.), HBpin (0.30 mmol, 1.5 equiv.) in THF (2.0 mL). The resulting mixture was stirred at room temperature until the starting material **1a** was consumed completely (4.0 h). The reaction solution was concentrated under reduced pressure and purified by column chromatography (dichloromethane: methanol = 9: 1) to afford the product **3aa** (35%, 12.4 mg) + **3aa'** (59%, 20.7 mg).

(d) To a flame-dried vial was added amine **4** (2.0 mmol, 1.0 equiv), HBpin (2.0 mmol, 1.0 equiv) and CH<sub>3</sub>CN. The reaction was carried out at 120 °C for 24 hours. After the reaction was completed, removal of all the volatiles under vacuum could obtain pure product **2f-B**. Yield: 89% (575.4 mg). The base (NaO<sup>t</sup>Bu, 0.05 mmol) and dibenzylamino-pinacolborane (0.30 mmol, 1.5 equiv.) were transferred into a tube under air atmosphere with methanol (2.0 mL). The ynones (0.20 mmol, 1.0 equiv.) and HBpin (0.30 mmol, 1.5 equiv.) was then added and the reaction mixture was stirred at 70 °C external temperature for 17 hours. The crude product was purified by flash column chromatography (petroleum ether: ethyl acetate = 9: 1) to afford the product **3af**. Yield: 75% (49.5 mg).

#### **D-labelling experiments:**

(a) A mixture of **1a** (0.20 mmol, 1.0 equiv.), **2a** (0.30 mmol, 1.5 equiv.), HBpin (0.50 mmol, 2.5 equiv.), D<sub>2</sub>O (1.0 mmol, 5.0 equiv.) and anhydrous THF (2.0 mL) was added in an oven-dried Schlenk tube under nitrogen protection. The resulting mixture was stirred at room temperature for 4.0 hours. Then the reaction solution was concentrated under reduced pressure and purified by column chromatography (dichloromethane: methanol = 9: 1) to afford the product **3aa**. Yield: 64% (22.7 mg).



(b) A mixture of **1a** (0.20 mmol, 1.0 equiv.), **2f-d** (0.30 mmol, 1.5 equiv.), HBpin (0.50 mmol, 2.5 equiv.) and THF (2.0 mL) was added in an oven-dried Schlenk tube. The resulting mixture was stirred at room temperature for 4.0 hours. Then the reaction solution was concentrated under reduced pressure and purified by column chromatography (dichloromethane: methanol = 9: 1) to afford the product **3af-I**. Yield: 62% (41.1 mg).

(c) A mixture of **1a** (0.20 mmol, 1.0 equiv.), **2f-d** (0.30 mmol, 1.5 equiv.) and THF (2.0 mL) was added in an oven-dried Schlenk tube. The resulting mixture was stirred at room temperature for 4.0 hours. Then the reaction solution was concentrated under reduced pressure and purified by column chromatography (dichloromethane: methanol = 9: 1) to afford the product **3af'-I**. Yield: 81% (53.3 mg).

(d) A mixture of NaBD<sub>4</sub> (1.5 mmol, 62.8 mg, 3.0 equiv.), pinacol (0.5 mmol, 59.2 mg, 2.5 equiv.) and dry DCE (0.4 mL) was added in an oven-dried Schlenk tube under nitrogen protection. Then a solution of iodine (0.80 mmol, 200.0 mg, 1.6 equiv.) in dry DCE (0.4 mL) was added dropwise. The resulting mixture was stirred at room temperature for 2.0 h. Then **1a** (0.2 mmol, 1.0 equiv.), **2a** (0.3 mmol, 1.5 equiv.) and THF (2.0 mL) was added subsequently and the reaction mixture was stirred at room temperature until the starting material was consumed completely. Then the reaction solution was concentrated under reduced pressure and purified by column chromatography (dichloromethane: methanol = 9: 1) to afford the product **3aa-I**. Yield: 67% (23.8 mg).

### **General procedure for applications and their spectral data:**

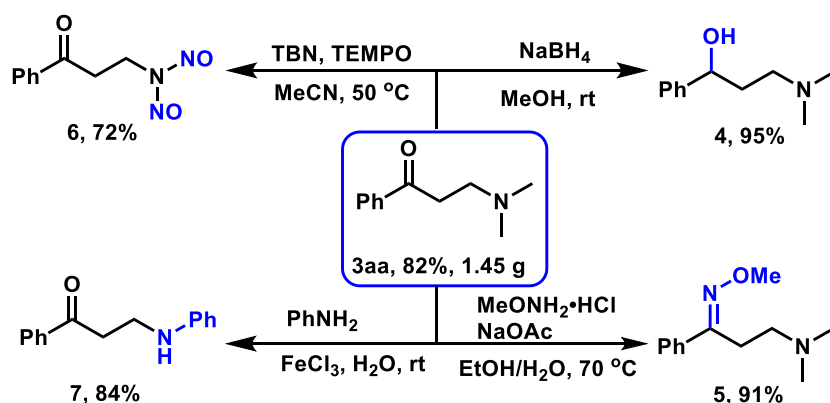

Scheme S1. Synthetic applications

Gram scale synthesis of **3aa**: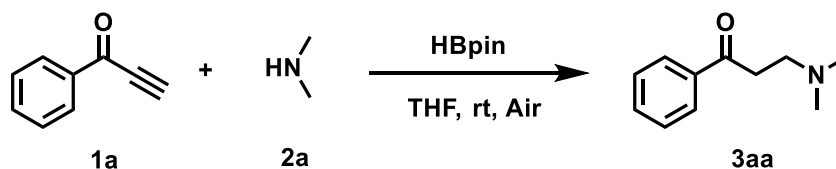

A tube was charged with **1a** (10.0 mmol, 1.30 g, 1.0 equiv.), **2a** (15.0 mmol, 7.5 mL, 1.5 equiv., 2.0 M in THF), HBpin (25.0 mmol, 3.20 g, 2.5 equiv.) under open-flask in THF (100.0 mL). The resulting mixture was stirred at room temperature until the **1** was consumed completely (about 6.0 hours). After completion of the reaction (monitored by TLC), the reaction solution was concentrated under reduced pressure and purified by column chromatography (dichloromethane: methanol = 9: 1) to give the desired product **3aa** as yellow solid in 82% yield (1.45 g).

3-(Dimethylamino)-1-phenylpropan-1-ol (**4**):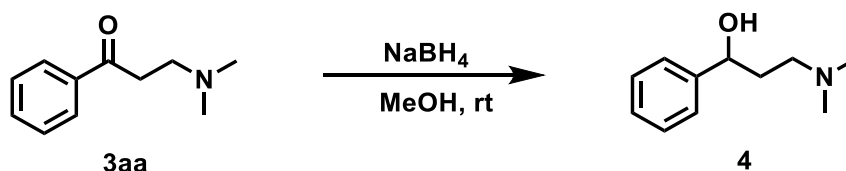

To a solution of 3-(dimethylamino)-1-phenylpropan-1-one **3aa** (0.20 mmol, 35.5 mg, 1.0 equiv.) in MeOH (2.0 mL) was added NaBH<sub>4</sub> (0.40 mmol, 83.2 mg, 2.0 equiv.) at room temperature and the reaction mixture was stirred at the same temperature for 30 min under nitrogen atmosphere. The mixture was poured into H<sub>2</sub>O (5 mL) and extracted

with EtOAc (10 mL). The organic layer was washed with brine (10 mL) and dried with Na<sub>2</sub>SO<sub>4</sub>. After removal of the solvent, the residue was subjected to column chromatography to give **4** as brown oil in 95% yield (34.1 mg). <sup>1</sup>H NMR (400 MHz, CDCl<sub>3</sub>) δ 7.39 – 7.31 (m, 4H), 7.25 – 7.21 (m, 1H), 6.33 (s, 1H), 4.90 (dd, *J*<sub>1</sub> = 7.5, *J*<sub>2</sub> = 4.2 Hz, 1H), 2.66 – 2.59 (m, 1H), 2.49 – 2.43 (m, 1H), 2.28 (s, 6H), 1.88 – 1.77 (m, 2H); <sup>13</sup>C NMR (100 MHz, CDCl<sub>3</sub>) δ 145.3, 128.3, 127.0, 125.7, 75.5, 58.3, 45.4, 34.8; HRMS (ESI) *m/z* [M+H]<sup>+</sup>: Calcd for C<sub>11</sub>H<sub>18</sub>NO: 180.1388. Found: 180.1383.

**(*E*)-3-(Dimethylamino)-1-phenylpropan-1-one *O*-methyloxime (**5**):**

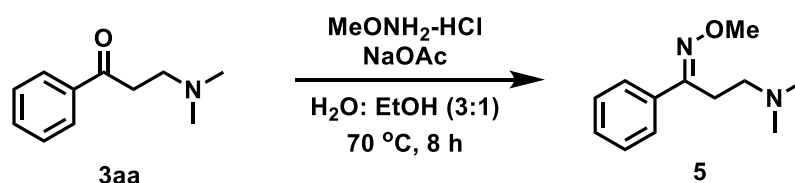

To a 15 mL tube equipped with a stir bar was added 3-(dimethylamino)-1-phenylpropan-1-one **3aa** (0.20 mmol, 34.5 mg, 1.0 equiv.), MeONH<sub>2</sub>·HCl (0.54 mmol, 45.2 mg, 2.7 equiv.), NaOAc (0.88 mmol, 72.2 mg, 4.4 equiv.), H<sub>2</sub>O (1.5 mL) and EtOH (0.5 mL). The flask was equipped with a reflux condenser and heated at 70°C for 8 h. After cooling to room temperature, the mixture was extracted with EtOAc (3 x 10 mL). The organic layers were combined, dried with Na<sub>2</sub>SO<sub>4</sub>, and concentrated. The purification was performed by flash column chromatography to afford desired pure oximes **5** as yellow oil in 91% yield (37.6 mg). <sup>1</sup>H NMR (400 MHz, CDCl<sub>3</sub>) δ 7.67 – 7.65 (m, 3H), 7.39 – 7.35 (m, 2H), 3.99 (s, 3H), 3.06 – 3.02 (m, 2H), 2.68 – 2.64 (m, 2H), 2.43 (s, 6H); <sup>13</sup>C NMR (100 MHz, CDCl<sub>3</sub>) δ 155.8, 135.2, 129.5, 128.8, 126.3, 62.2, 52.3, 44.6, 24.5; HRMS (ESI) *m/z* [M+H]<sup>+</sup>: Calcd for C<sub>12</sub>H<sub>19</sub>N<sub>2</sub>O: 207.1497. Found: 207.1496.

***N*-Nitroso-*N*-(3-oxo-3-phenylpropyl)nitrous amide (**6**):**

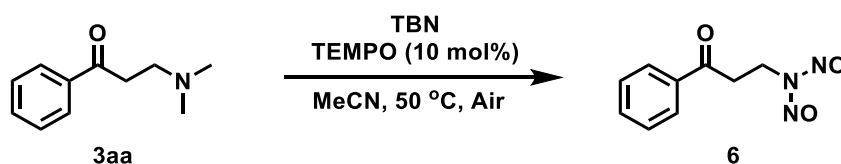

A tube was charged with 3-(dimethylamino)-1-phenylpropan-1-one **3aa** (0.20 mmol,

34.5 mg, 1.0 equiv.), *t*-butyl nitrite (TBN) (0.30 mmol, 30.9 mg, 1.5 equiv.) and 2,2,6,6-tetramethyl-1-piperidinyloxy (TEMPO) (0.02 mmol, 3.2 mg, 10 mol %) in CH<sub>3</sub>CN (2 mL). And the reaction mixture was stirred at 70 °C until the starting material was fully consumed (24 h). The organic layers were combined, dried with Na<sub>2</sub>SO<sub>4</sub>, and concentrated. The purification was performed by flash column chromatography to give **6** as yellow solid in 72% yield (29.9 mg). m.p. 71 - 73 °C. <sup>1</sup>H NMR (400 MHz, CDCl<sub>3</sub>) δ 8.01 – 7.97 (m, 2H), 7.65 – 7.61 (m, 1H), 7.53 – 7.49 (m, 2H), 4.84 (t, *J* = 6.1 Hz, 2H), 3.67 (t, *J* = 6.1 Hz, 2H); <sup>13</sup>C NMR (100 MHz, CDCl<sub>3</sub>) δ 195.1, 135.8, 134.1, 129.0, 128.3, 69.4, 35.0; HRMS (ESI) *m/z* [M+H]<sup>+</sup>: Calcd for C<sub>9</sub>H<sub>10</sub>N<sub>3</sub>O<sub>3</sub>: 208.0722. Found: 208.0715.

#### 1-Phenyl-3-(phenylamino)propan-1-one (**7**):

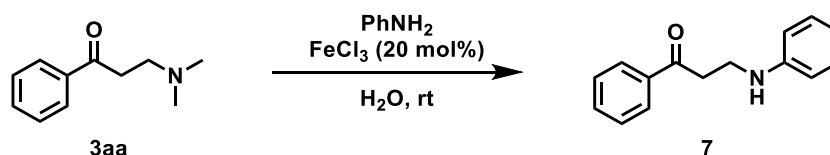

A tube was charged with 3-(dimethylamino)-1-phenylpropan-1-one **3aa** (0.20 mmol, 34.5 mg, 1.0 equiv.), aniline (0.20 mmol, 18.7 mg, 1.0 equiv.), FeCl<sub>3</sub> (0.04 mmol, 6.5 mg, 20 mol %) in H<sub>2</sub>O (5.0 mL). The resulting mixture was stirred at room temperature until the starting material was fully consumed. And then the mixture was extracted with EtOAc (3 x 10 mL). The organic layers were combined, dried with Na<sub>2</sub>SO<sub>4</sub>, and concentrated. The purification was performed by flash column chromatography to afford desired pure oximes **7** as yellow solid in 82% yield (37.0 mg). m.p. 102 - 104 °C. <sup>1</sup>H NMR (400 MHz, CDCl<sub>3</sub>) δ 7.97 – 7.95 (m, 2H), 7.60 – 7.56 (m, 1H), 7.49 – 7.45 (m, 2H), 7.22 – 7.17 (m, 2H), 6.75 – 6.71 (m, 1H), 6.69 – 6.66 (m, 2H), 3.63 (t, *J* = 6.1 Hz, 2H), 3.30 (t, *J* = 6.1 Hz, 2H); <sup>13</sup>C NMR (100 MHz, CDCl<sub>3</sub>) δ 199.5, 147.7, 136.8, 133.5, 129.5, 128.8, 128.2, 117.9, 113.3, 39.0, 37.7; HRMS (ESI) *m/z* [M+H]<sup>+</sup>: Calcd for C<sub>15</sub>H<sub>16</sub>NO: 226.1232. Found: 226.1234.

#### General procedures for *Proroxan* and *Propipocaine*:

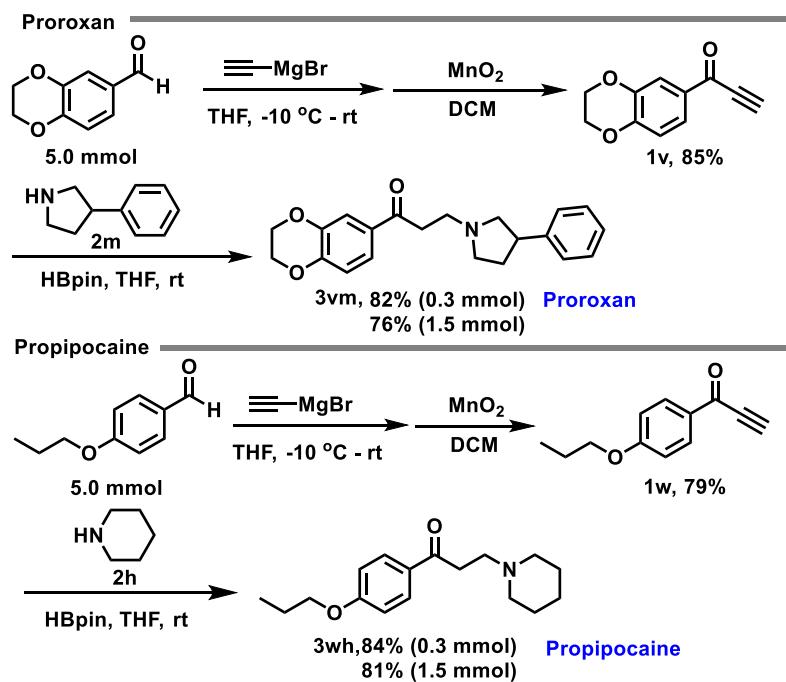

**Scheme S2.** Synthesis of drug molecules.

**1-(2,3-Dihydrobenzo[b][1,4]dioxin-6-yl)prop-2-yn-1-one (1v):**

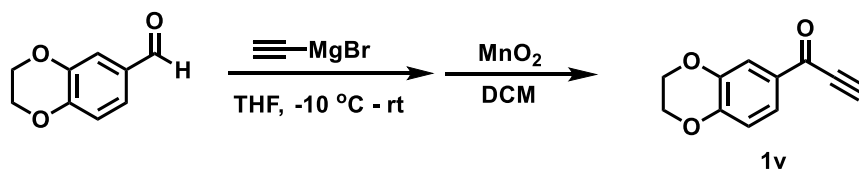

The title compound was prepared according to the general procedure (EA/PE = 1/9,  $R_f$  = 0.60). The product was obtained as yellow solid in 85% yield (799.8 mg), m.p. 106 - 107 °C.  $^1\text{H NMR}$  (400 MHz,  $\text{CDCl}_3$ )  $\delta$  7.68 – 7.64 (m, 2H), 6.90 (d,  $J$  = 8.4 Hz, 1H), 4.32 – 4.30 (m, 2H), 4.27 – 4.25 (m, 2H), 3.38 (s, 1H);  $^{13}\text{C NMR}$  (100 MHz,  $\text{CDCl}_3$ )  $\delta$  176.0, 149.6, 143.5, 130.3, 124.3, 119.0, 117.6, 80.4, 64.9, 64.1; HRMS (ESI)  $m/z$   $[\text{M}+\text{H}]^+$ : Calcd for  $\text{C}_{11}\text{H}_9\text{O}_3$ : 189.0552. Found: 189.0554.

**1-(2,3-Dihydrobenzo[b][1,4]dioxin-6-yl)-3-(3-phenylpyrrolidin-1-yl)propan-1-one(Proroxan, 3vm):**

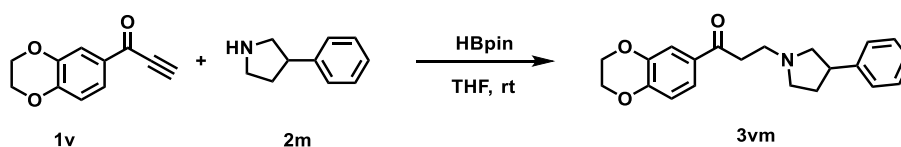

A tube was charged with **1v** (0.30 mmol, 56.5 mg, 1.0 equiv.), **2m** (0.45 mmol, 66.3

mg, 1.5 equiv.), HBpin (0.75 mmol, 96.0 mg, 2.5 equiv.) in THF (2.0 mL). And the reaction mixture was stirred until the **1v** was consumed completely. After completion of the reaction (monitored by TLC, MeOH/DCM = 1/9,  $R_f = 0.25$ ), the reaction mixture was concentrated under reduced pressure and purified by column chromatography (dichloromethane: methanol = 9: 1). The product **3vm** was obtained as yellow oil in 82% yield (0.30 mmol scale, 83.0 mg) and 76% yield (1.5 mmol scale, 384.7 mg).  $^1\text{H NMR}$  (400 MHz,  $\text{CDCl}_3$ )  $\delta$  7.51 – 7.48 (m, 2H), 7.29 – 7.23 (m, 4H), 7.19 – 7.15 (m, 1H), 6.89 – 6.87 (m, 1H), 4.28 – 4.26 (m, 2H), 4.24 – 4.22 (m, 2H), 3.38 (p,  $J = 8.0$  Hz, 1H), 3.19 – 3.11 (m, 3H), 3.05 – 3.00 (m, 1H), 2.98 – 2.89 (m, 2H), 2.78 – 2.72 (m, 1H), 2.62 – 2.57 (m, 1H), 2.37 – 2.28 (m, 1H), 1.94 – 1.85 (m, 1H);  $^{13}\text{C NMR}$  (100 MHz,  $\text{CDCl}_3$ )  $\delta$  197.5, 148.2, 144.9, 143.5, 130.8, 128.6, 127.4, 126.4, 122.3, 117.7, 117.4, 64.8, 64.2, 62.3, 54.8, 51.3, 43.5, 37.6, 33.3; HRMS (ESI)  $m/z$   $[\text{M}+\text{H}]^+$ : Calcd for  $\text{C}_{21}\text{H}_{24}\text{NO}_3$ : 338.1756. Found: 338.1753.

#### 1-(4-Propoxyphenyl)prop-2-yn-1-one (**1w**):

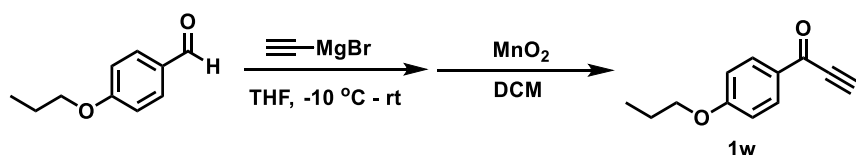

The title compound was prepared according to the general procedure (EA/PE = 1/9,  $R_f = 0.65$ ). The product was obtained as yellow oil in 79% yield (648.6 mg).  $^1\text{H NMR}$  (400 MHz,  $\text{CDCl}_3$ )  $\delta$  8.09 – 8.06 (m, 2H), 6.92 – 6.89 (m, 2H), 3.96 (t,  $J = 6.5$  Hz, 2H), 3.40 (s, 1H), 1.80 (h,  $J = 7.3$  Hz, 2H), 1.02 (t,  $J = 7.4$  Hz, 3H);  $^{13}\text{C NMR}$  (100 MHz,  $\text{CDCl}_3$ )  $\delta$  176.1, 164.6, 132.3, 129.4, 114.5, 80.5, 80.3, 70.0, 22.5, 10.6; HRMS (ESI)  $m/z$   $[\text{M}+\text{H}]^+$ : Calcd for  $\text{C}_{12}\text{H}_{13}\text{O}_2$ : 189.0916. Found: 189.0921.

#### 3-(Piperidin-1-yl)-1-(4-propoxyphenyl)propan-1-one (Propipocaine, **3wh**):

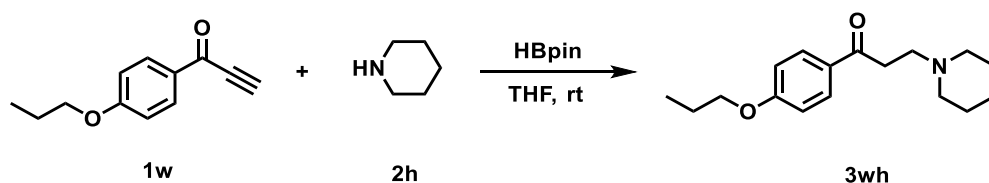

A tube was charged with **1w** (56.5 mg, 0.3 mmol, 1.0 equiv.), **2h** (38.4 mg, 0.45 mmol,

1.5 equiv.), HBpin (0.75 mmol, 96.0 mg, 2.5 equiv.) in THF (2.0 mL). And the reaction mixture was stirred until the **1v** was consumed completely. After completion of the reaction (monitored by TLC, MeOH/DCM = 1/9,  $R_f = 0.25$ ), the reaction mixture was concentrated under reduced pressure and purified by column chromatography (dichloromethane: methanol = 9: 1). The product **3wh** was obtained as yellow oil in 84% yield (0.30 mmol scale, 70.0 mg) and 81% yield (1.5 mmol scale, 334.6 mg).  $^1\text{H}$  NMR (400 MHz,  $\text{CDCl}_3$ )  $\delta$  7.89 – 7.86 (m, 2H), 6.87 – 6.84 (m, 2H), 3.91 (t,  $J = 6.6$  Hz, 2H), 3.11 – 3.07 (m, 2H), 2.75 – 2.71 (m, 2H), 2.40 (s, 4H), 1.76 (h,  $J = 7.4$  Hz, 2H), 1.54 (p,  $J = 5.6$  Hz, 4H), 1.41 – 1.38 (m, 2H), 0.98 (t,  $J = 7.4$  Hz, 3H);  $^{13}\text{C}$  NMR (100 MHz,  $\text{CDCl}_3$ )  $\delta$  198.0, 163.2, 130.4, 129.9, 114.2, 69.8, 54.7, 54.2, 36.0, 26.0, 24.4, 22.5, 10.6; HRMS (ESI)  $m/z$   $[\text{M}+\text{H}]^+$ : Calcd for  $\text{C}_{17}\text{H}_{26}\text{NO}_2$ : 276.1964. Found: 276.1967.

# $^1\text{H}$ and $^{13}\text{C}$ NMR spectra of ynones

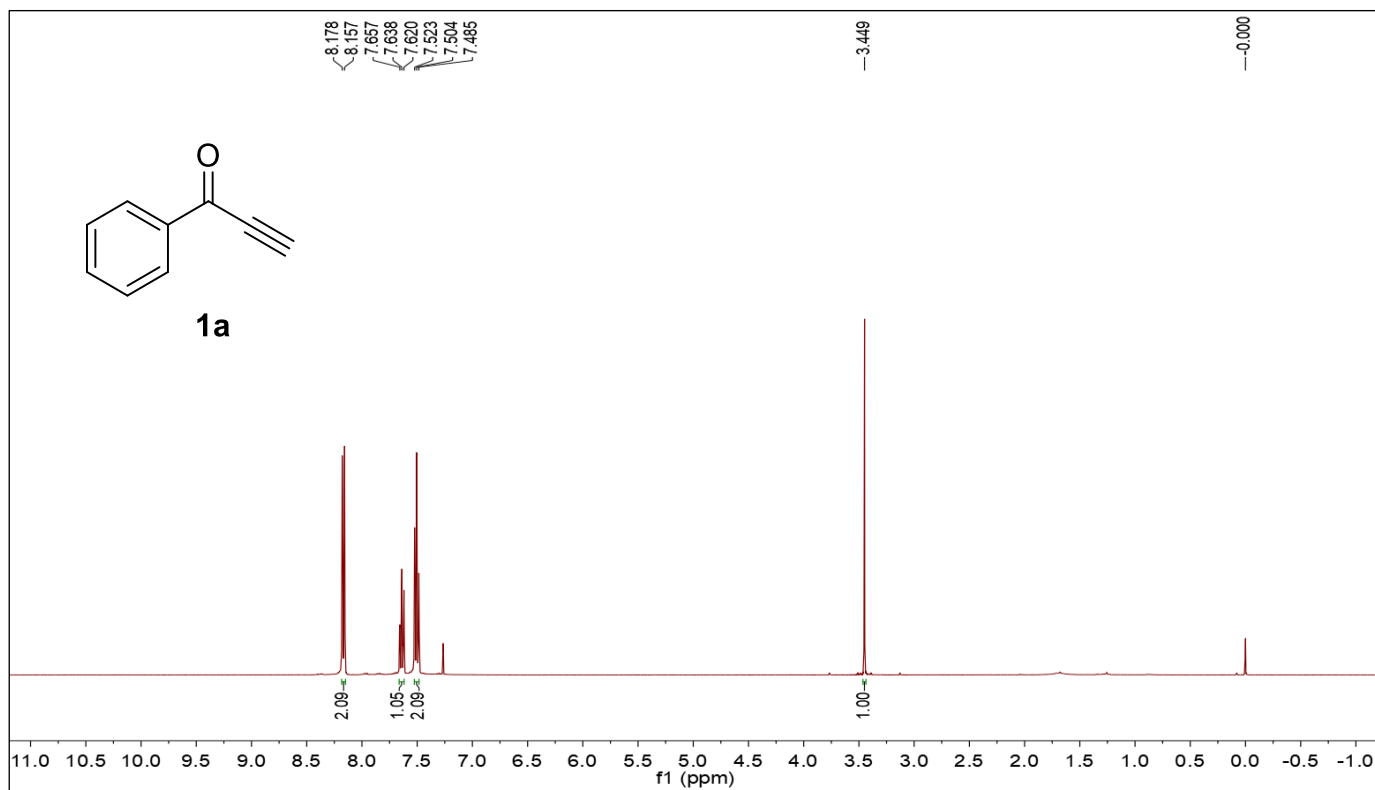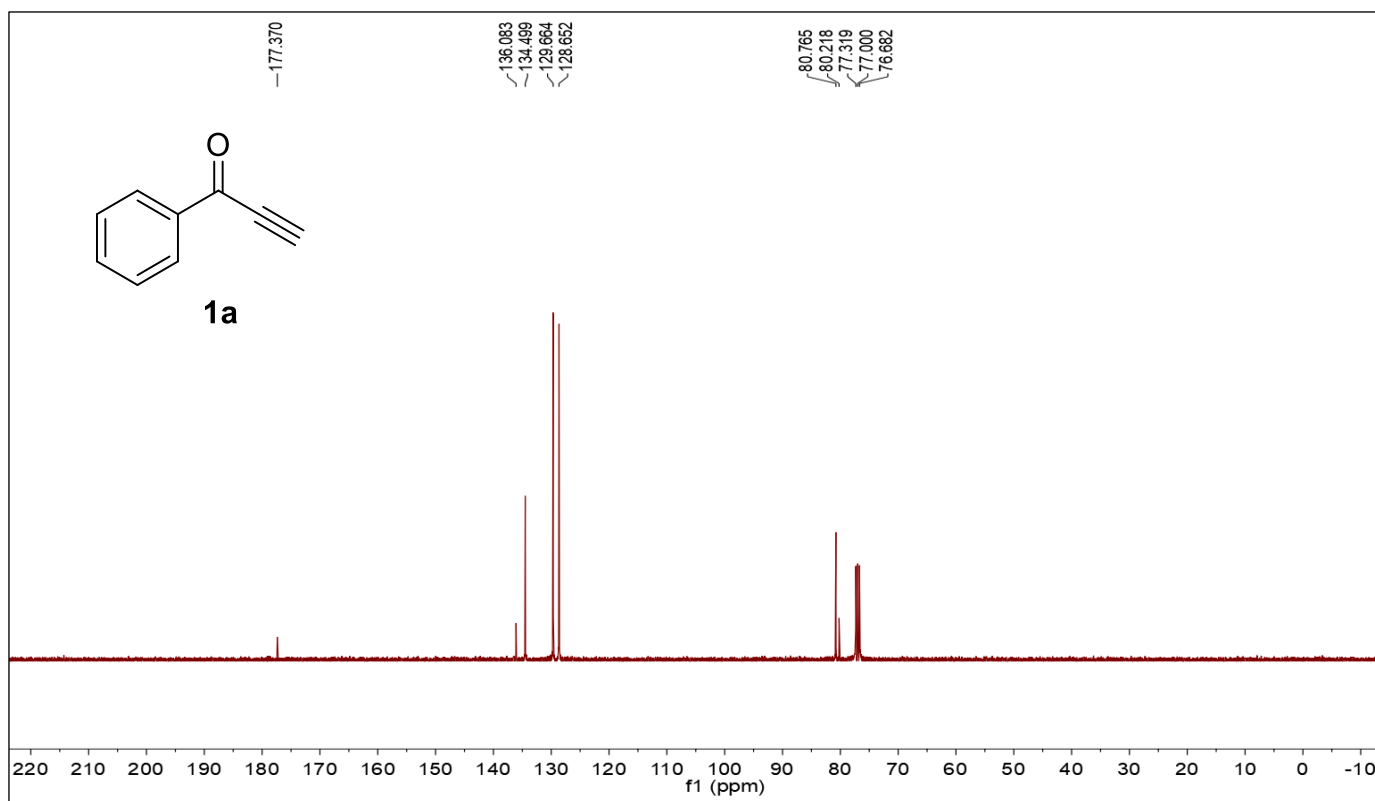



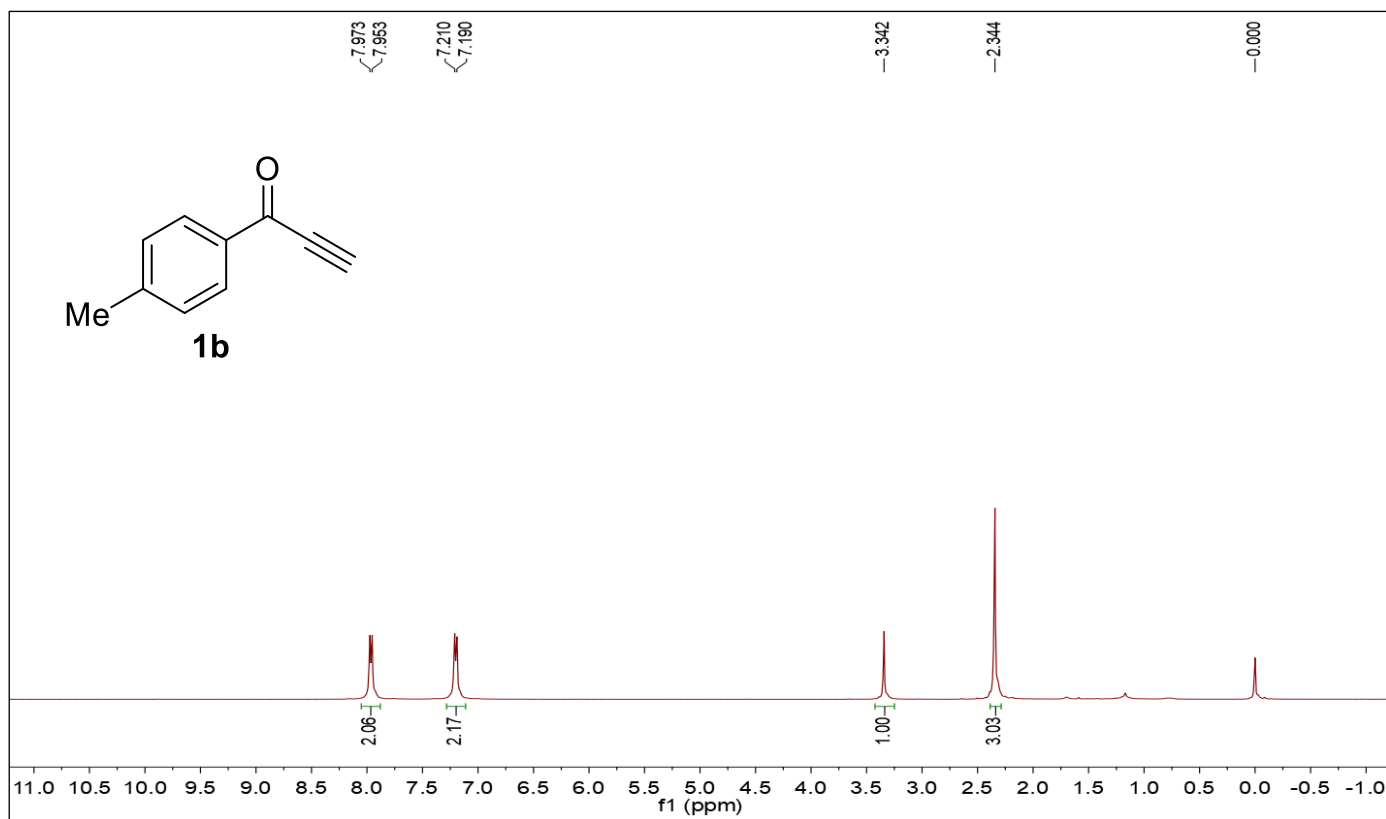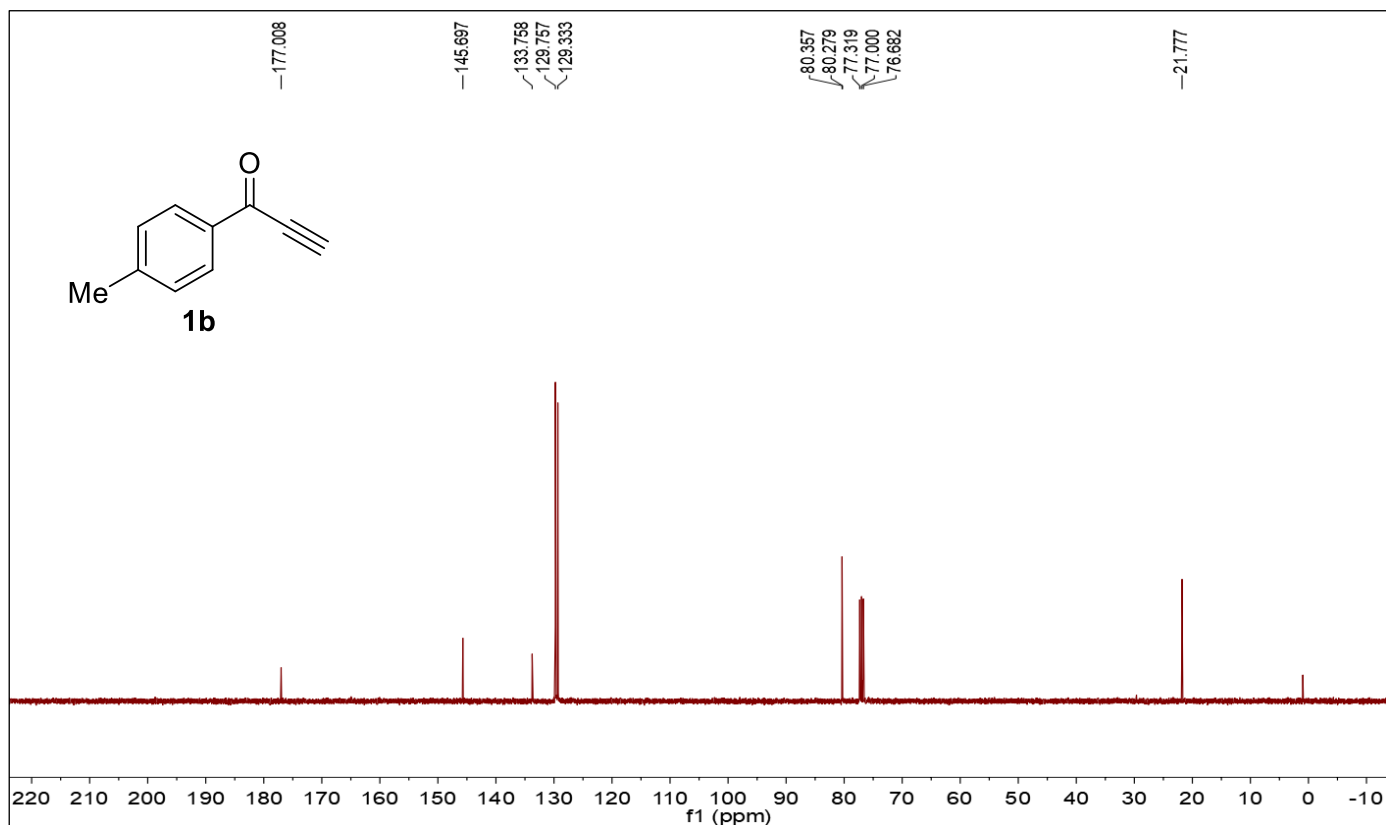

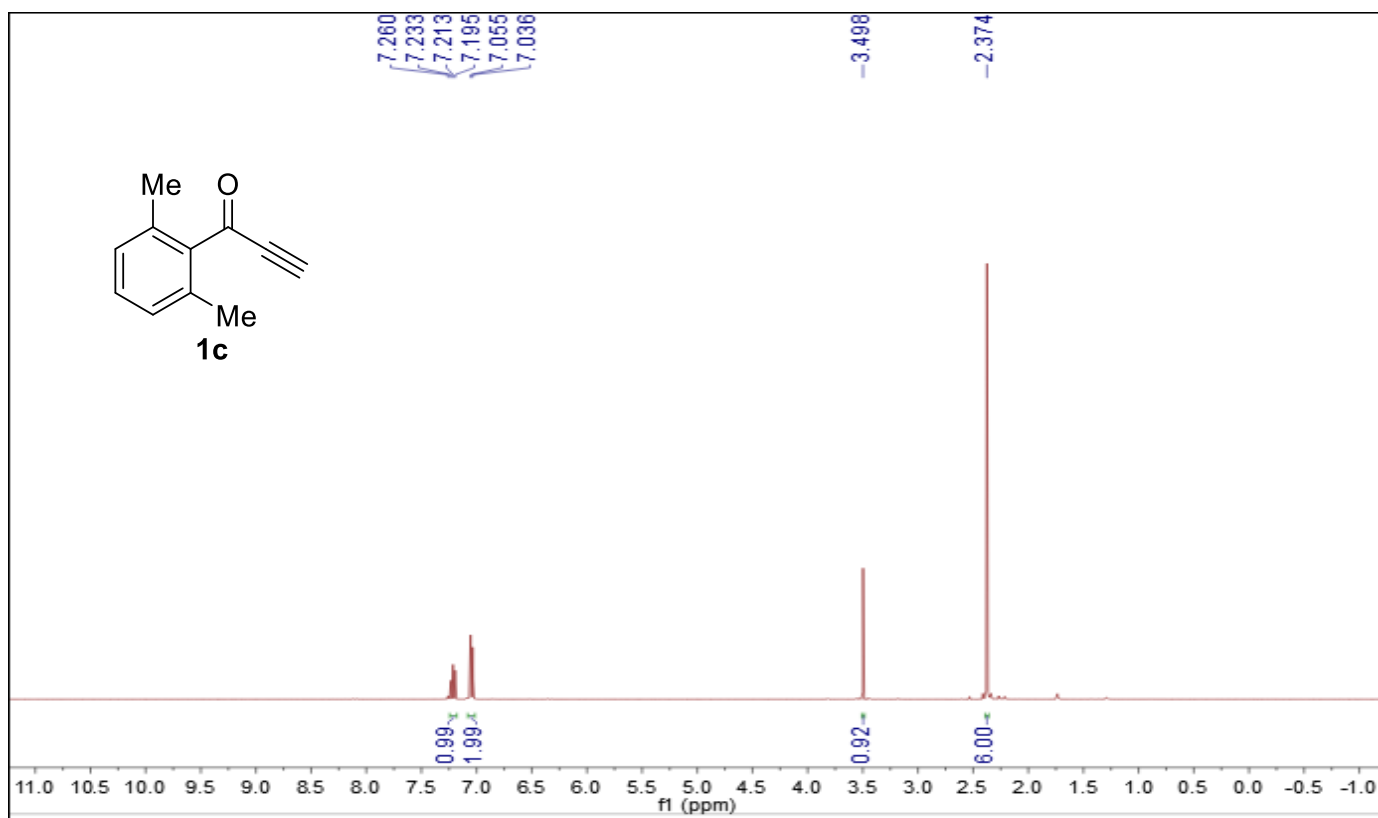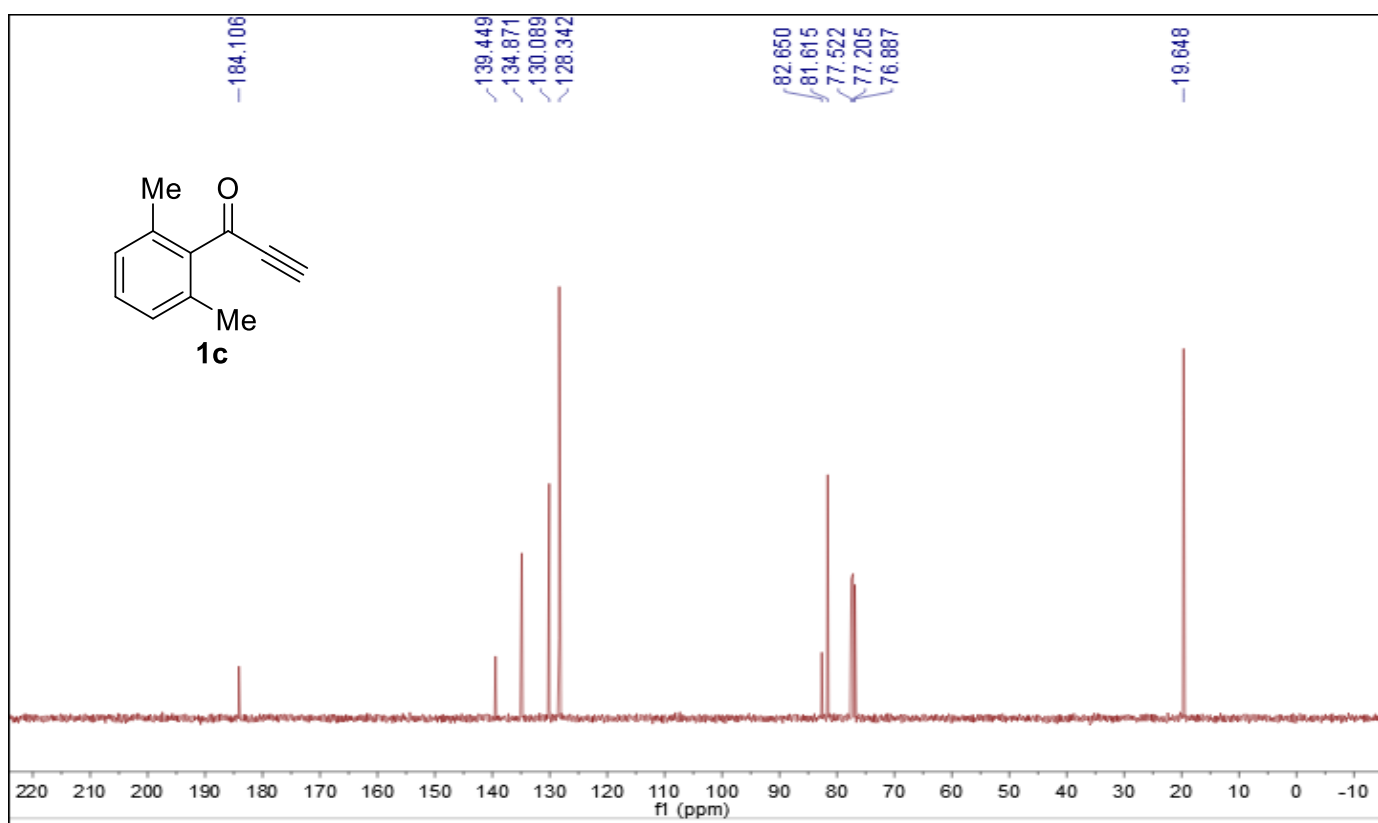

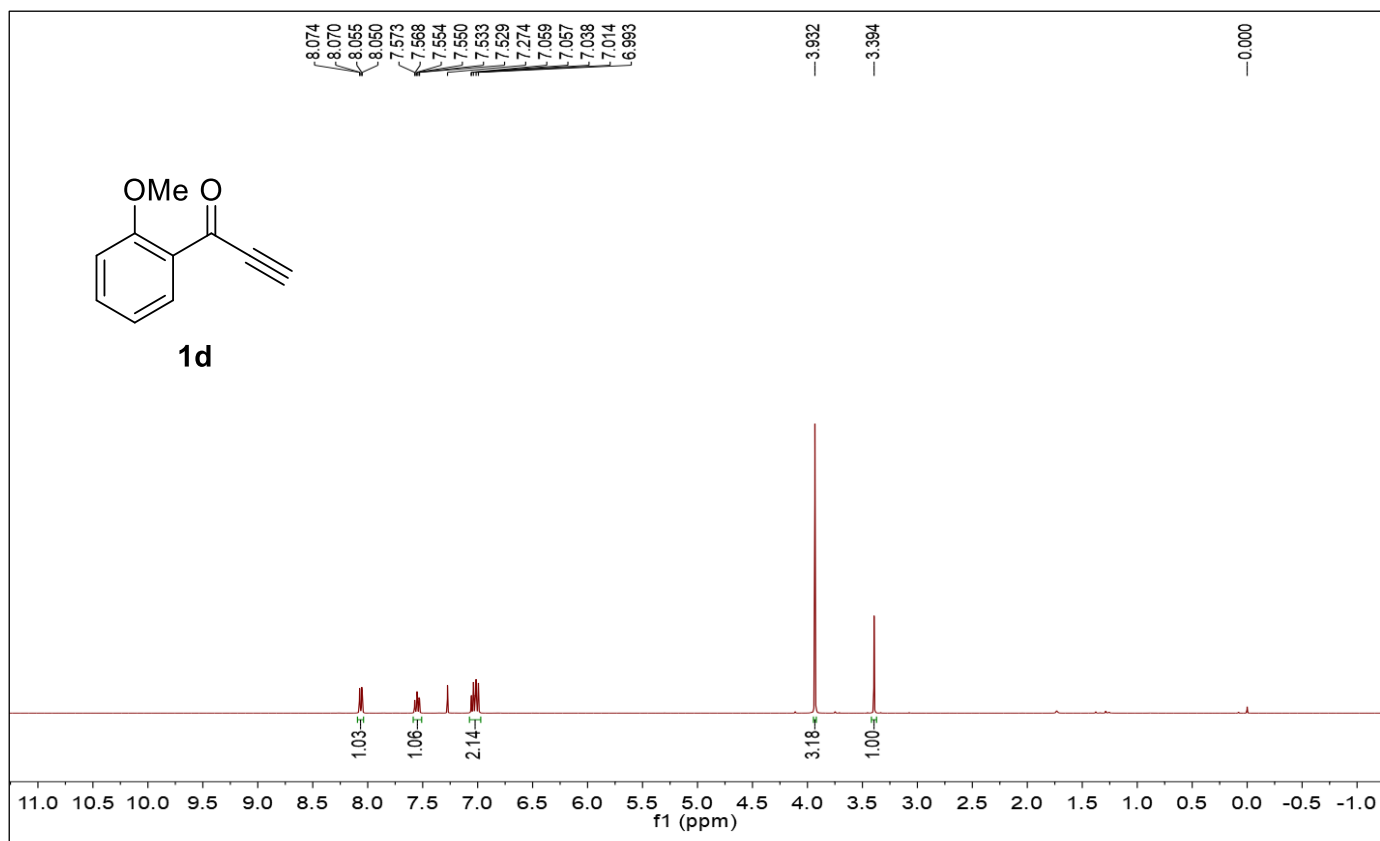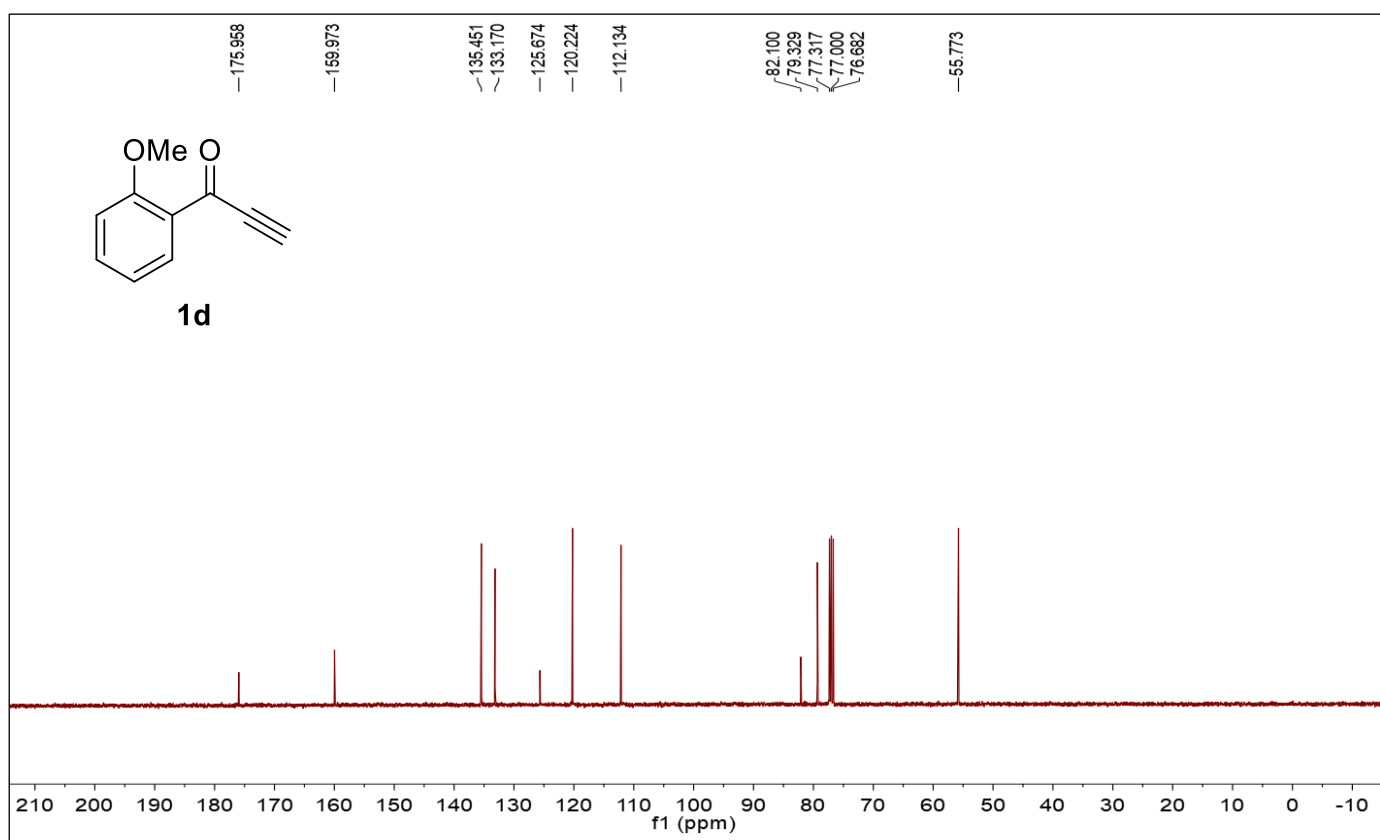

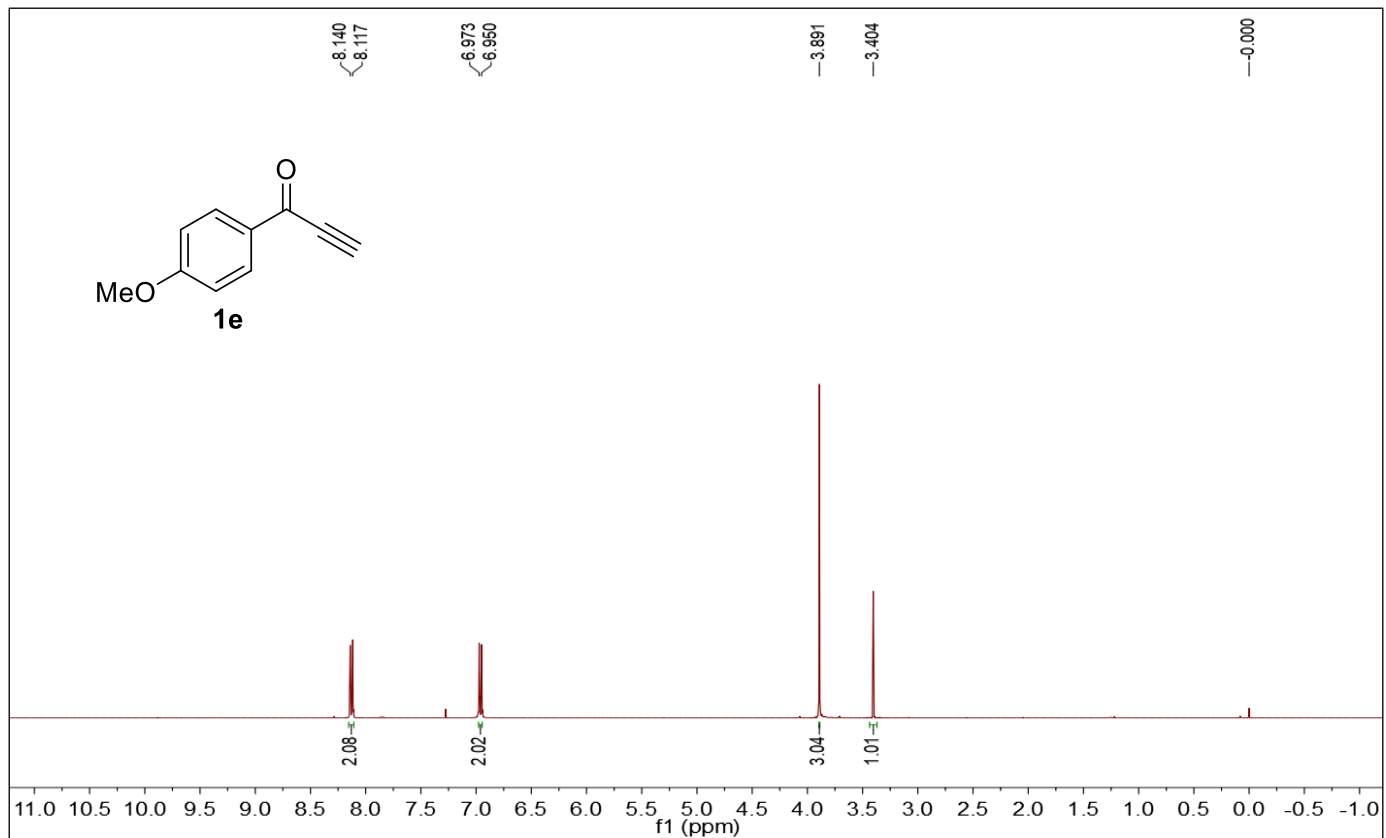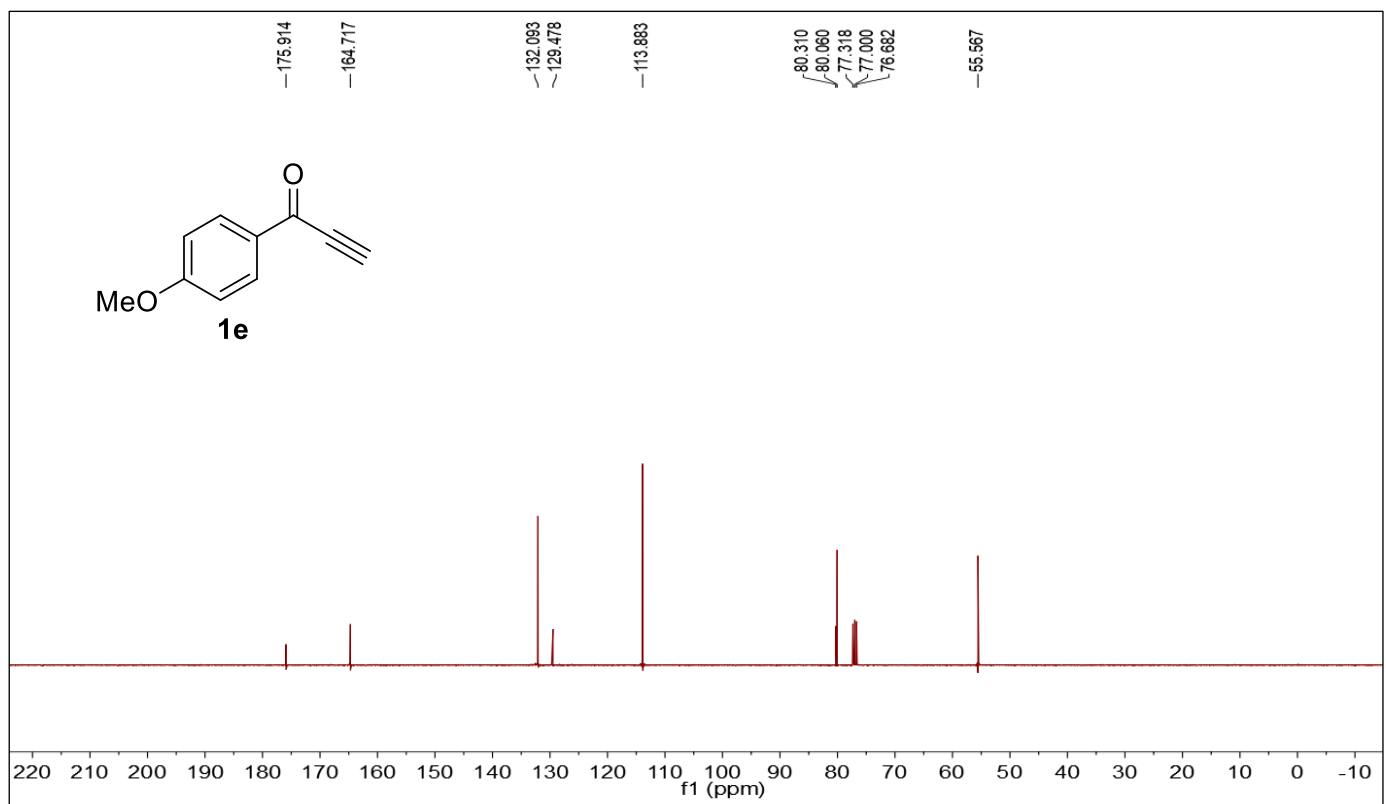

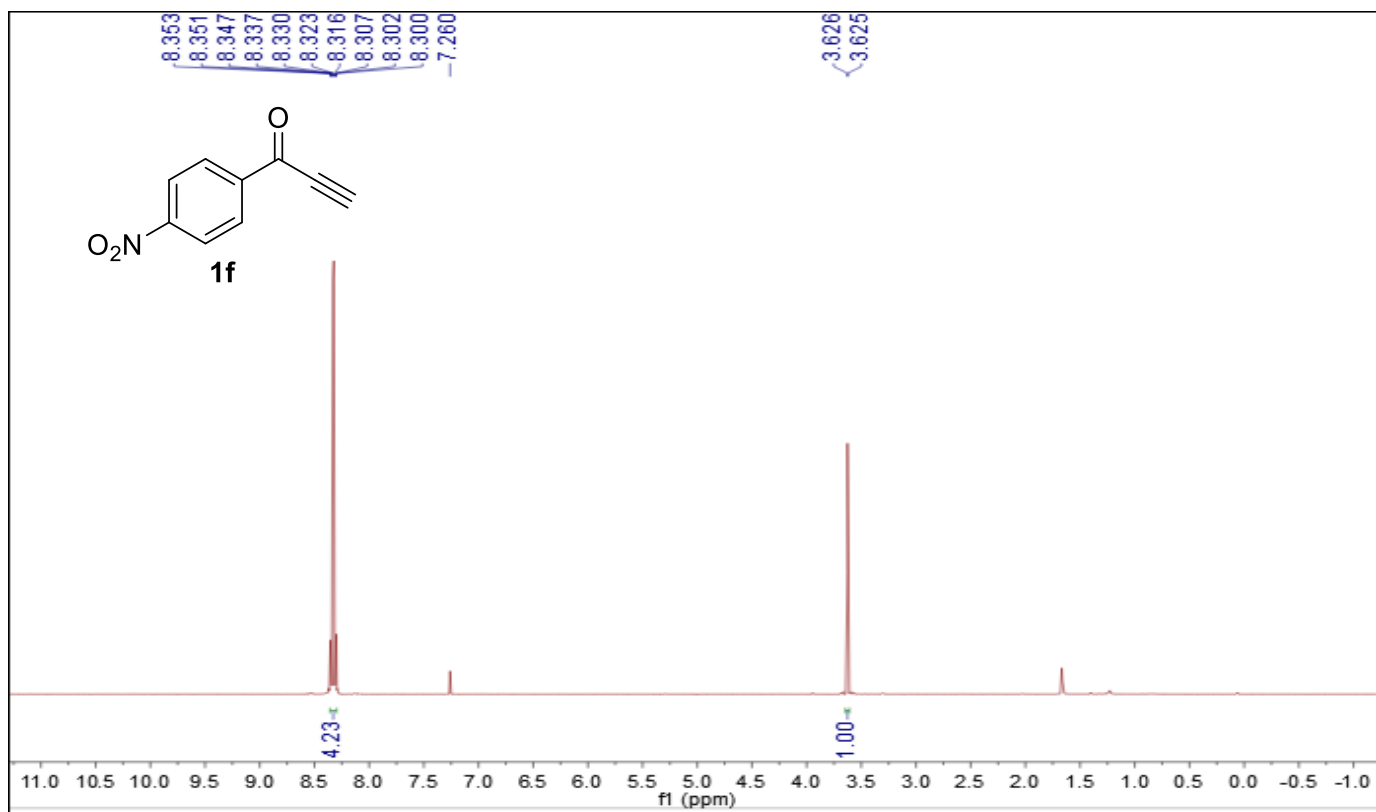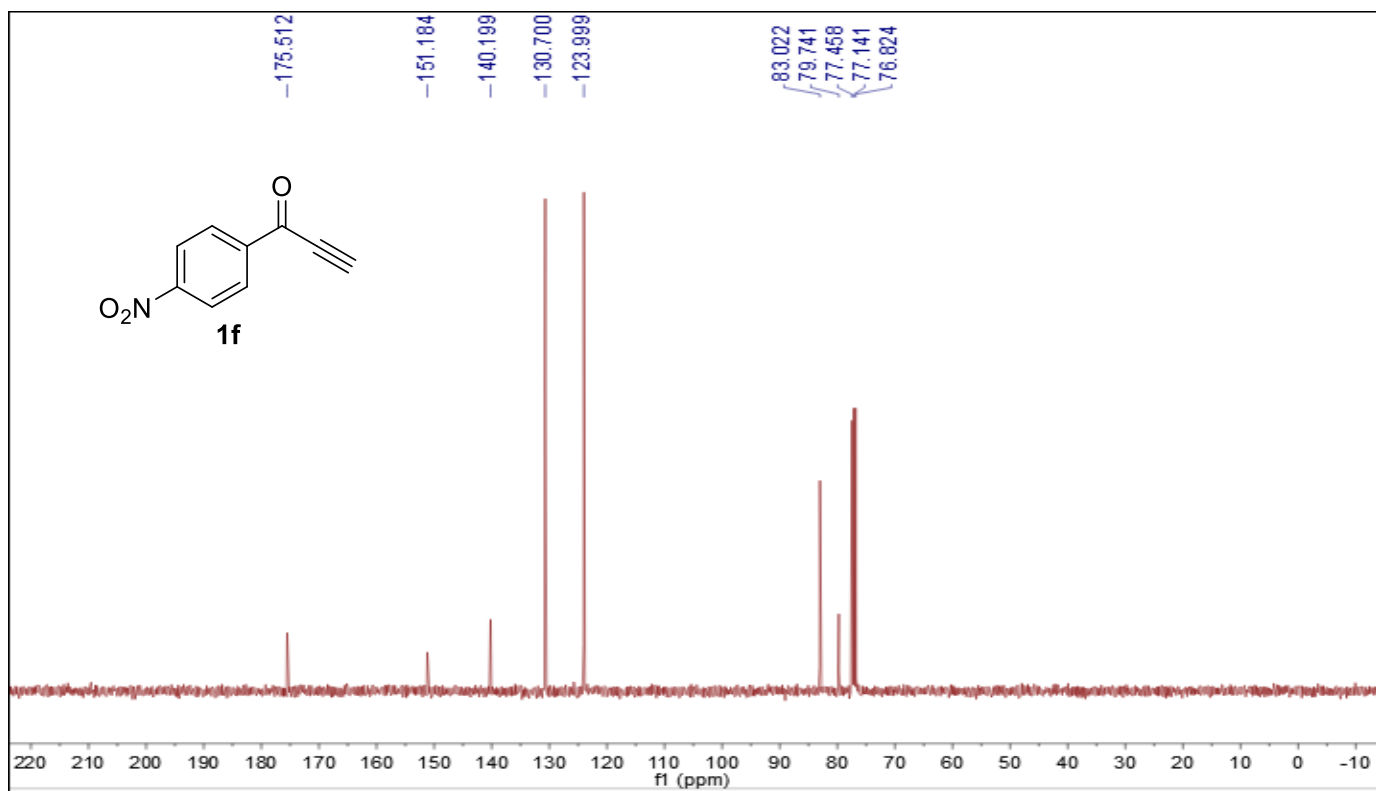

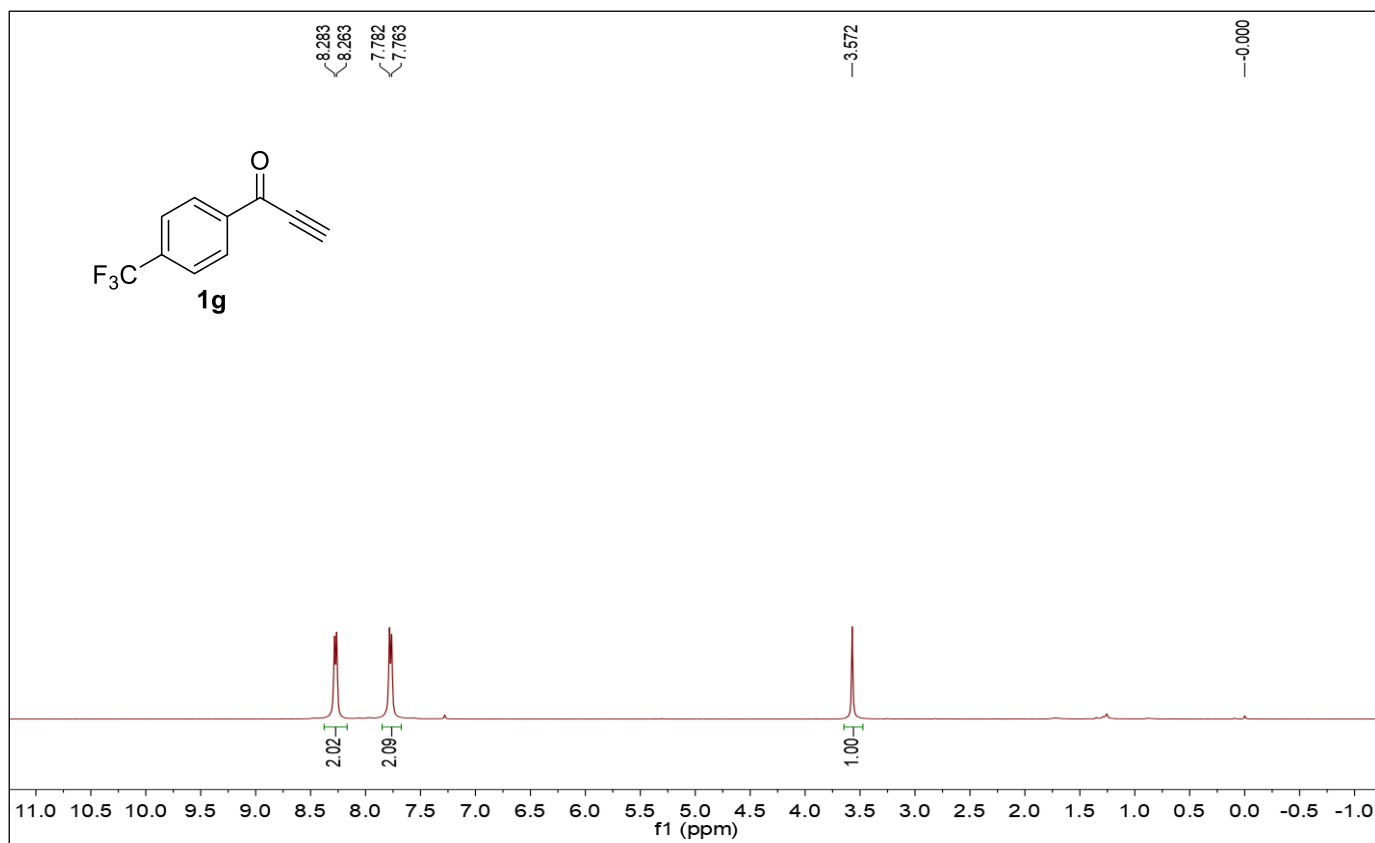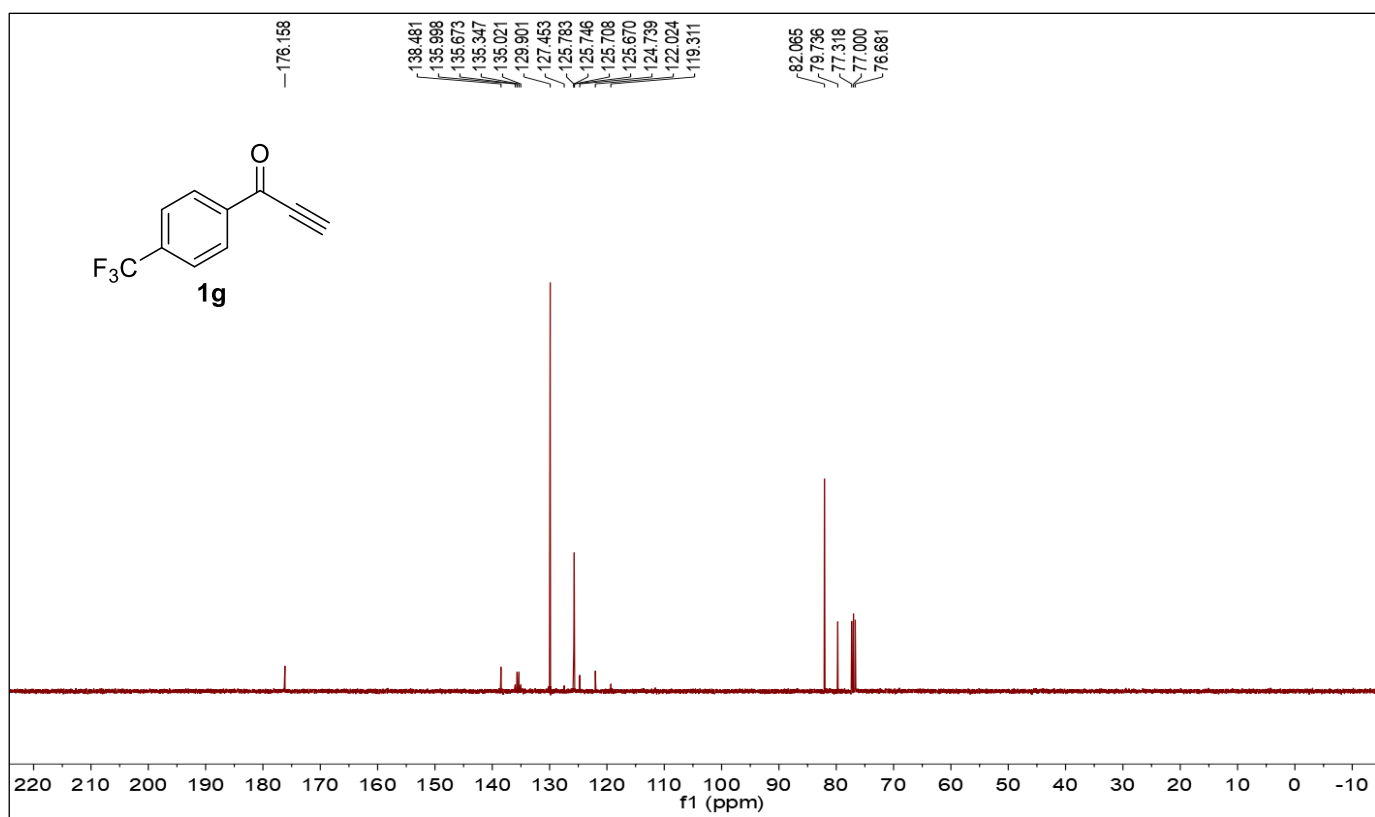

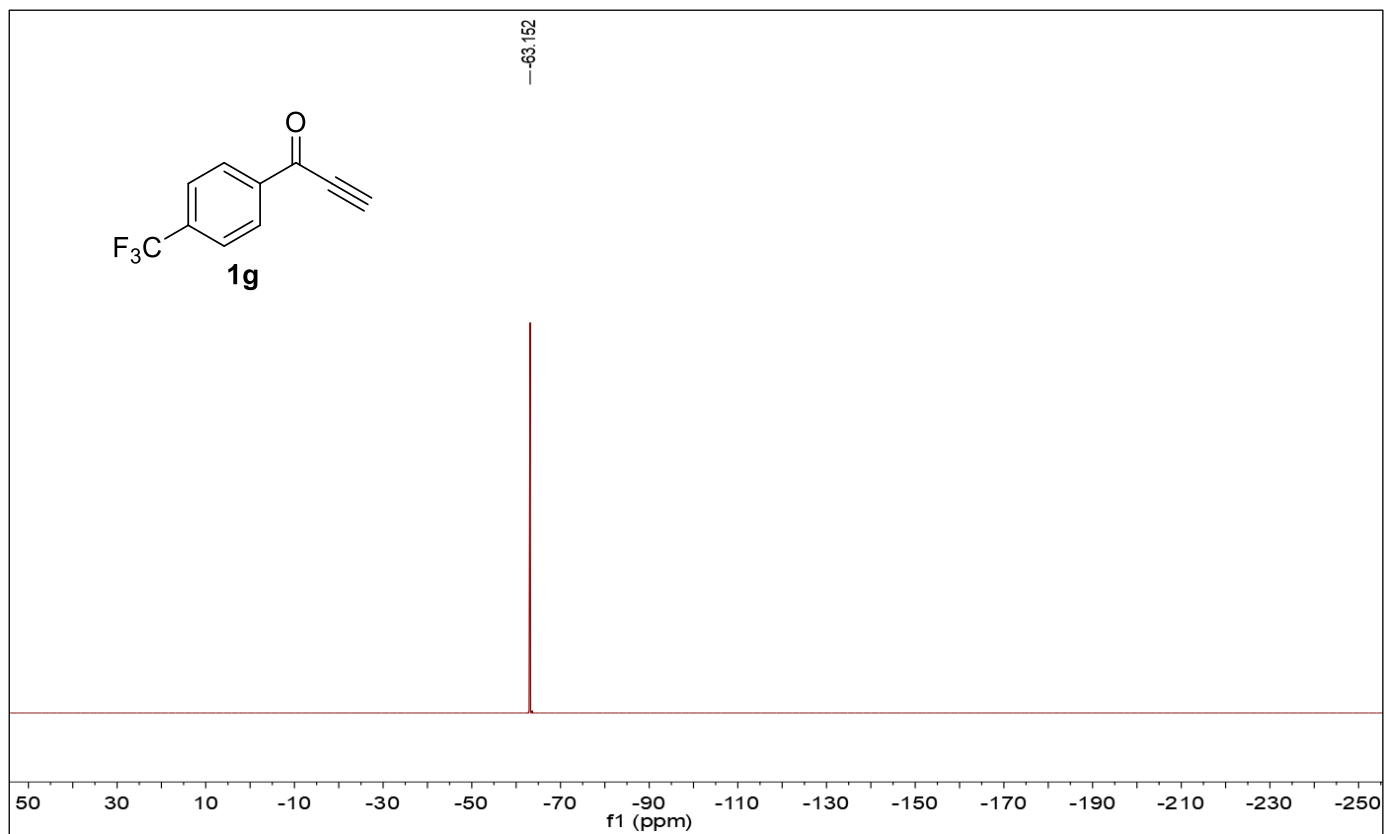

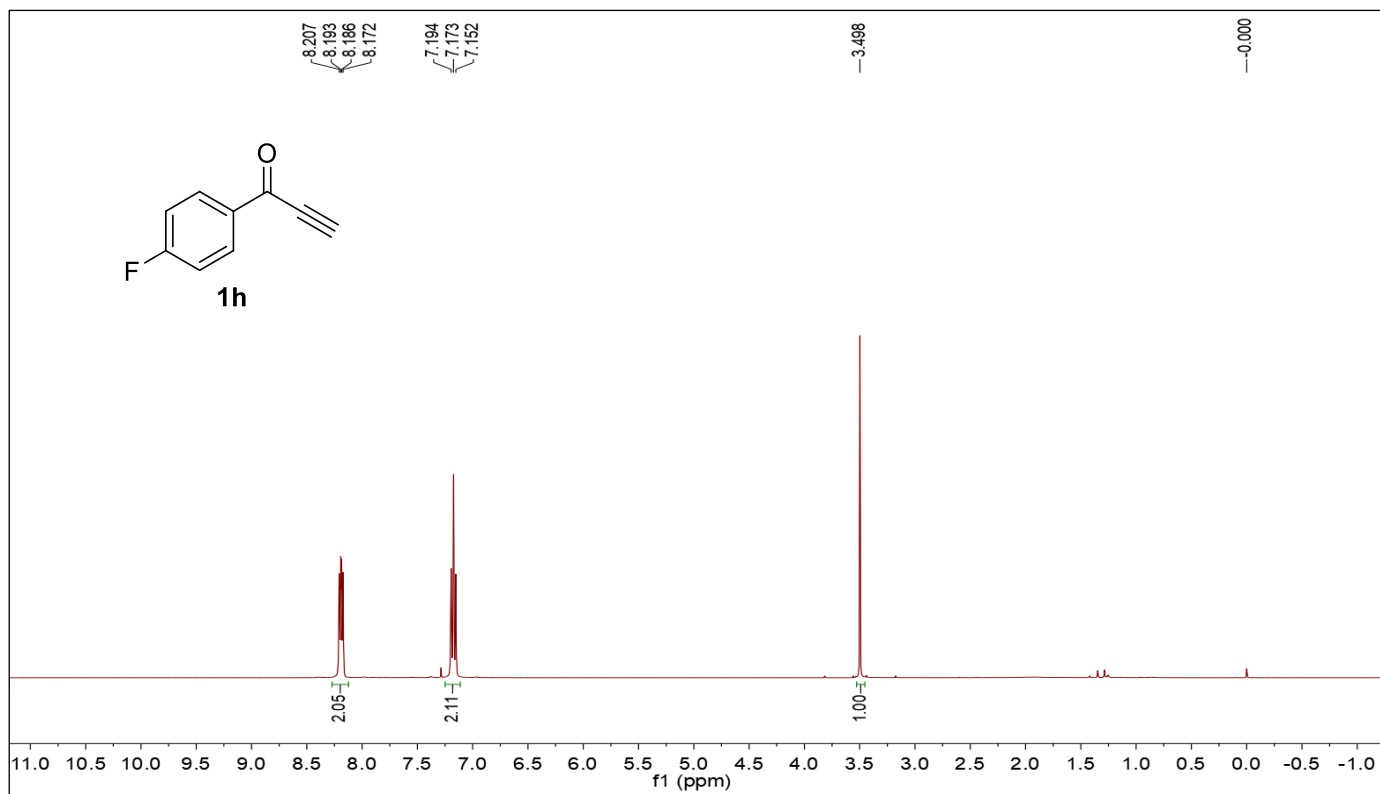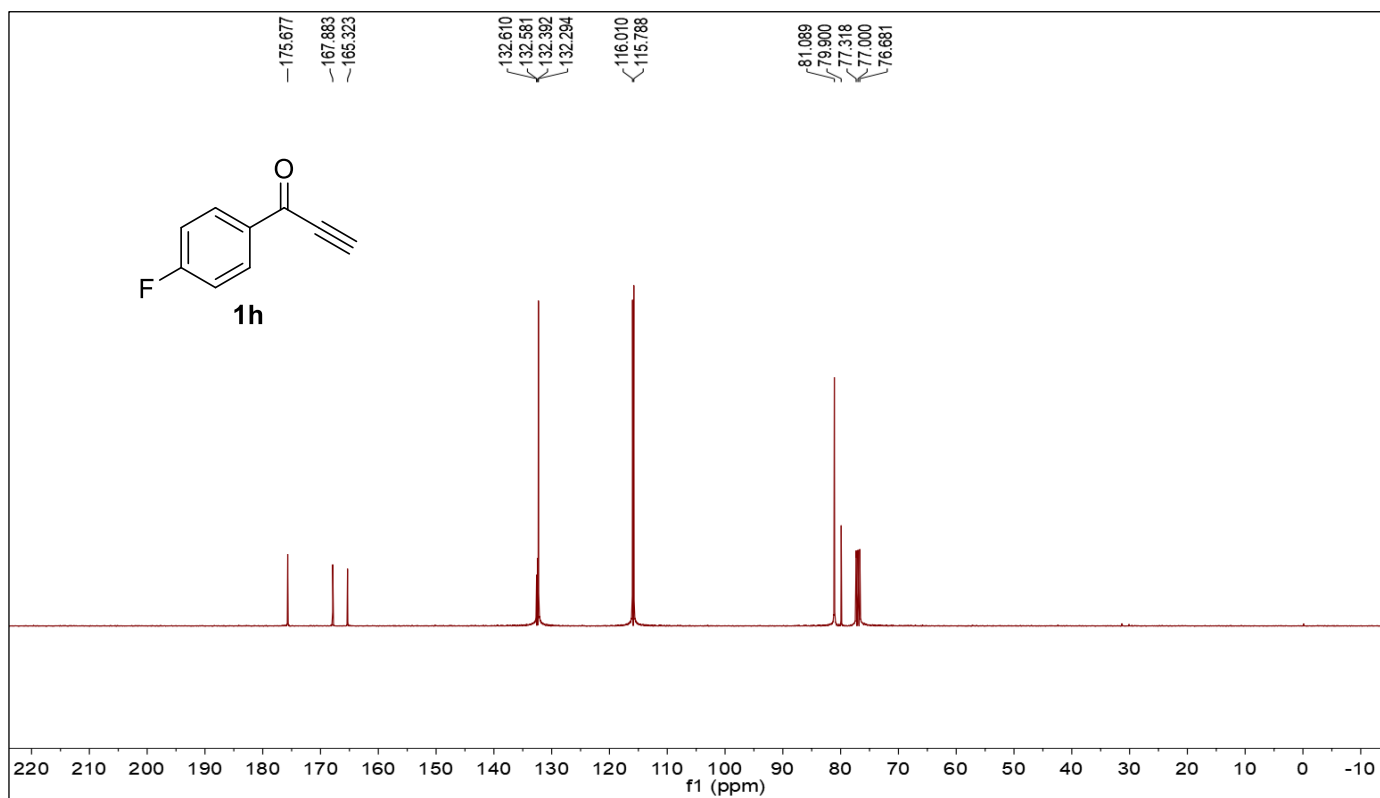



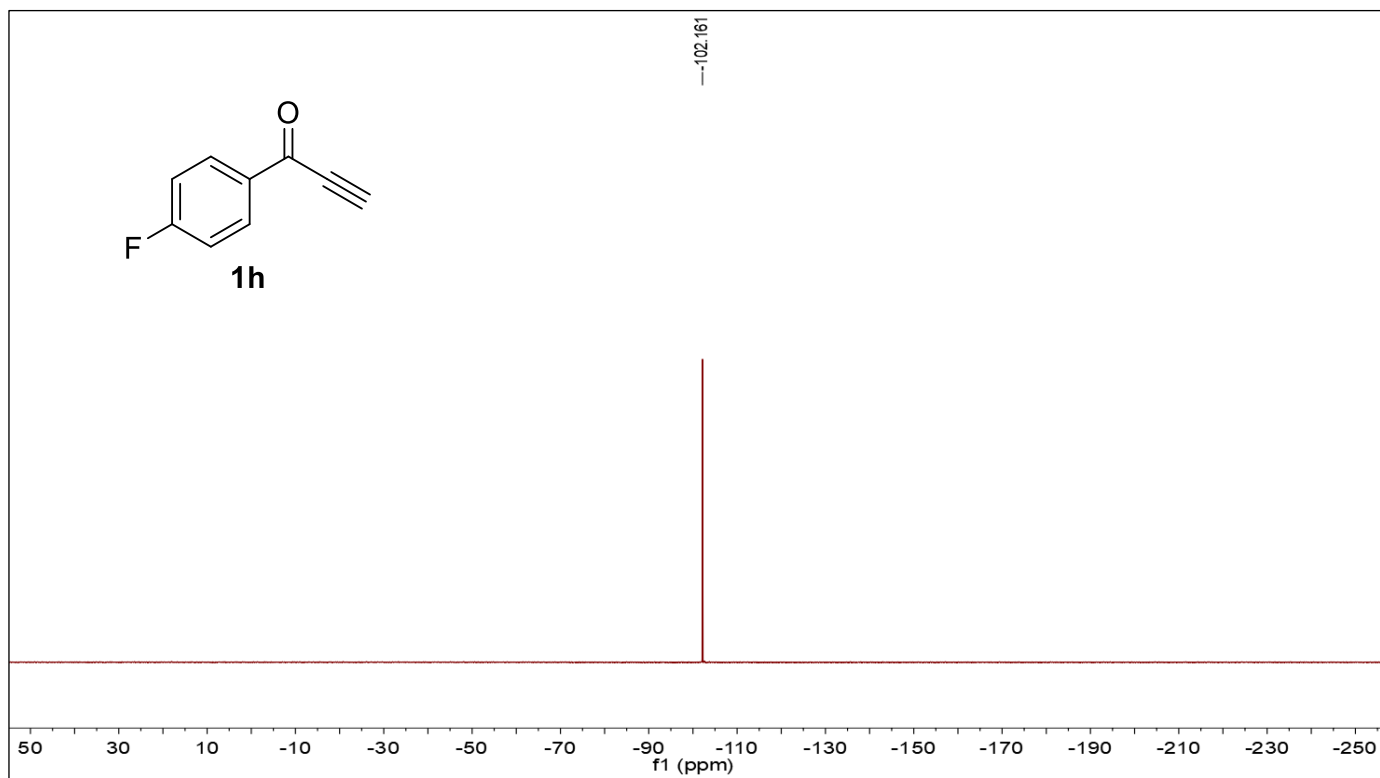

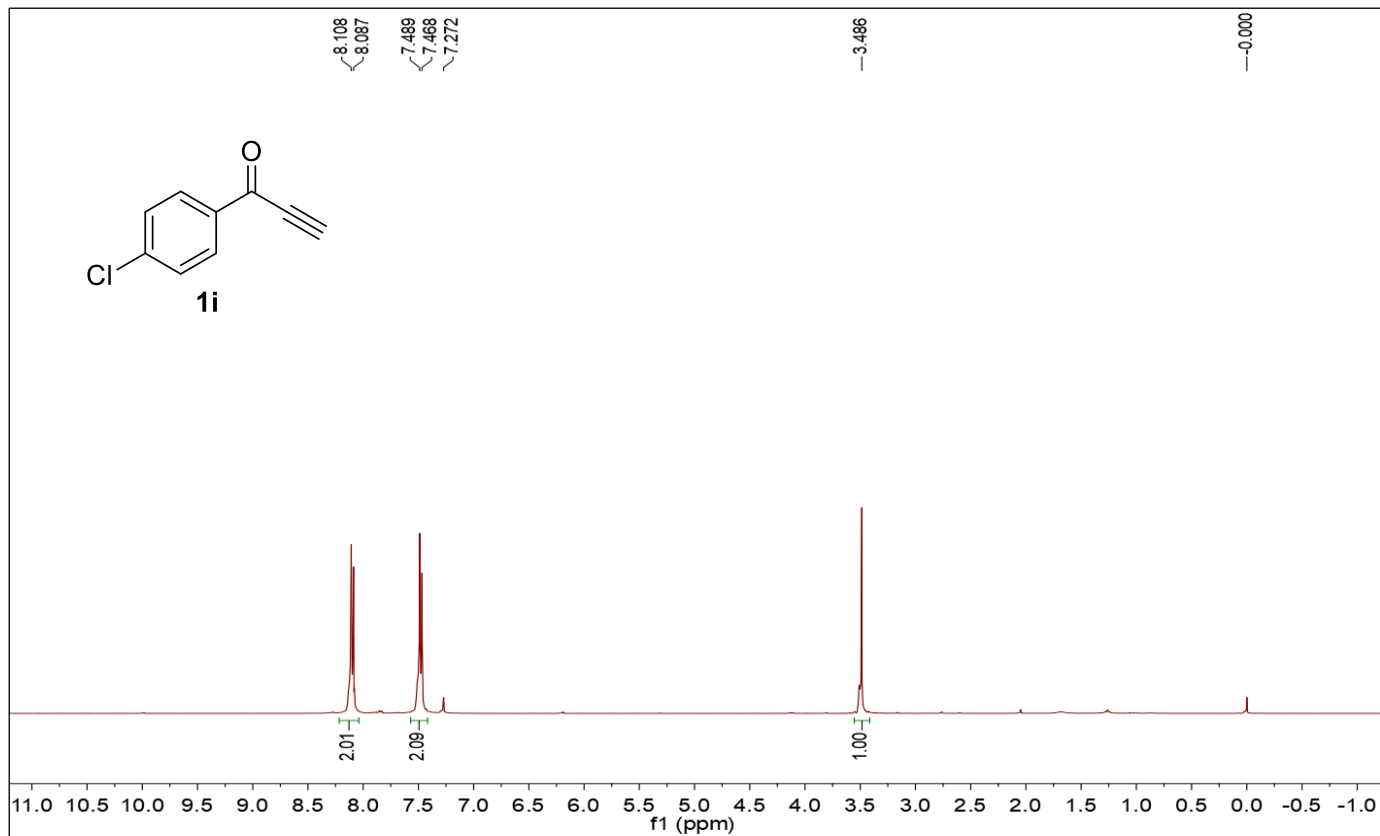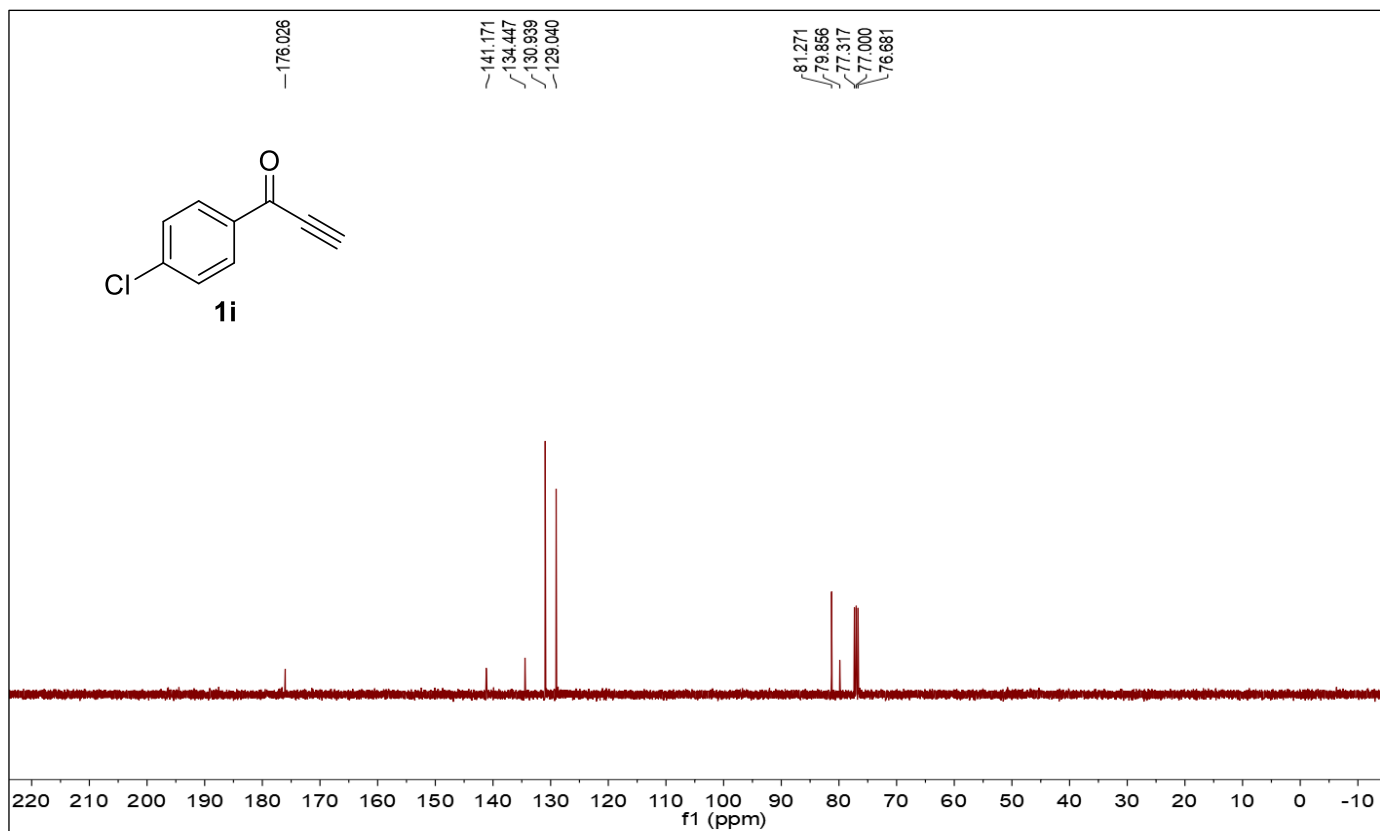

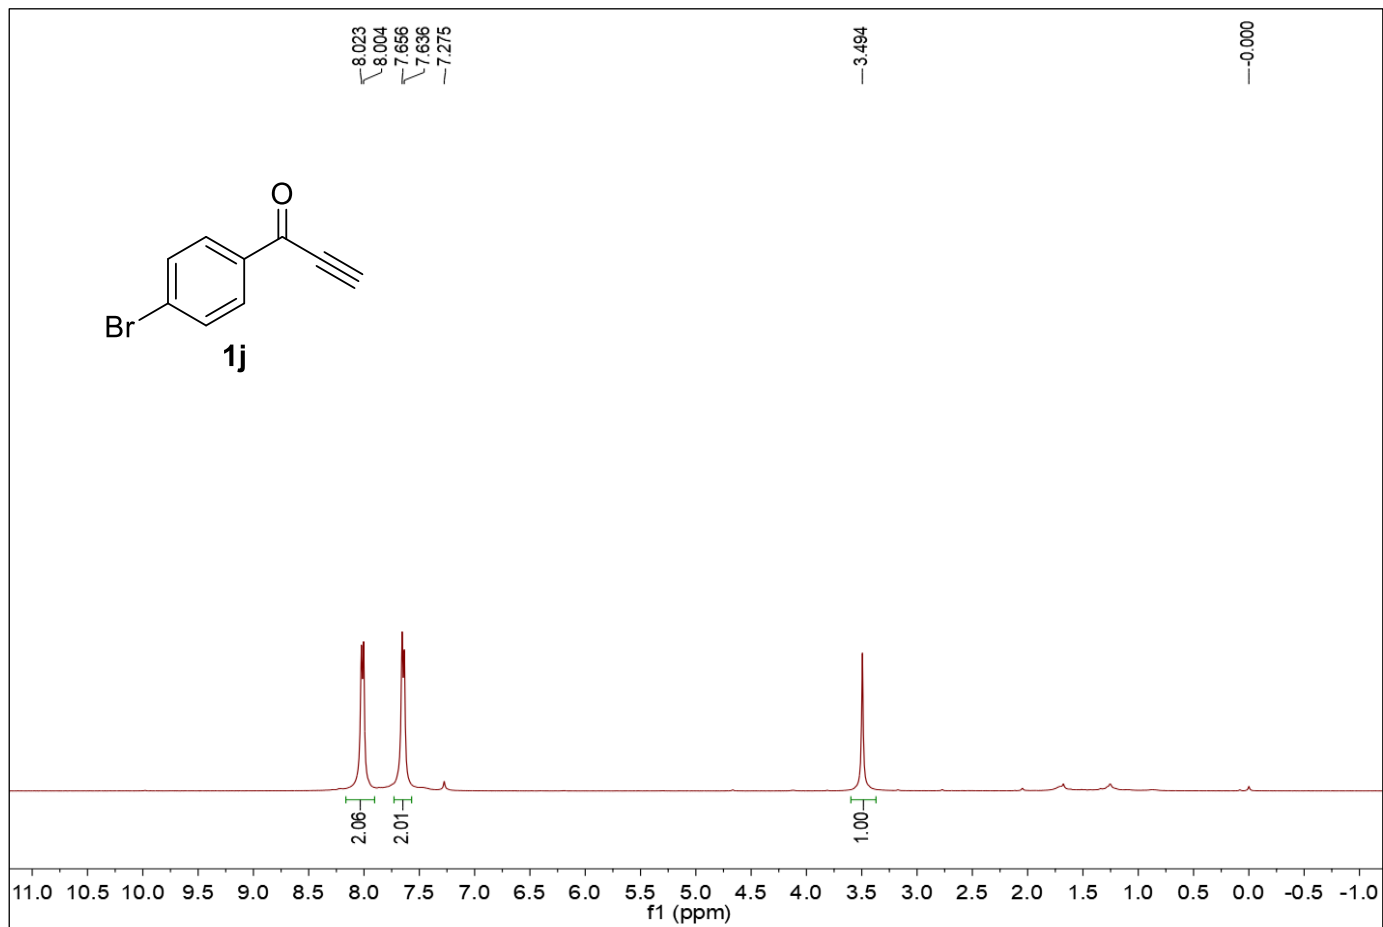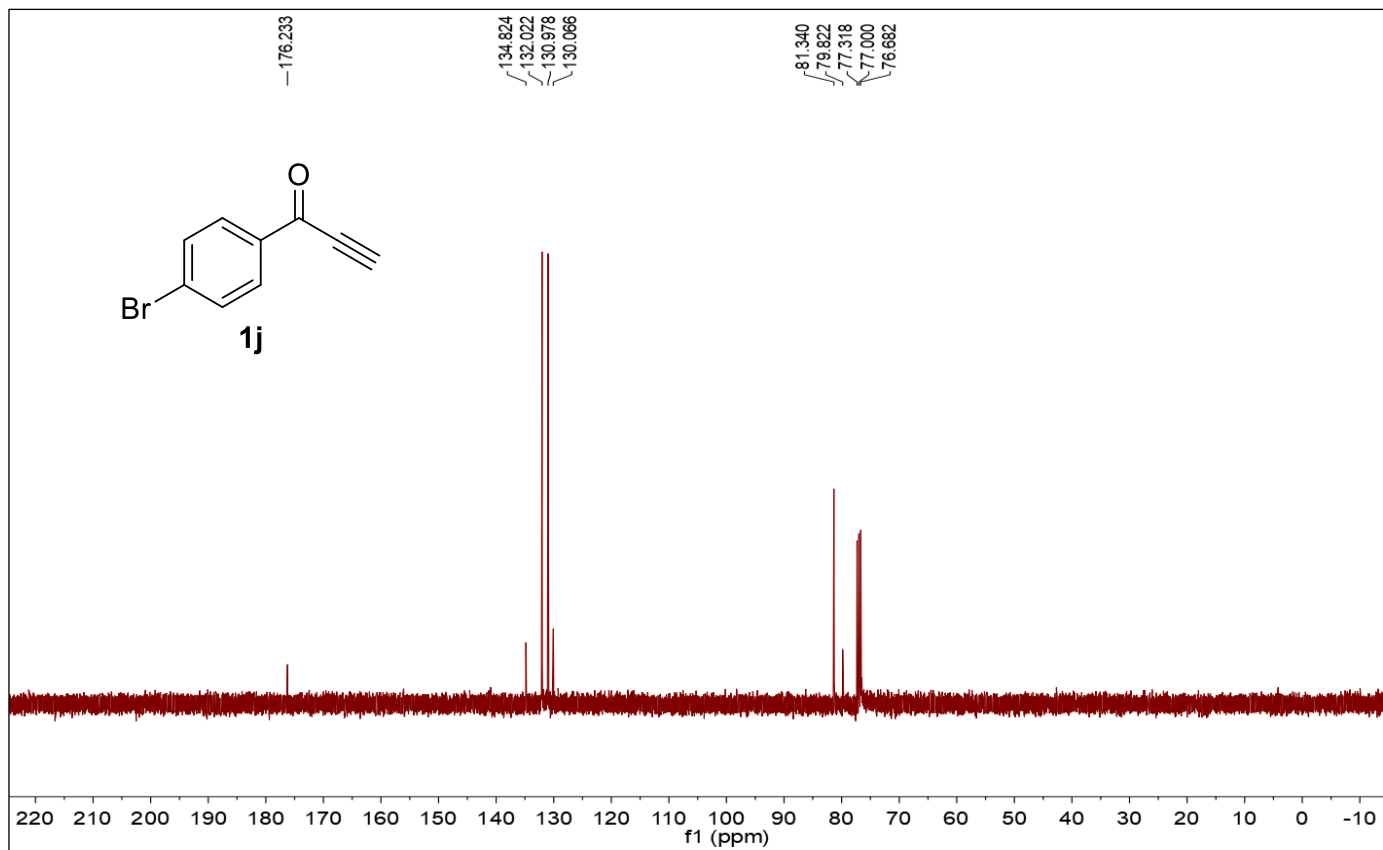

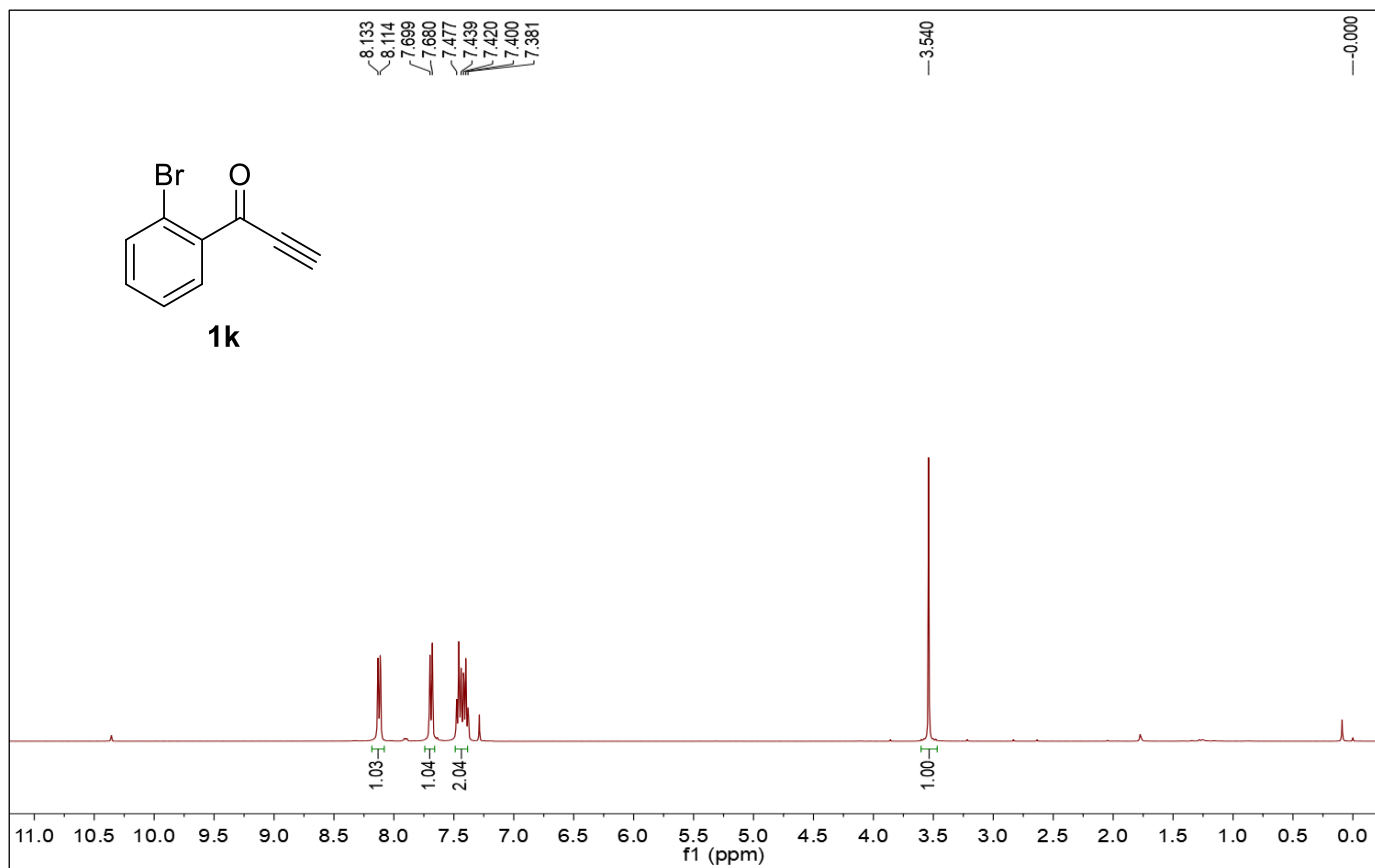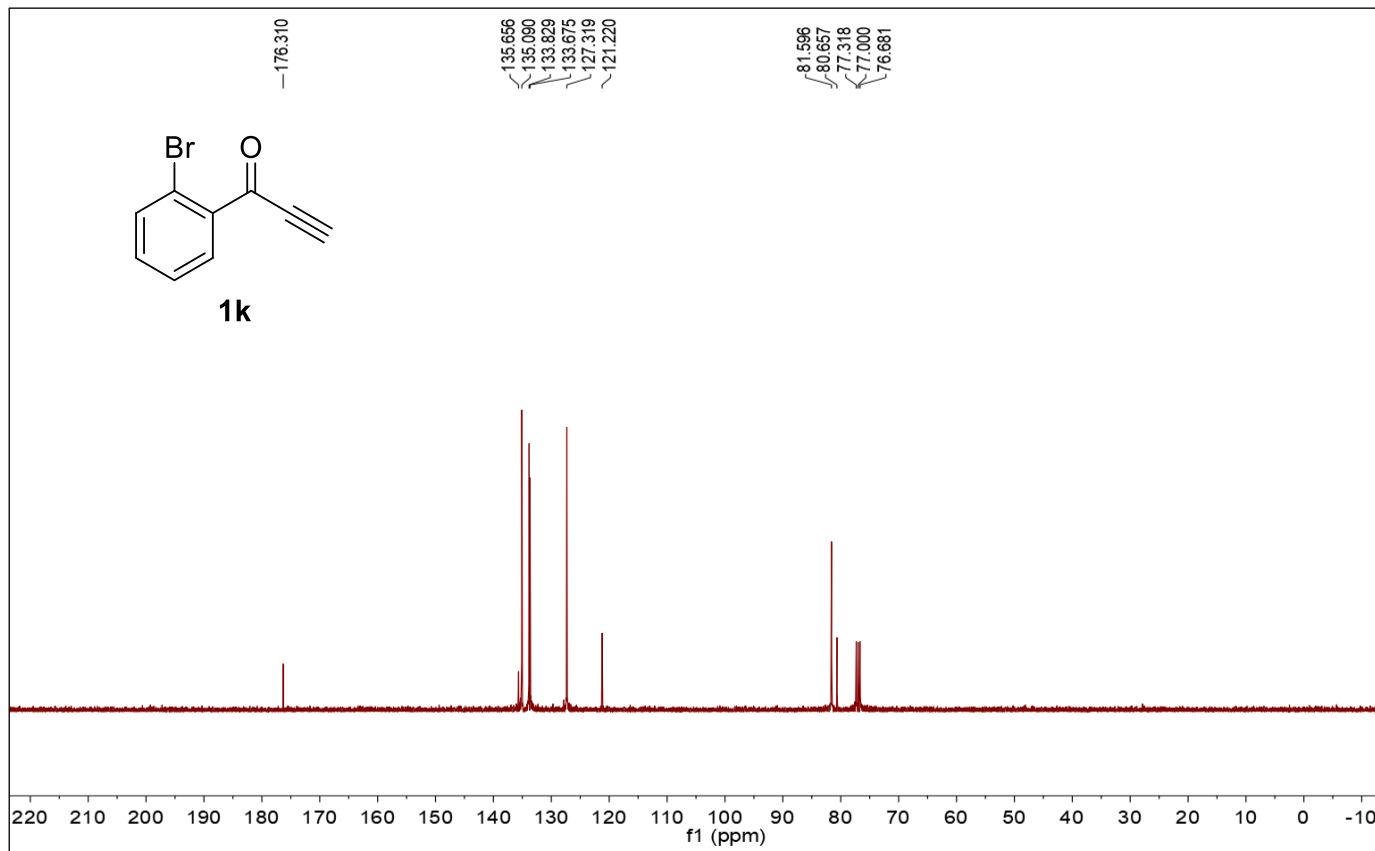

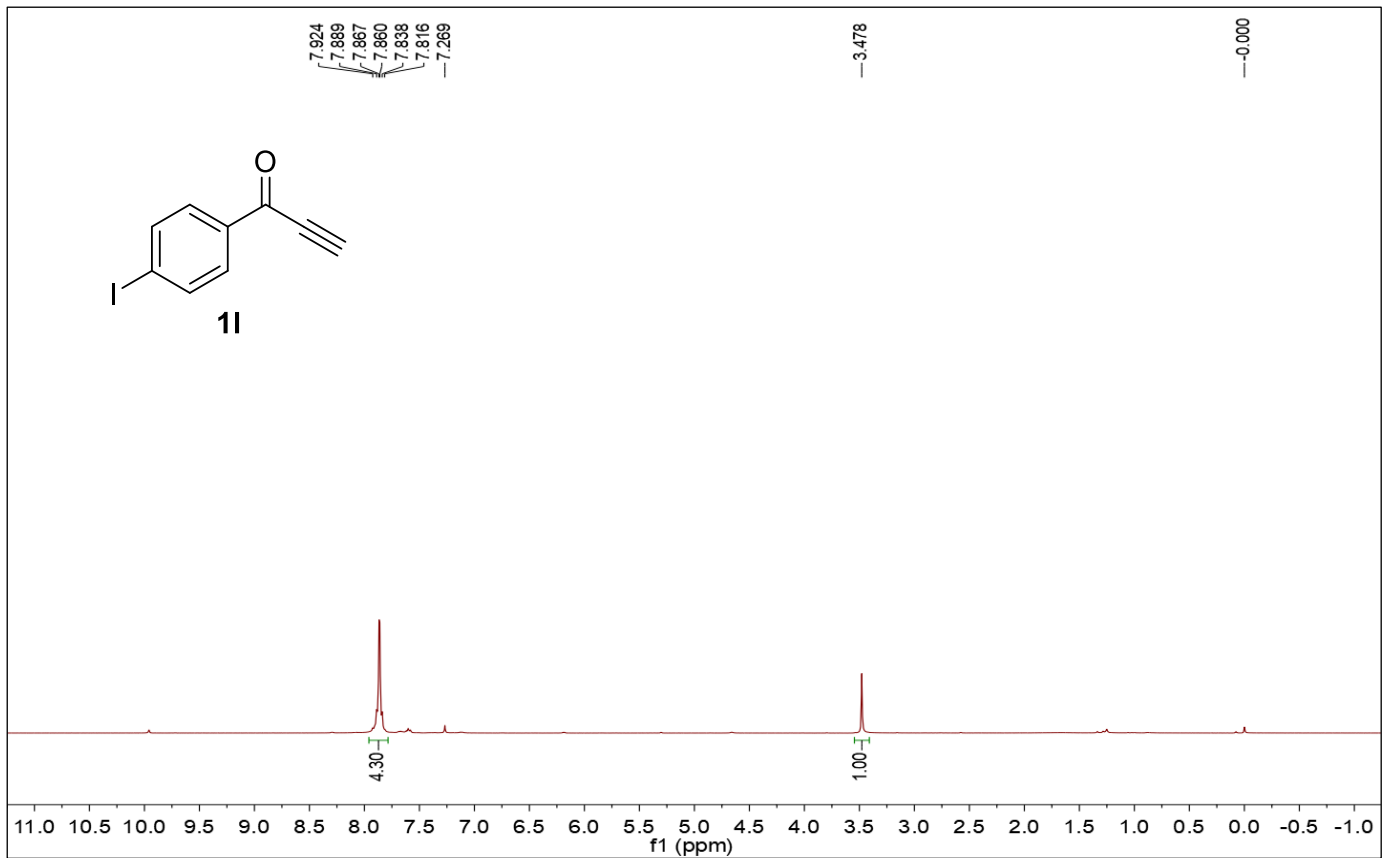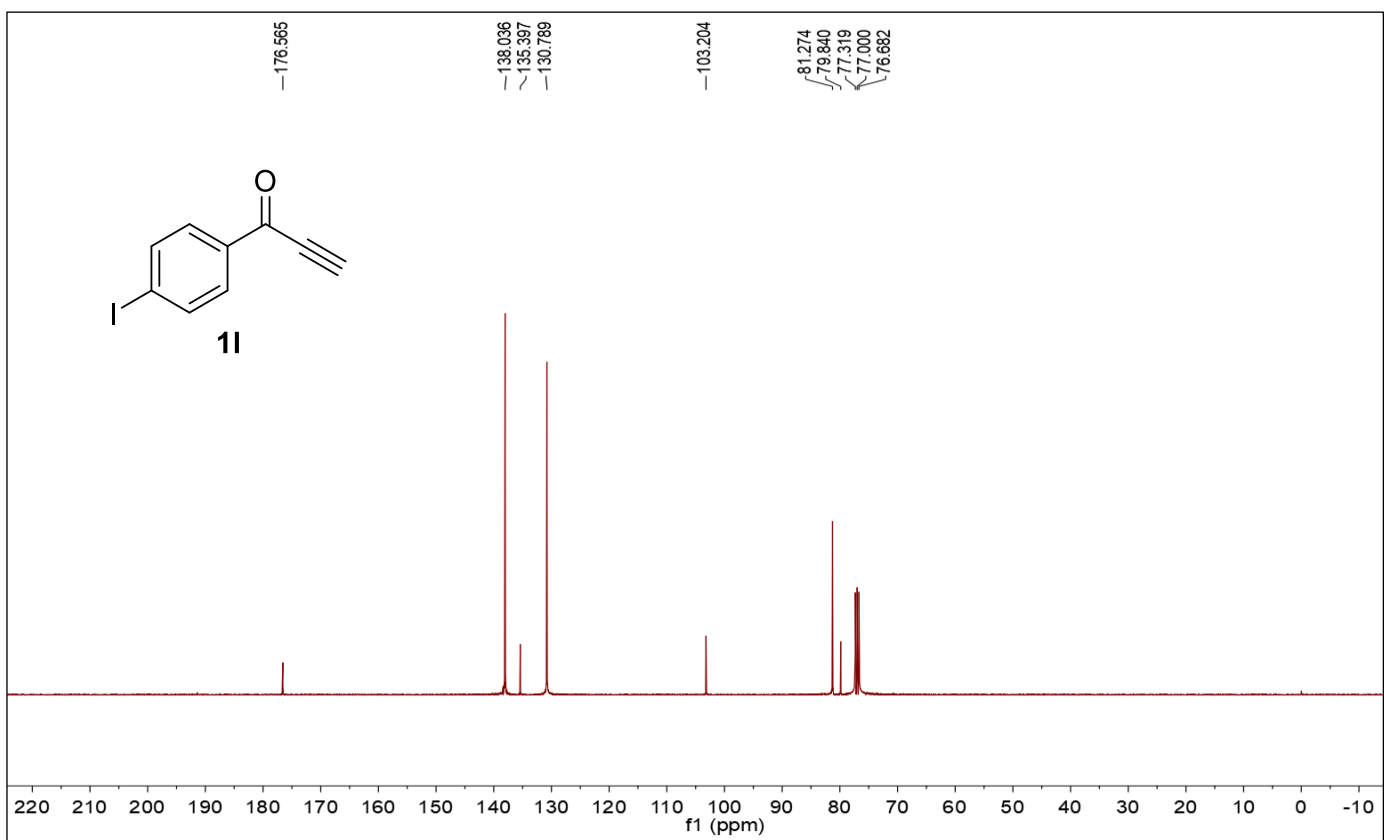

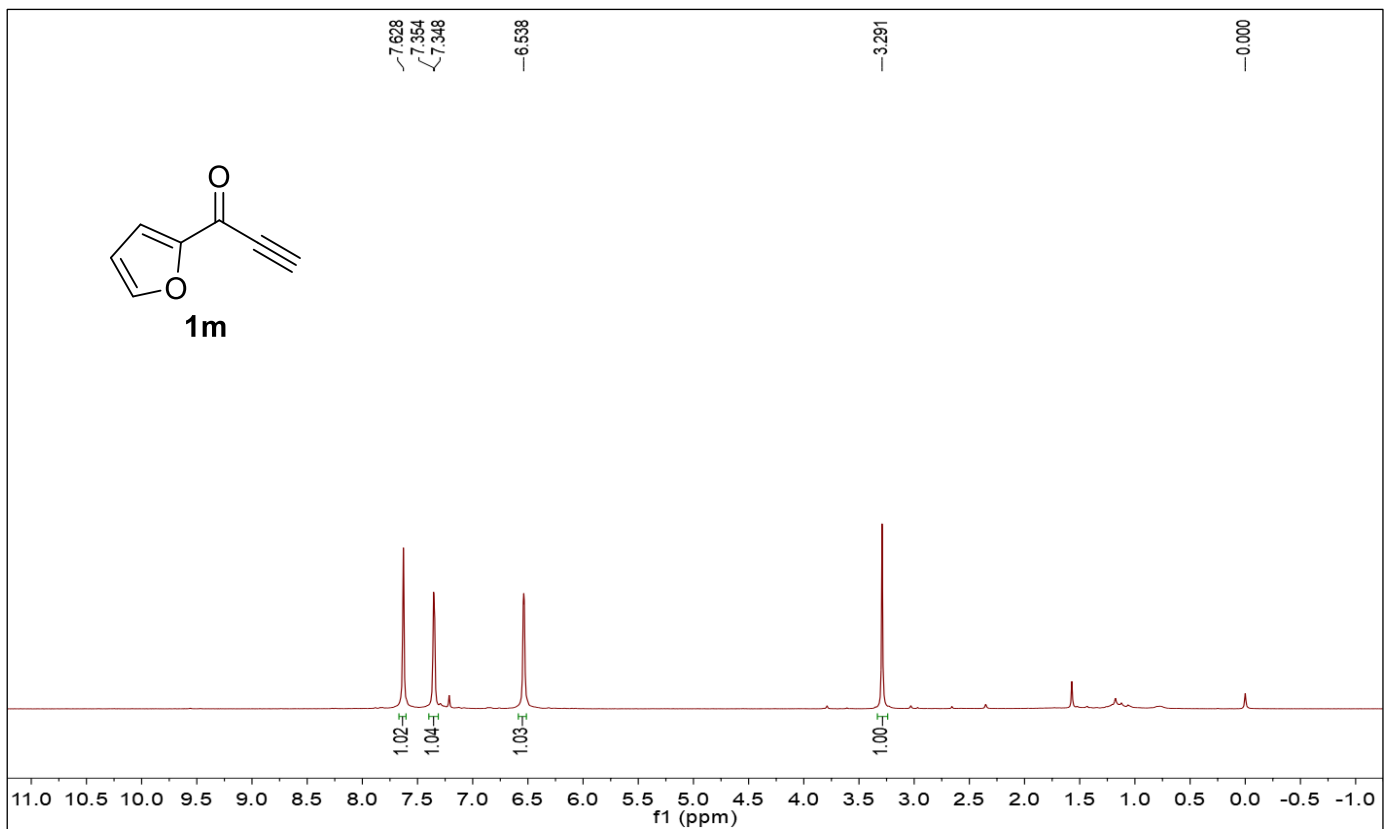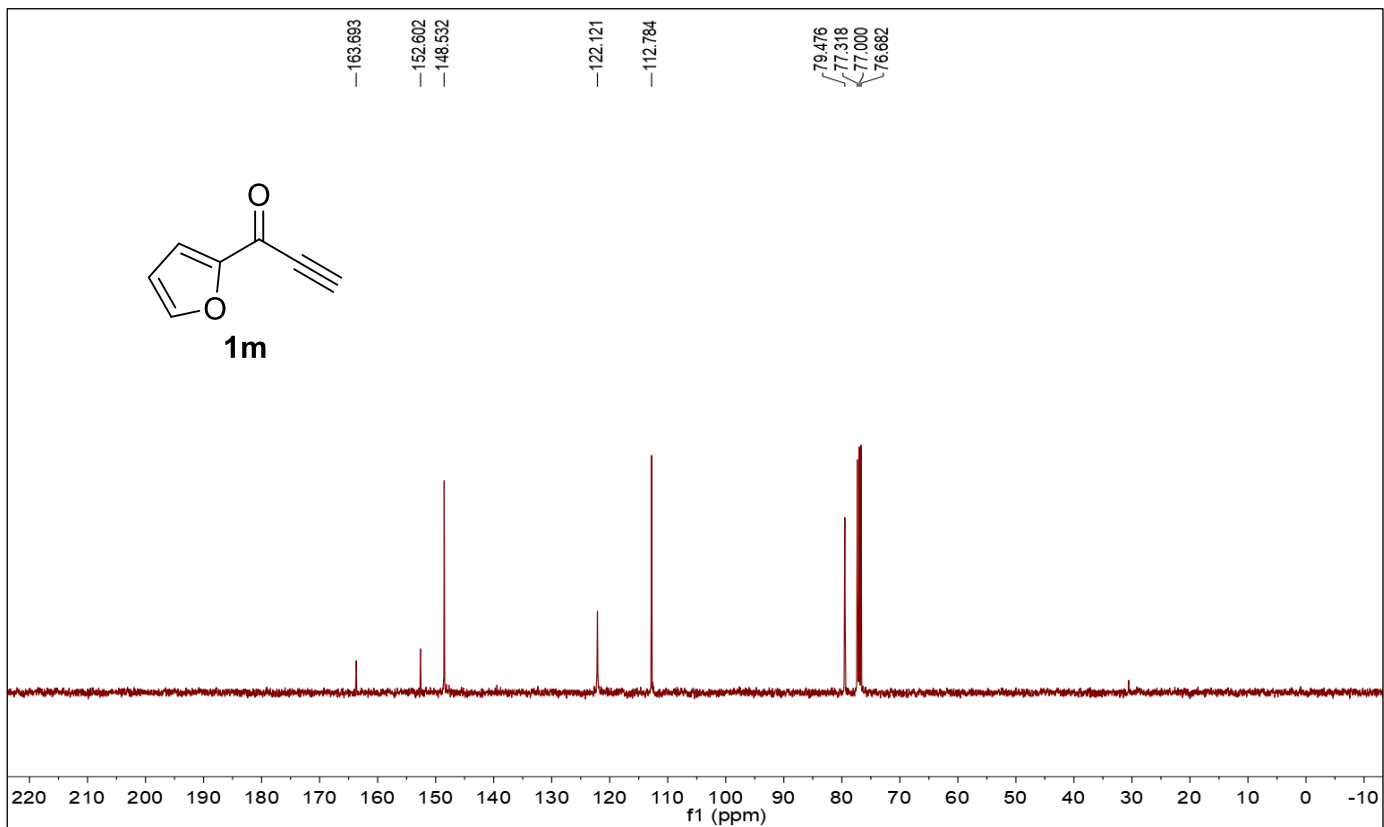

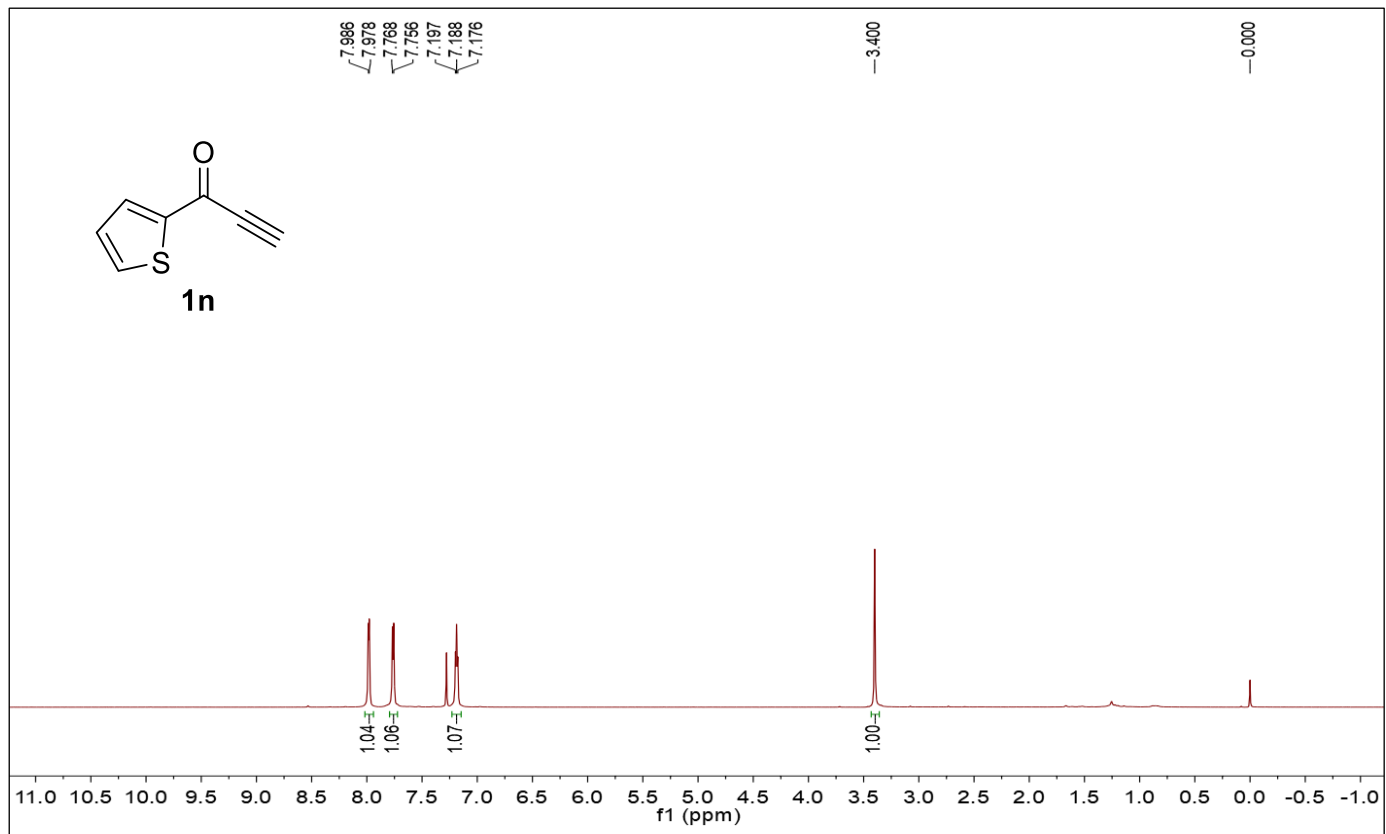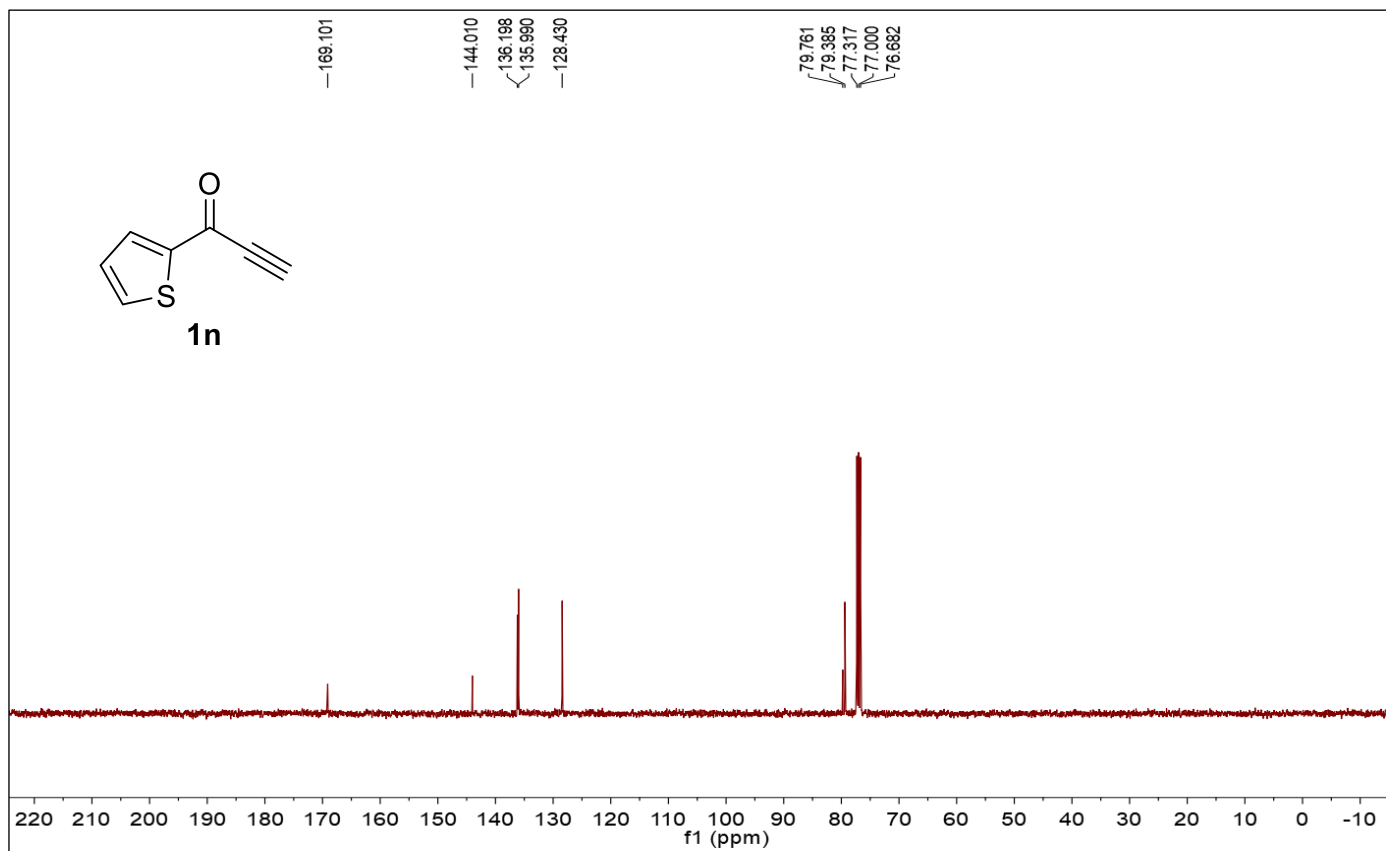

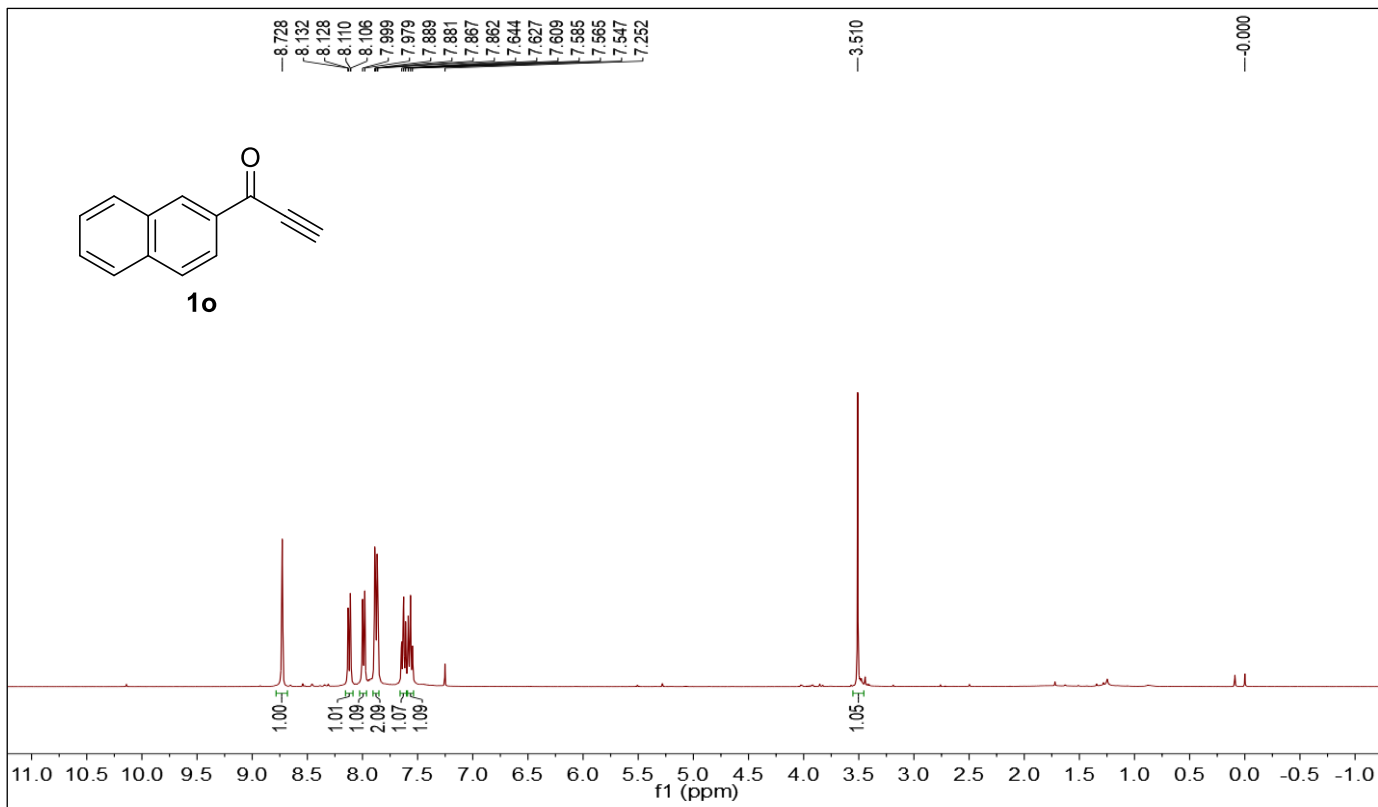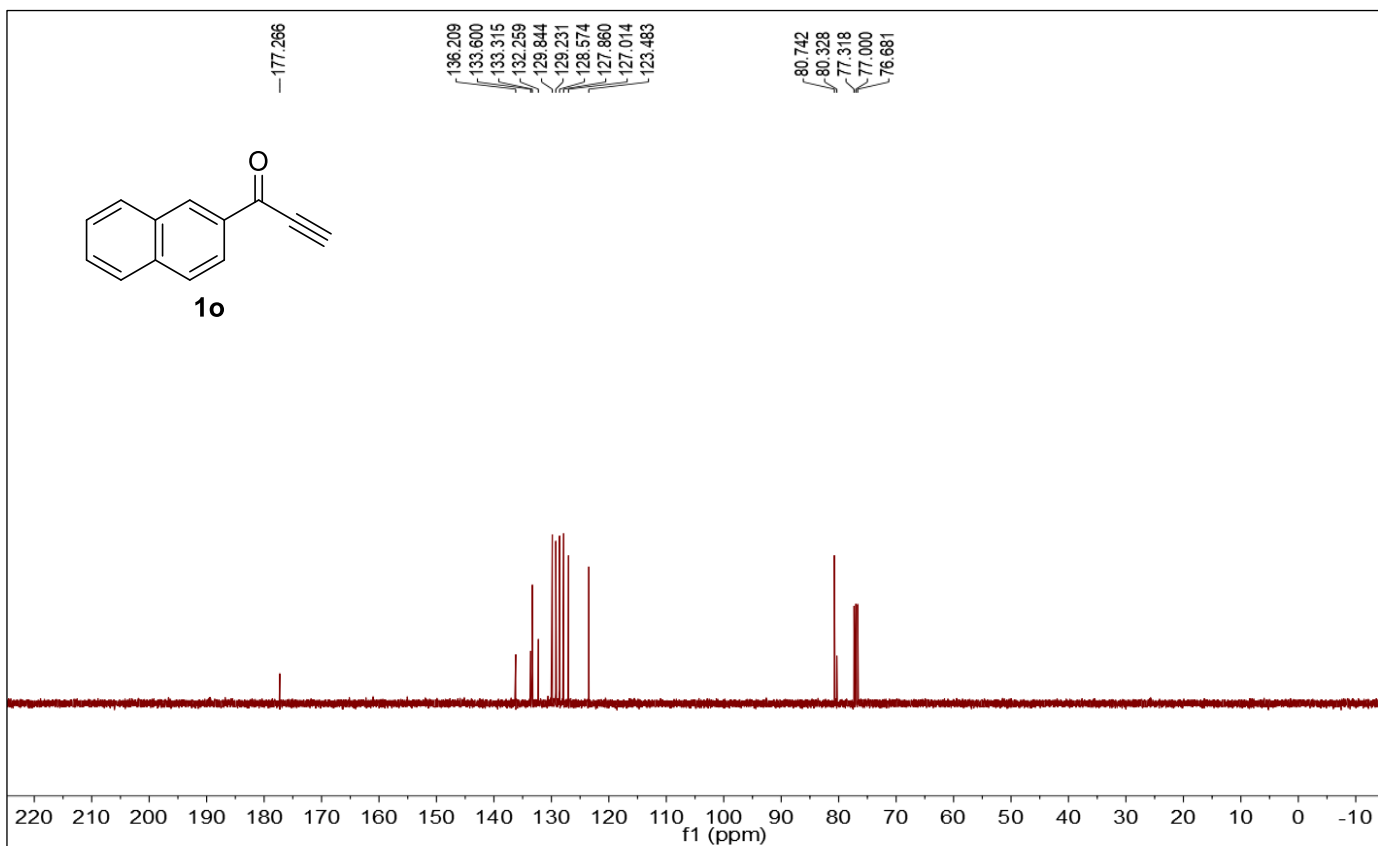



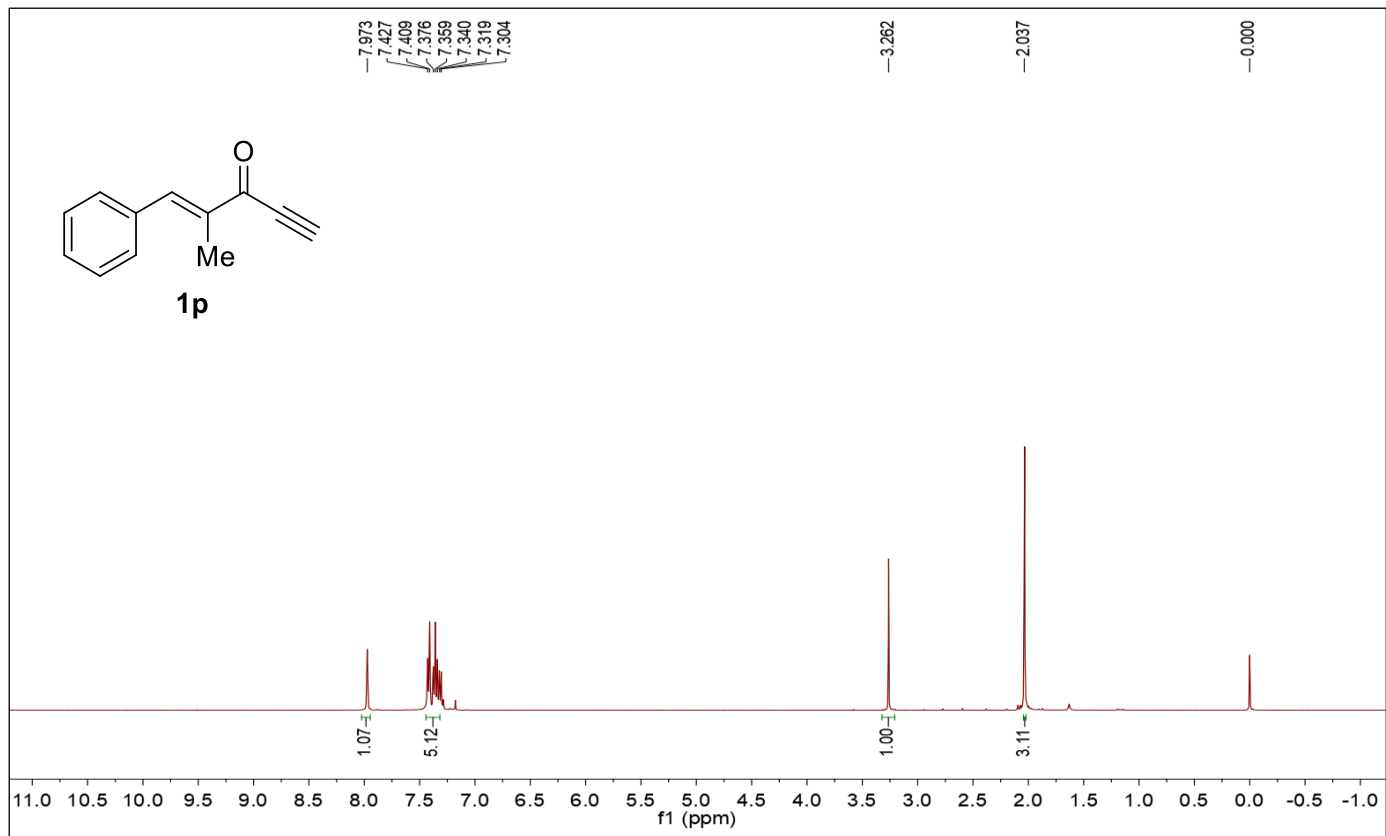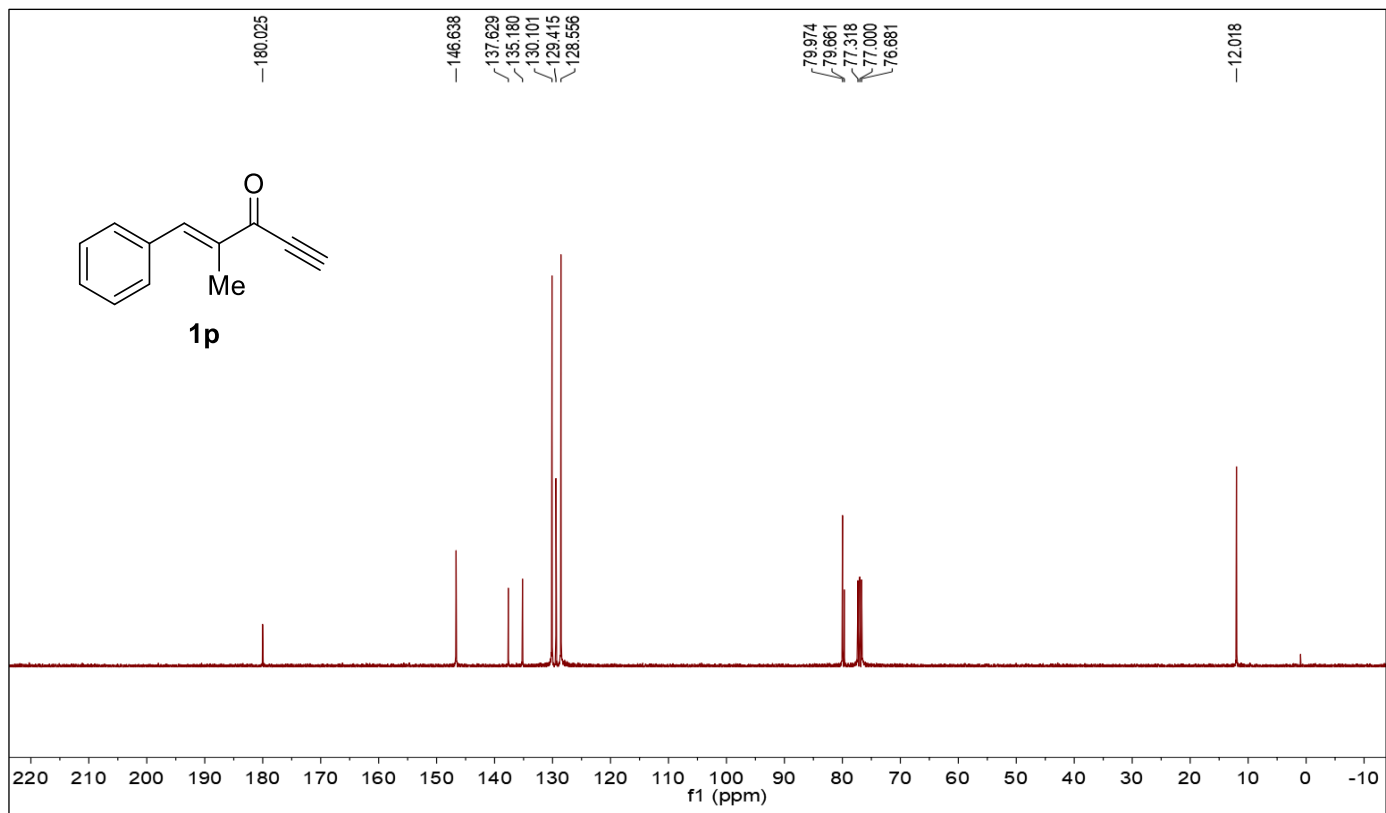

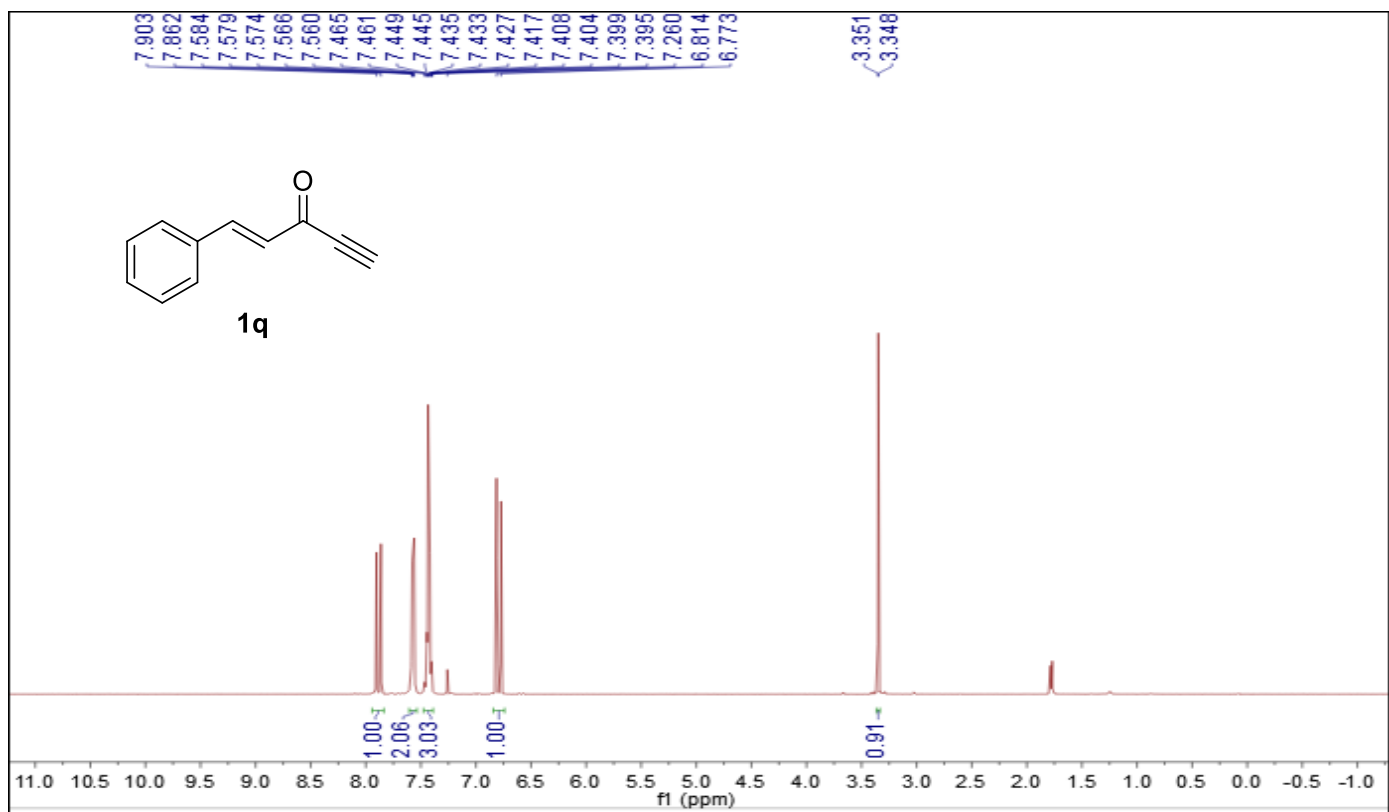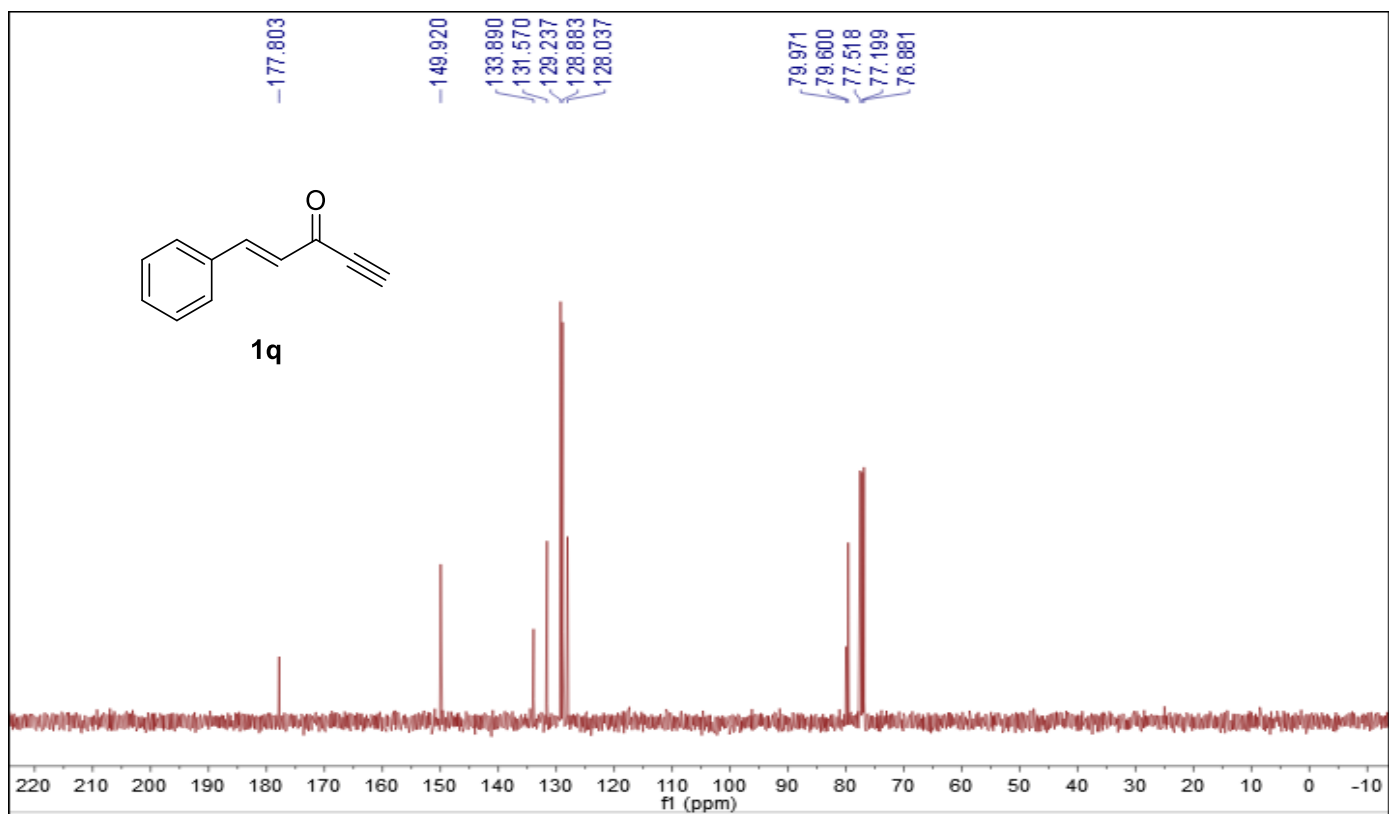

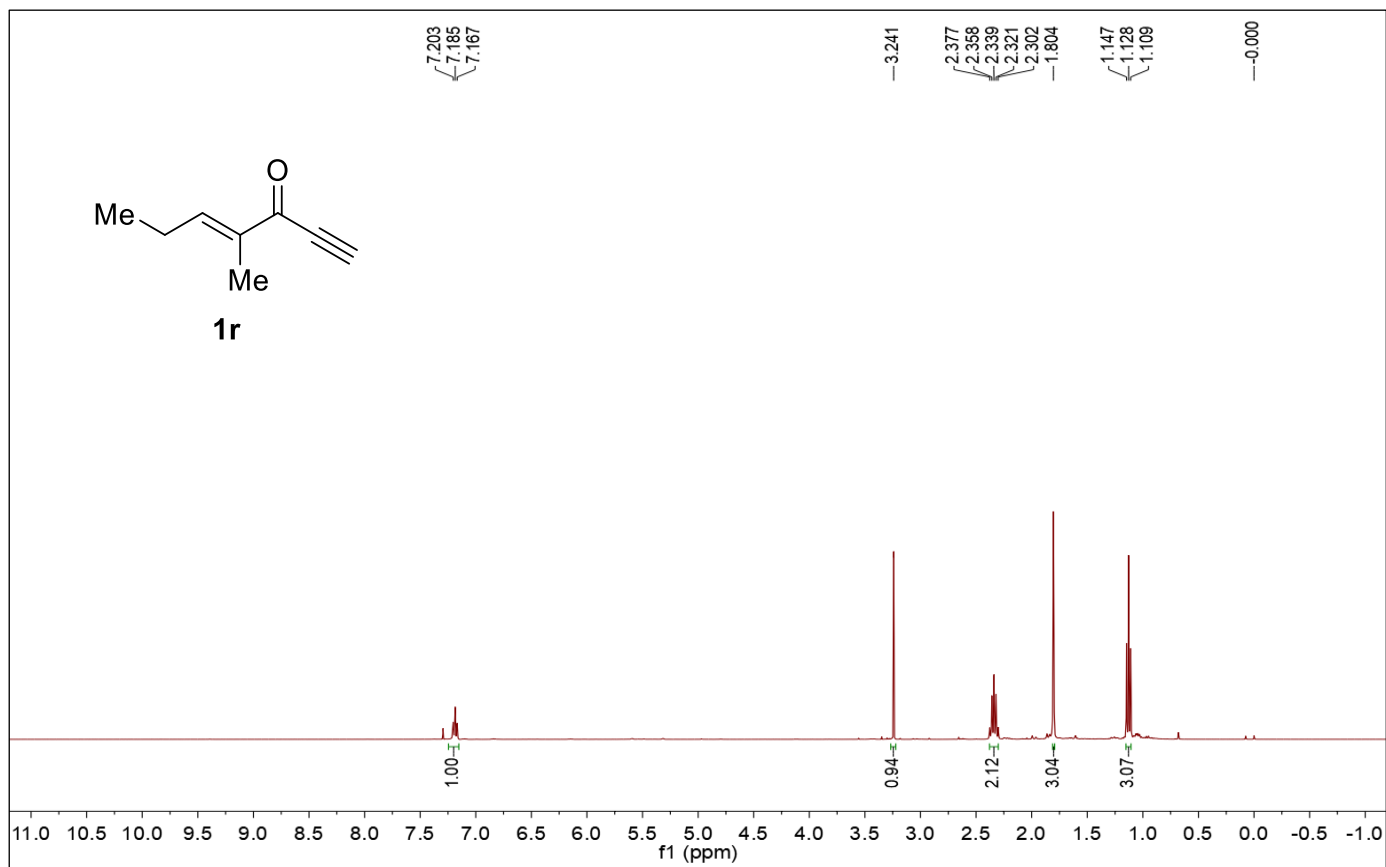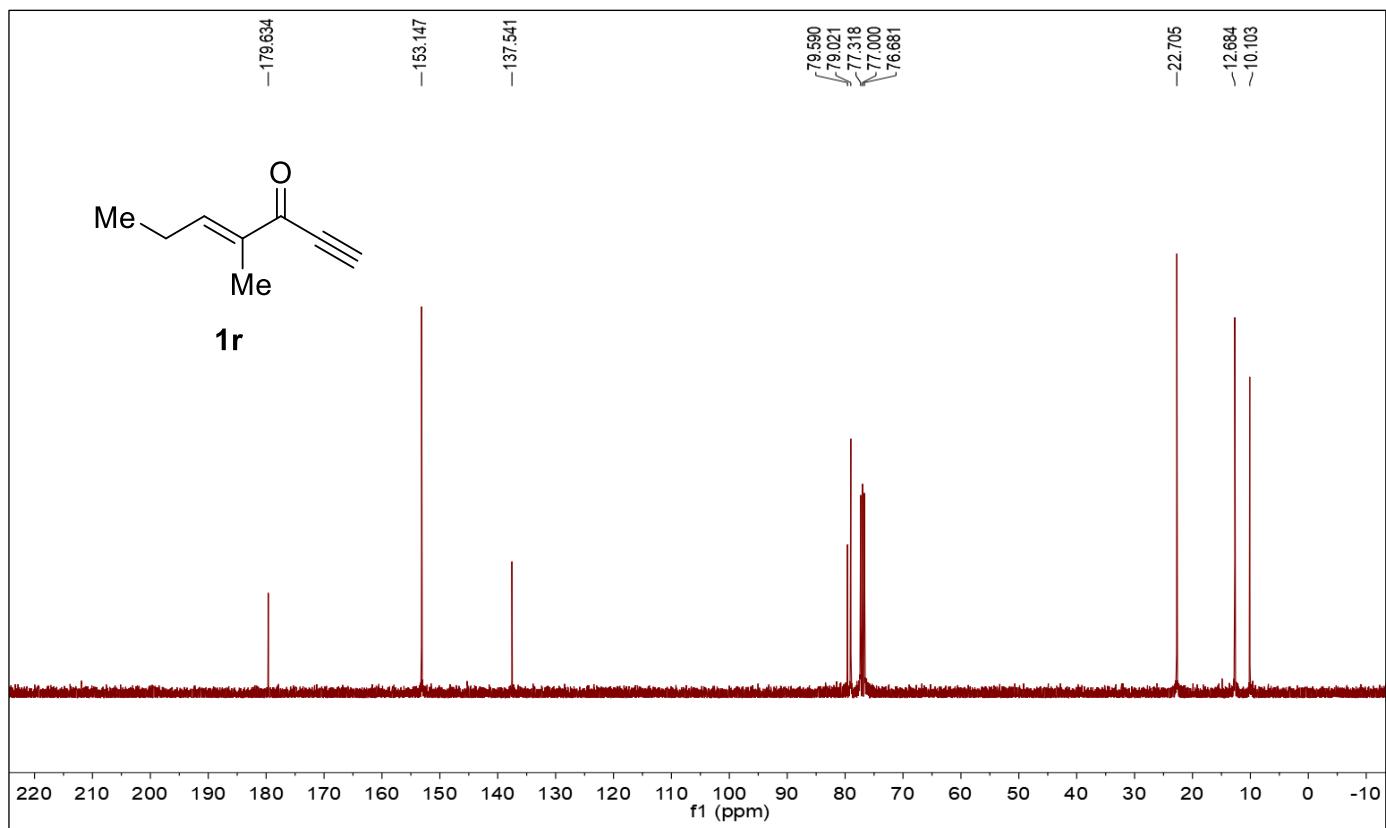

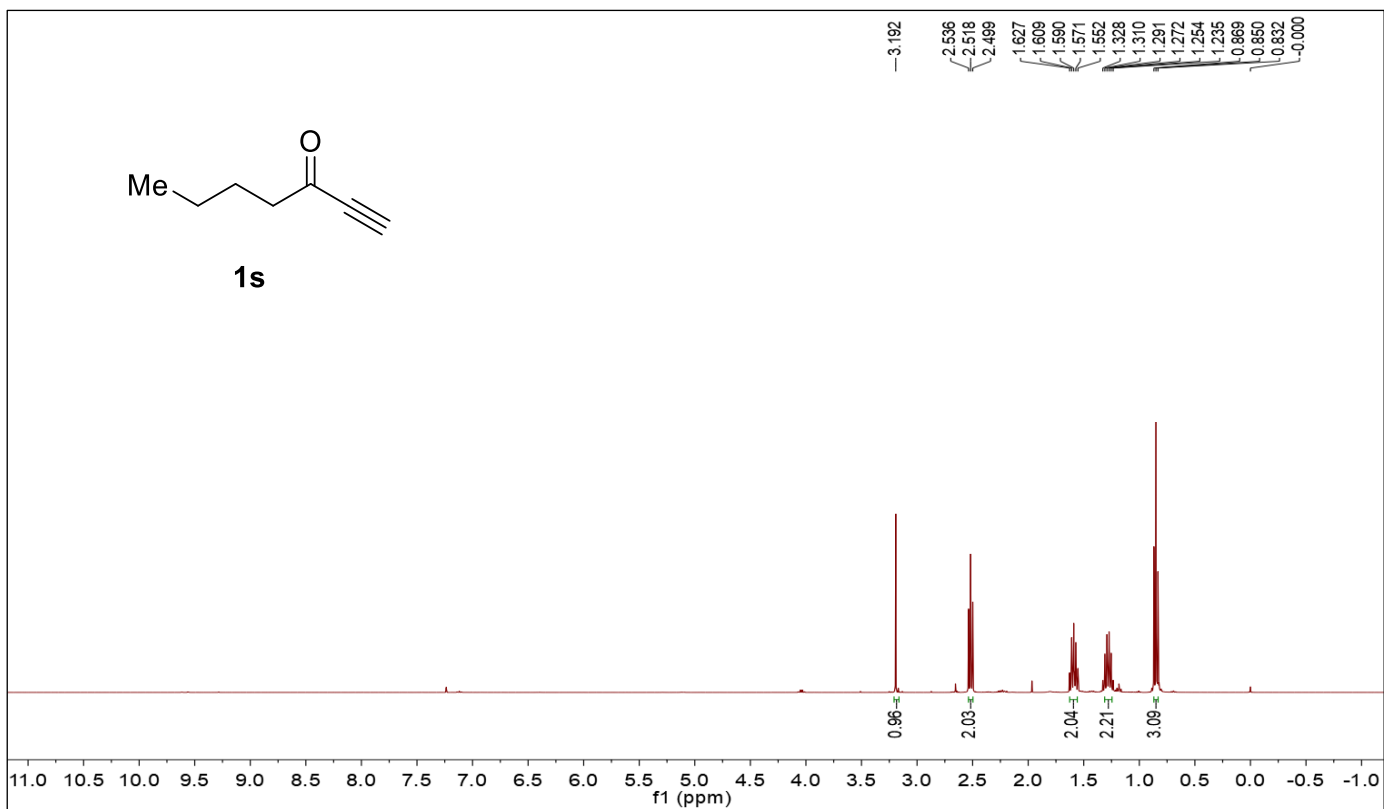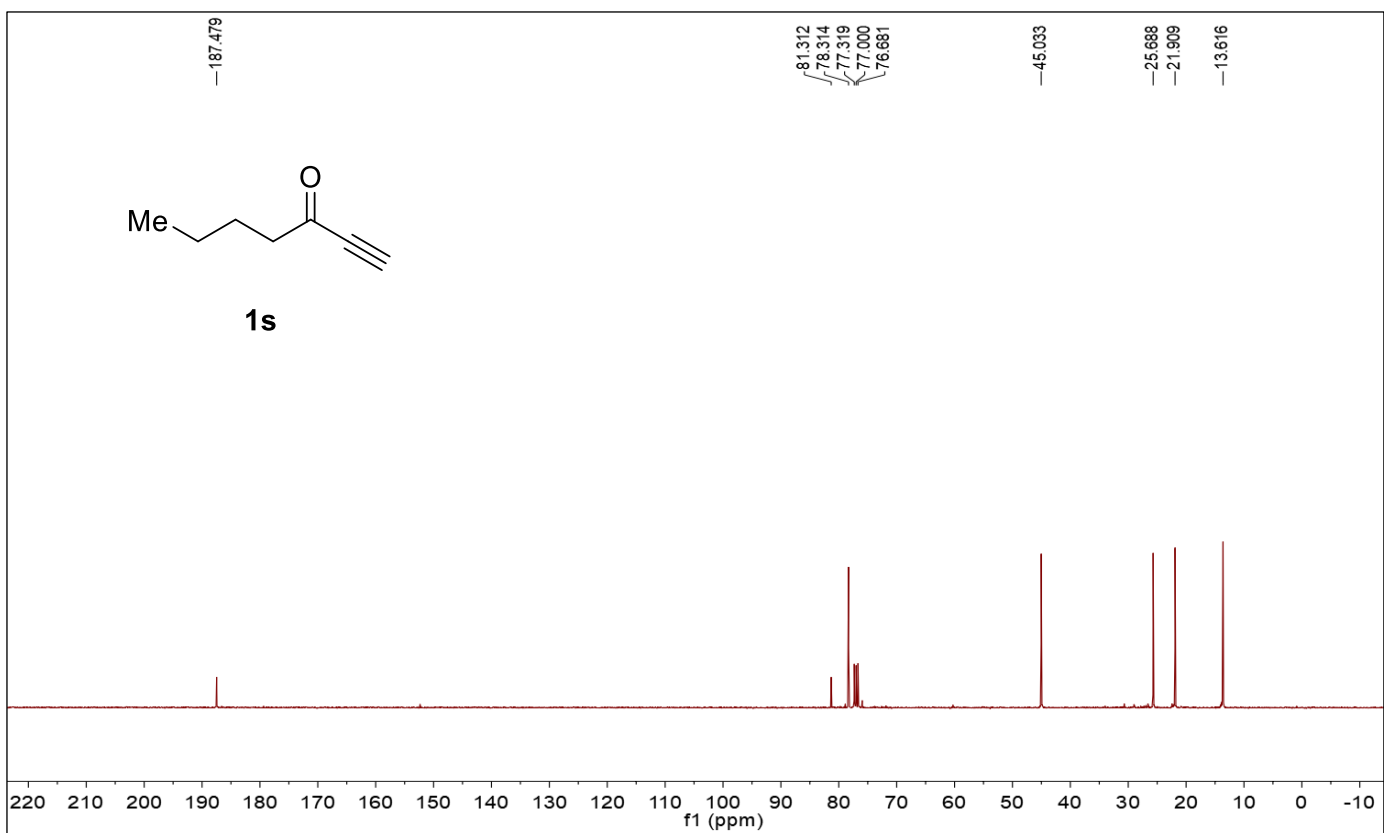

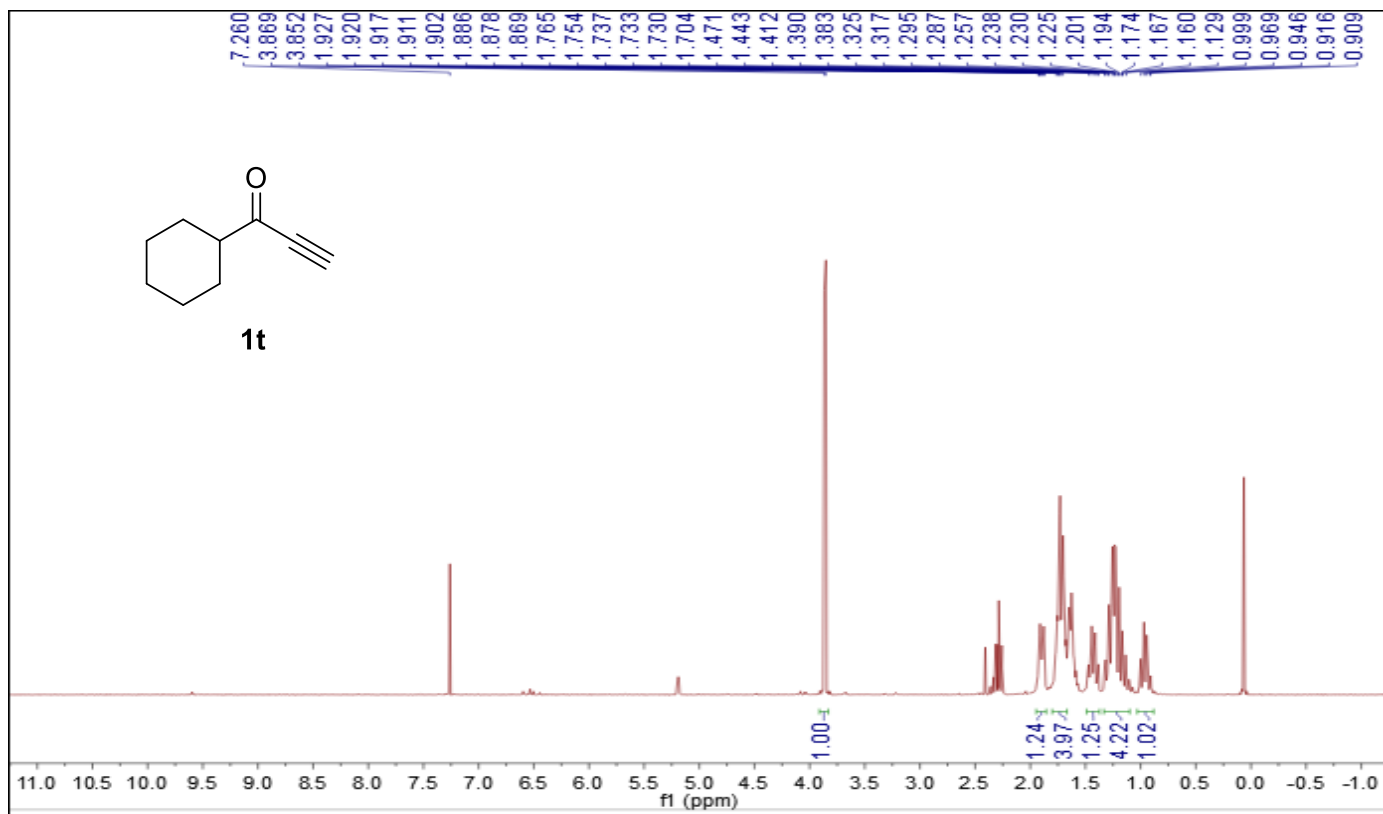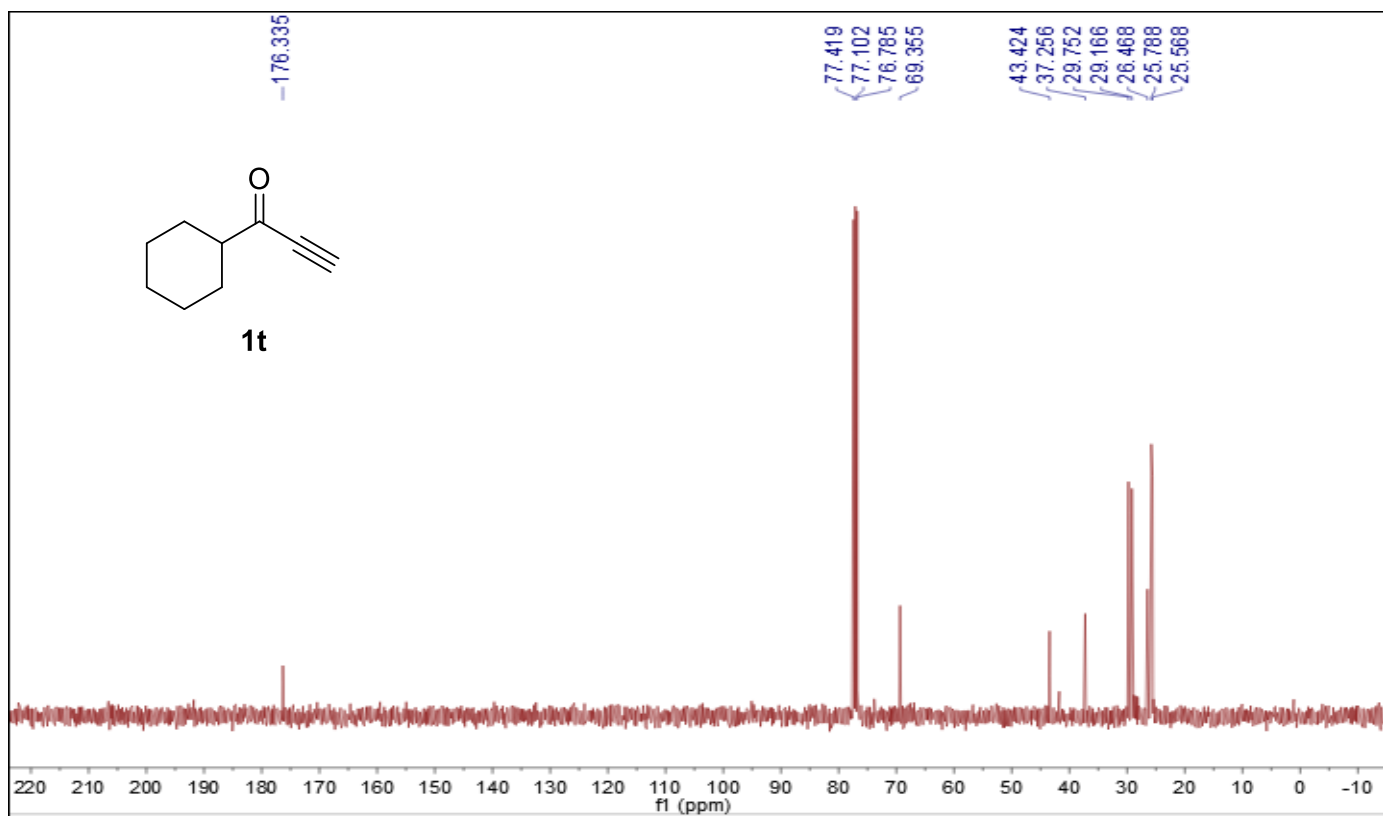

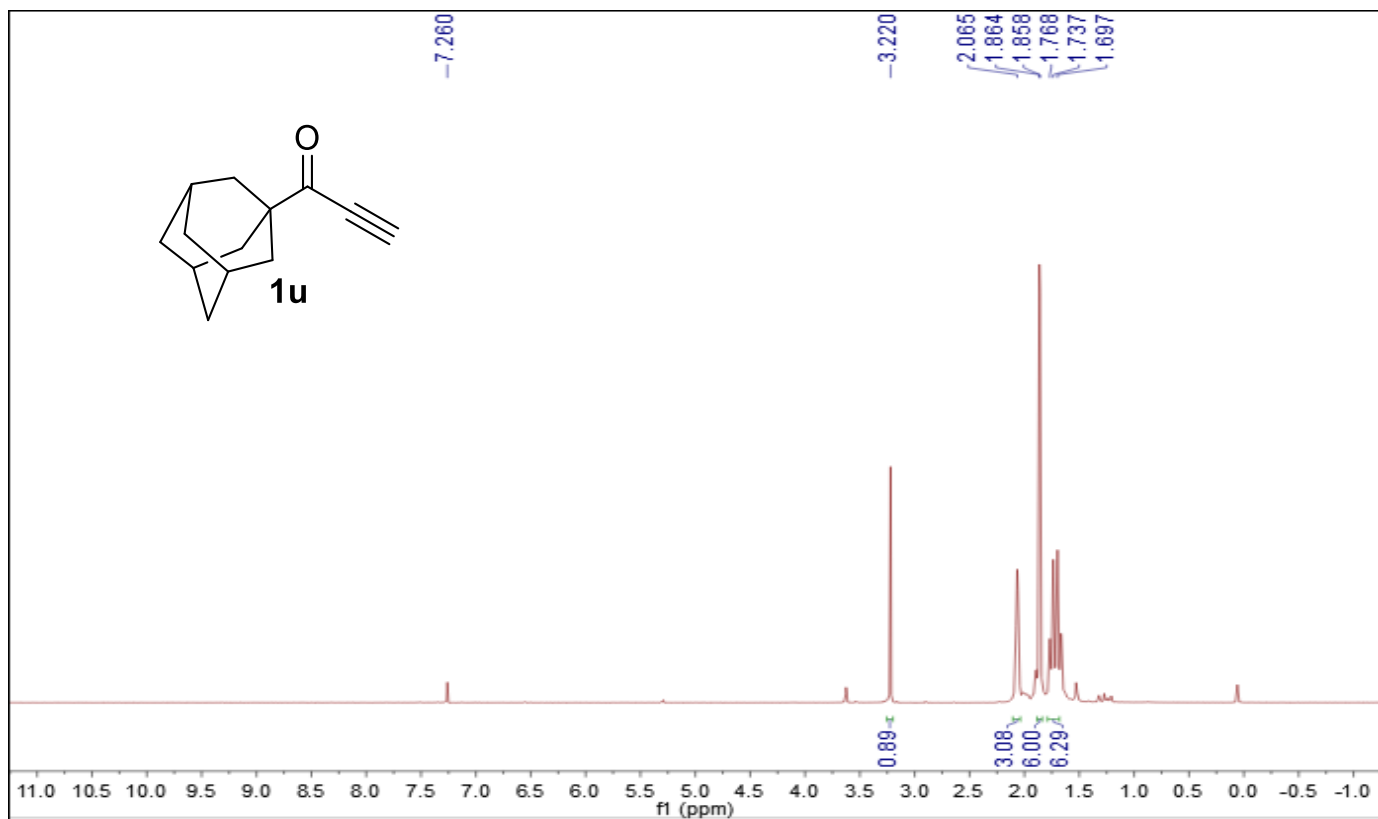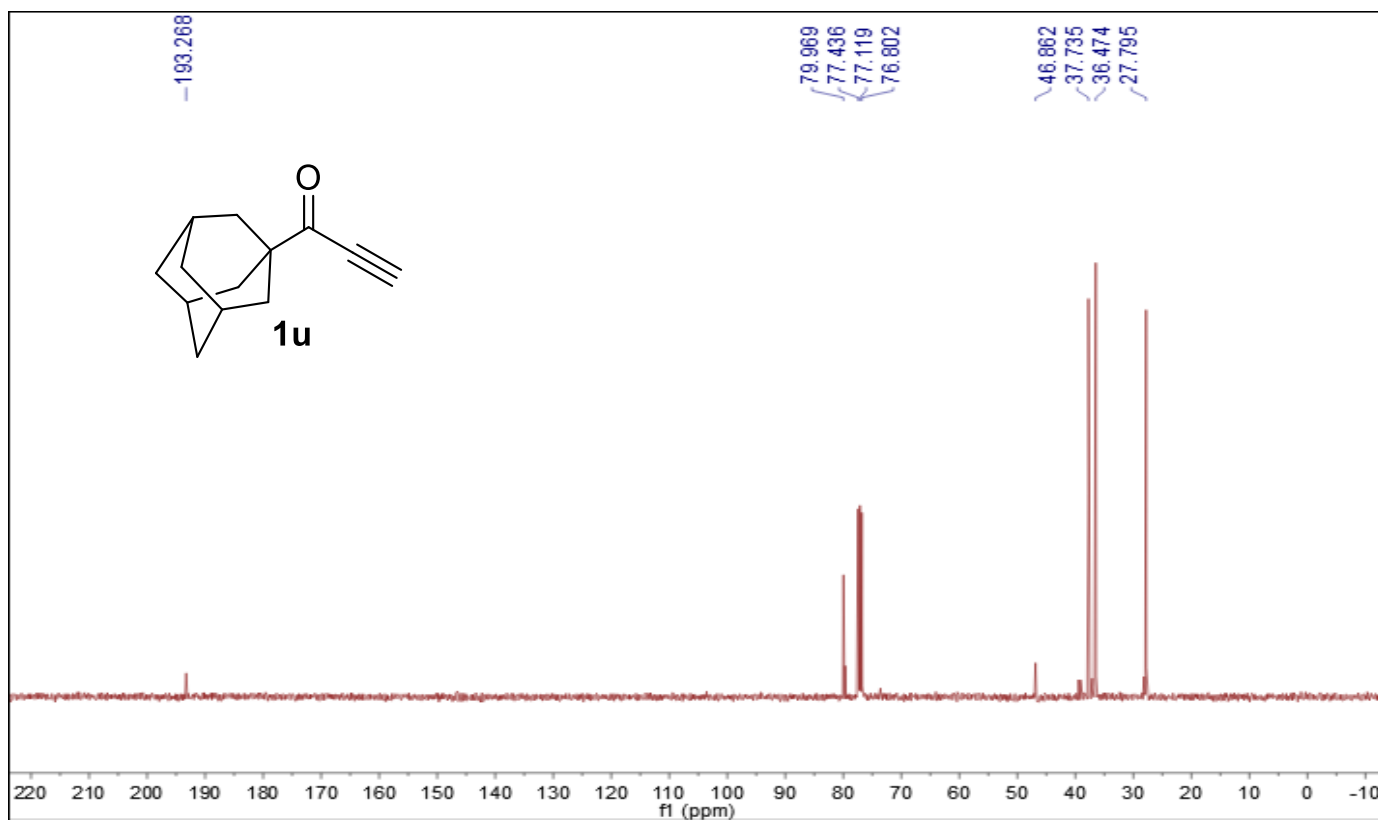

# $^1\text{H}$ and $^{13}\text{C}$ NMR spectra of $\beta$ -aminoketones

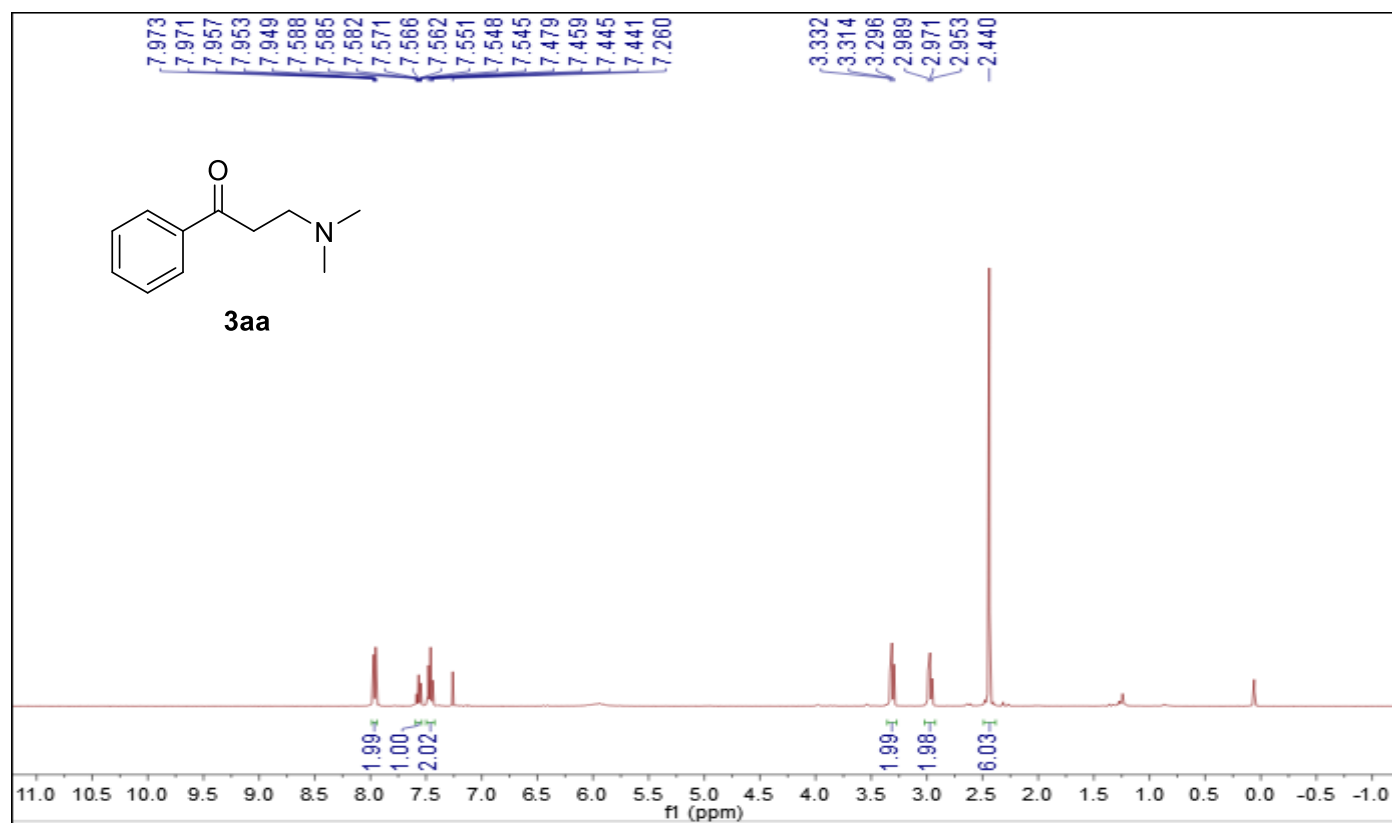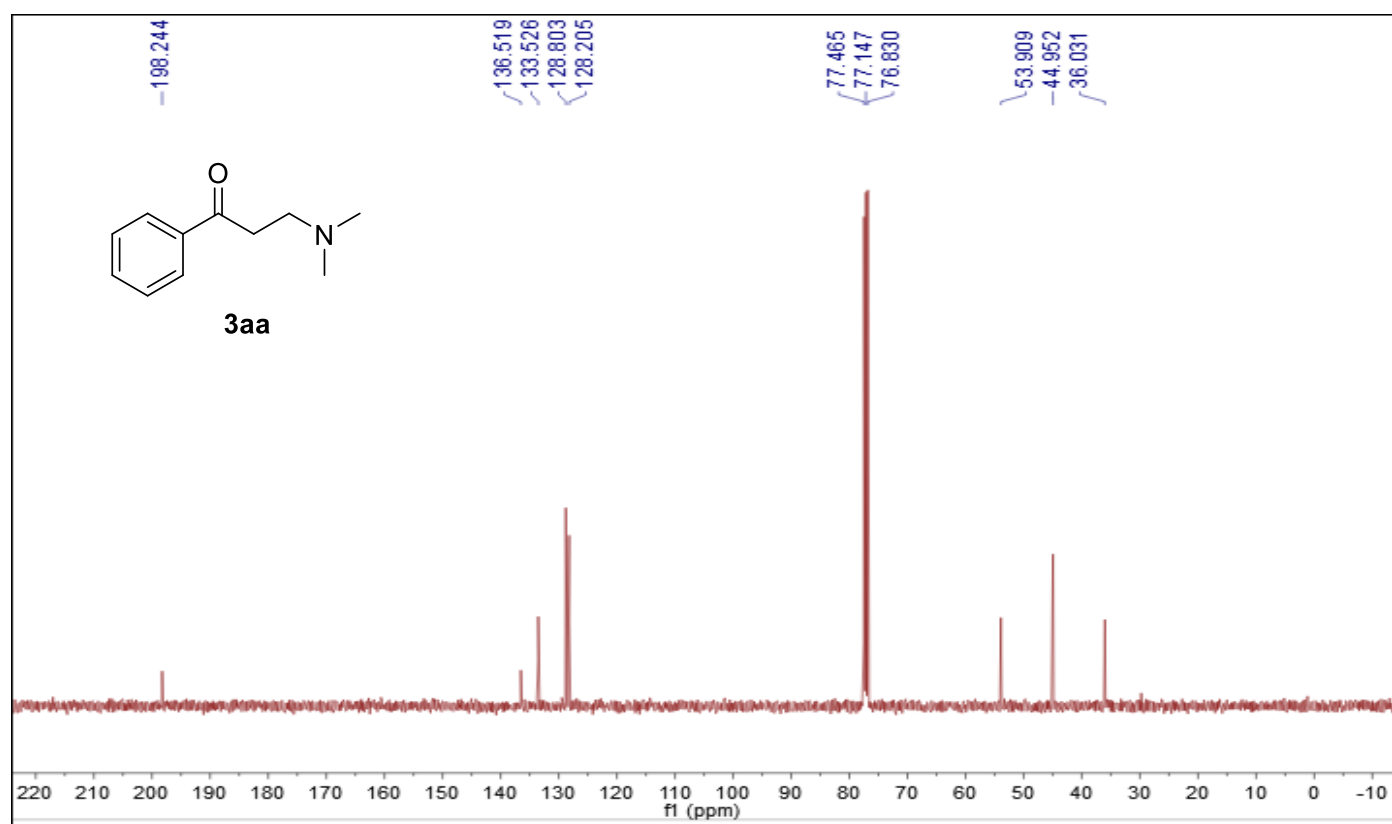

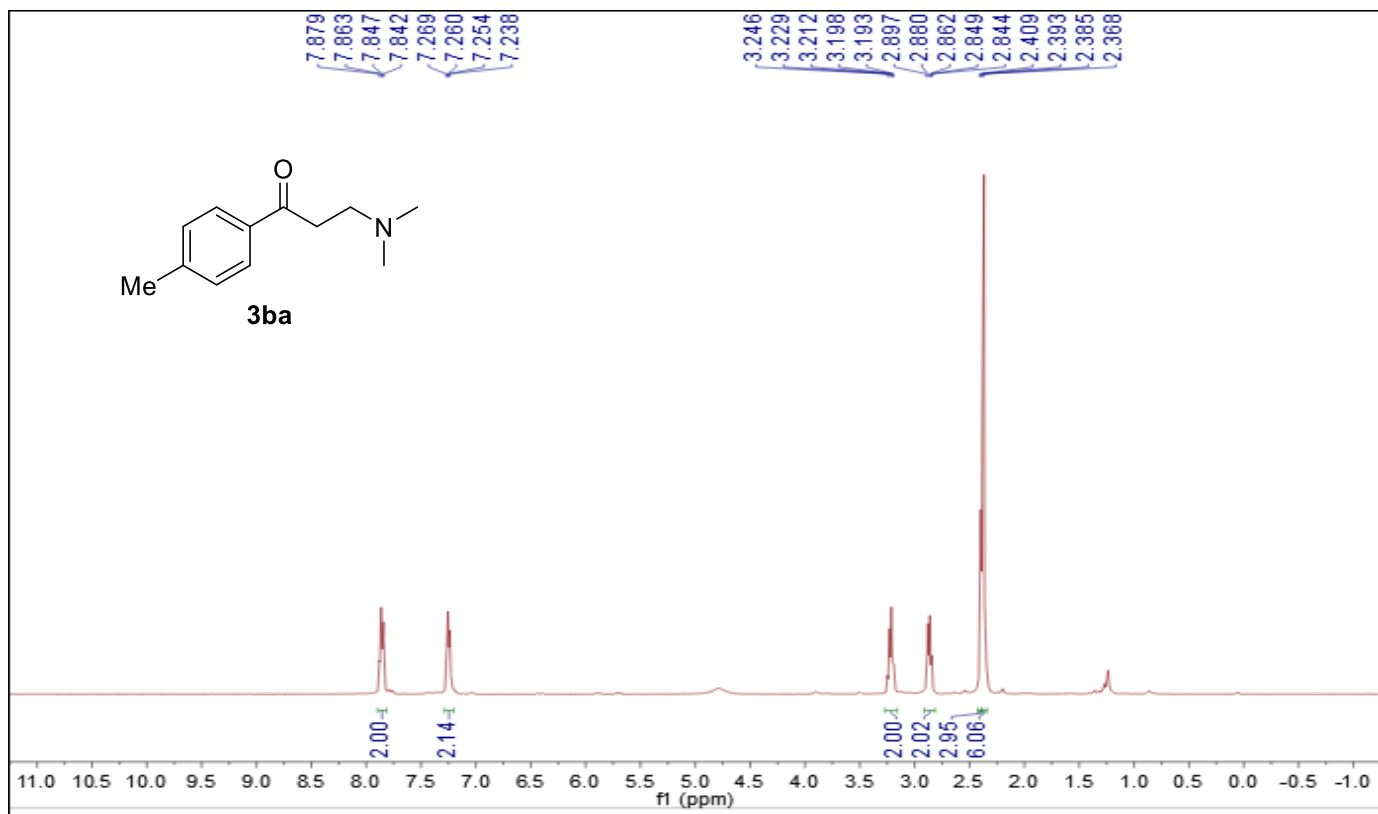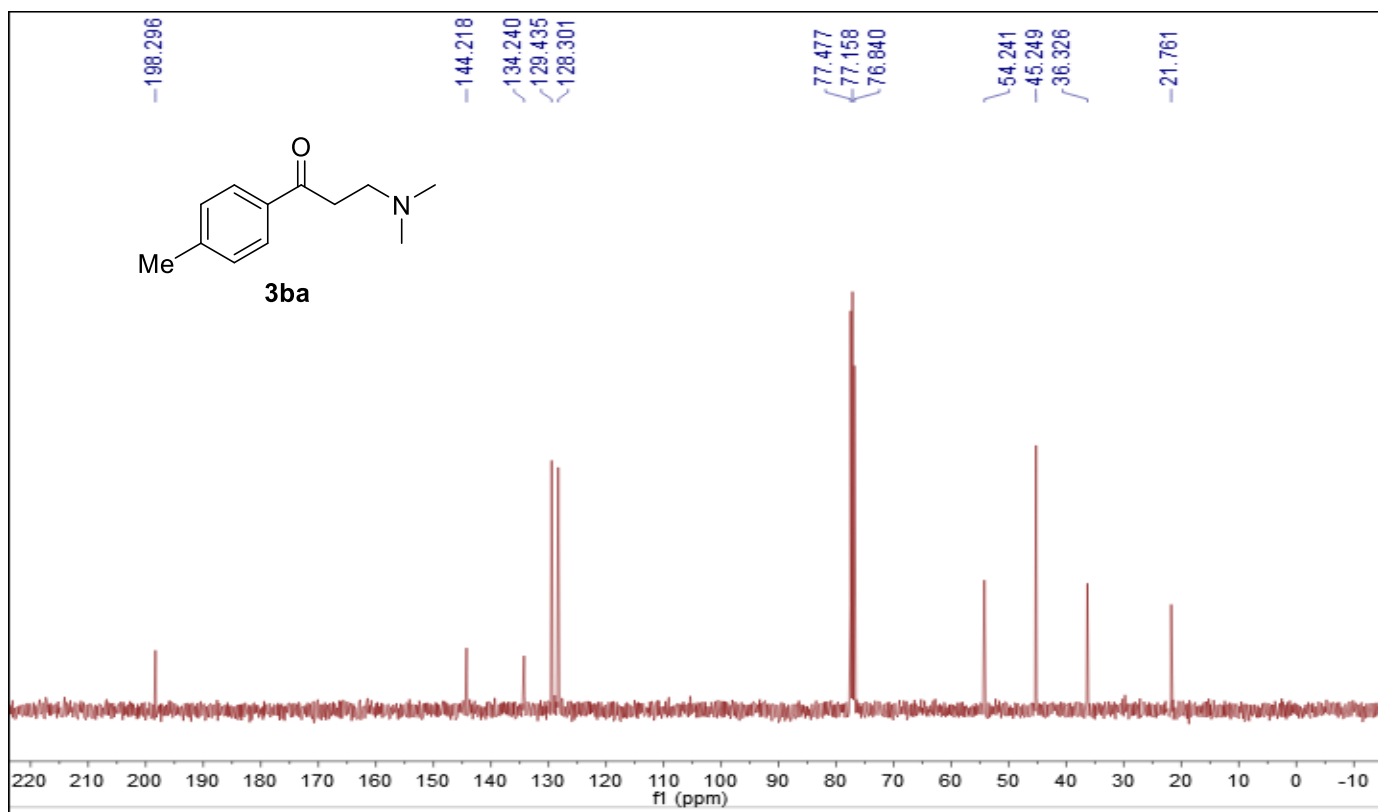



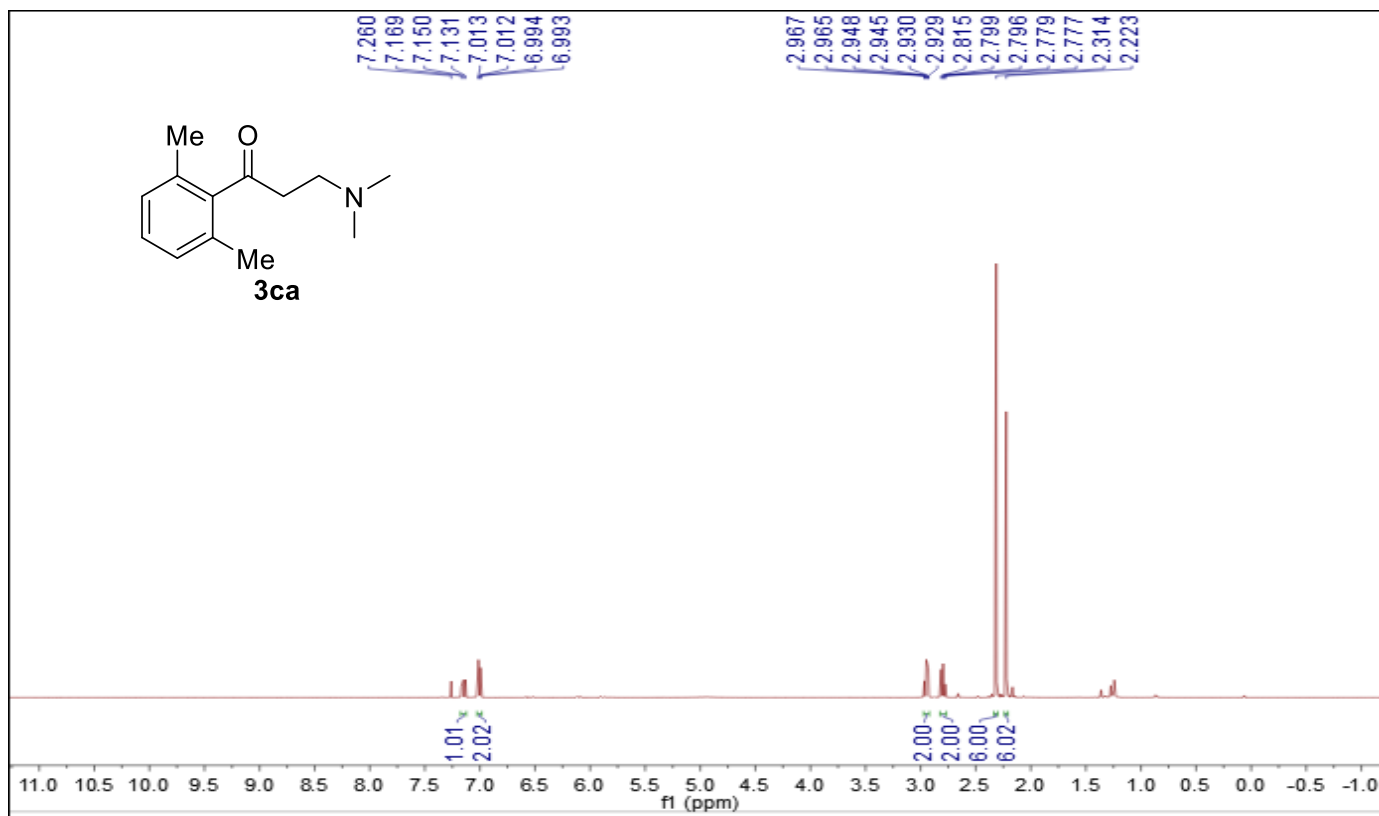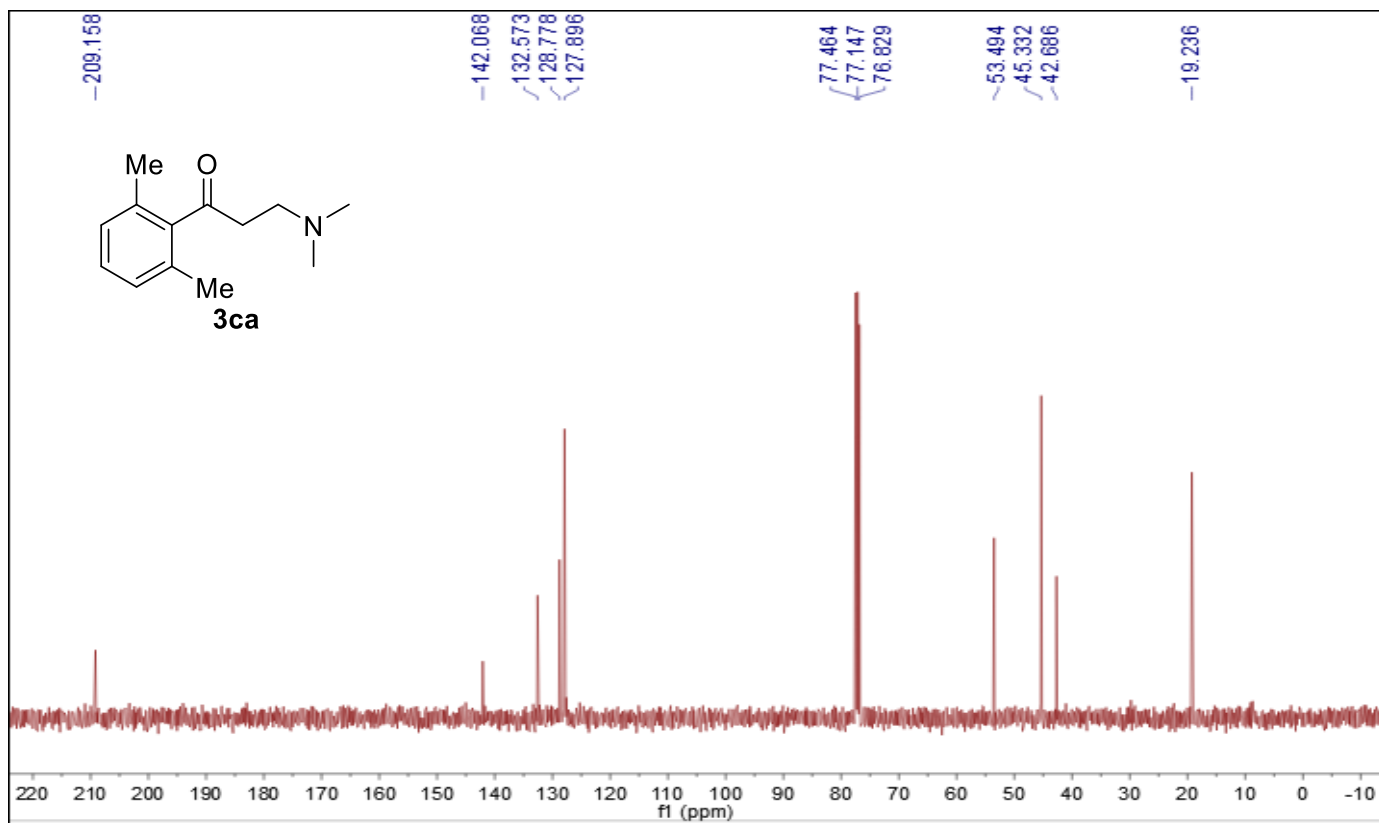

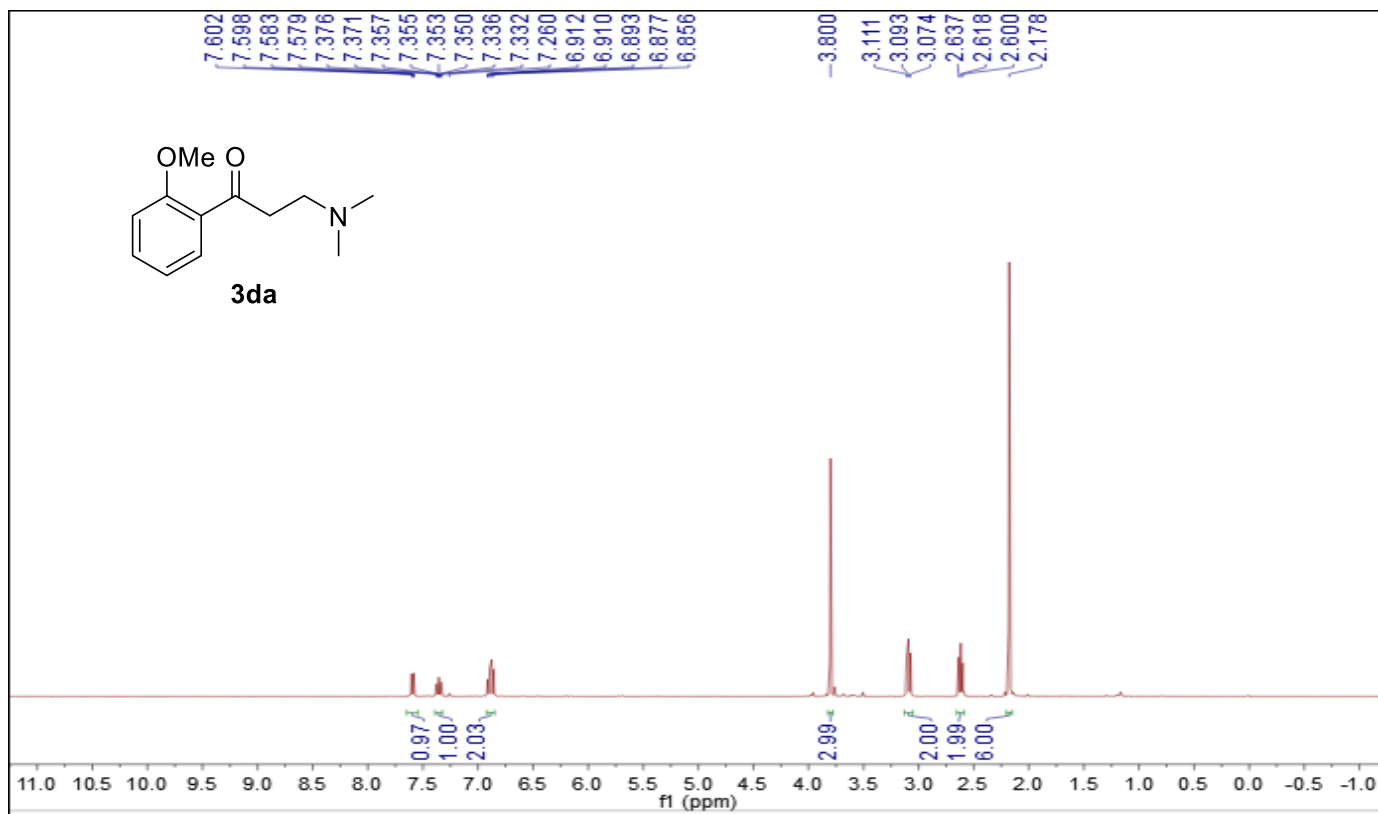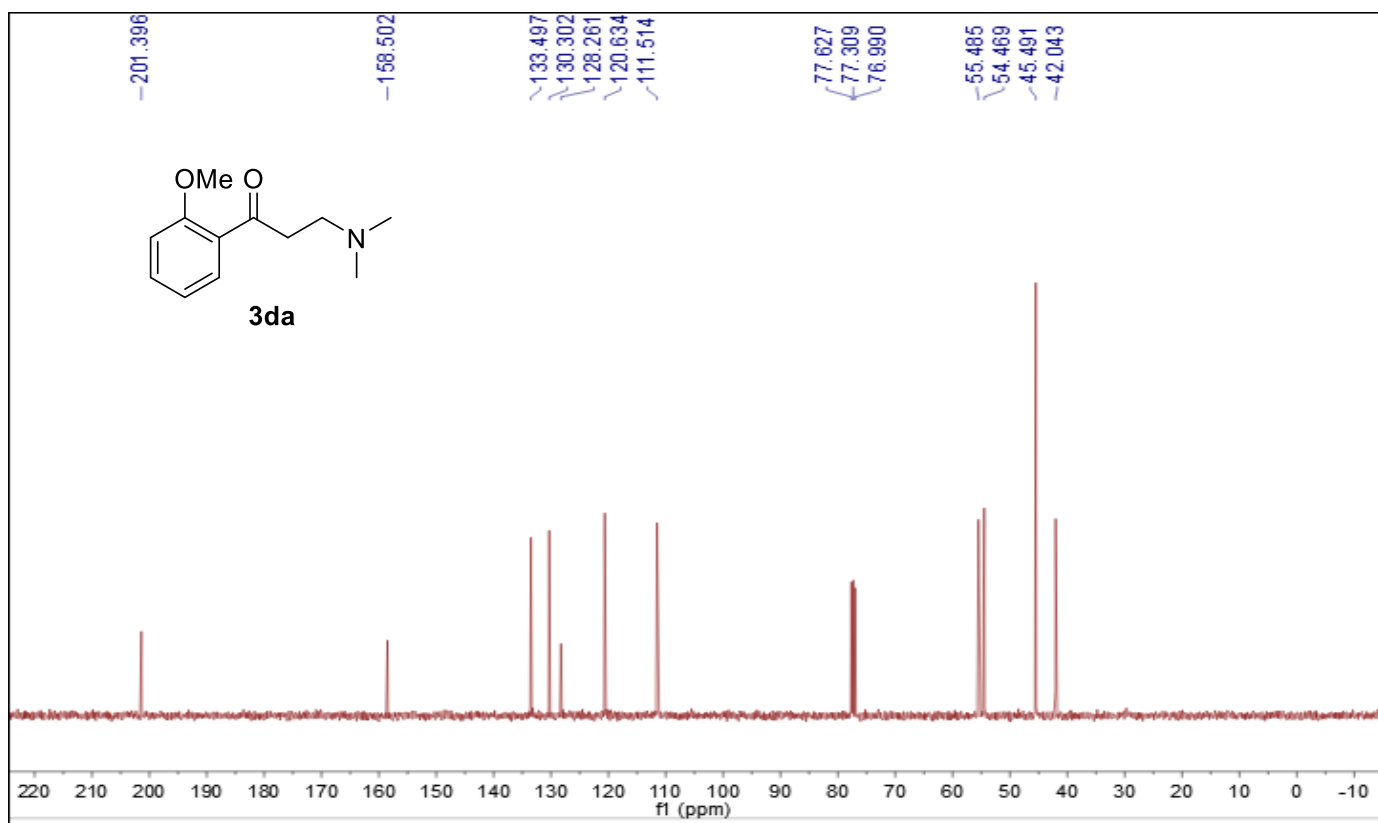

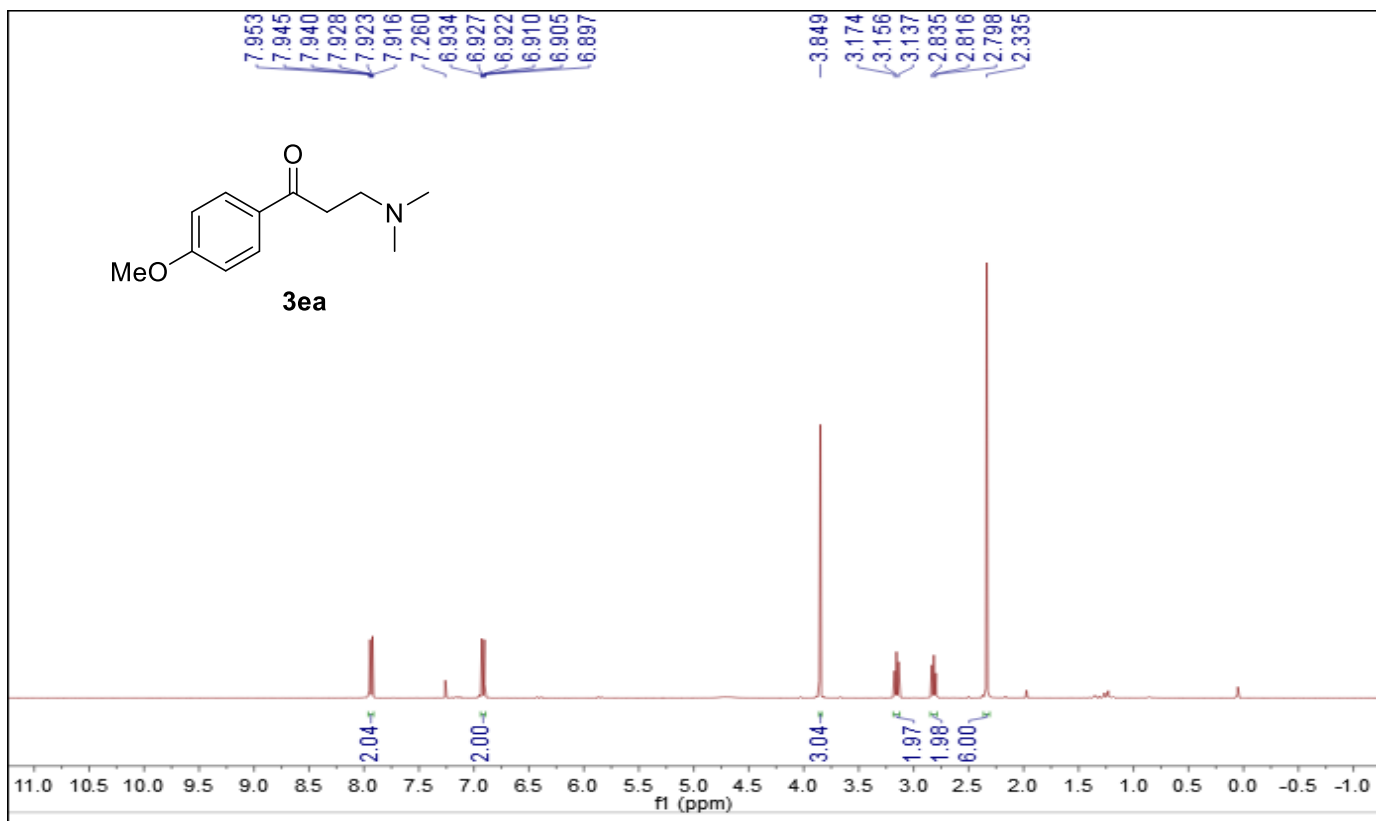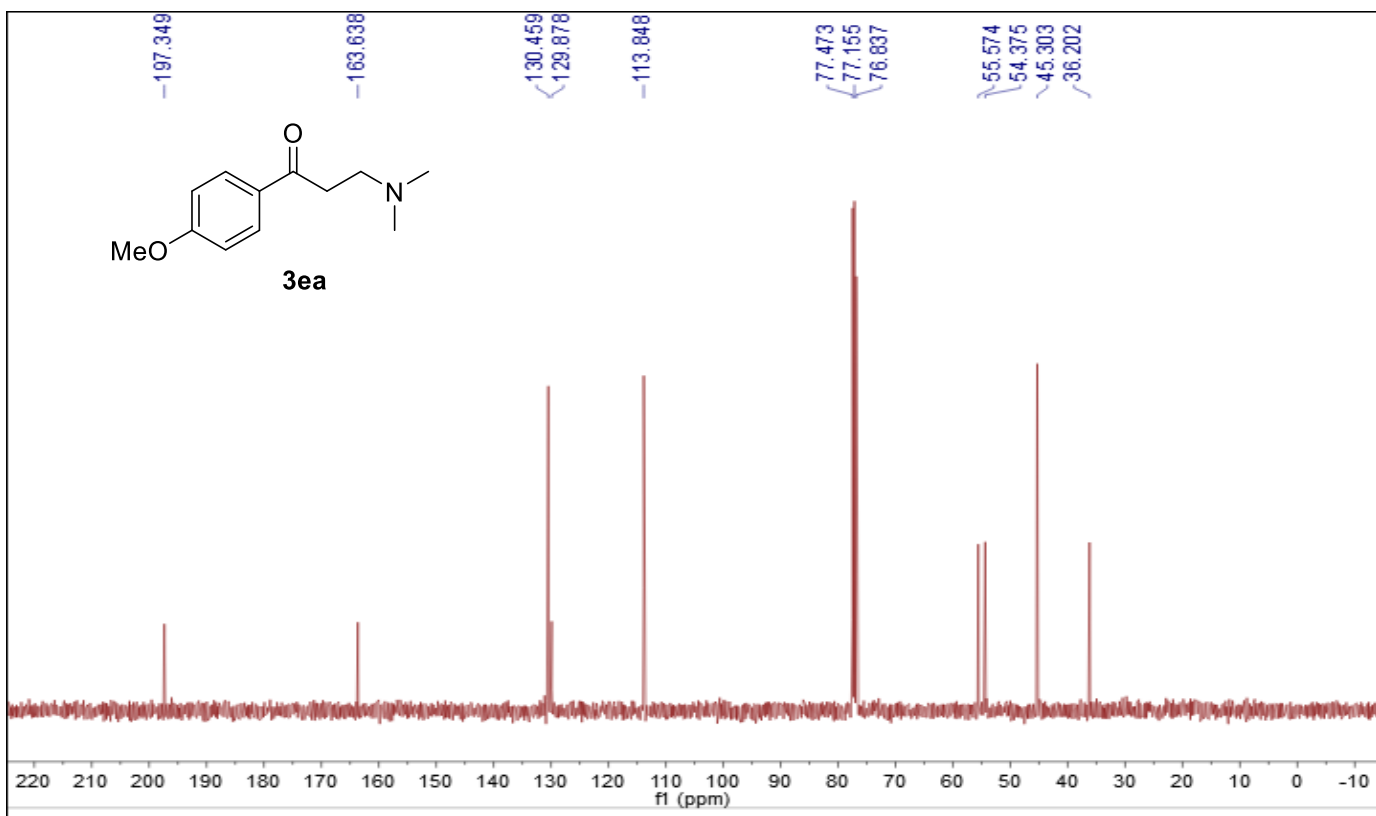

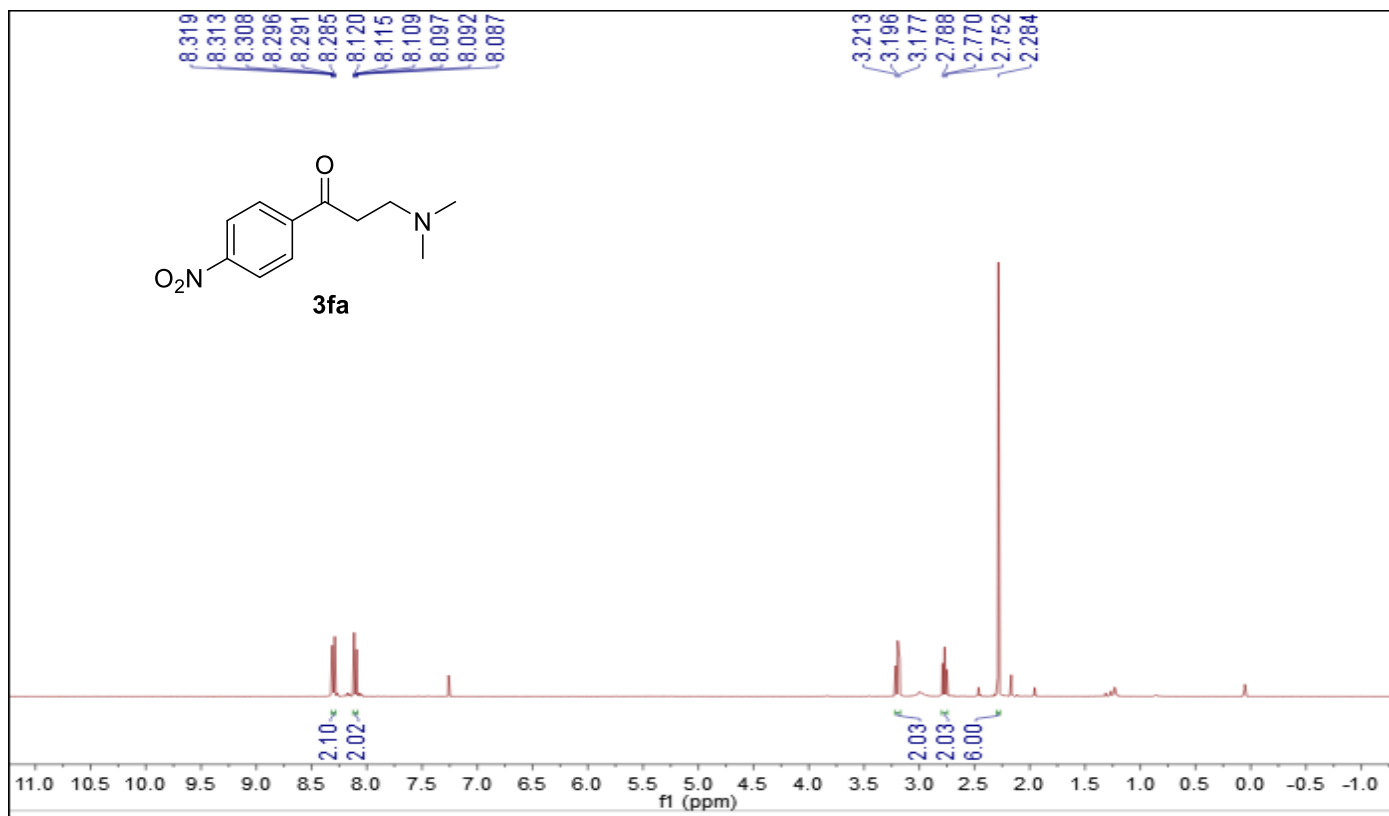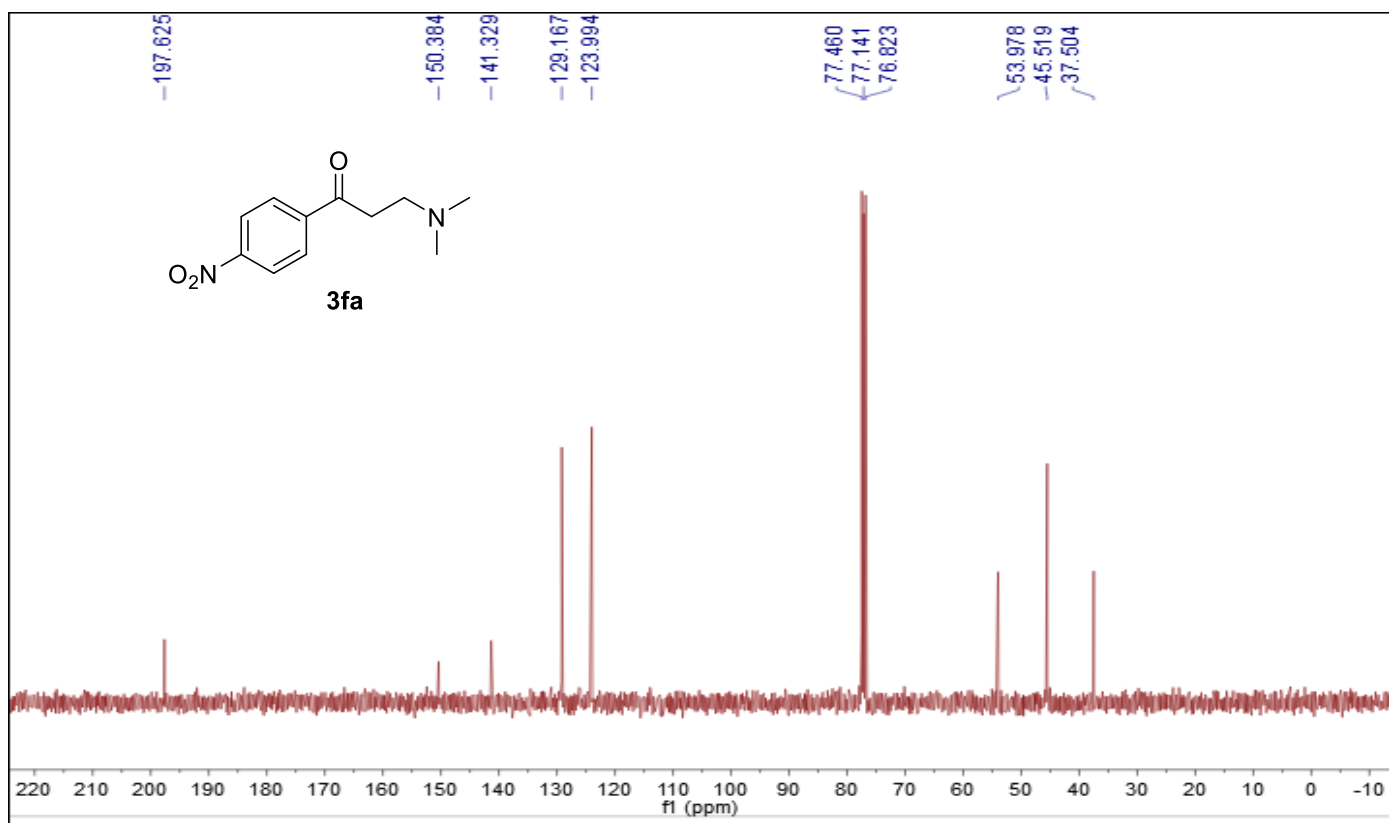

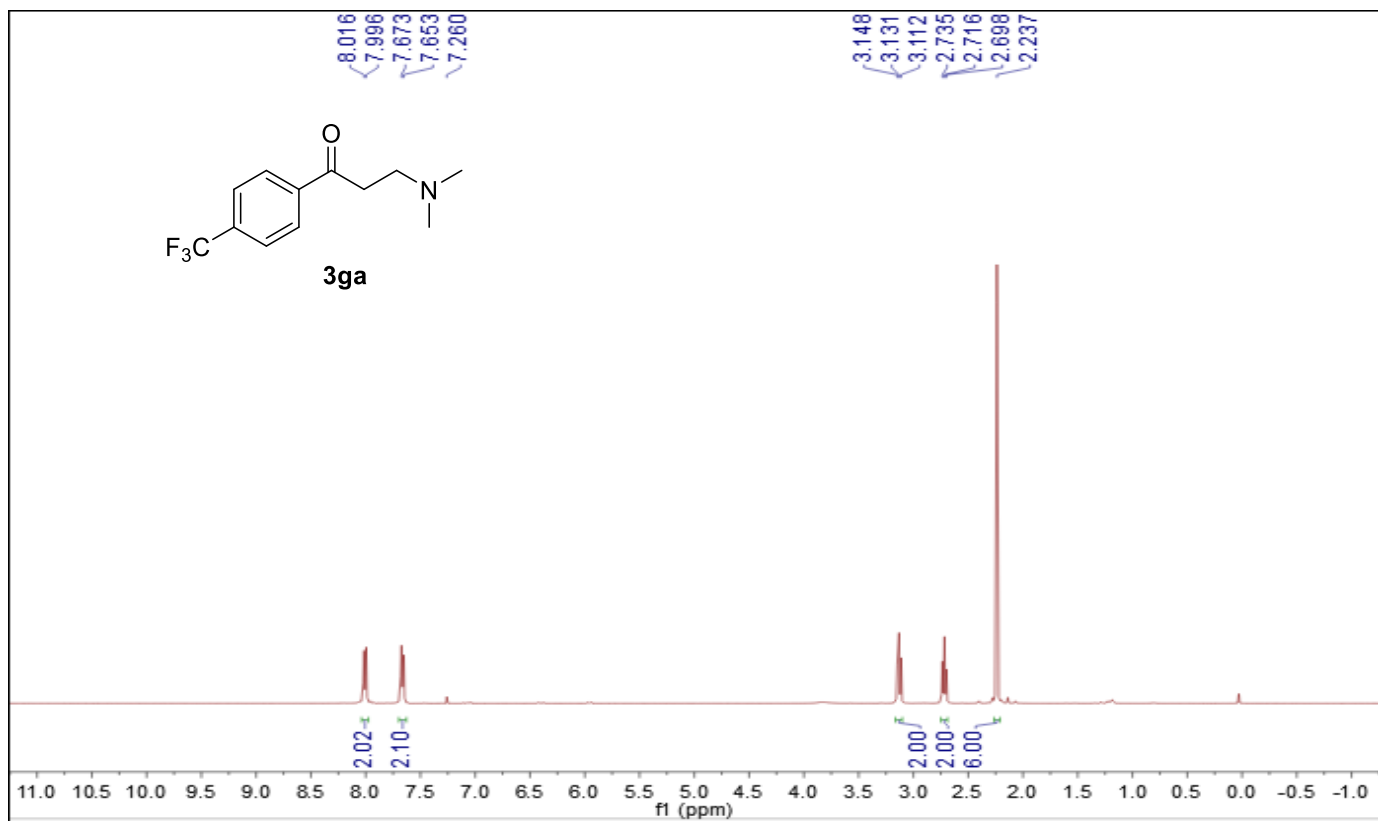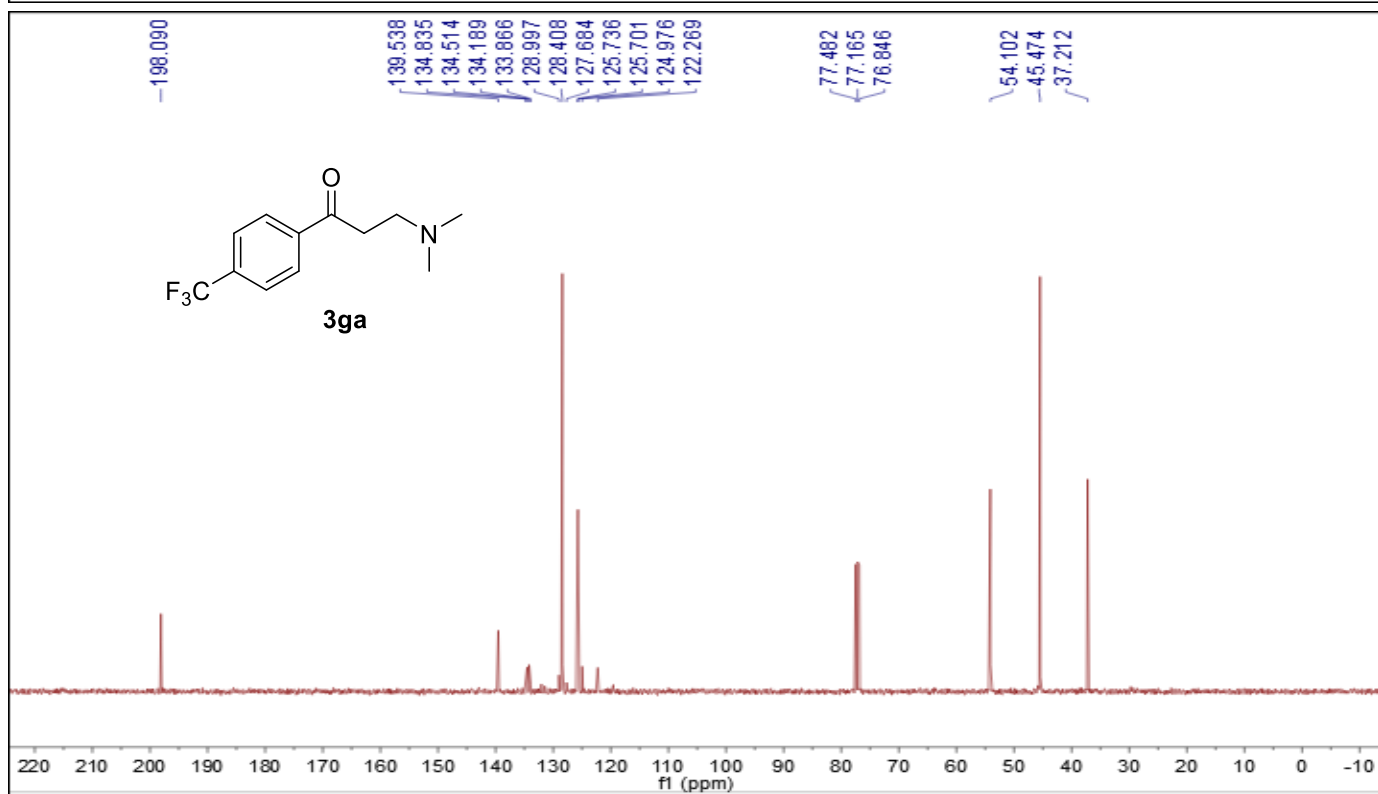

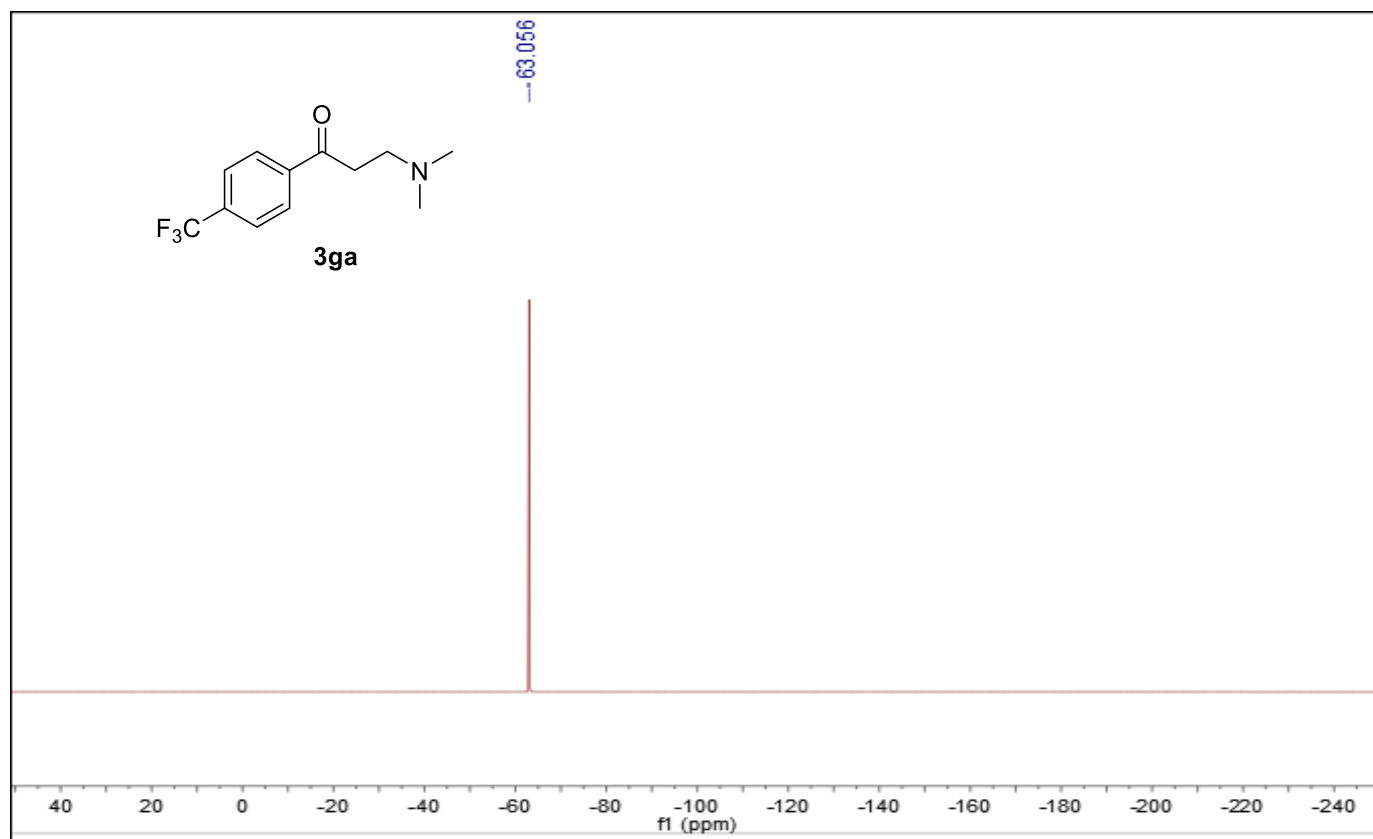

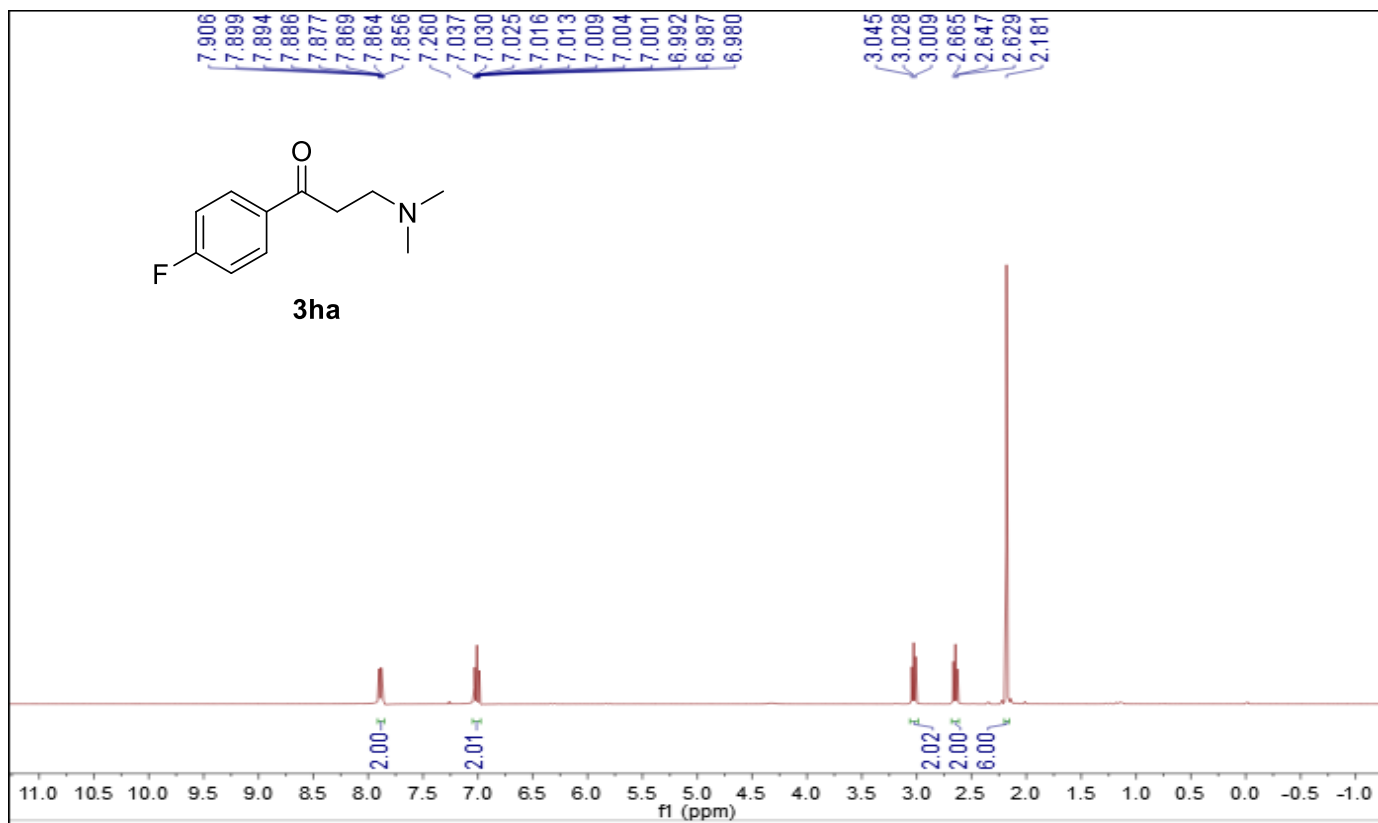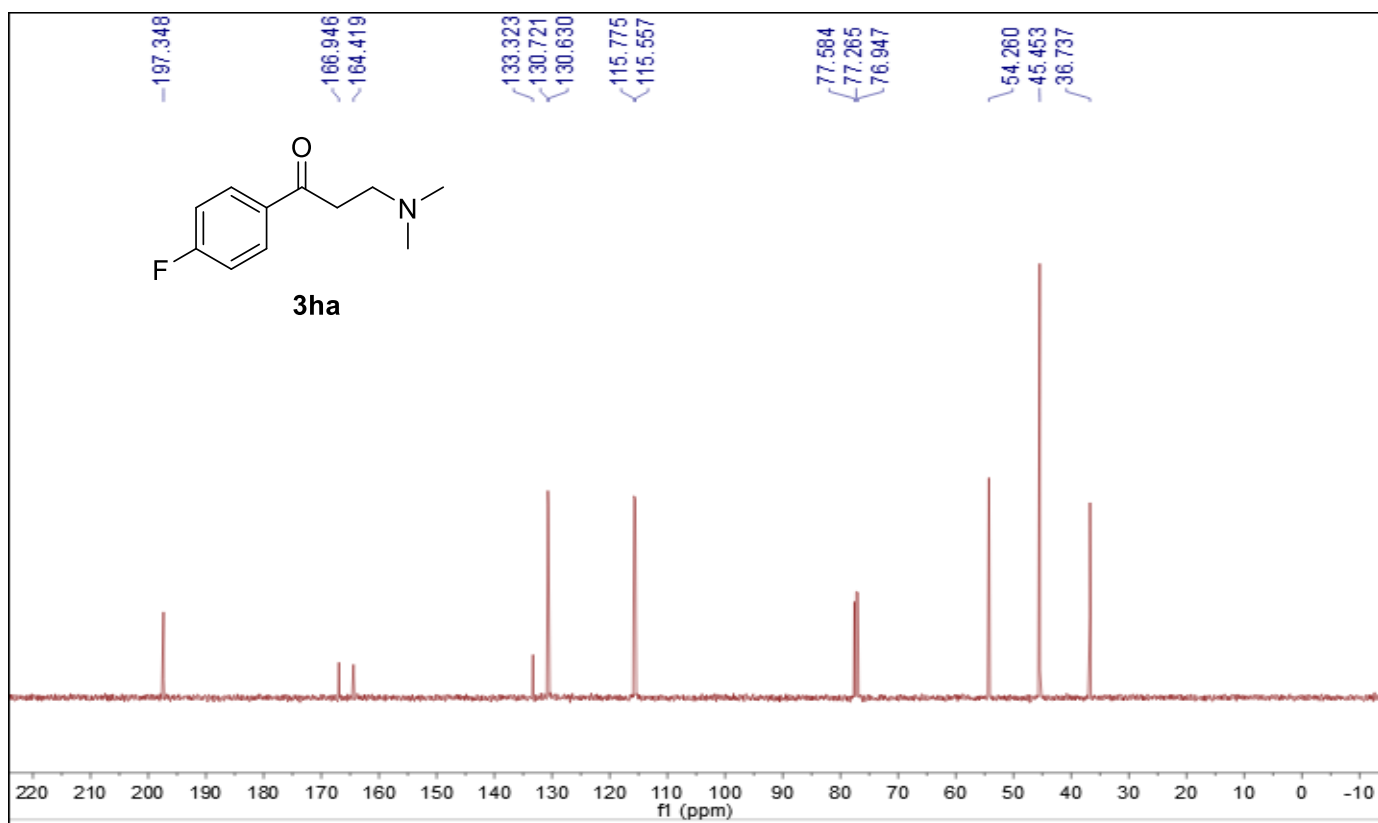

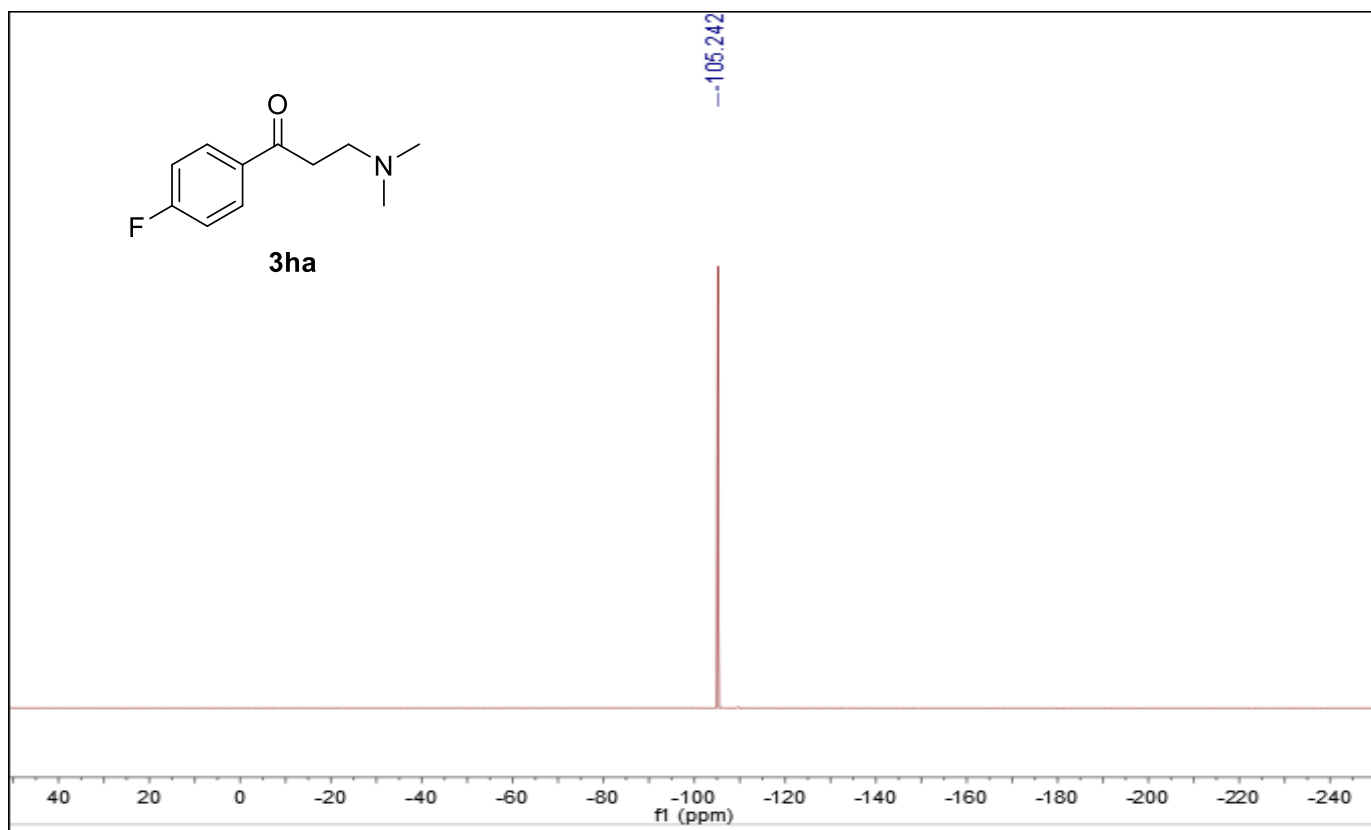



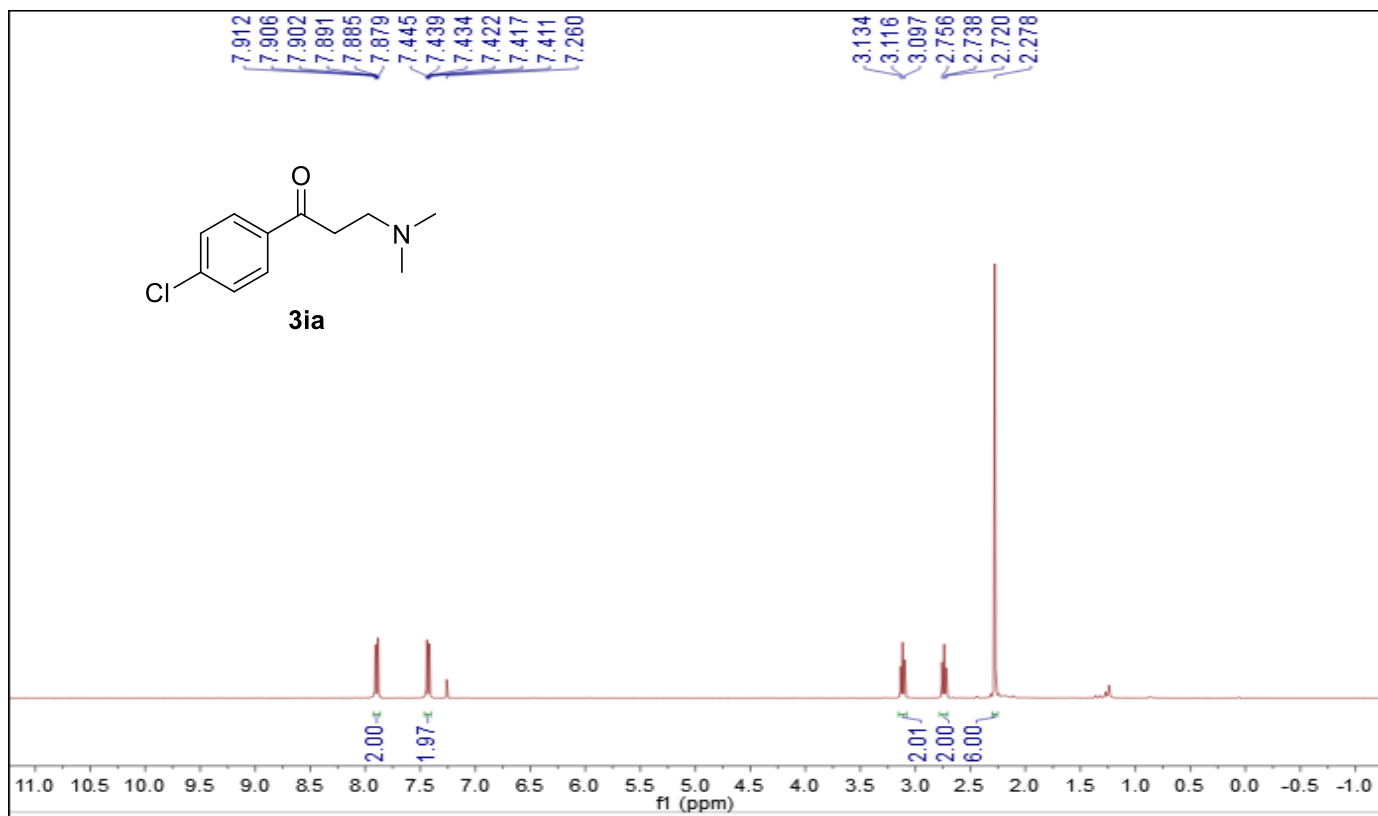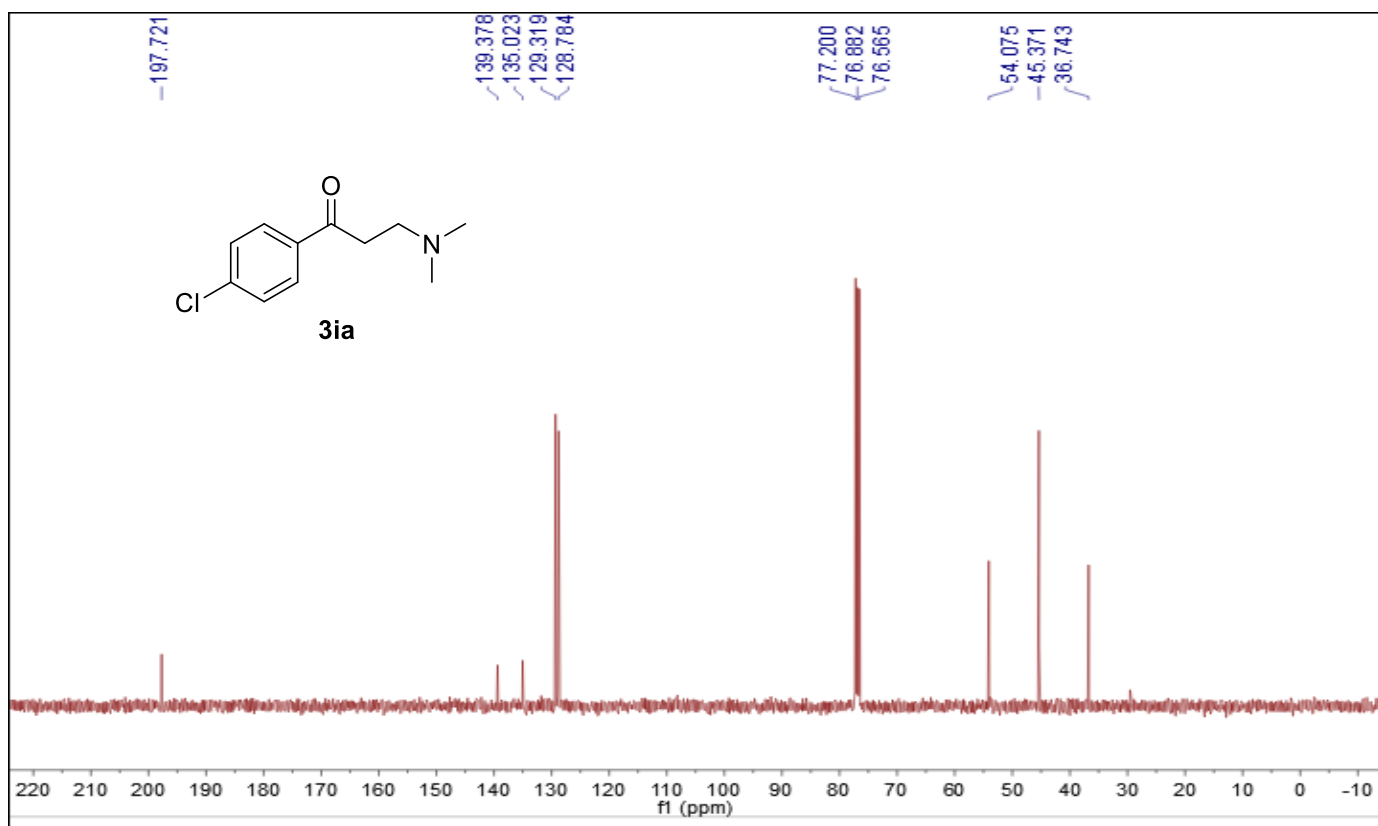

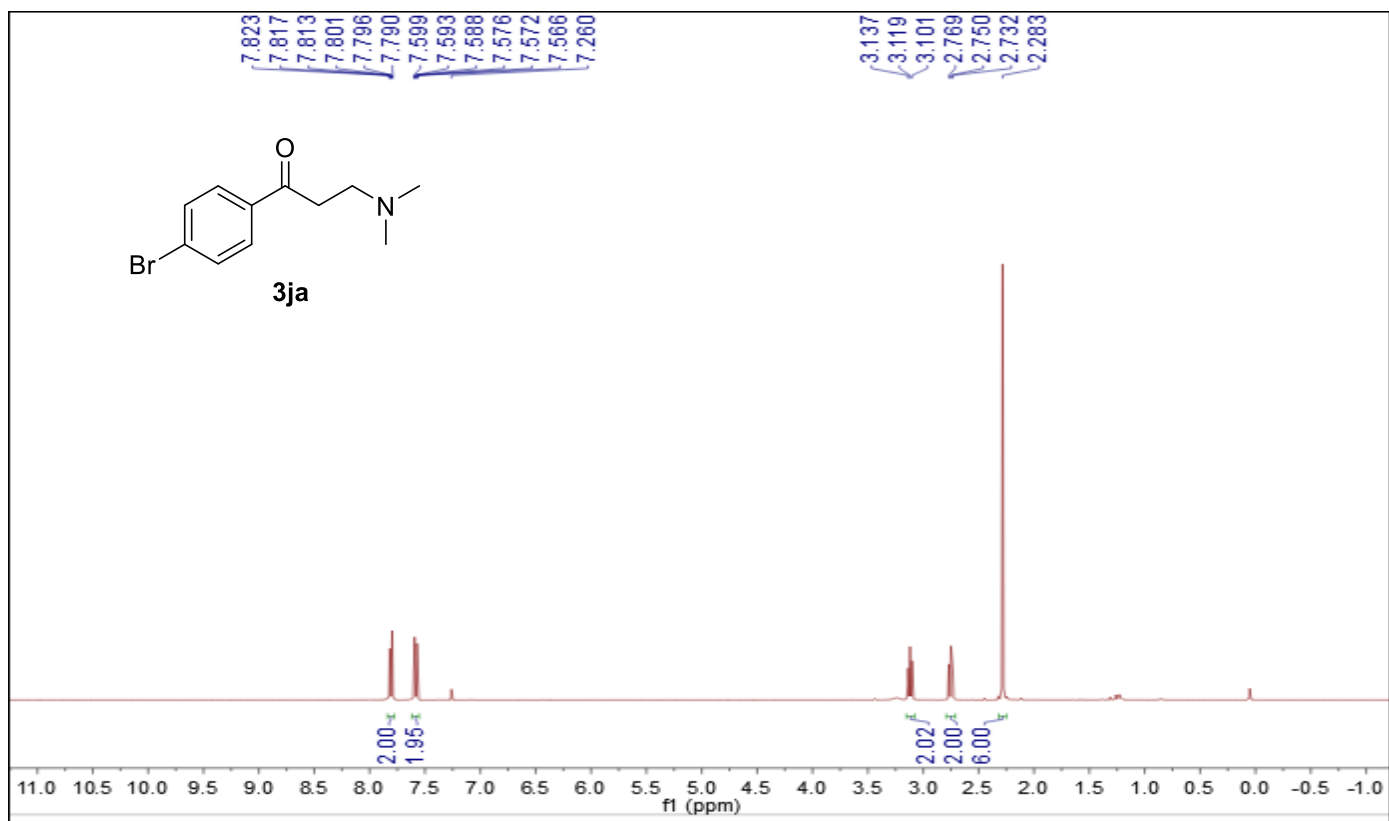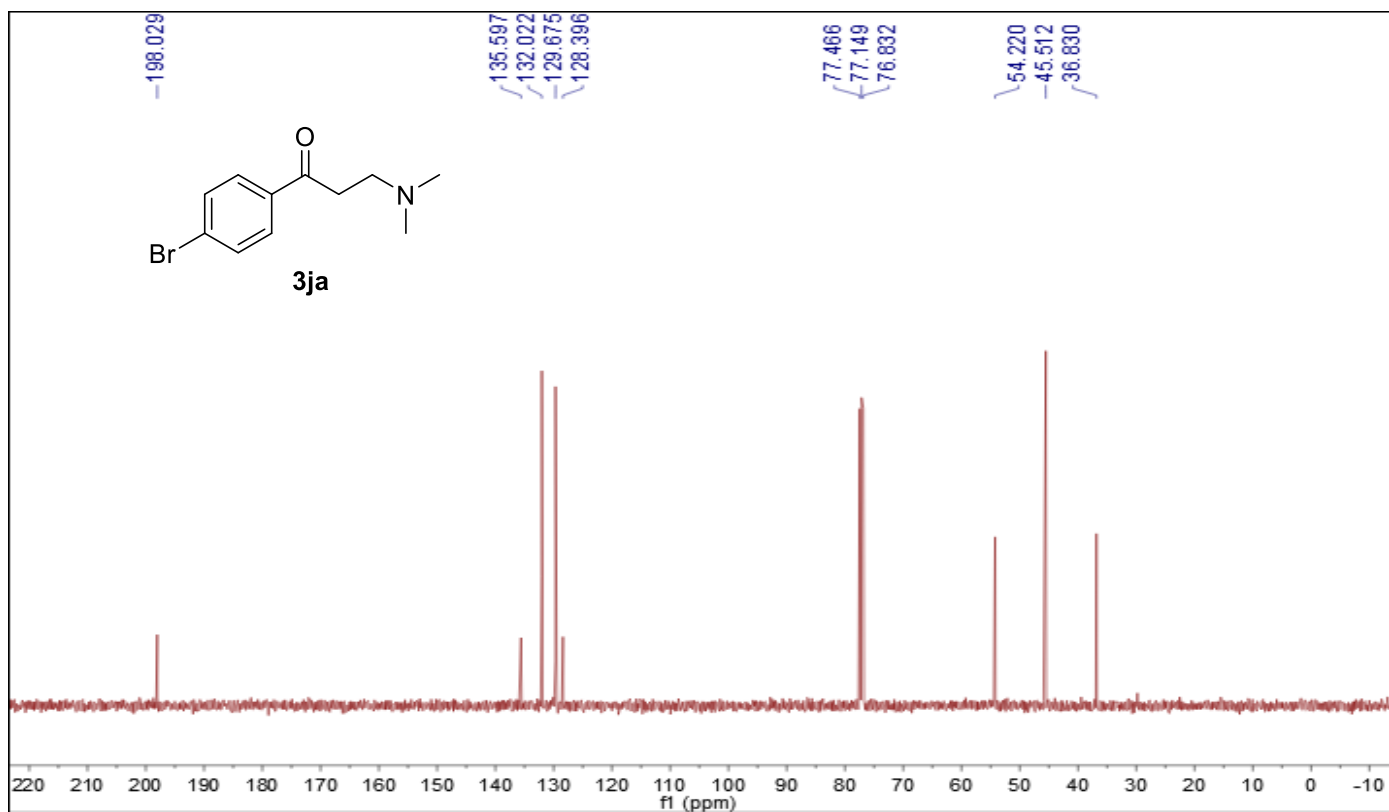

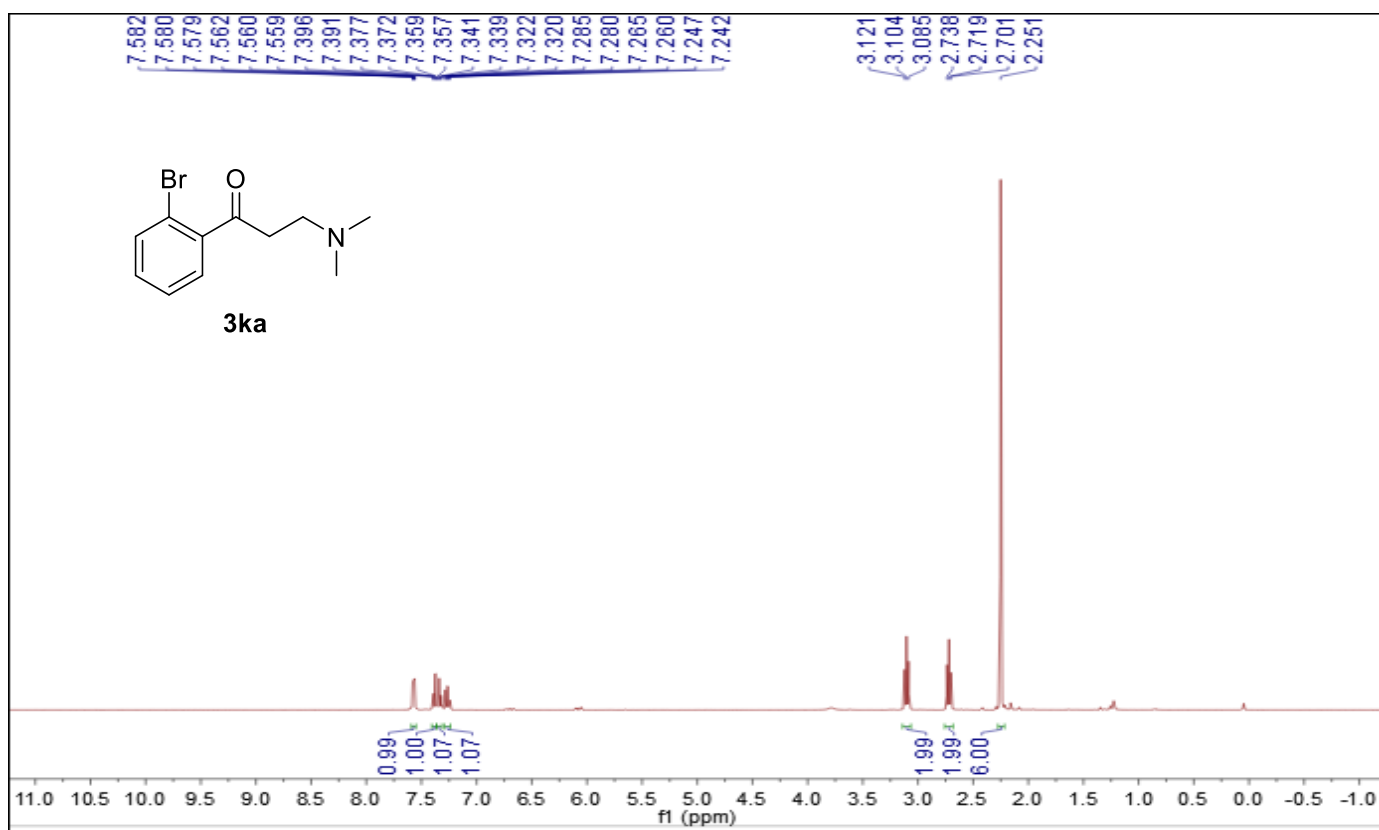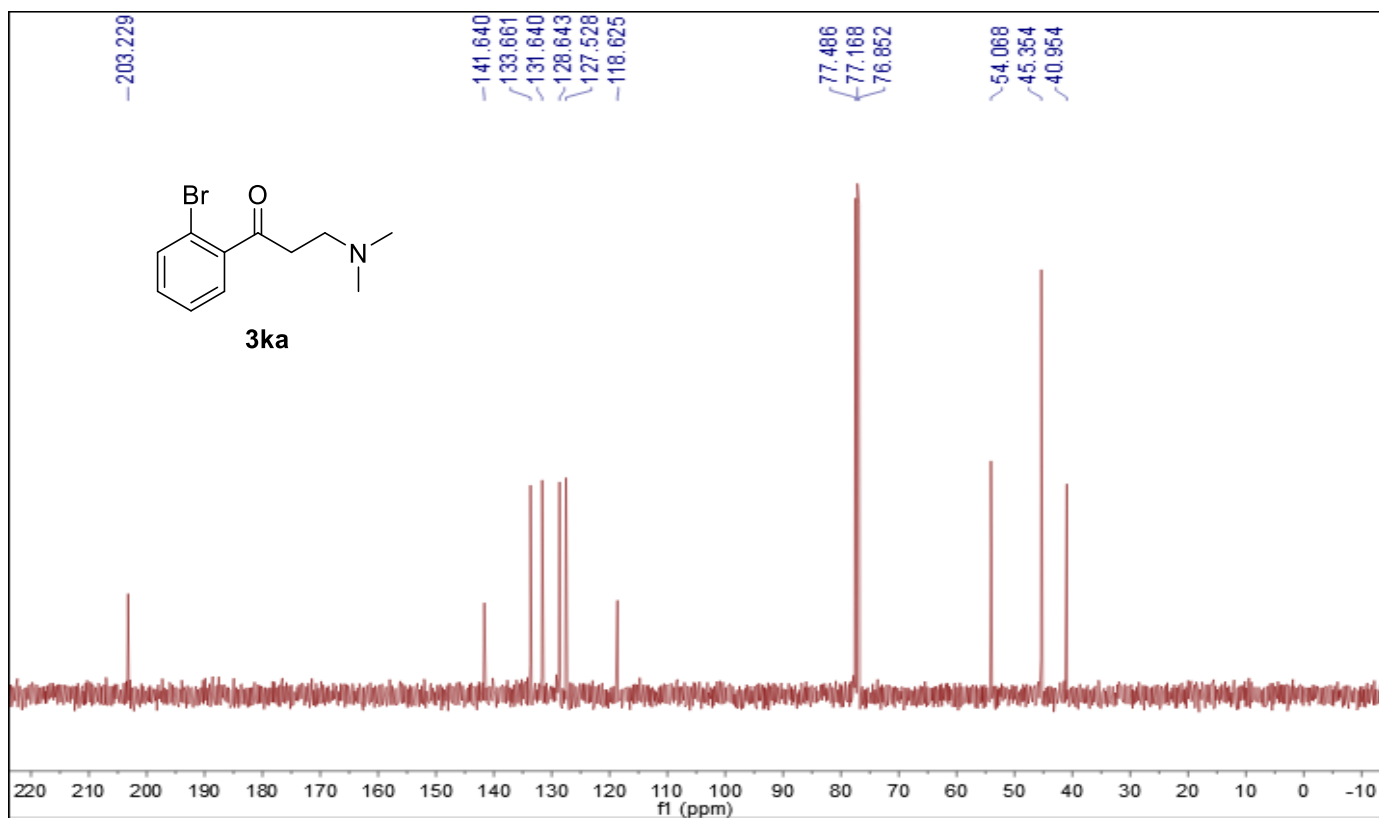

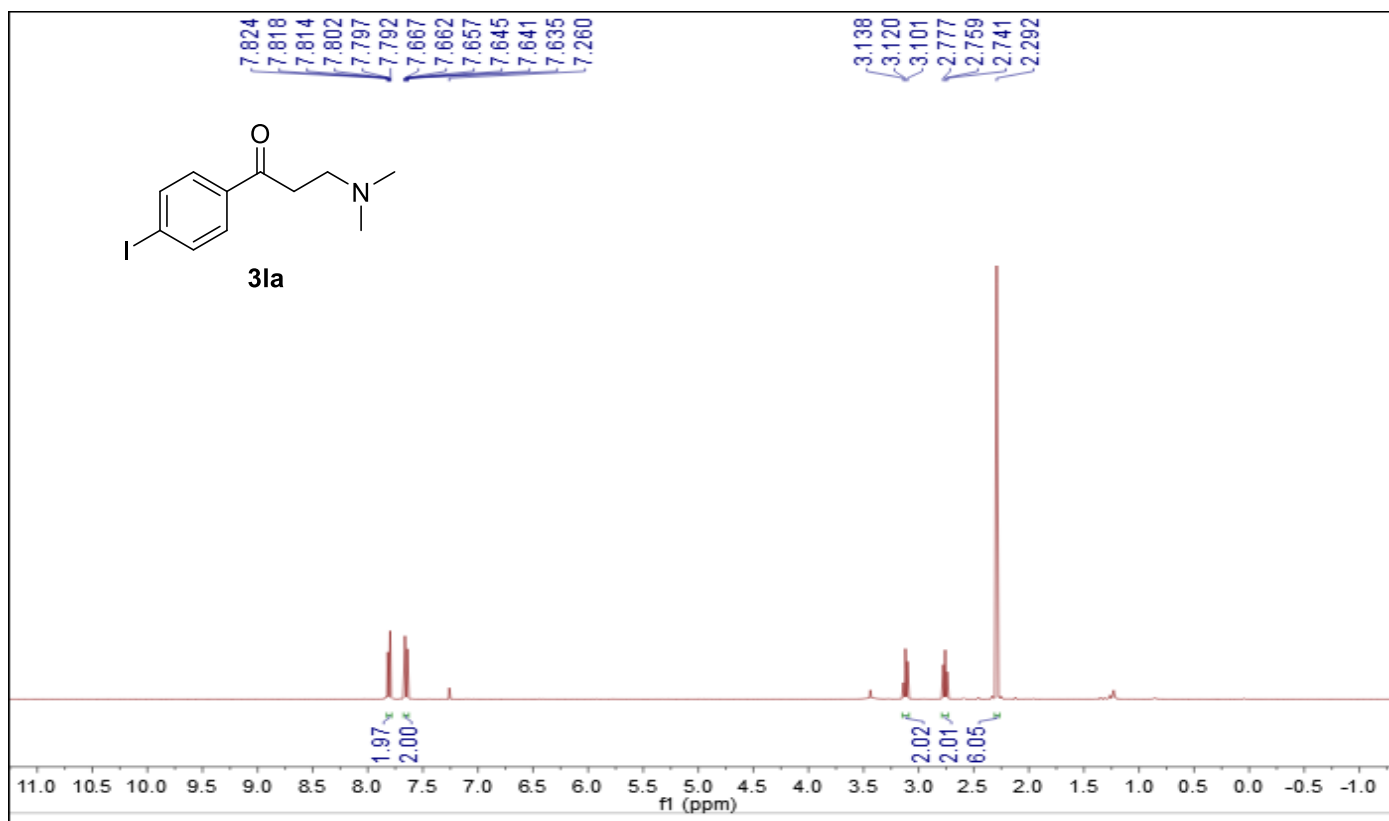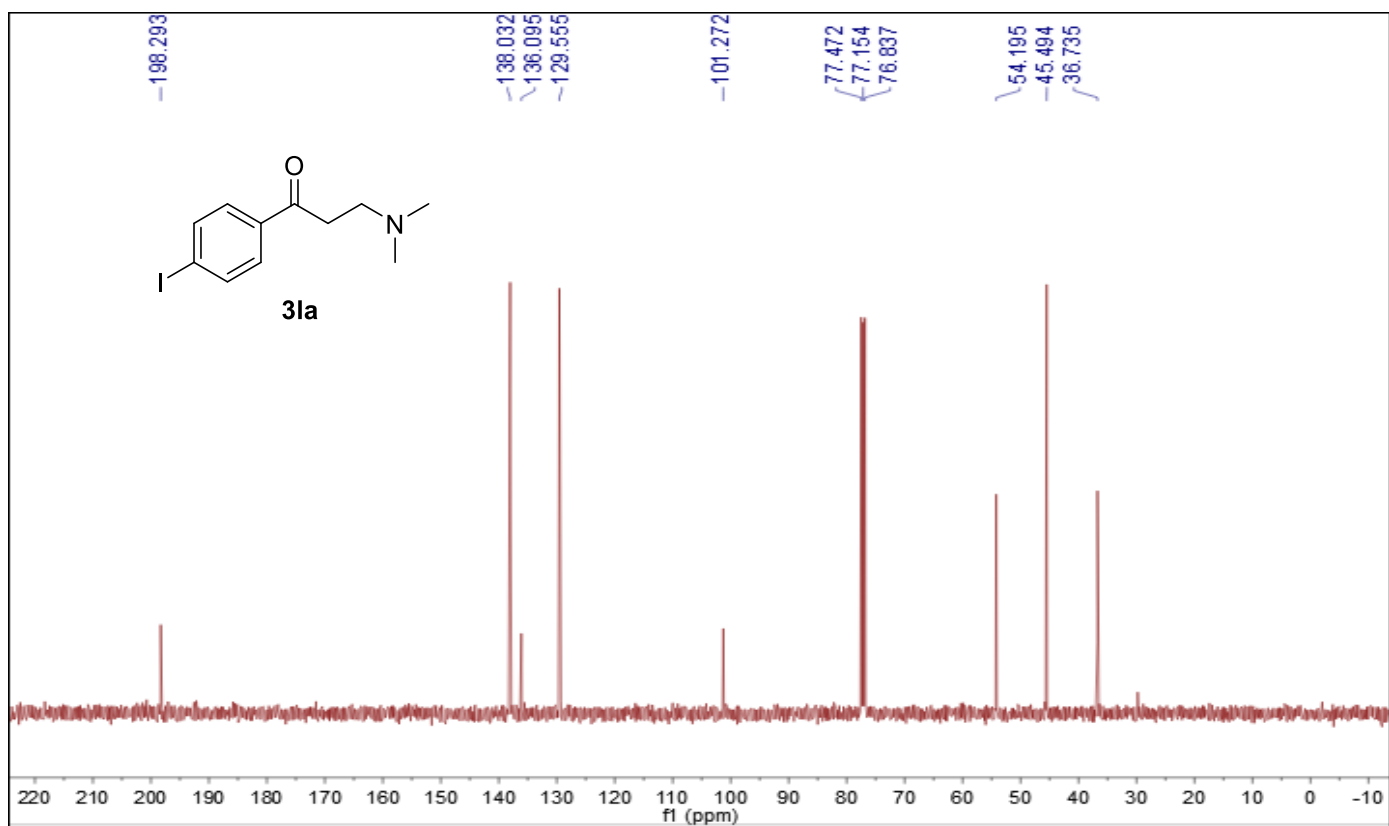

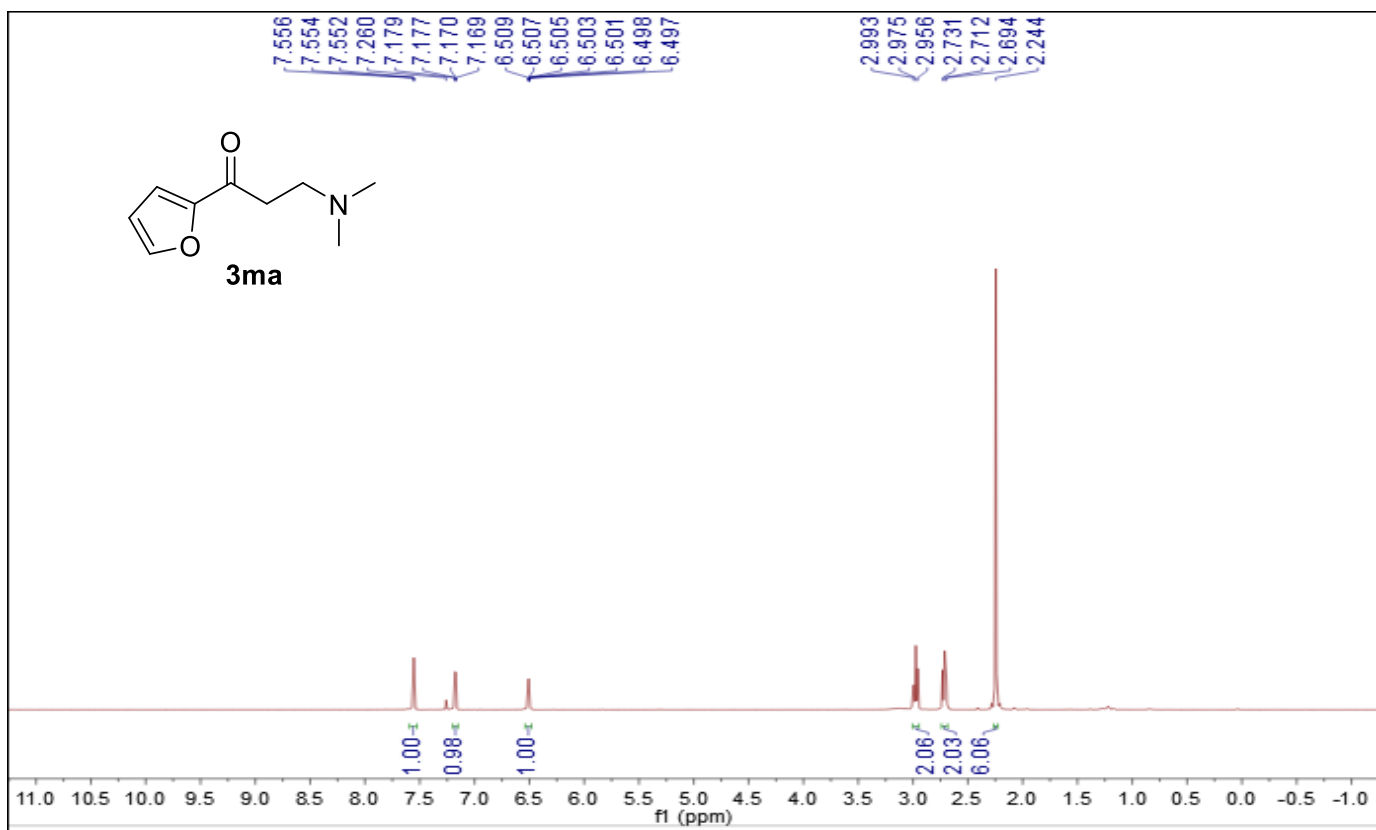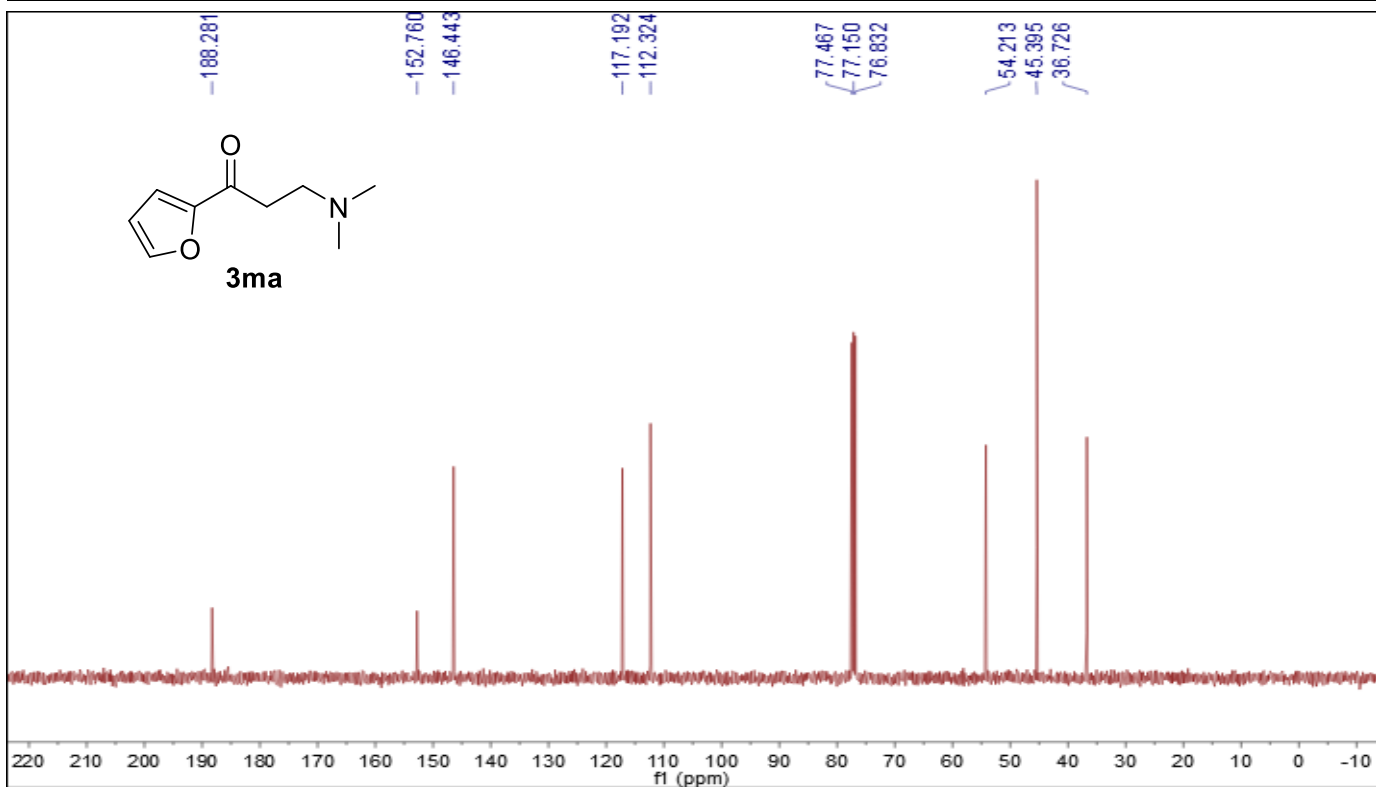

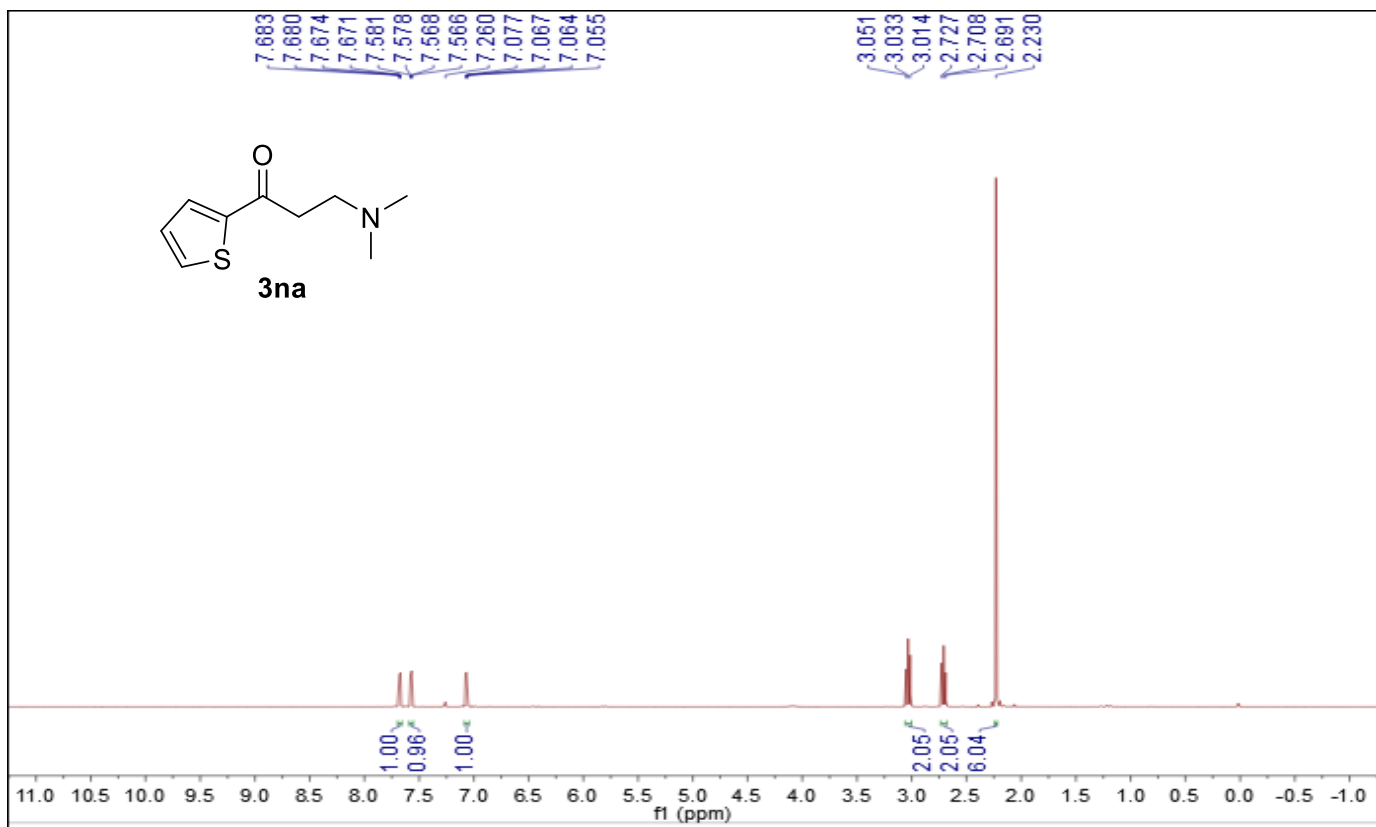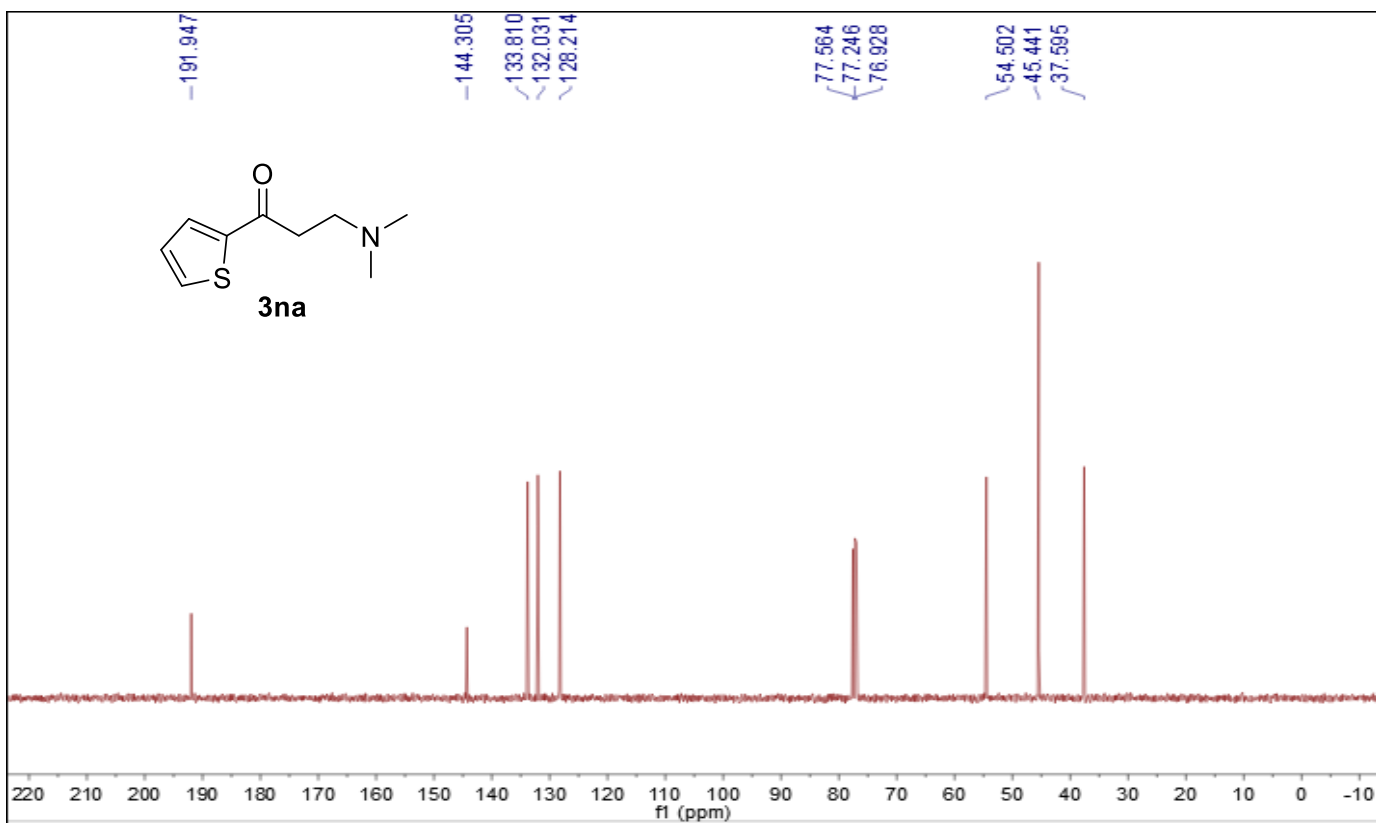

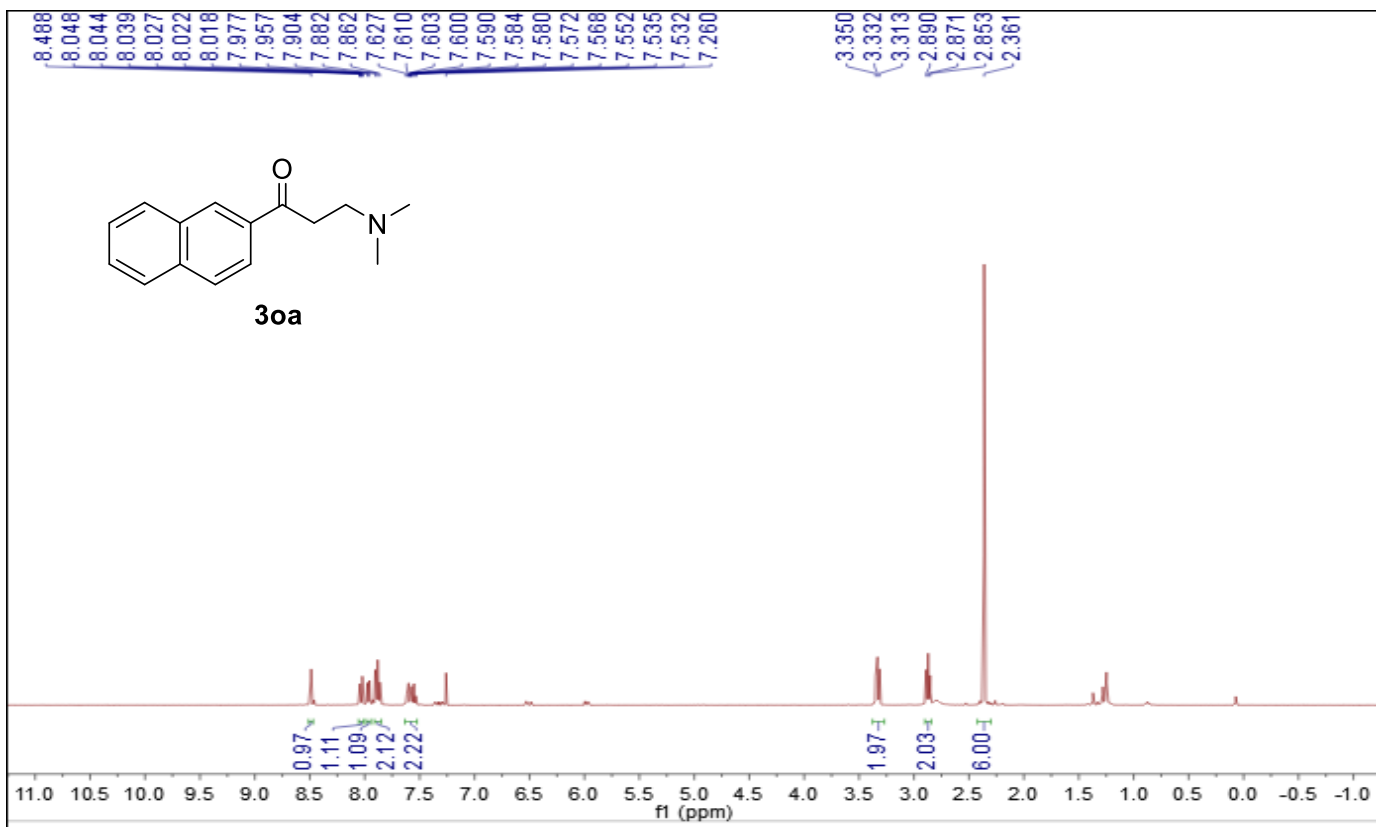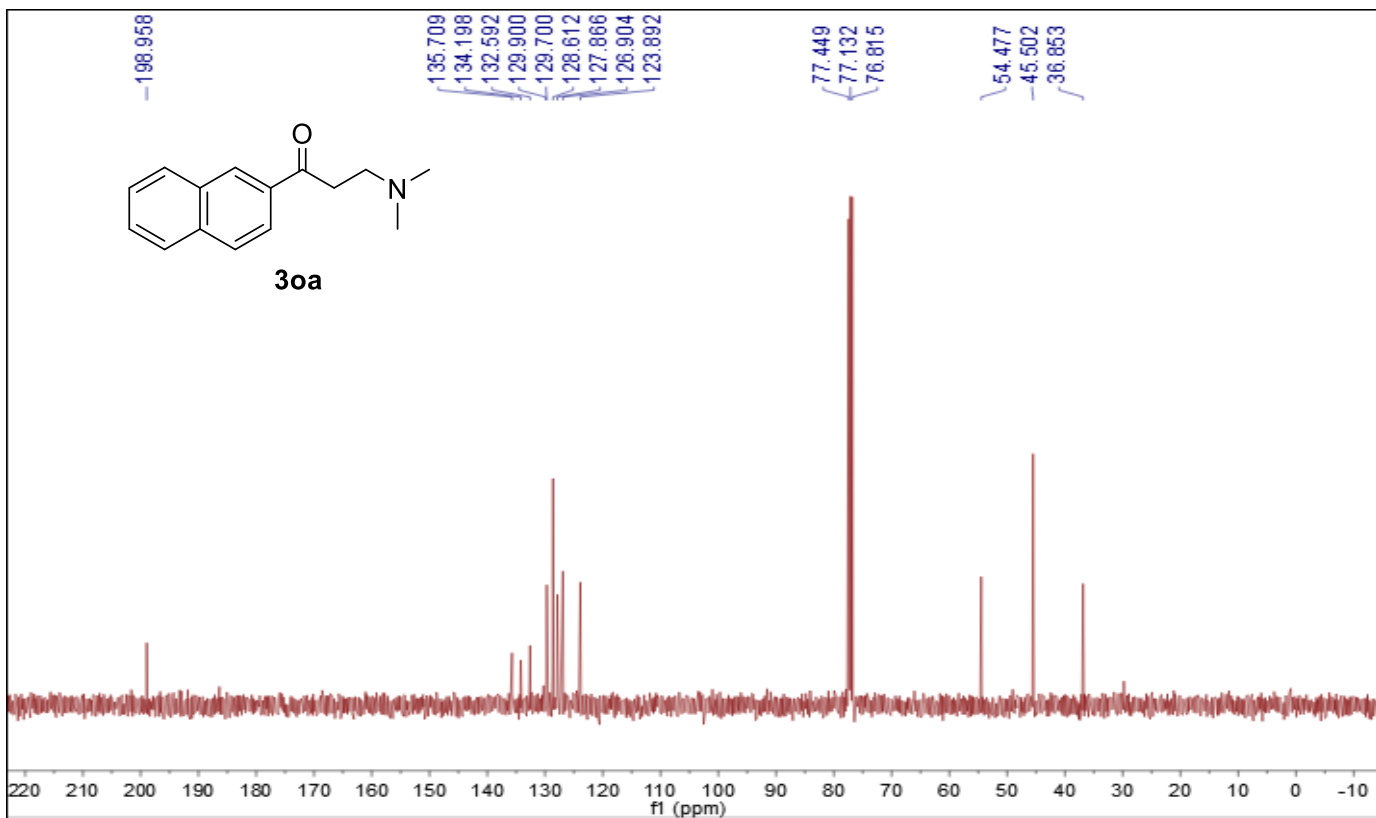

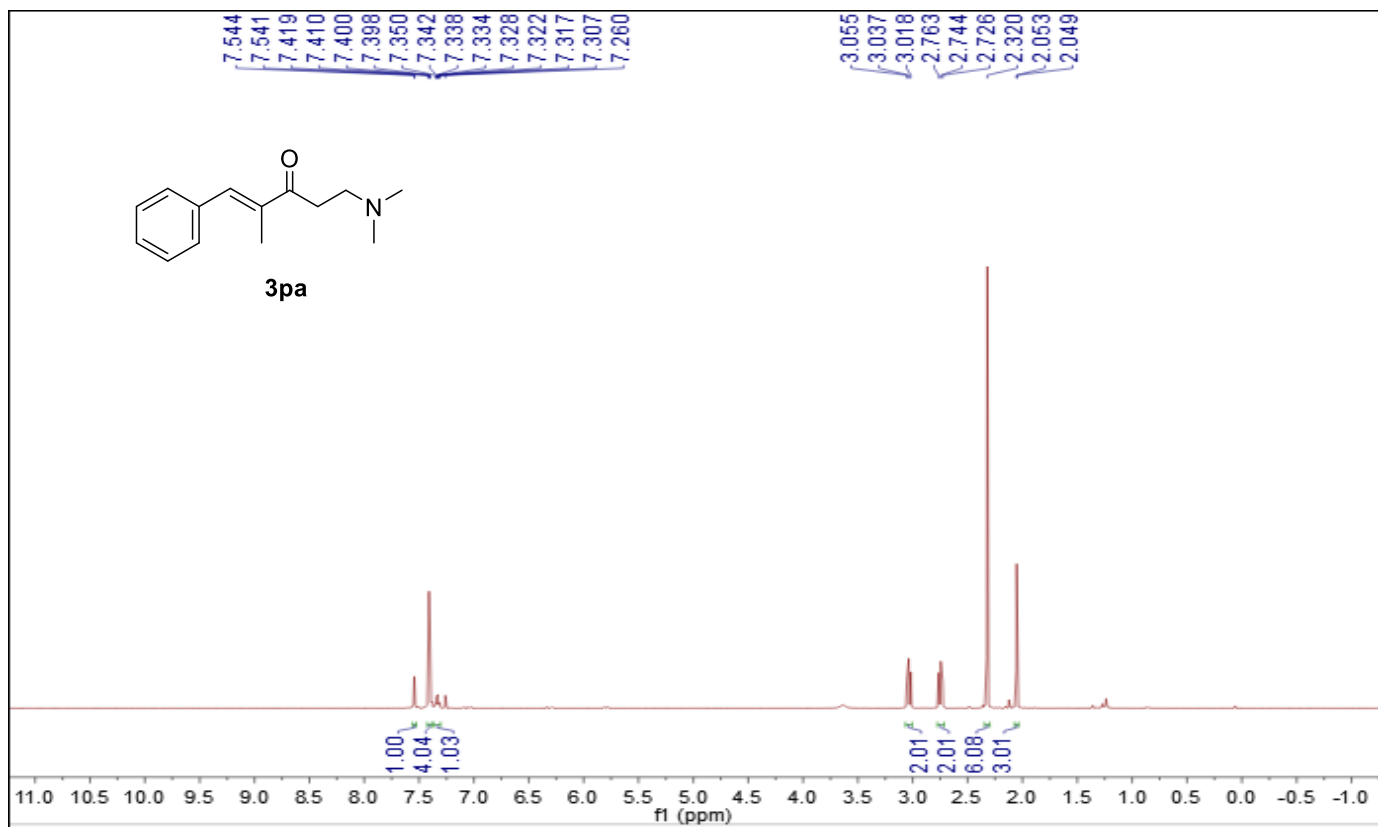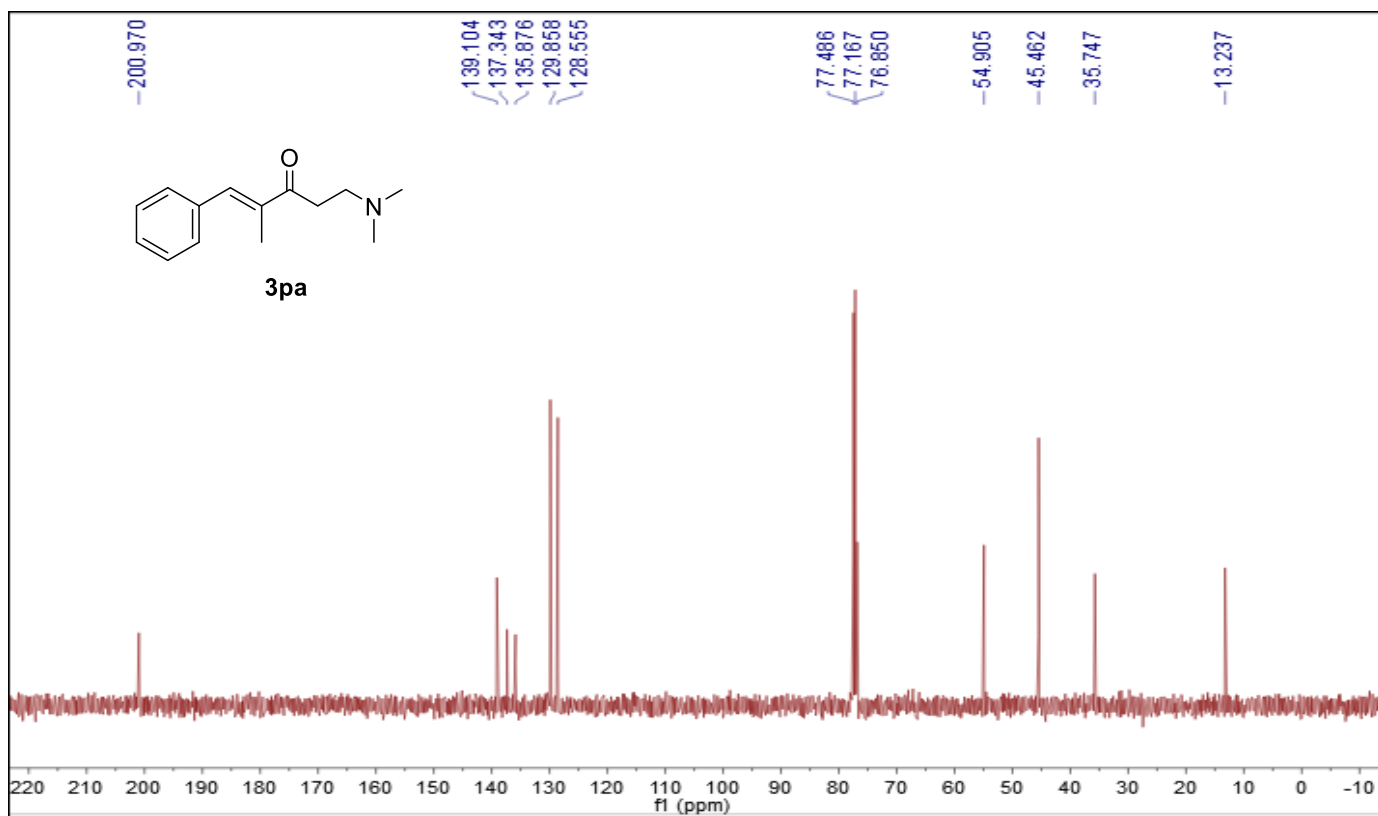



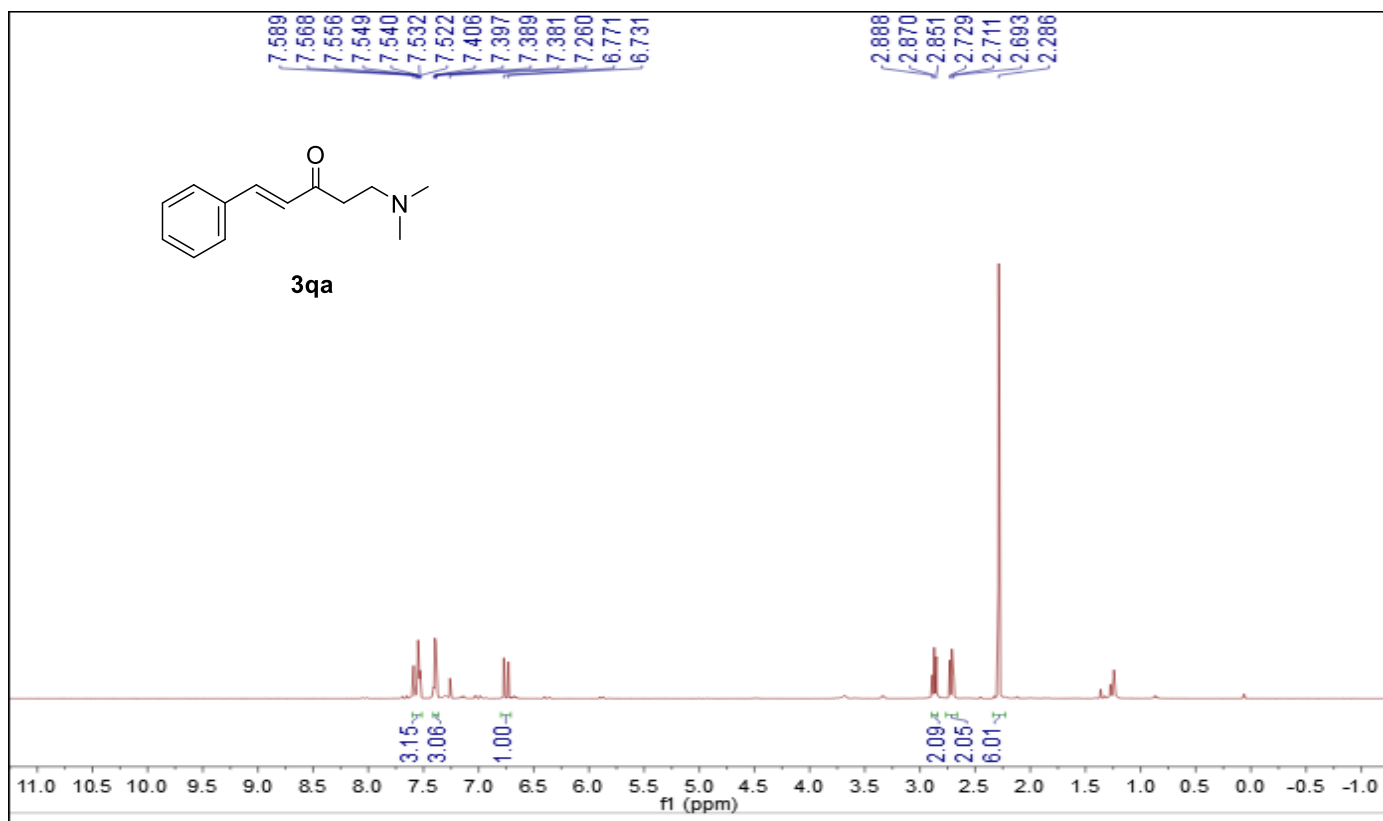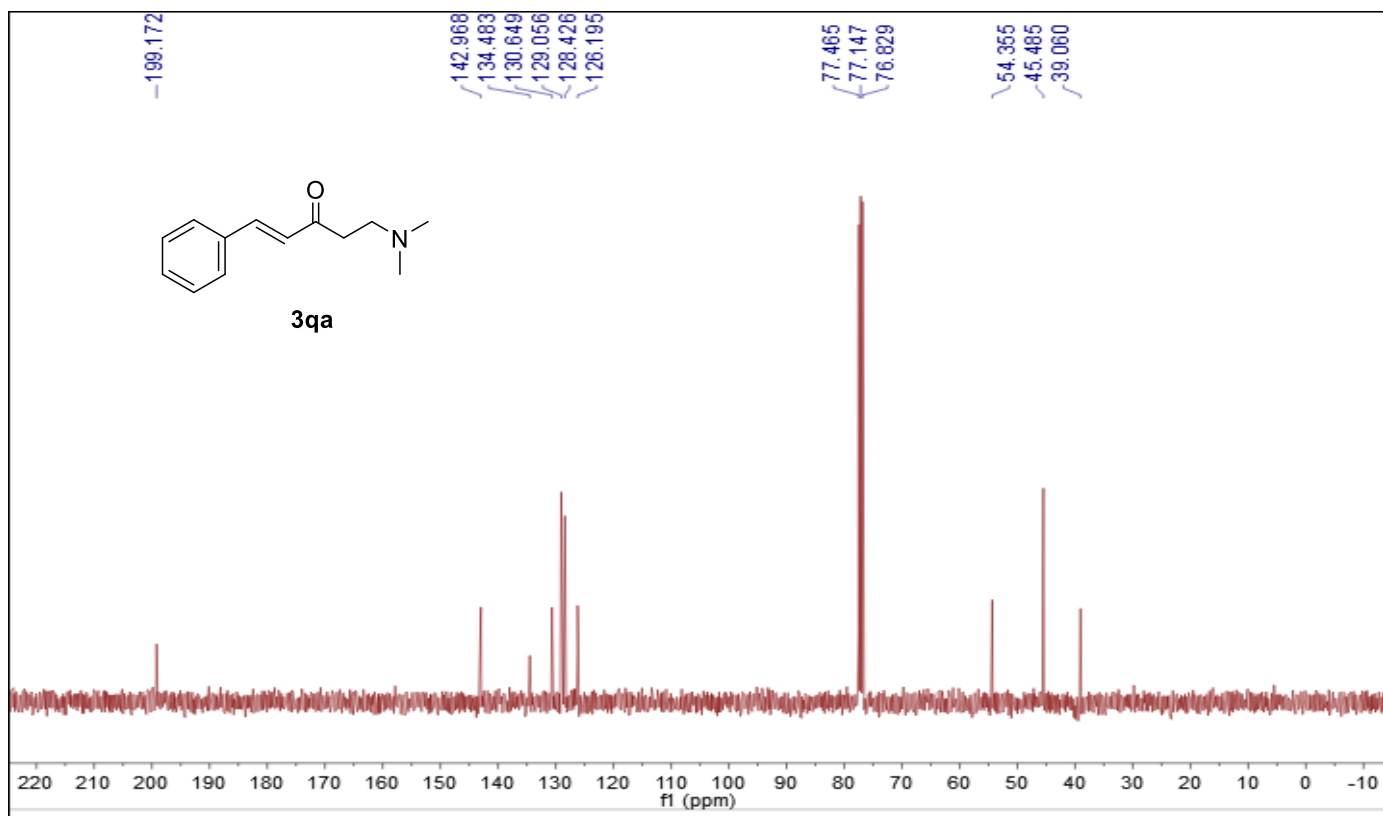

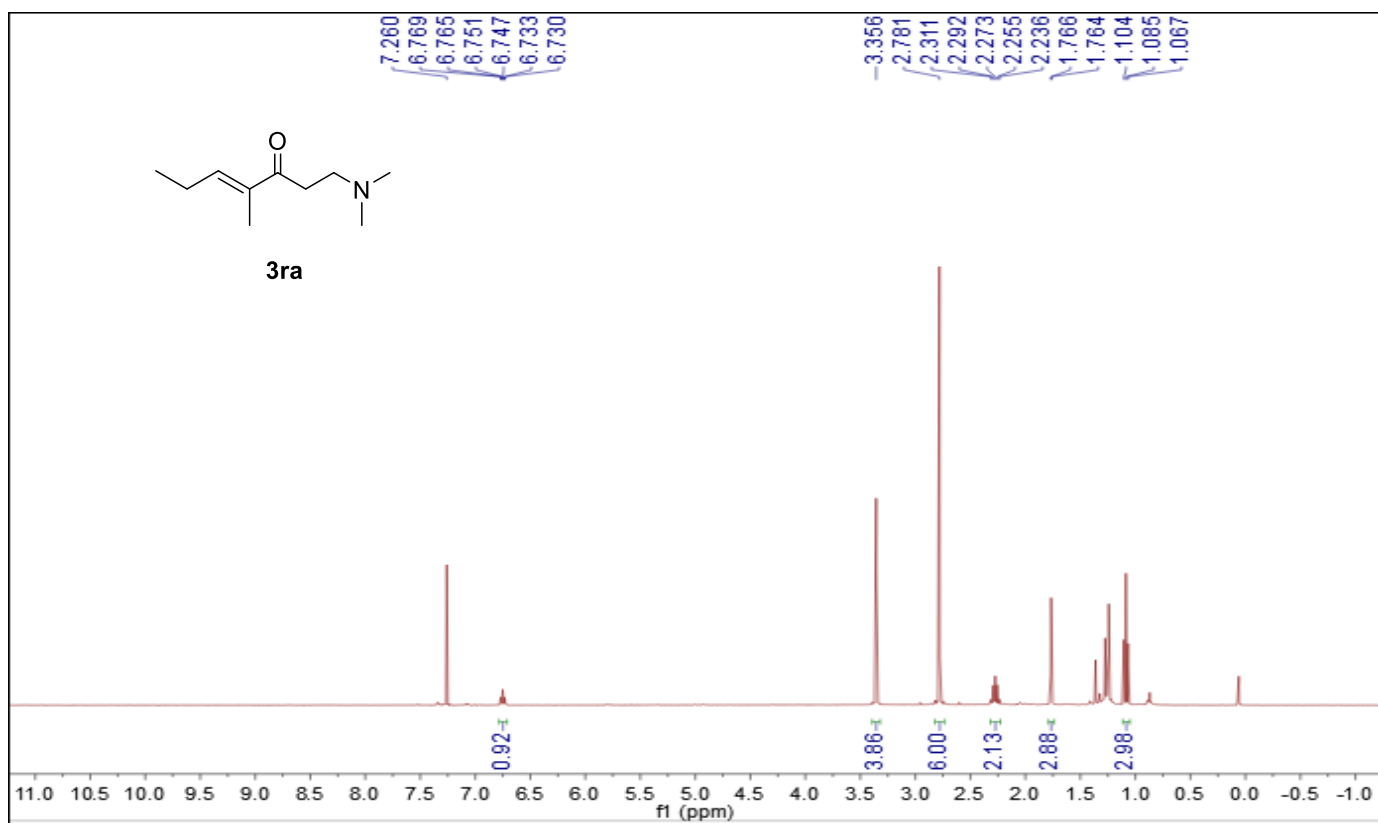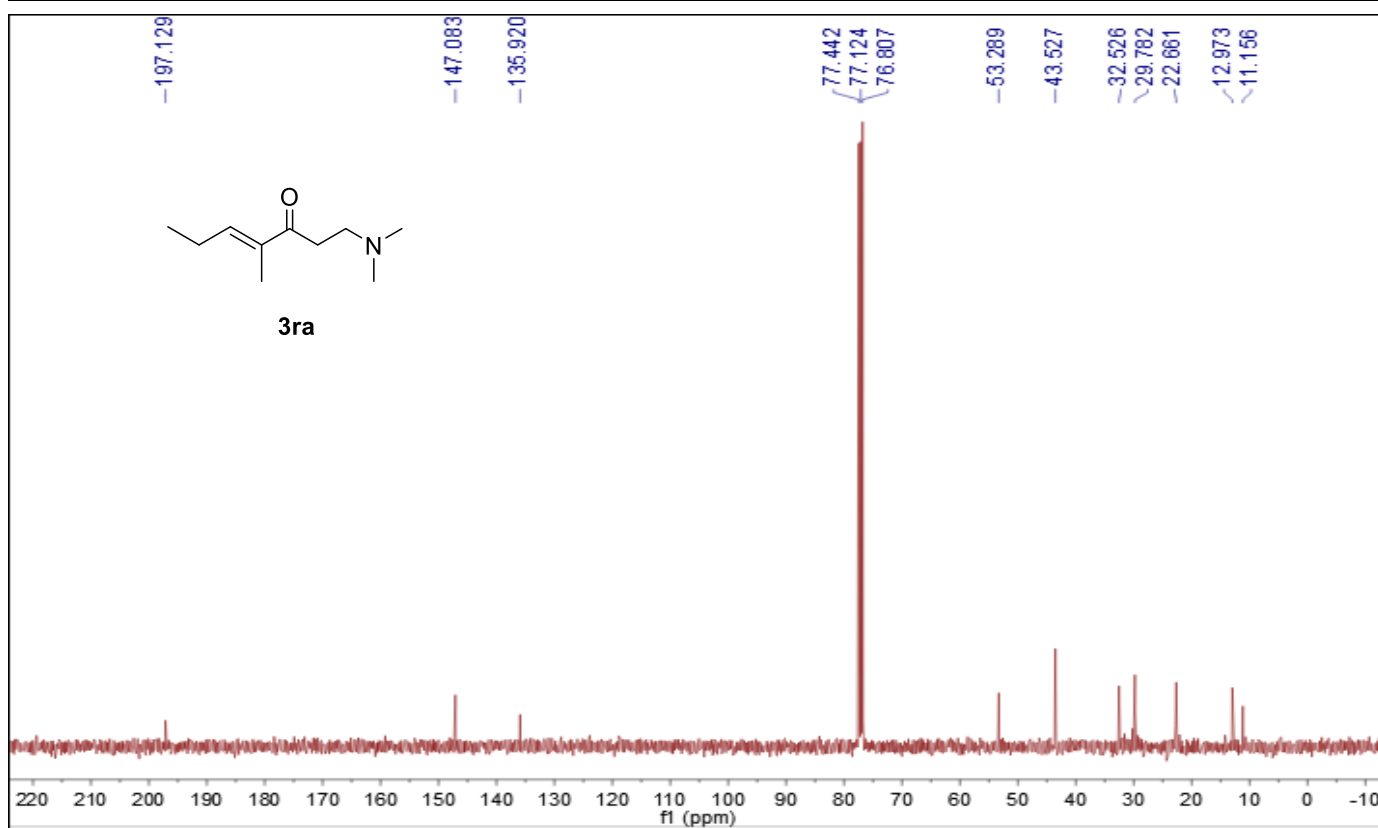

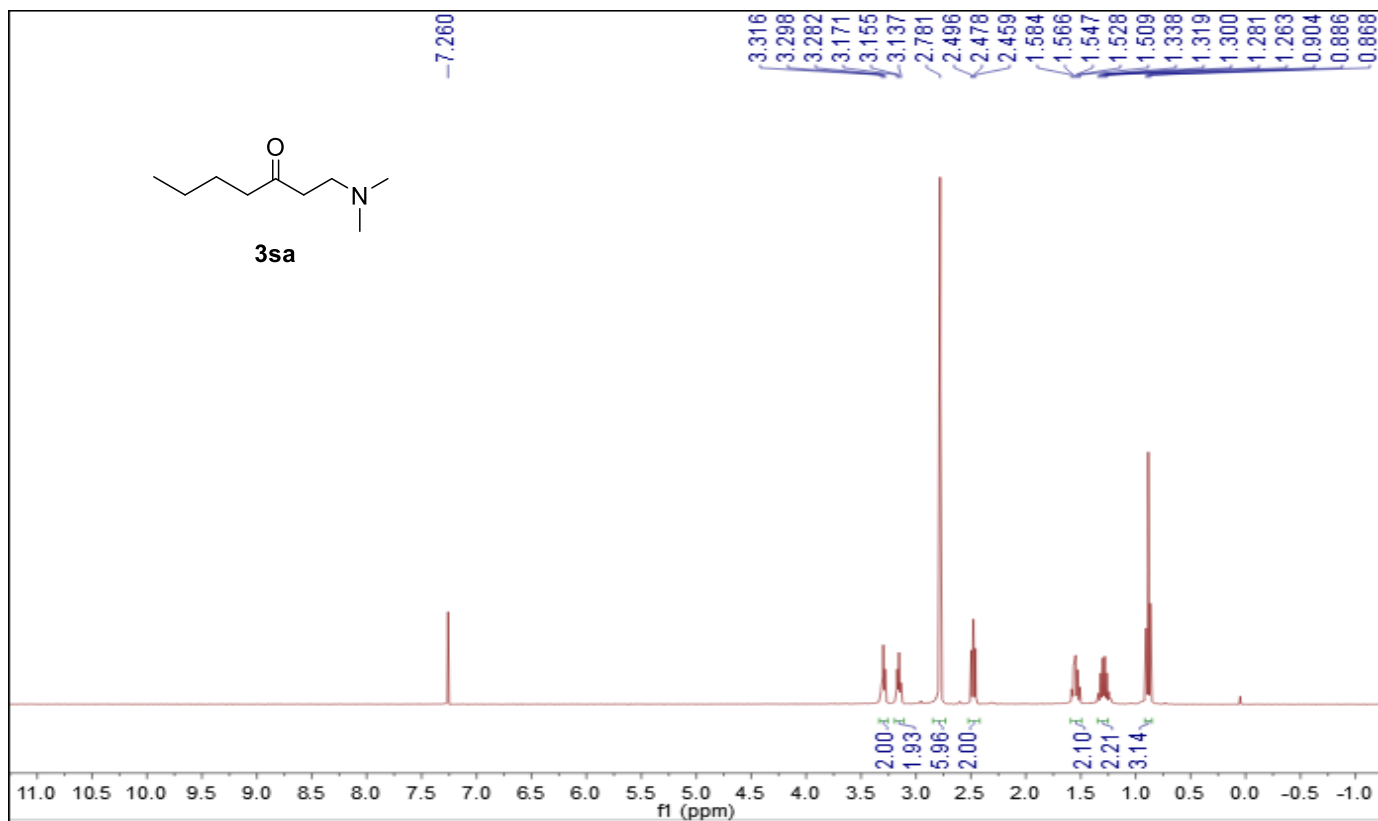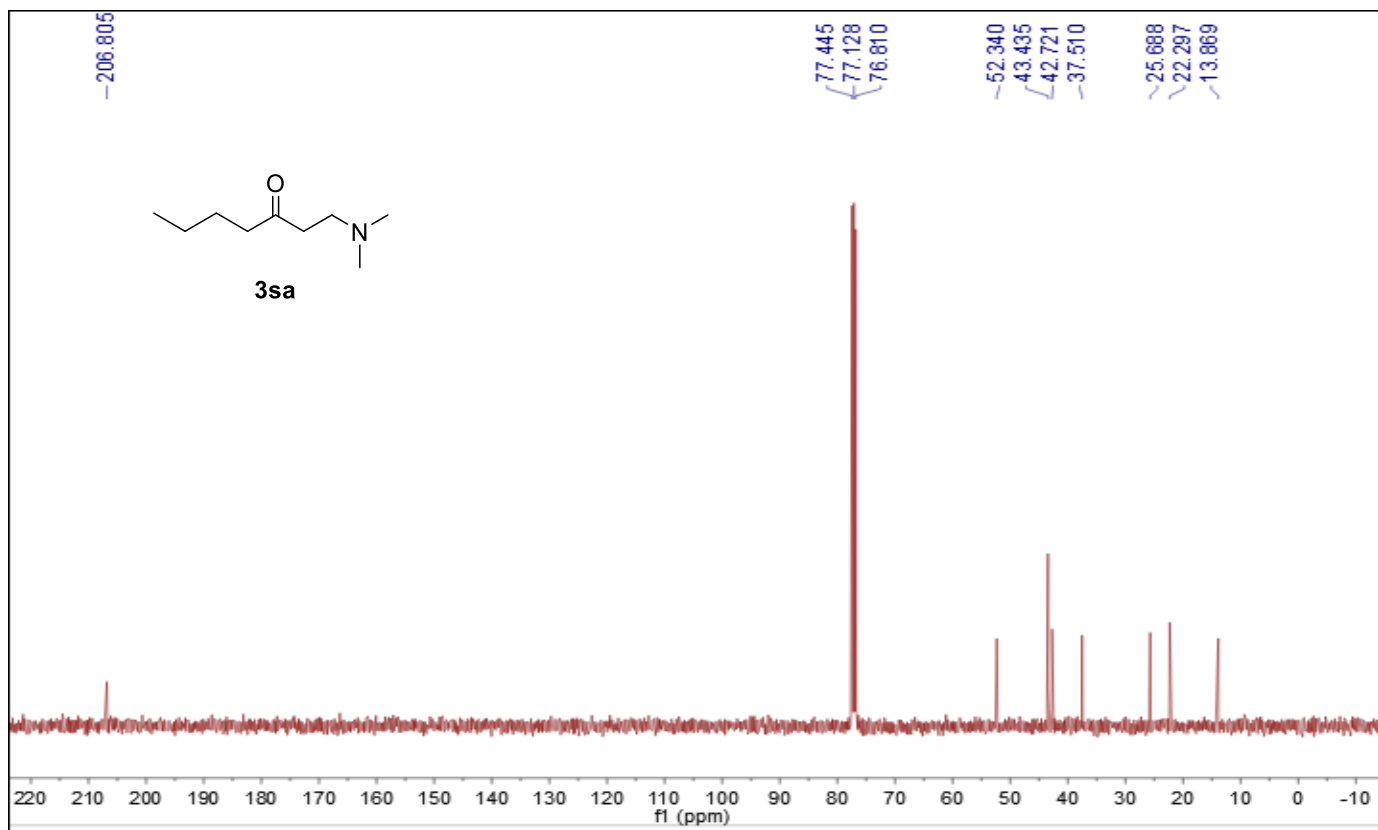

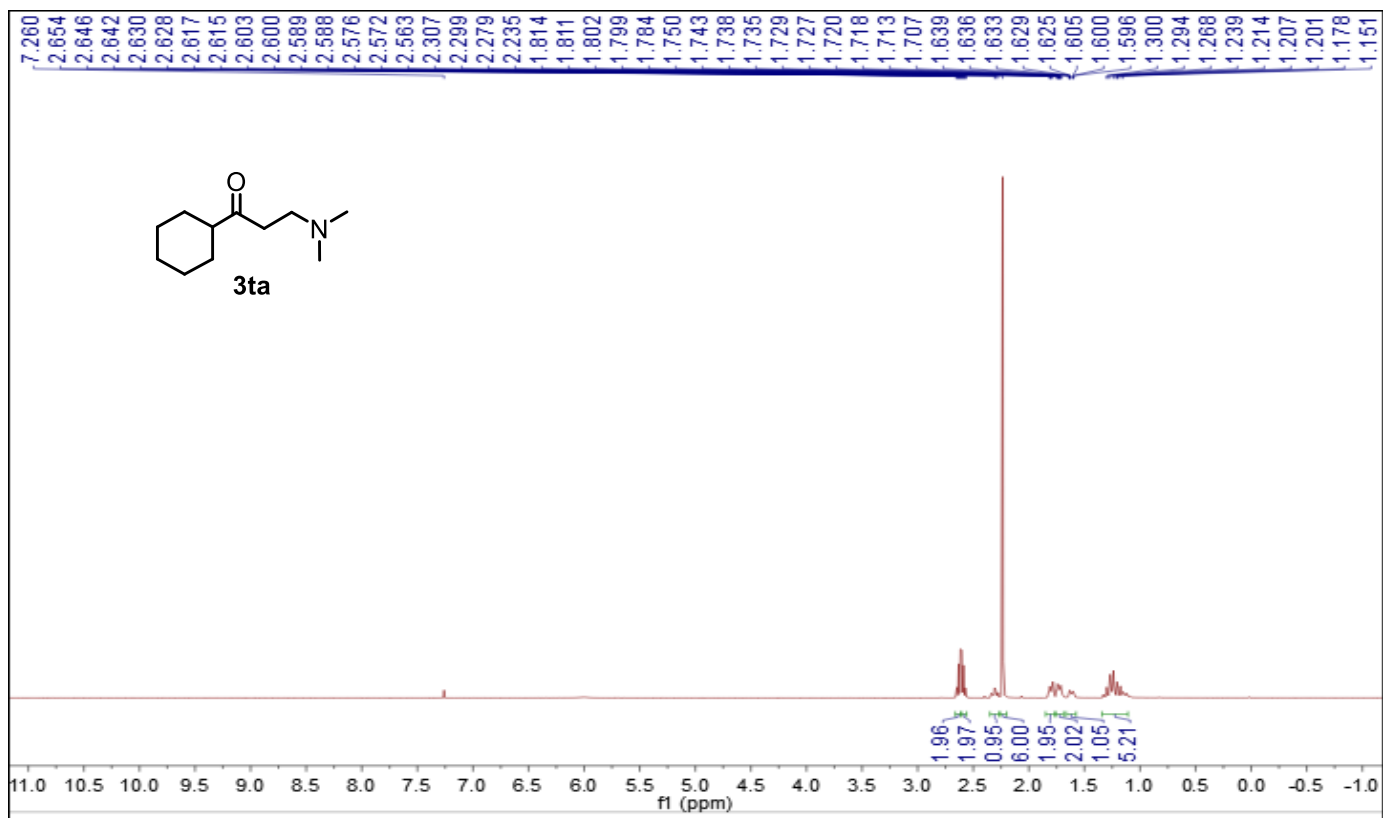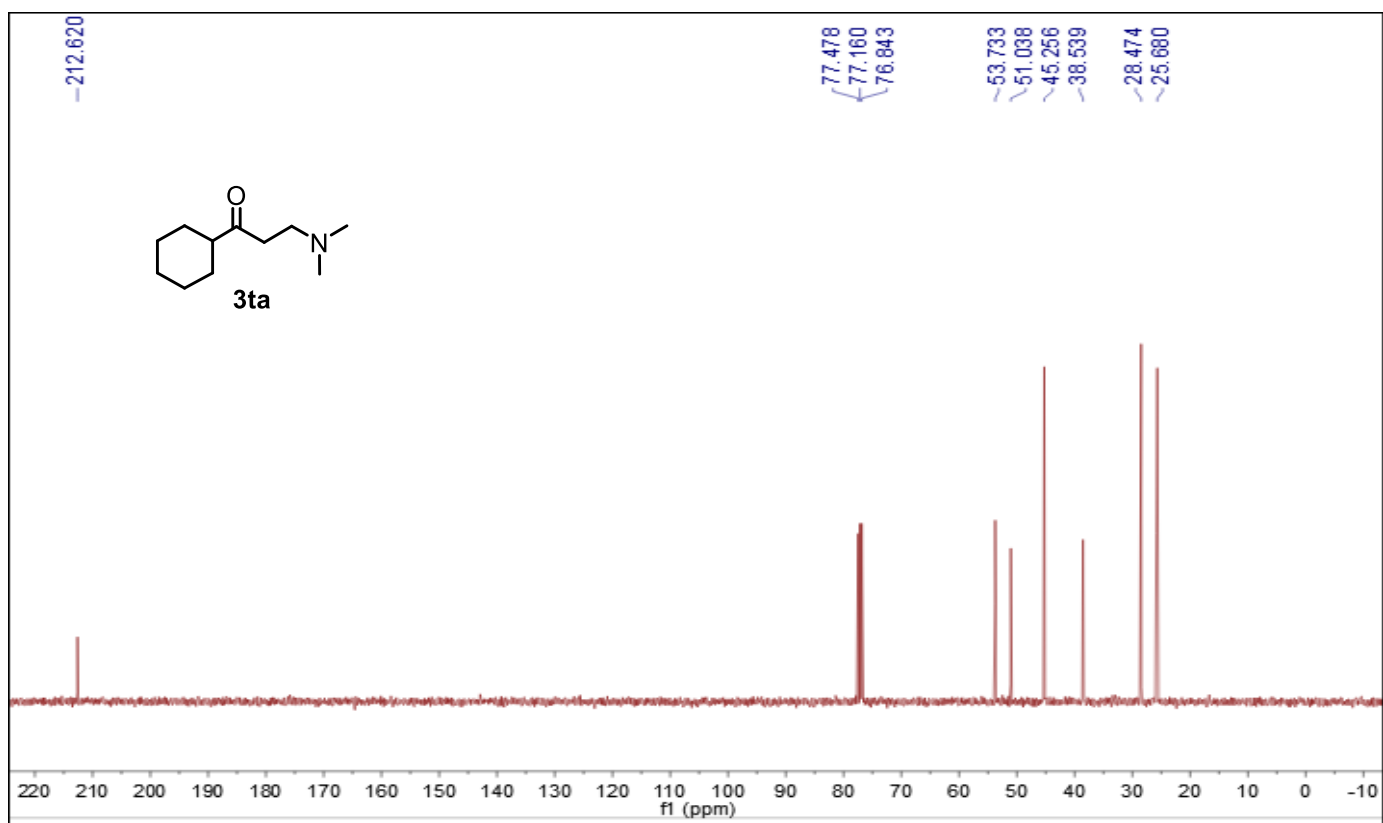

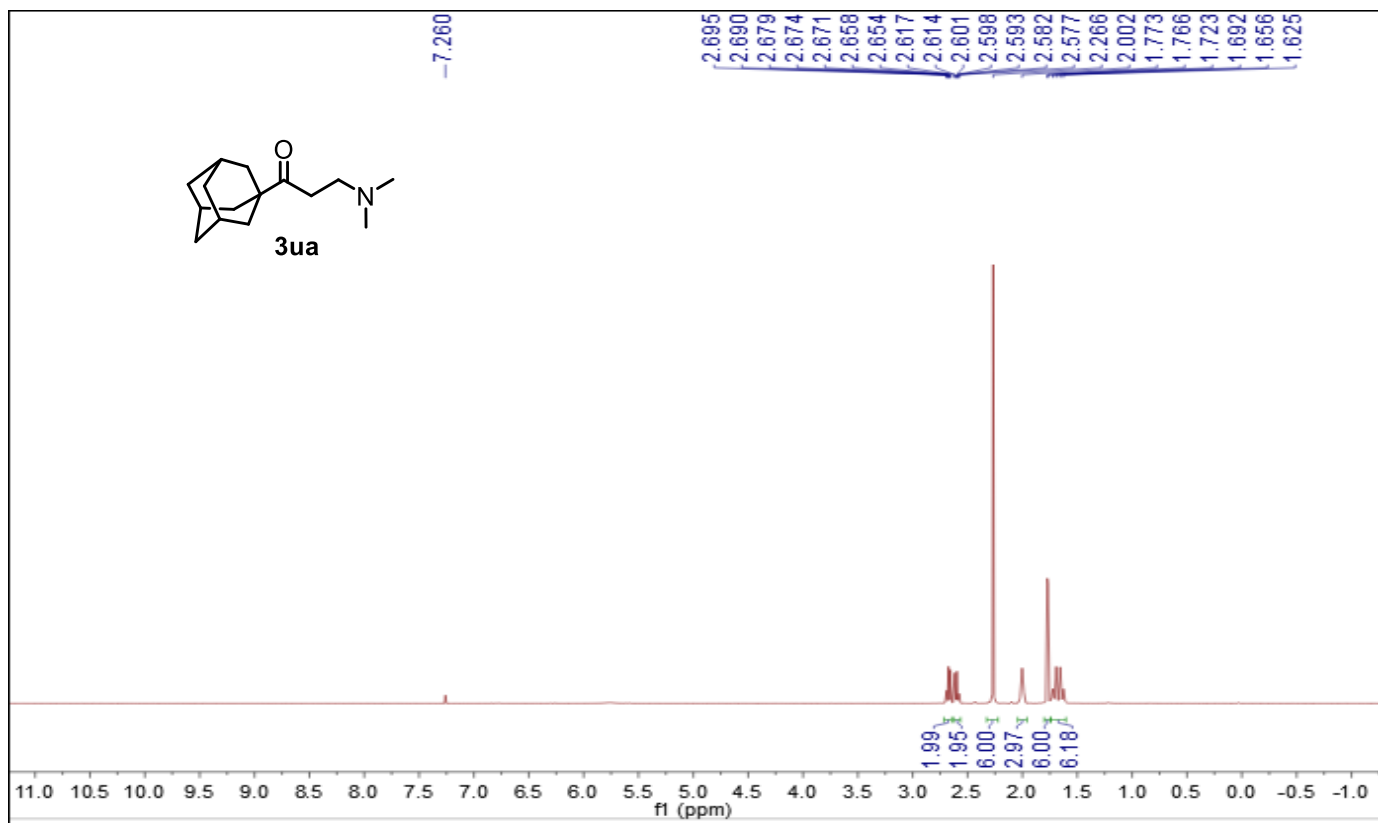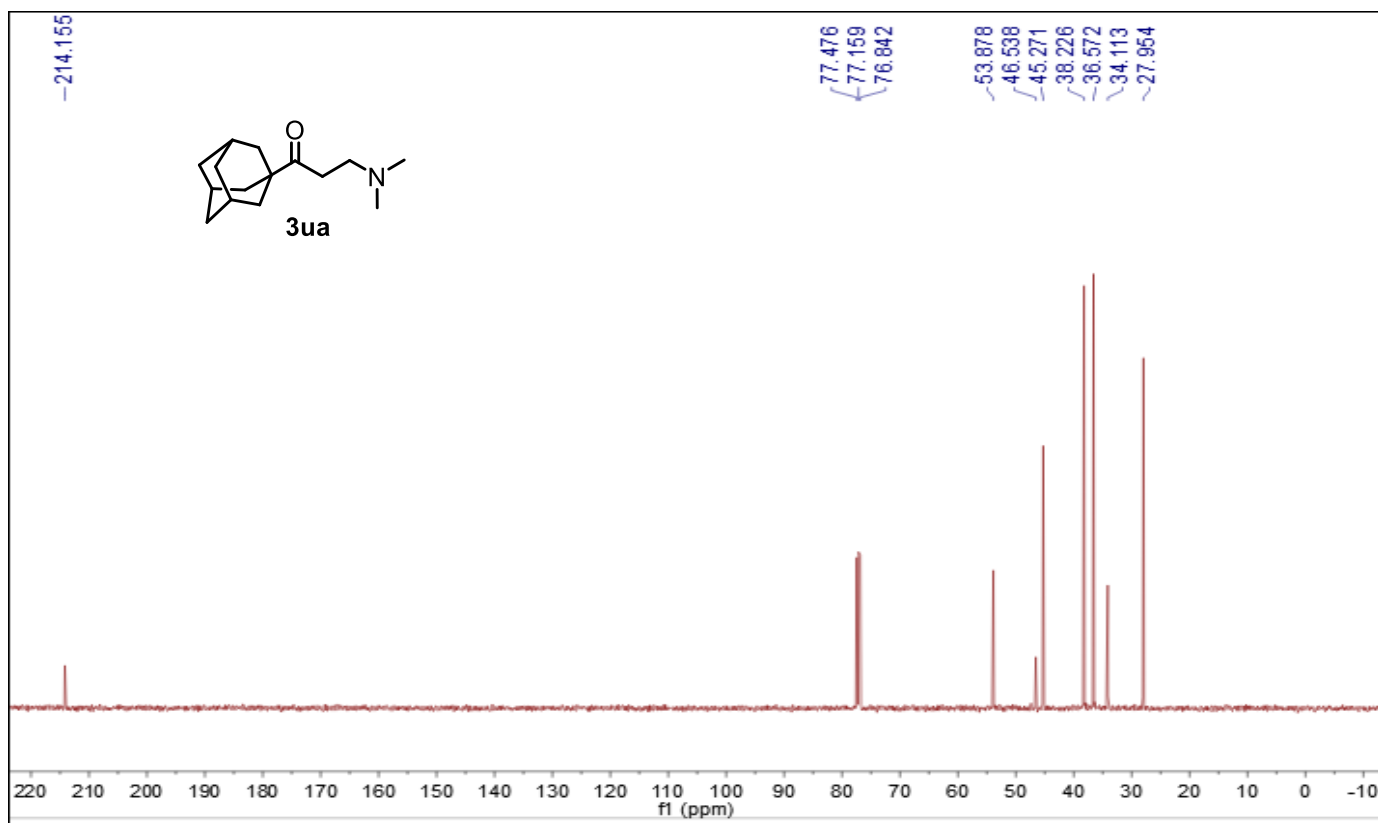

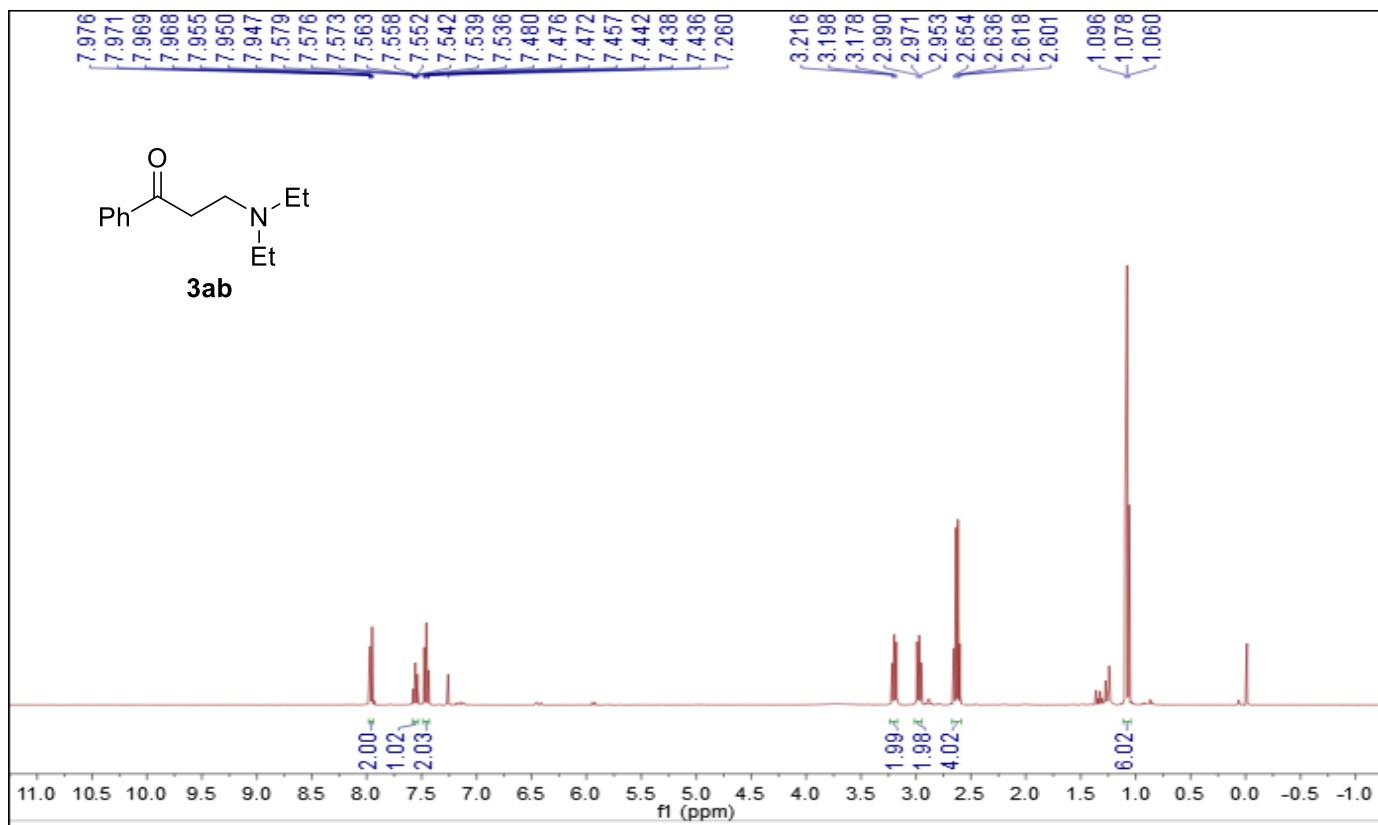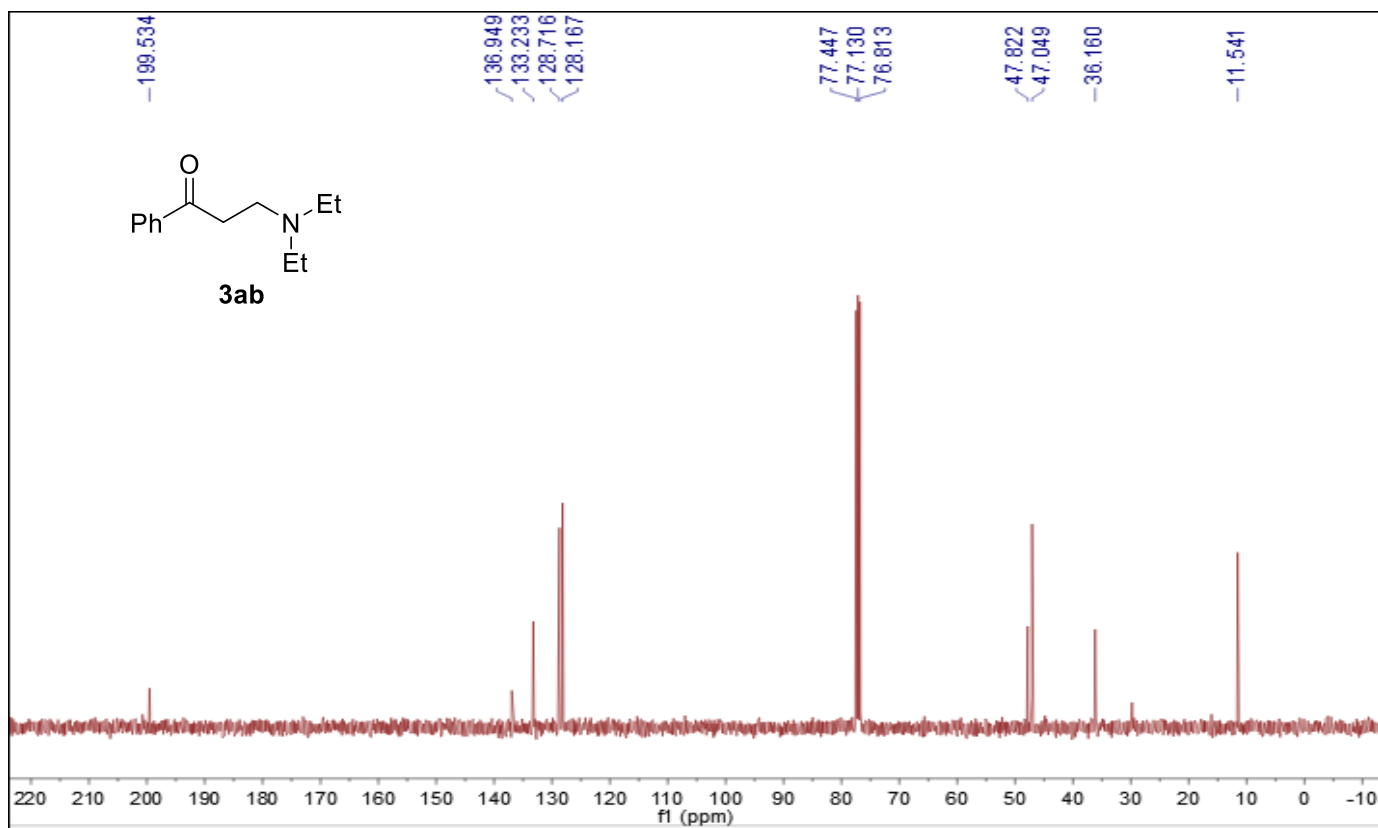

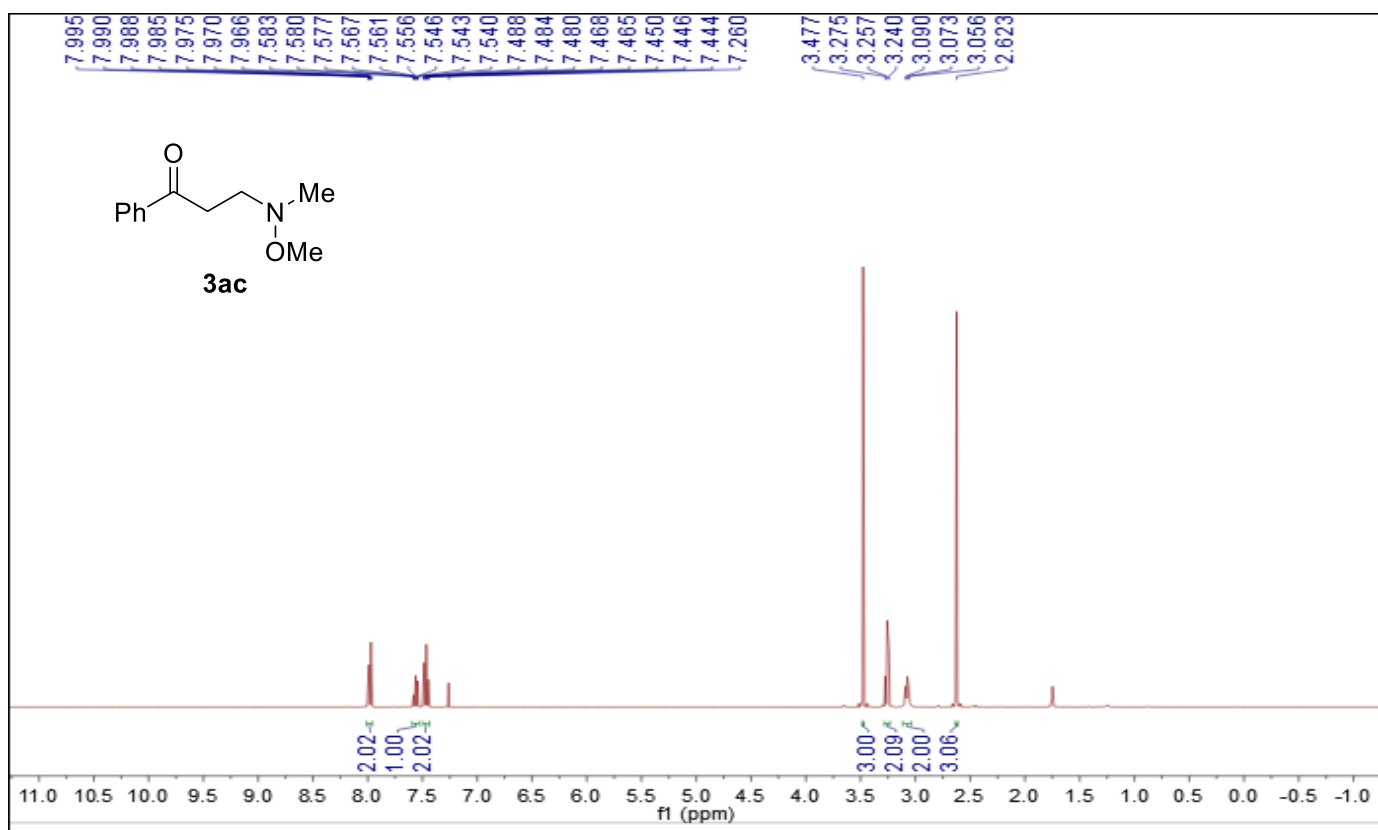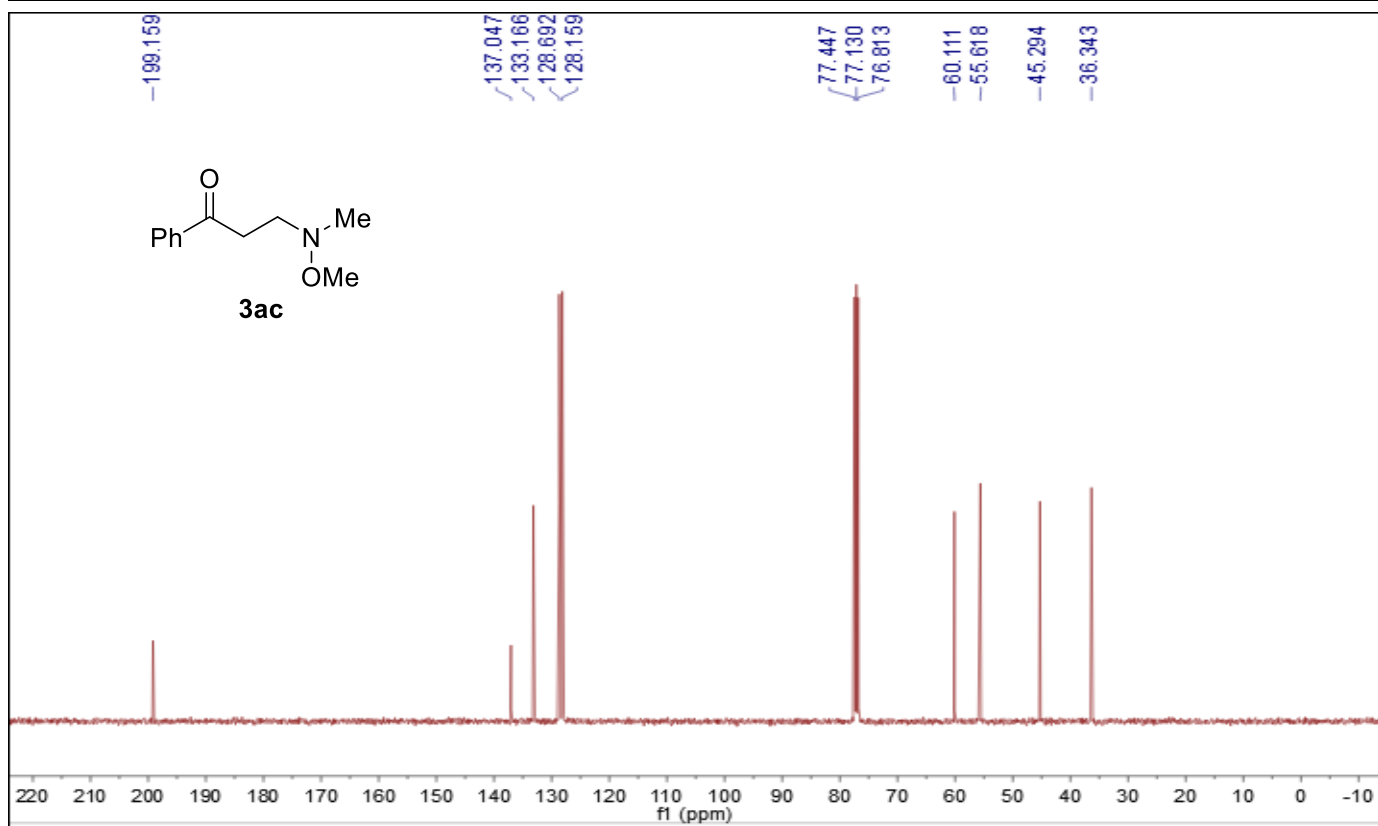

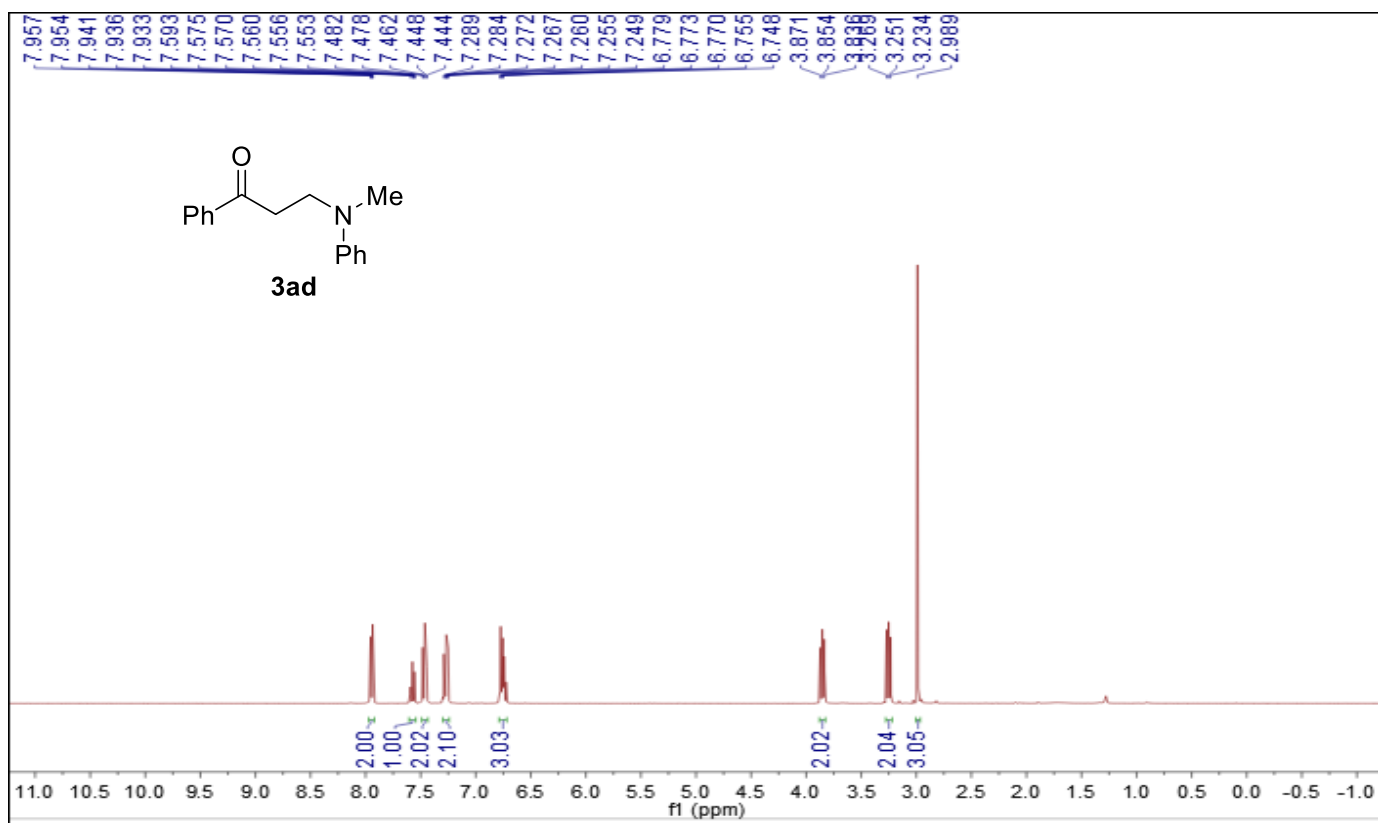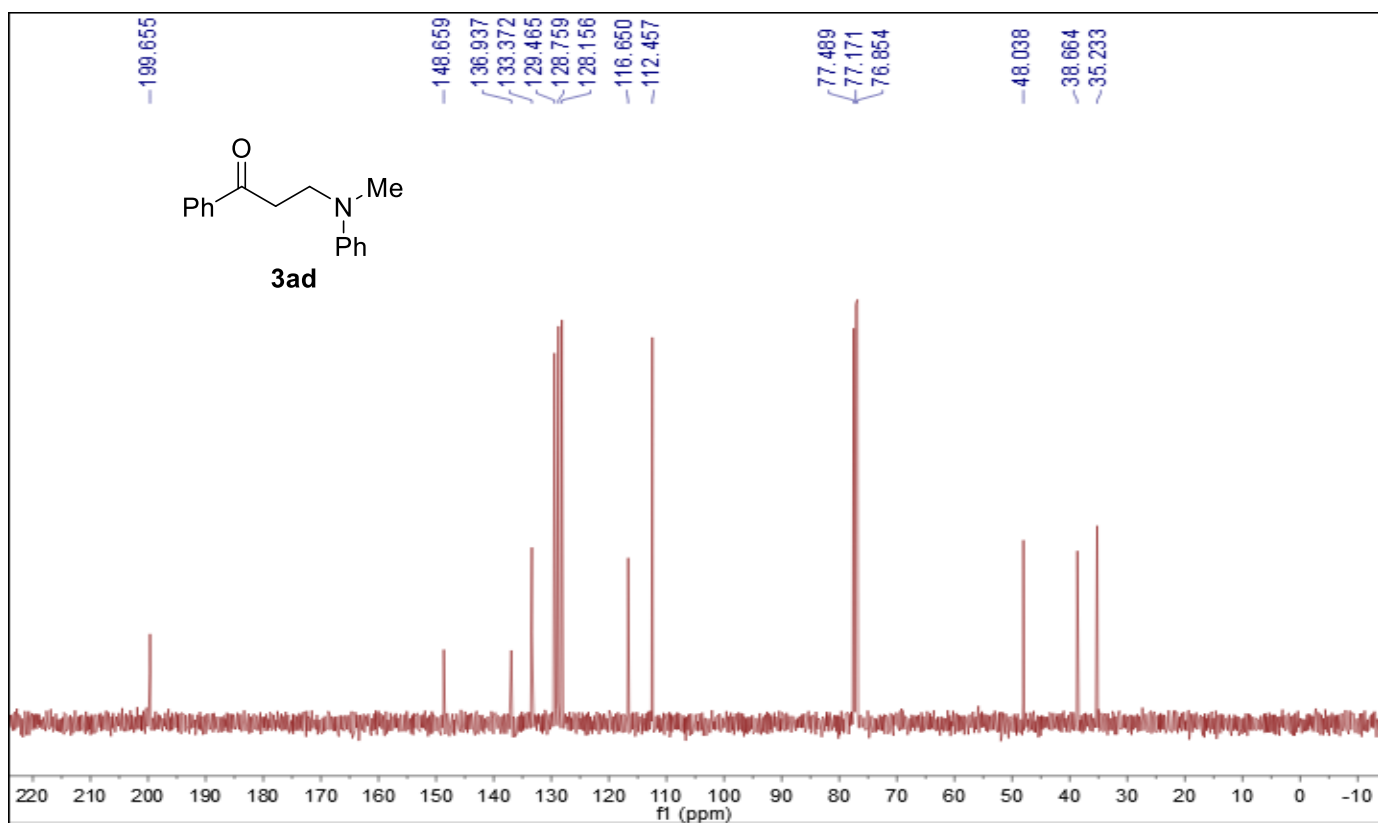



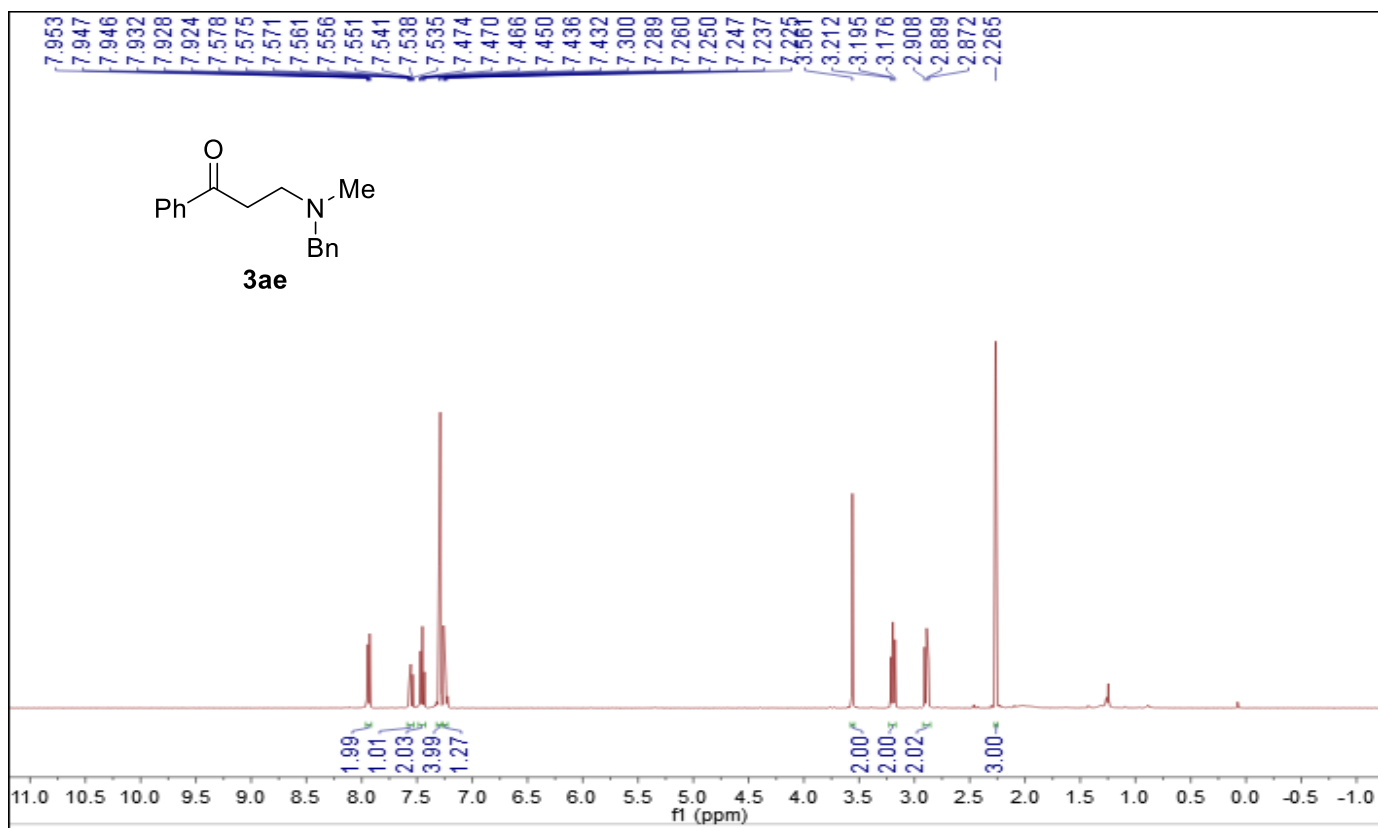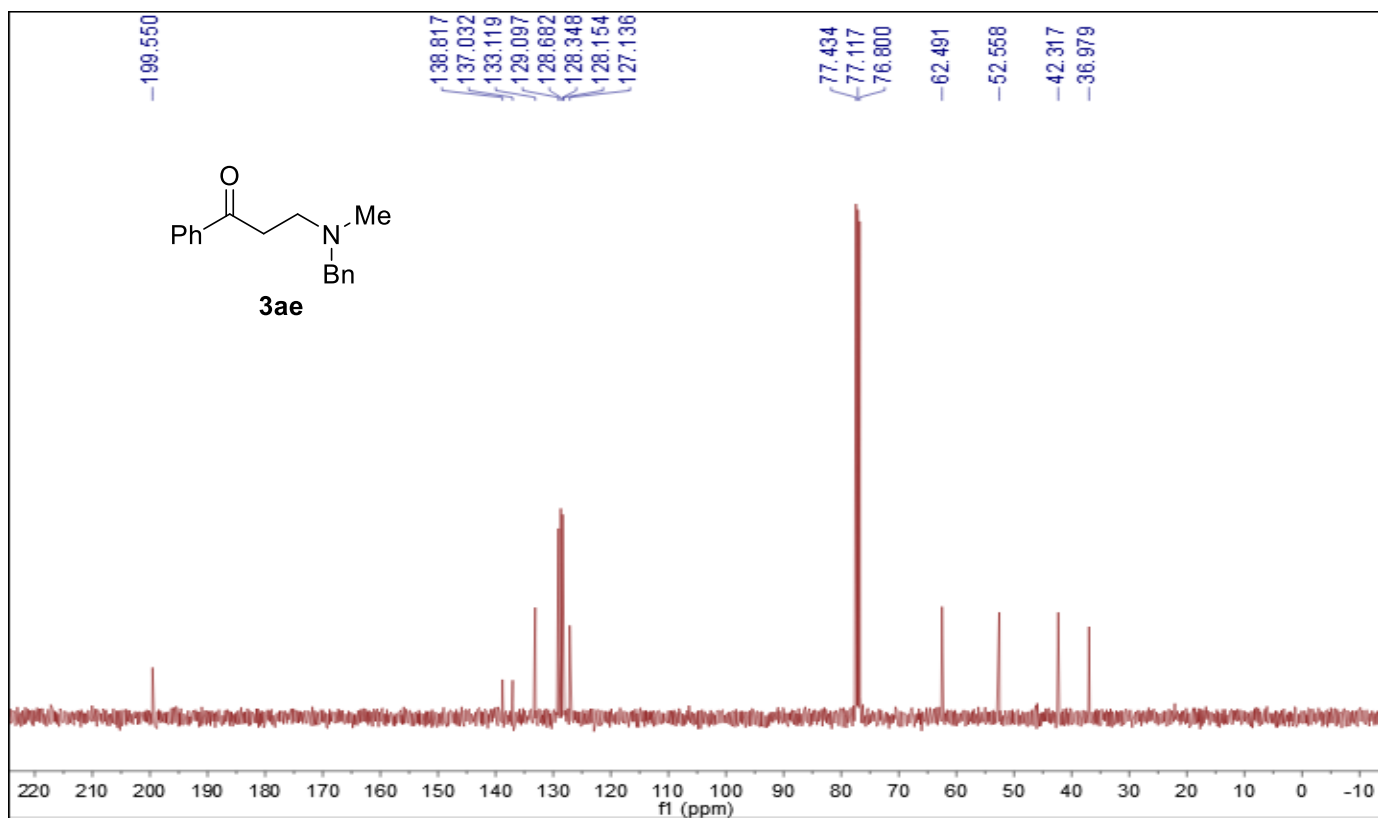

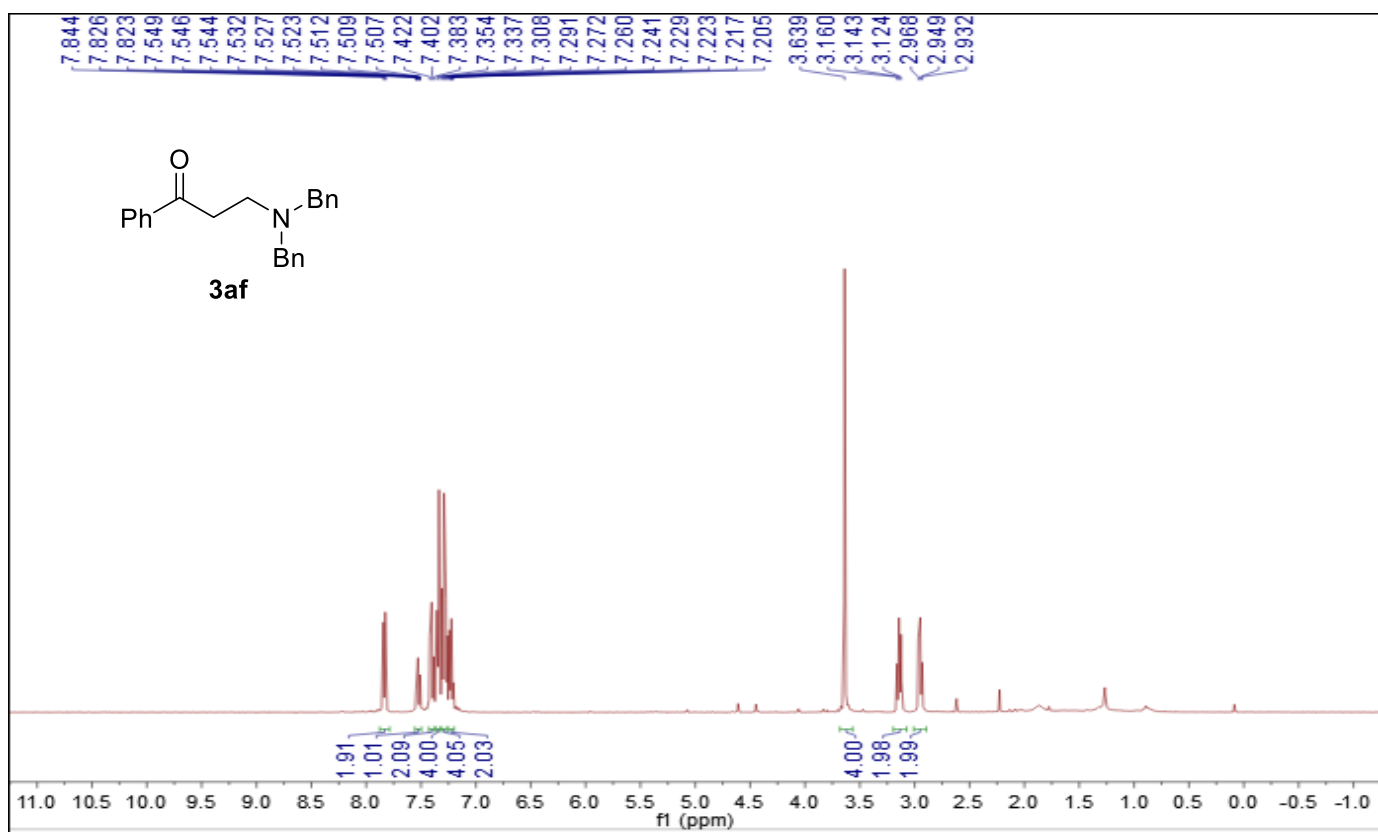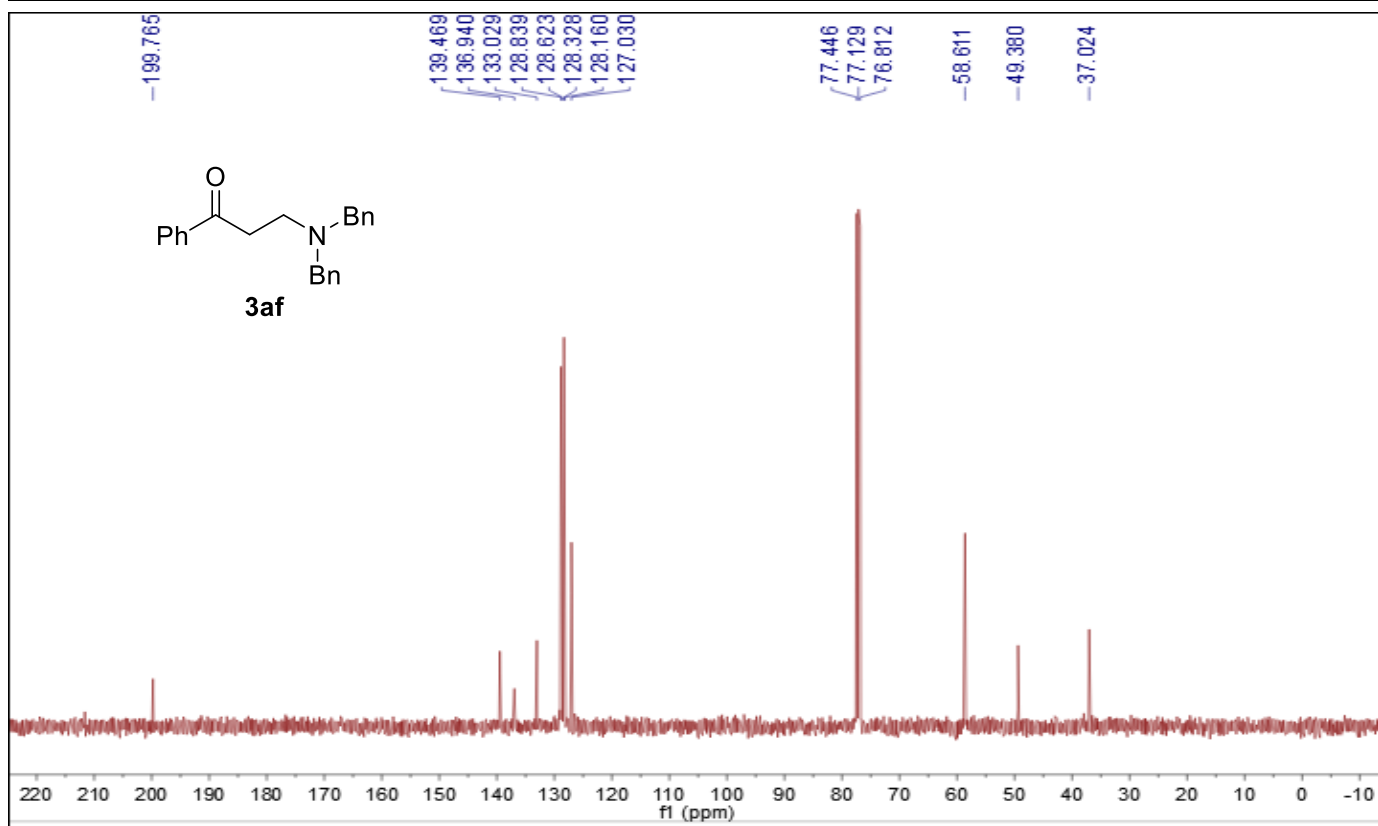

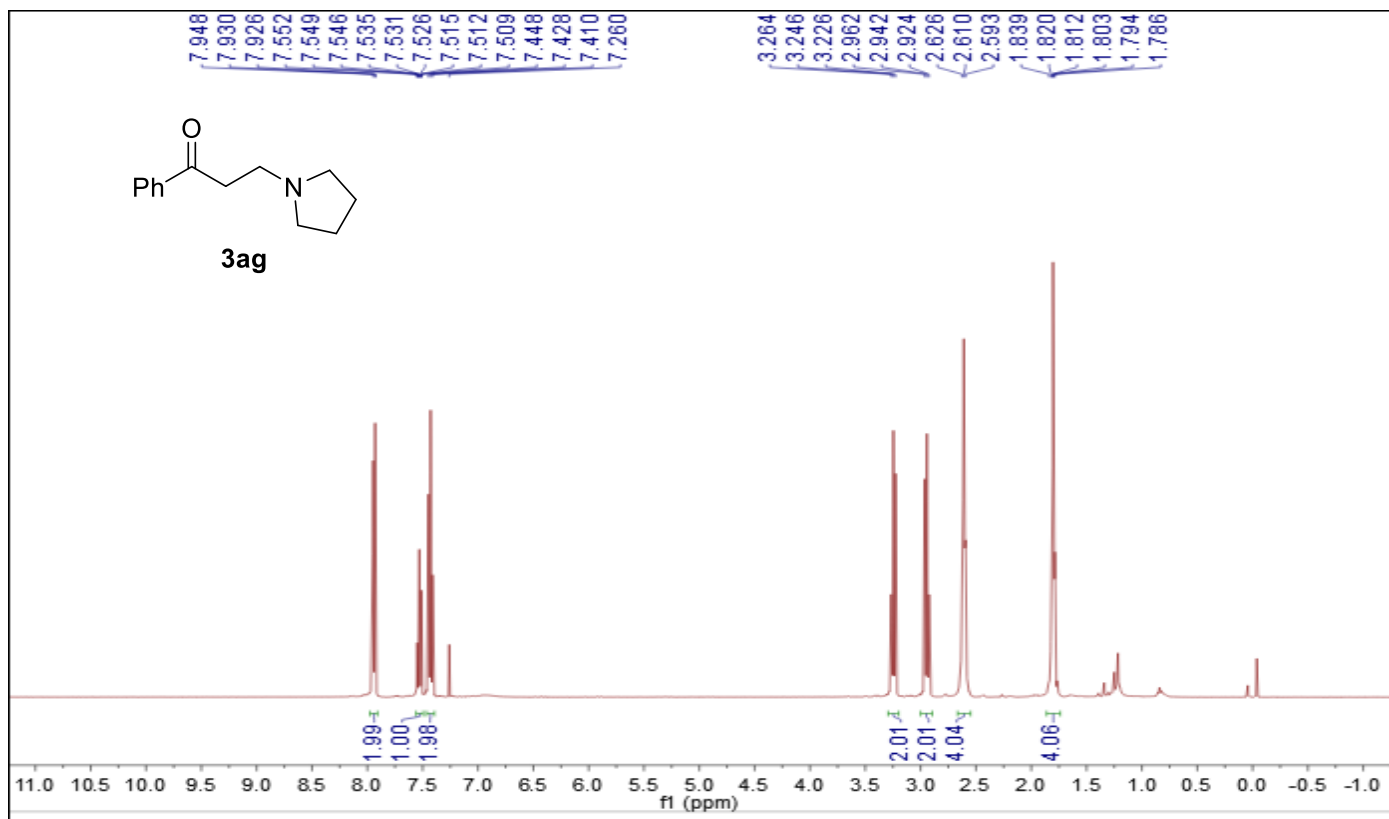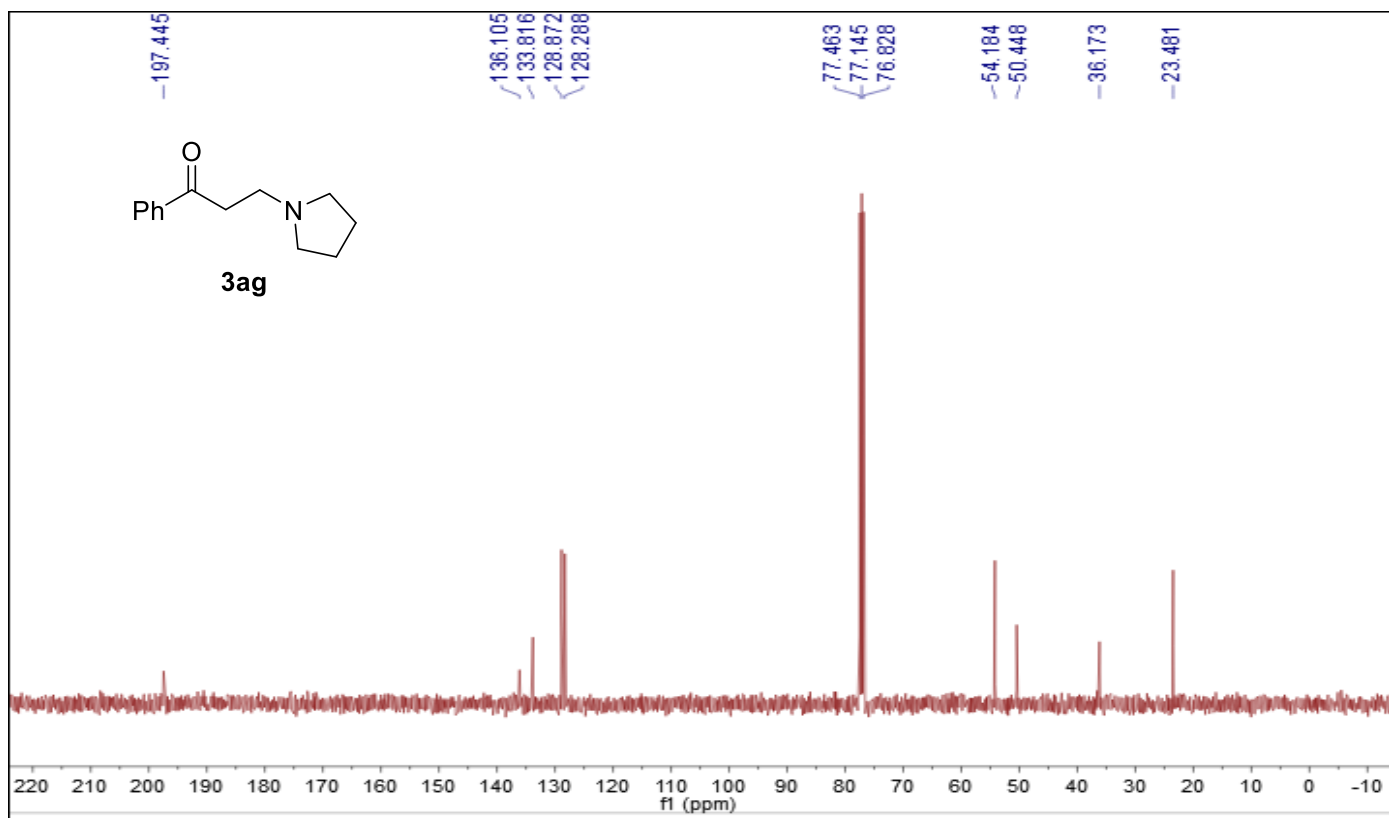

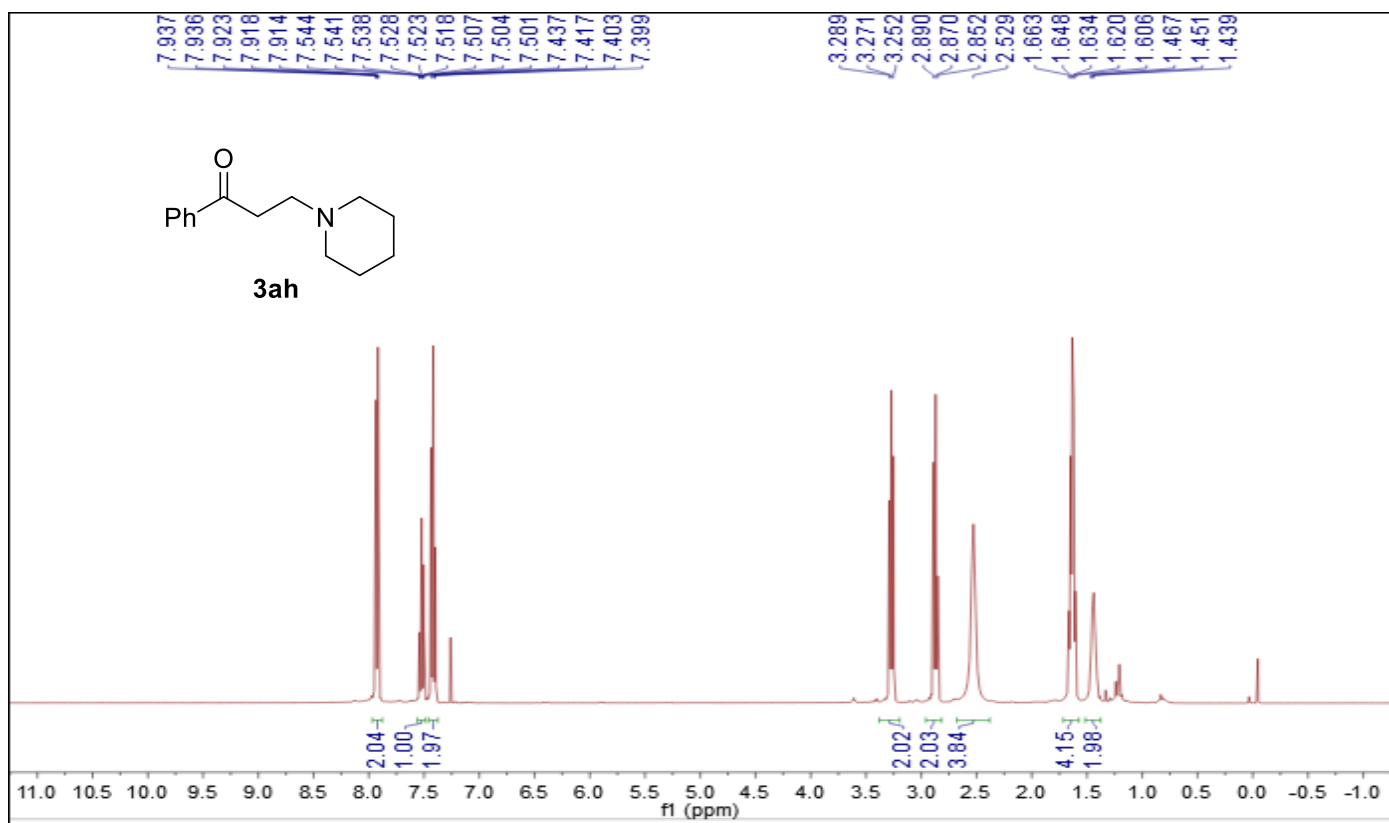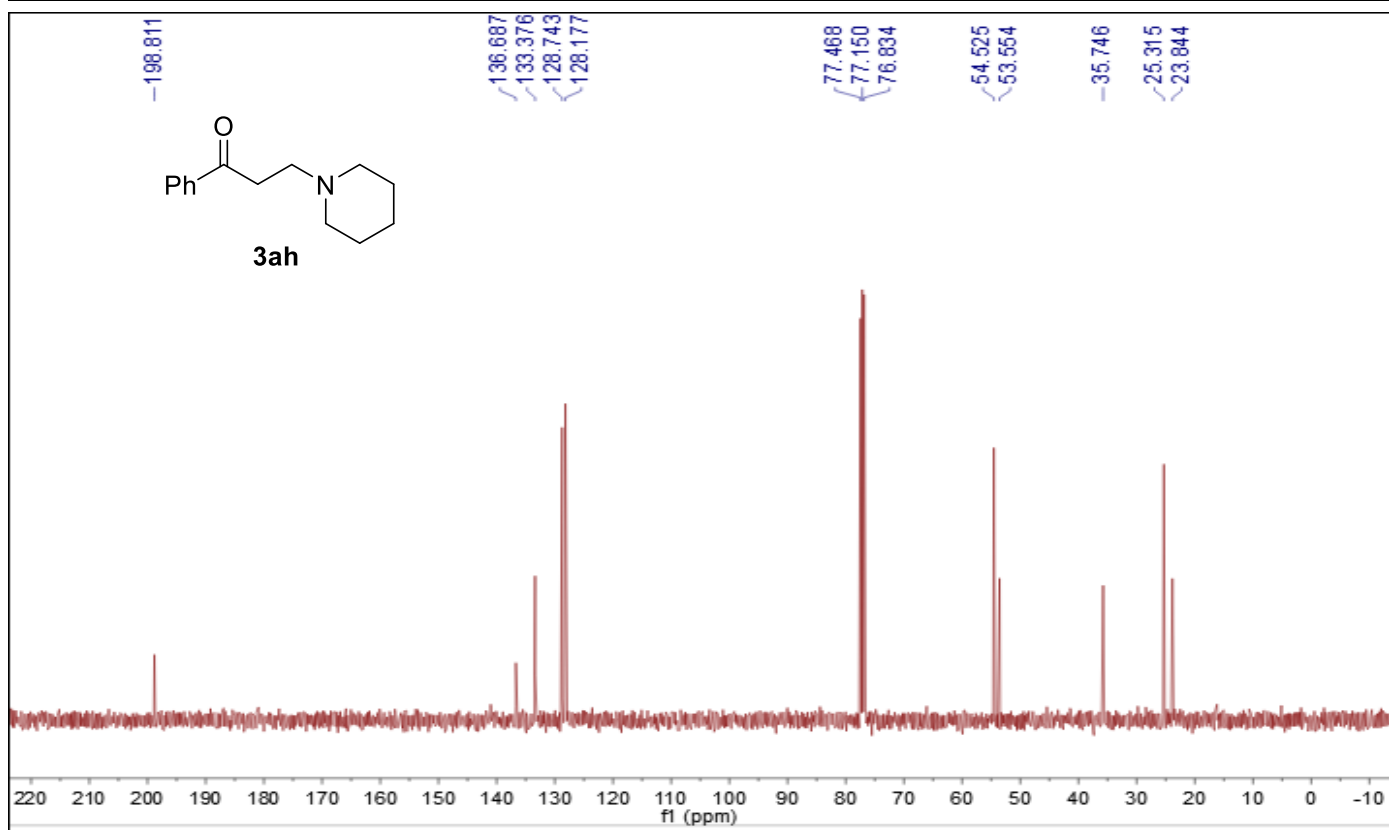

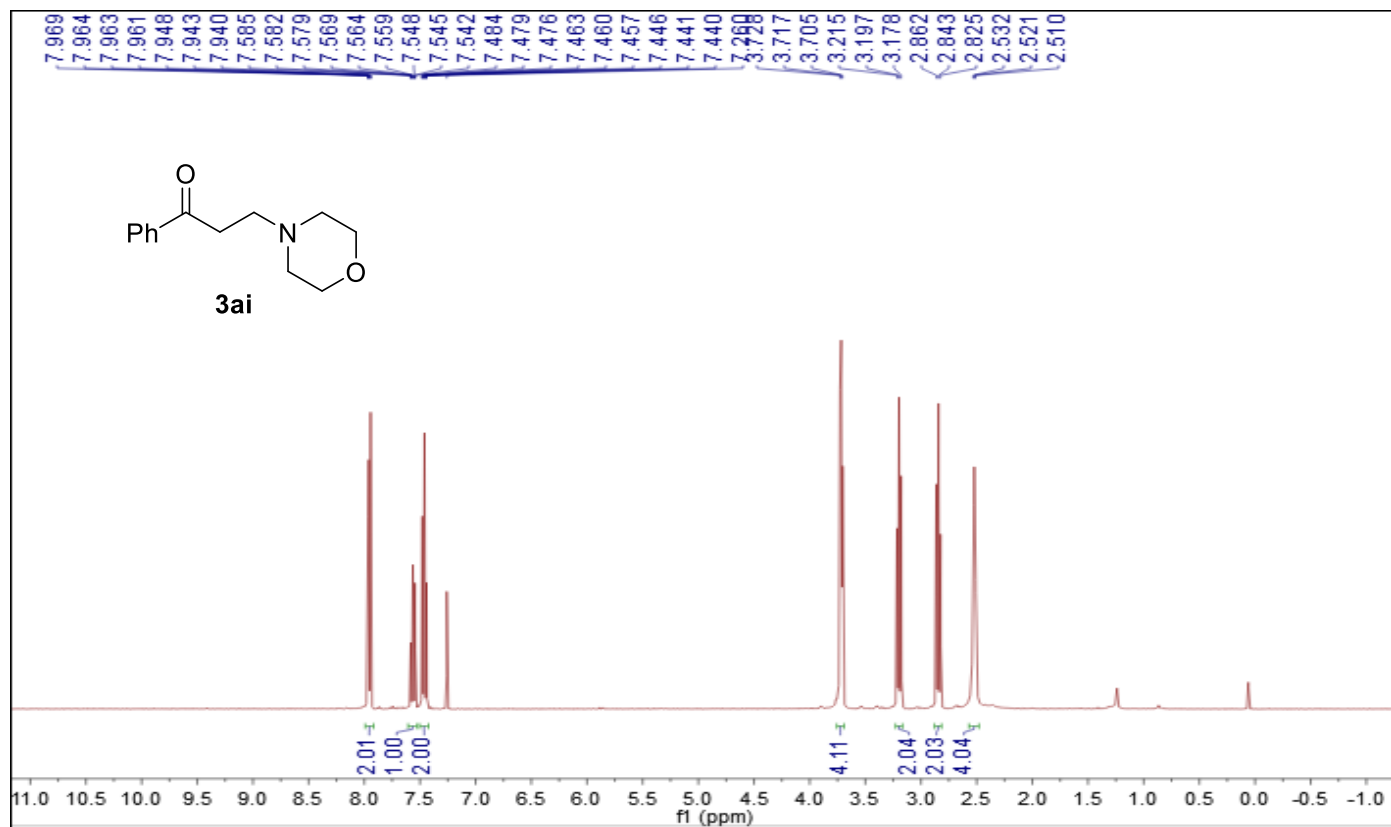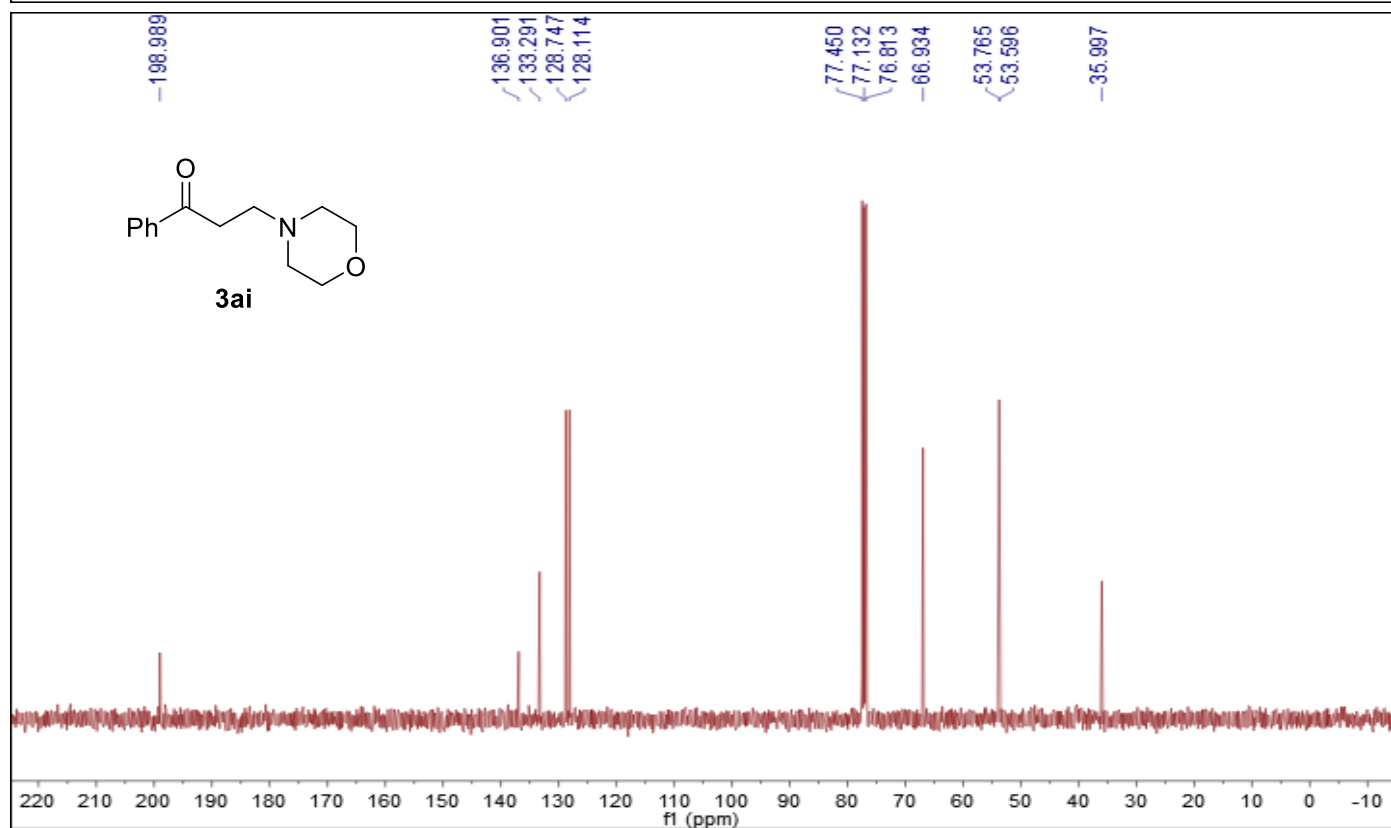

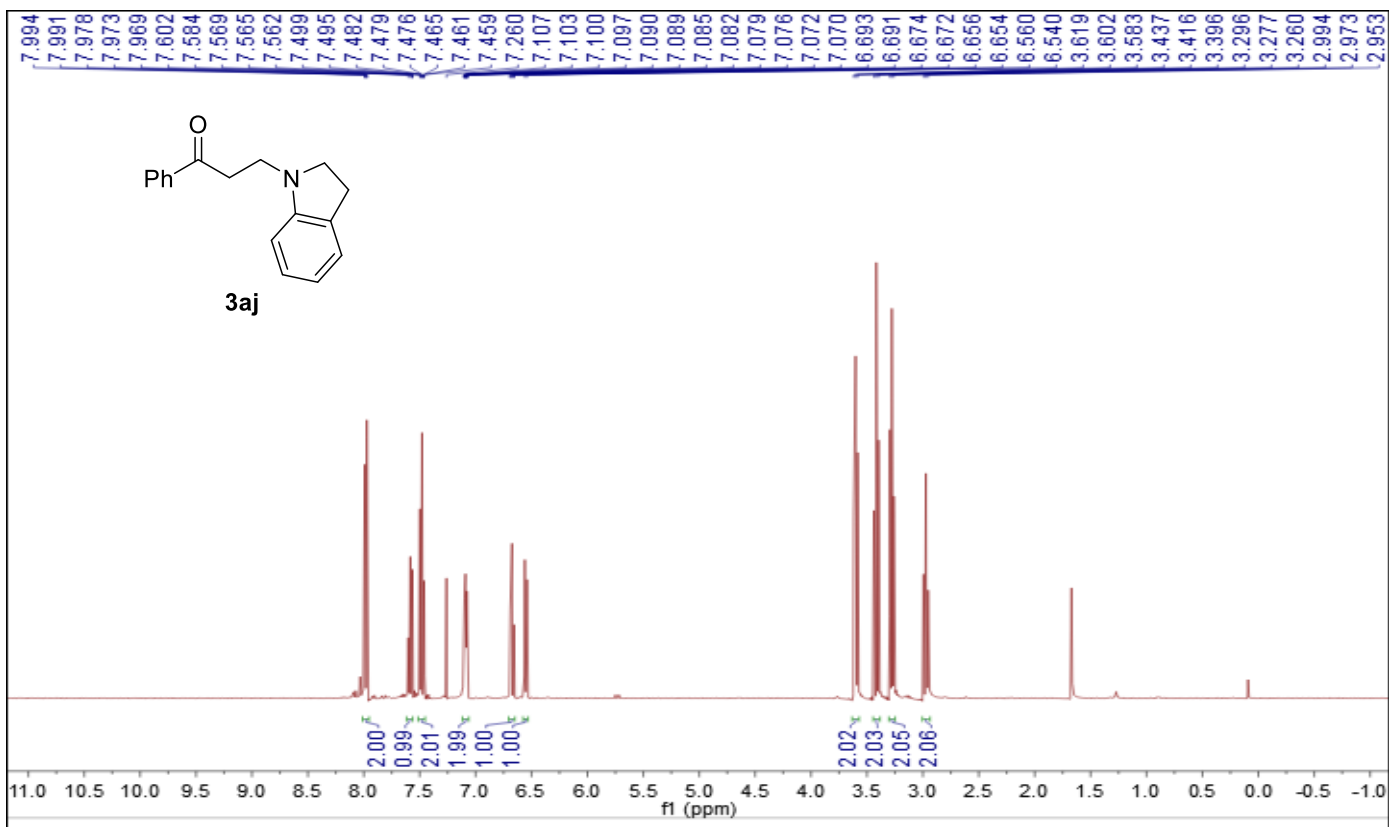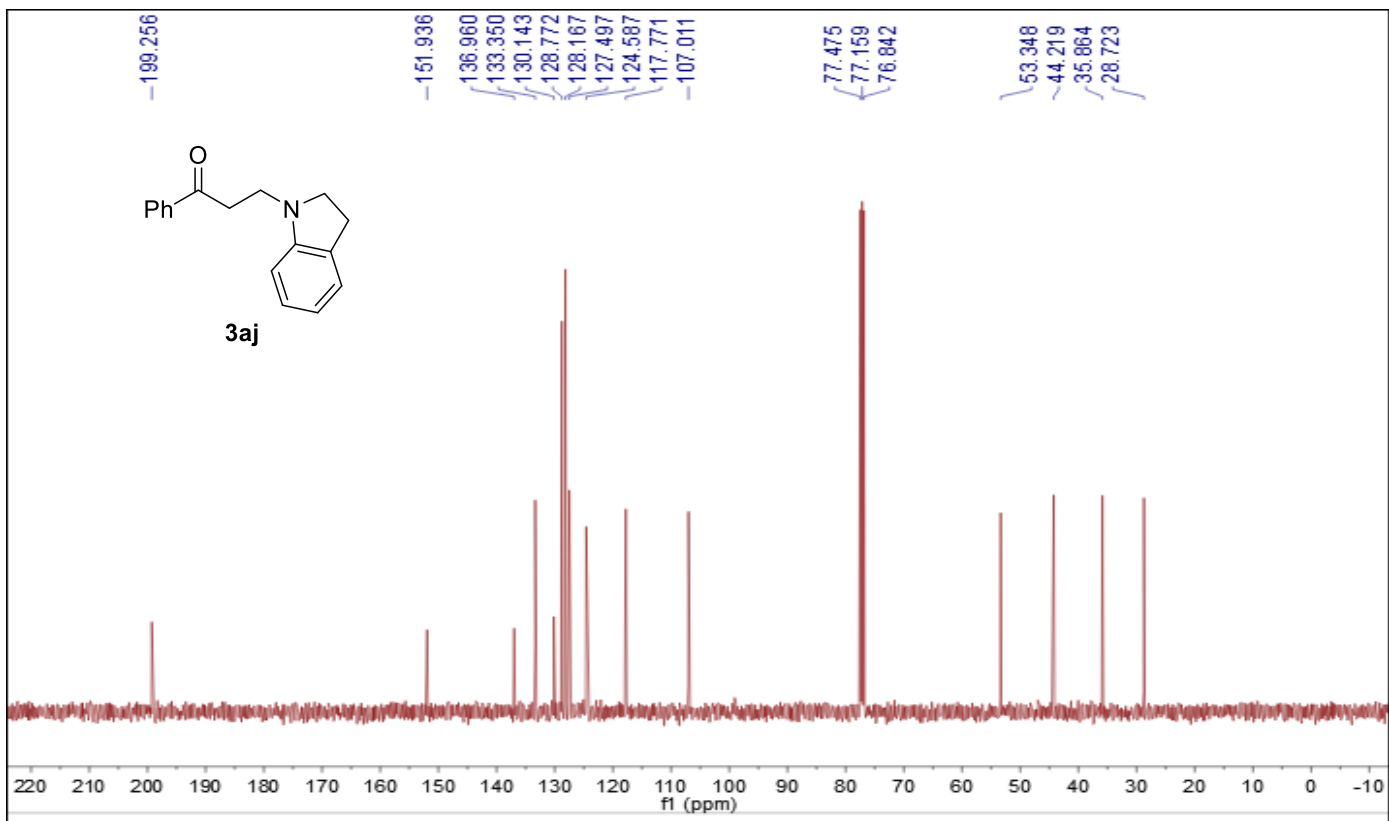

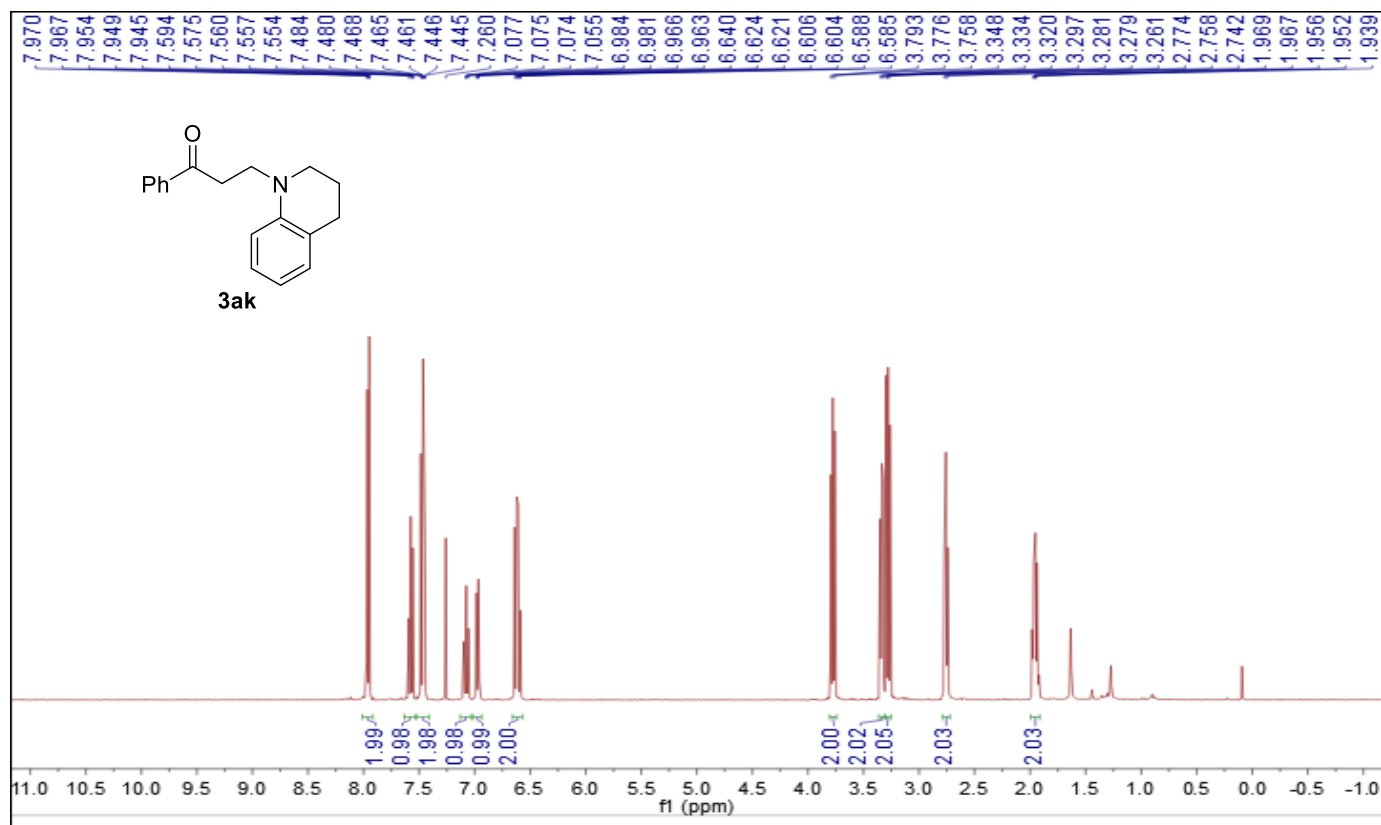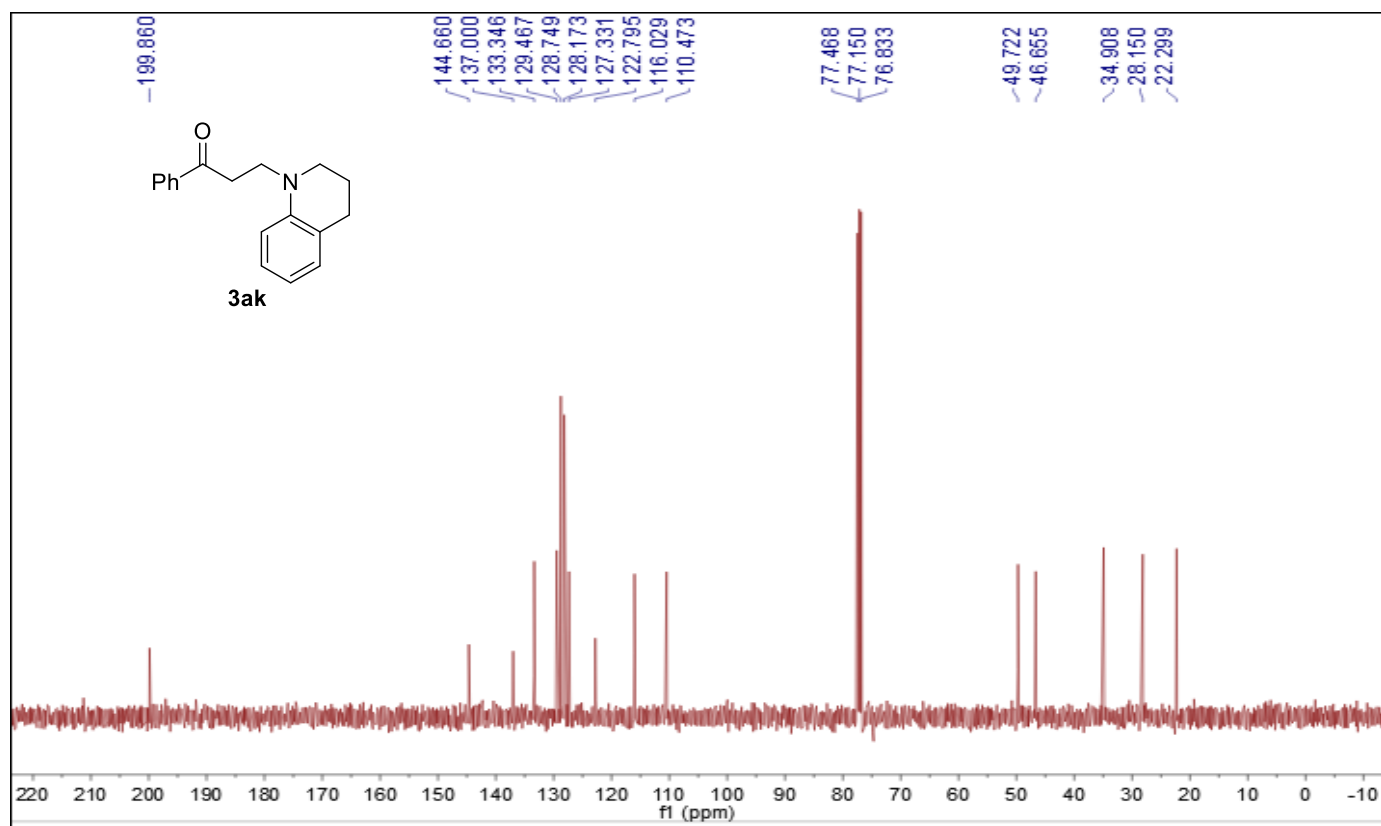

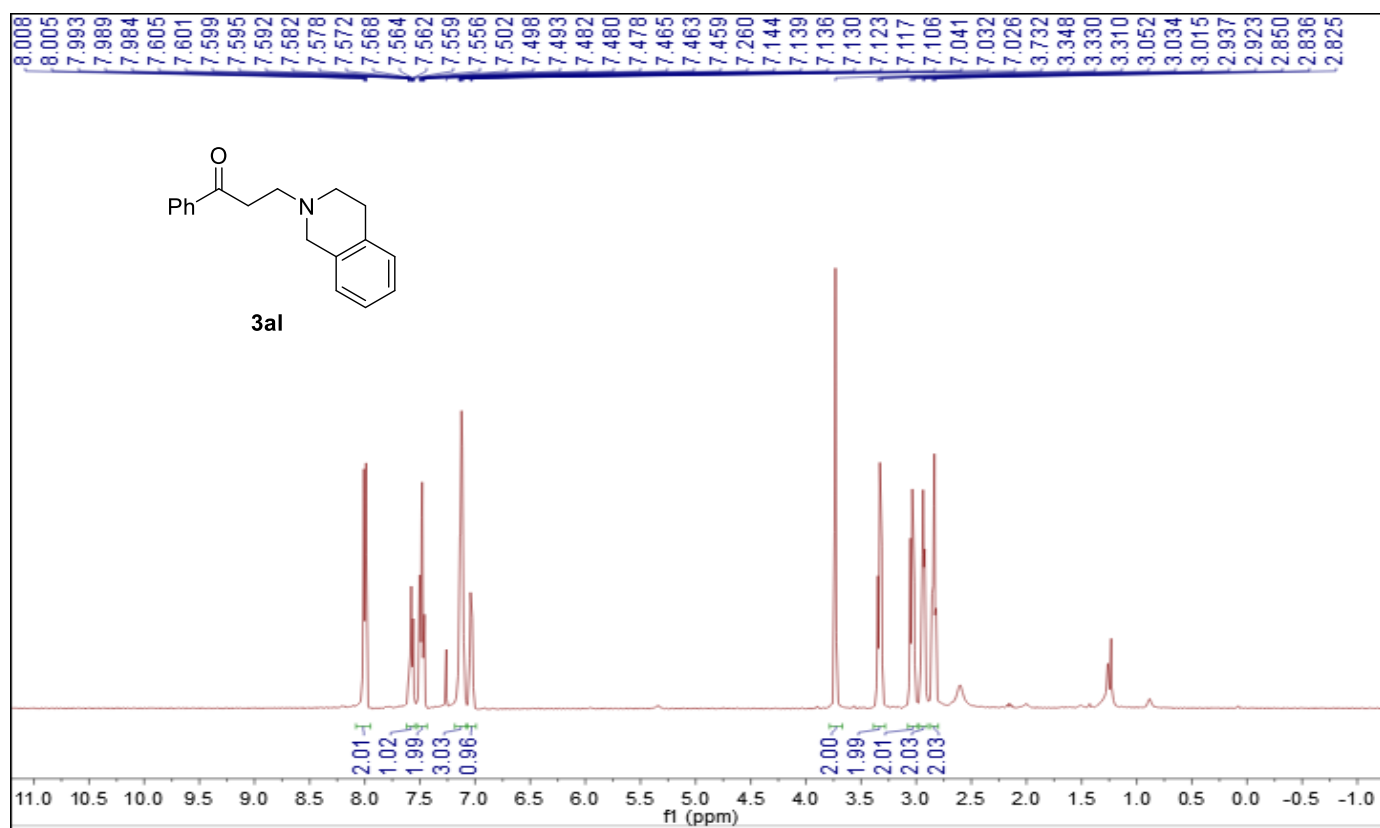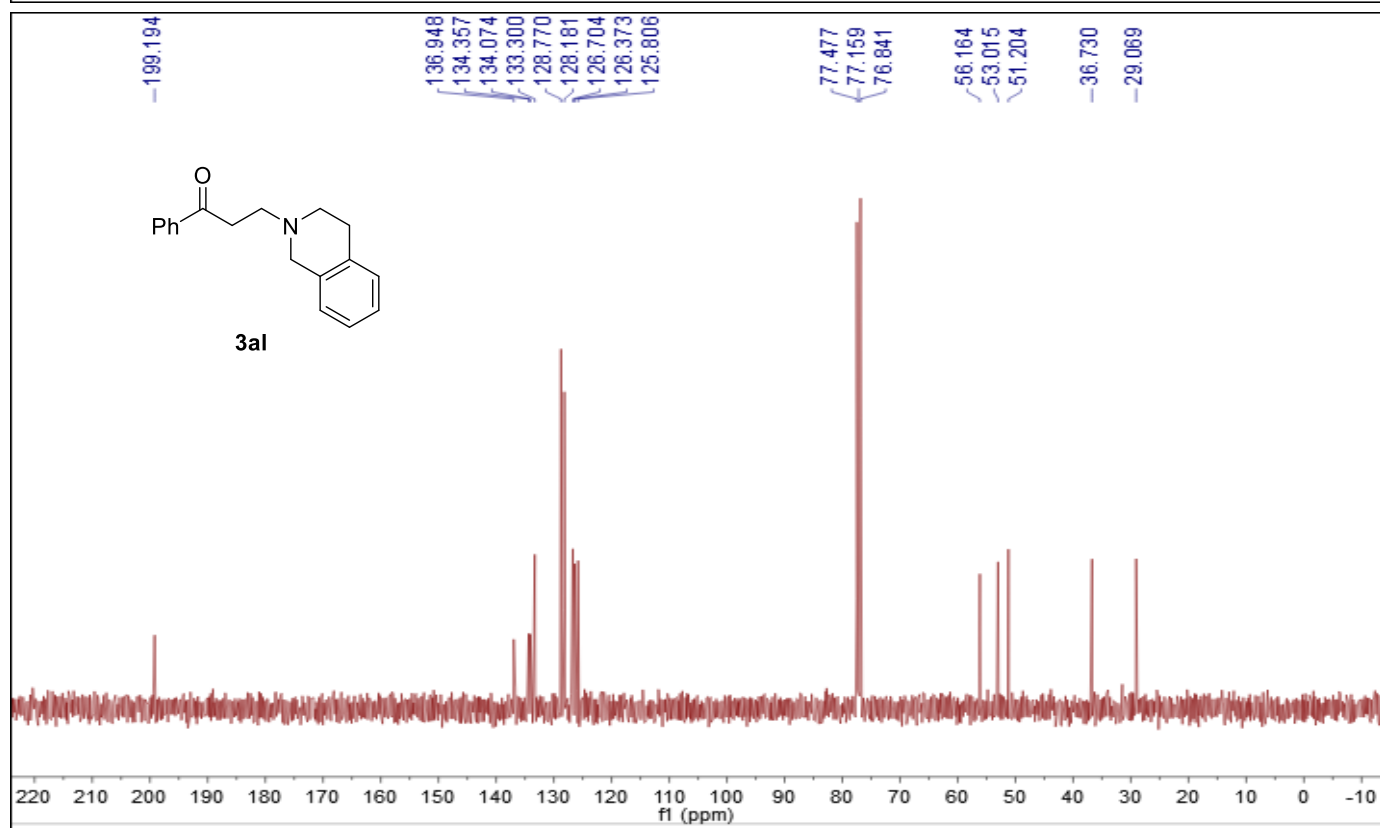



# $^1\text{H}$ and $^{13}\text{C}$ NMR spectra of mechanism studies

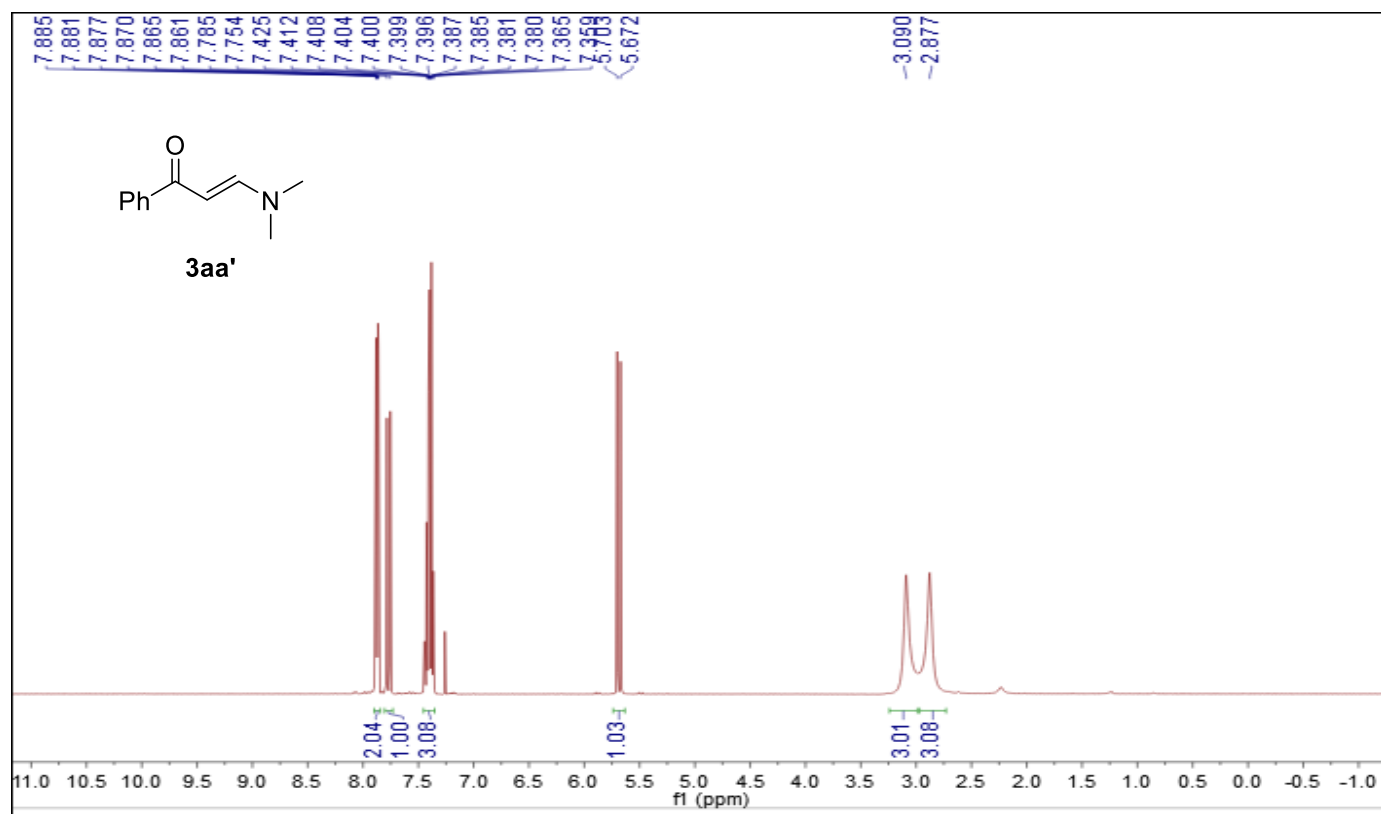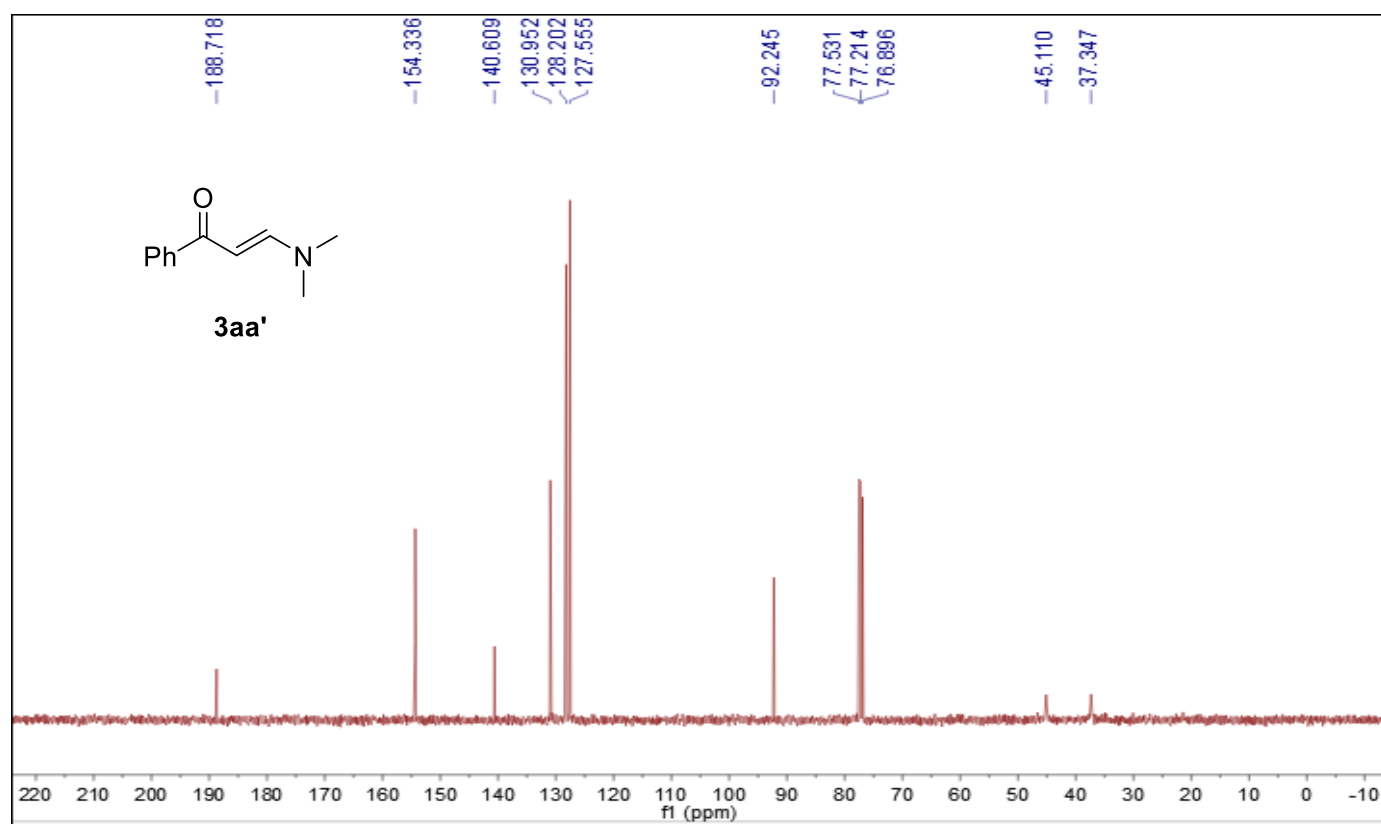

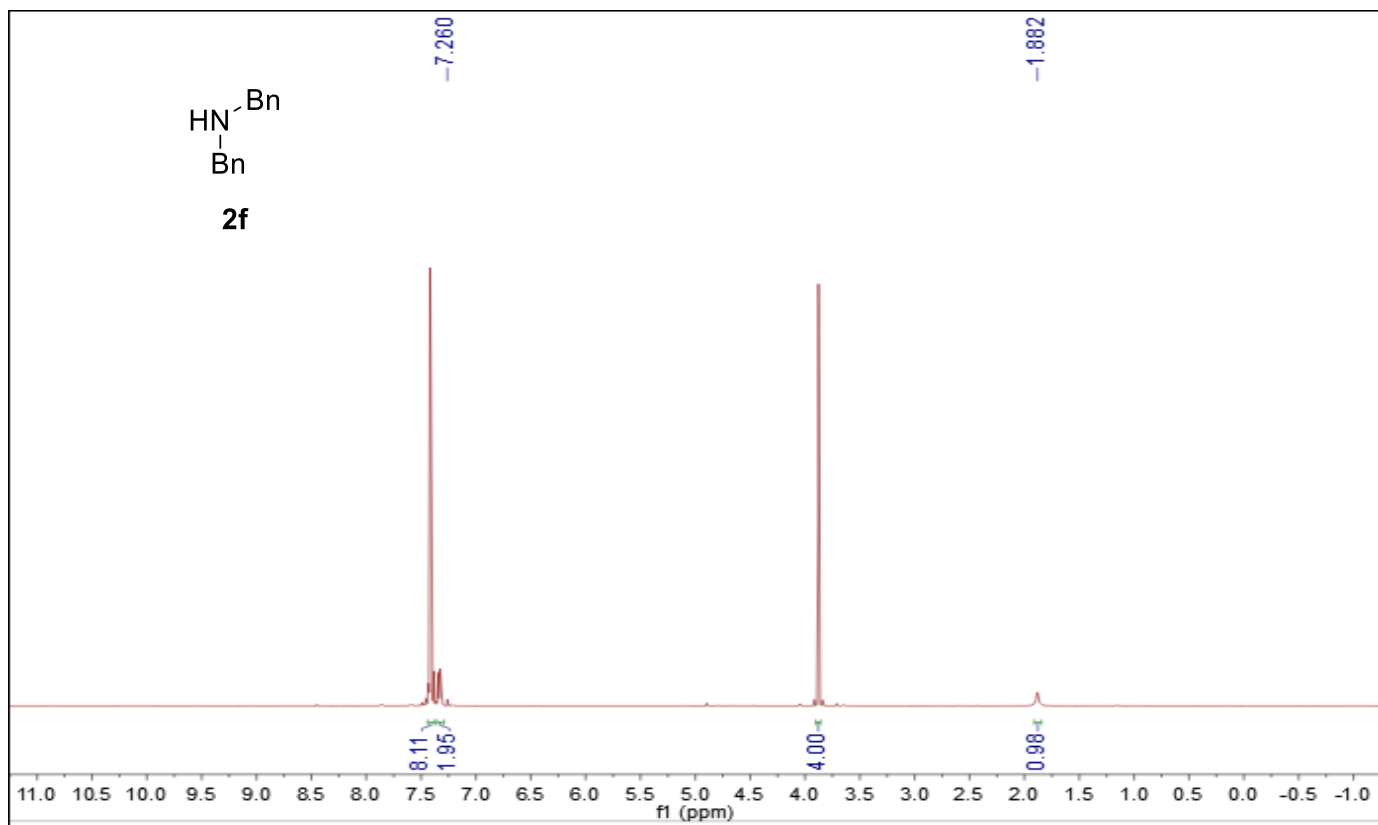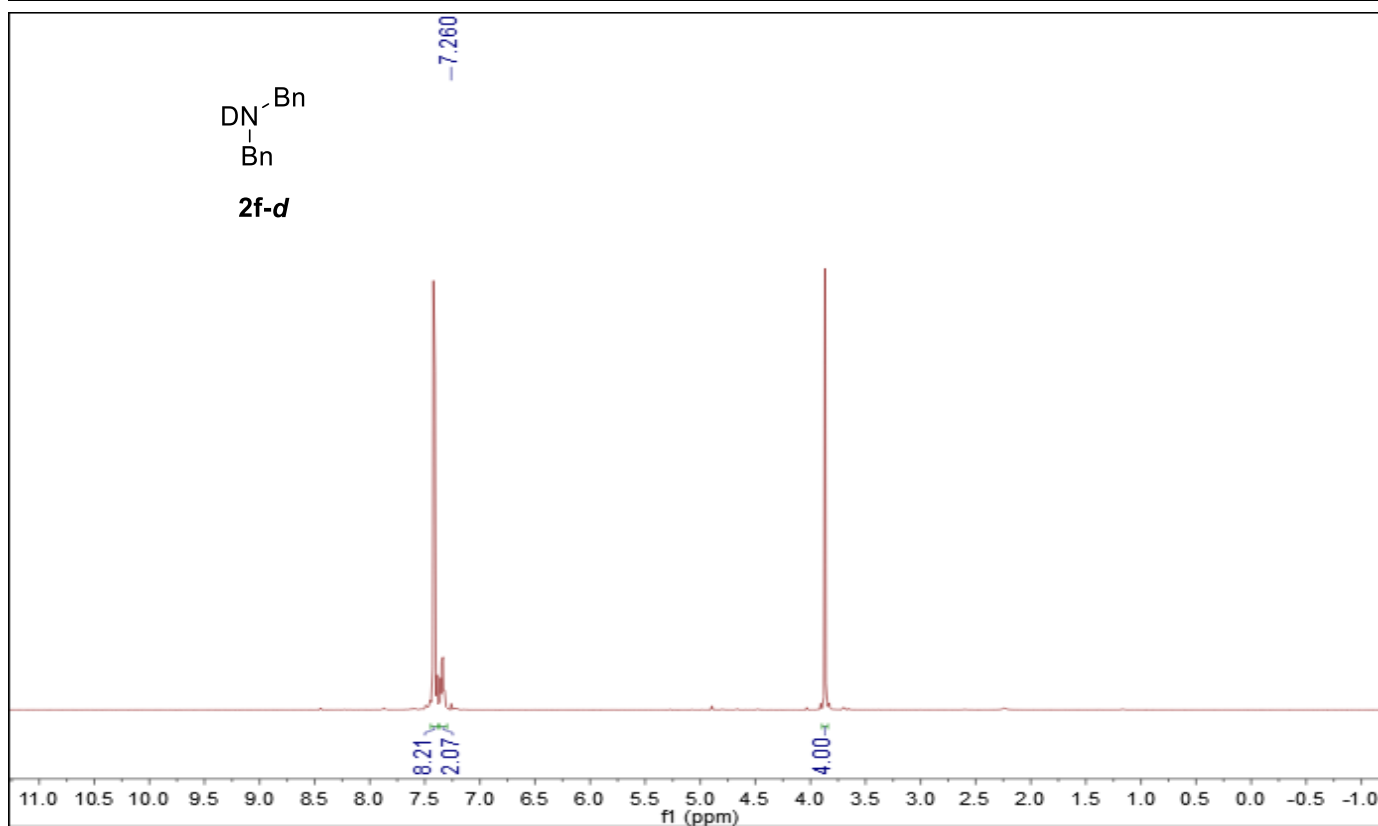

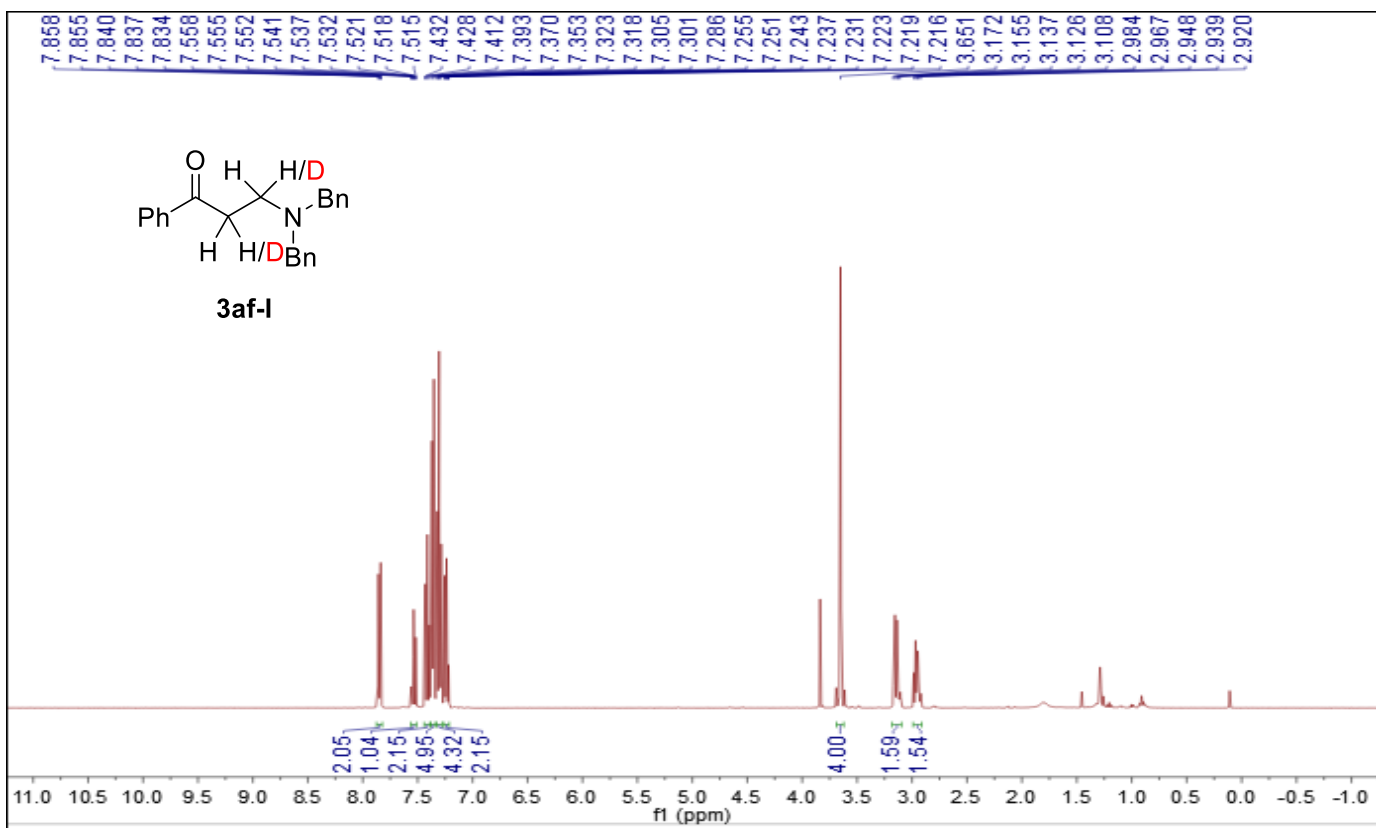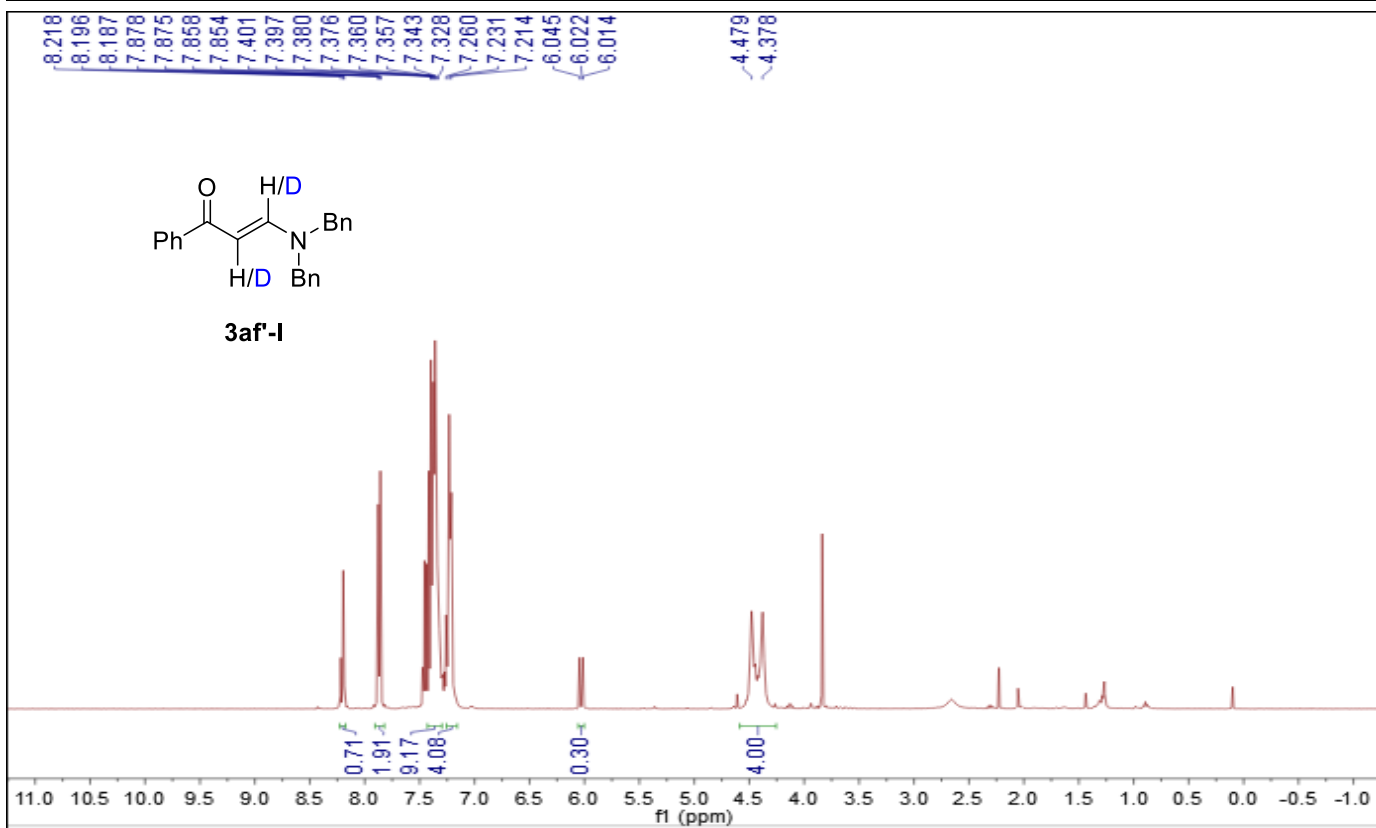

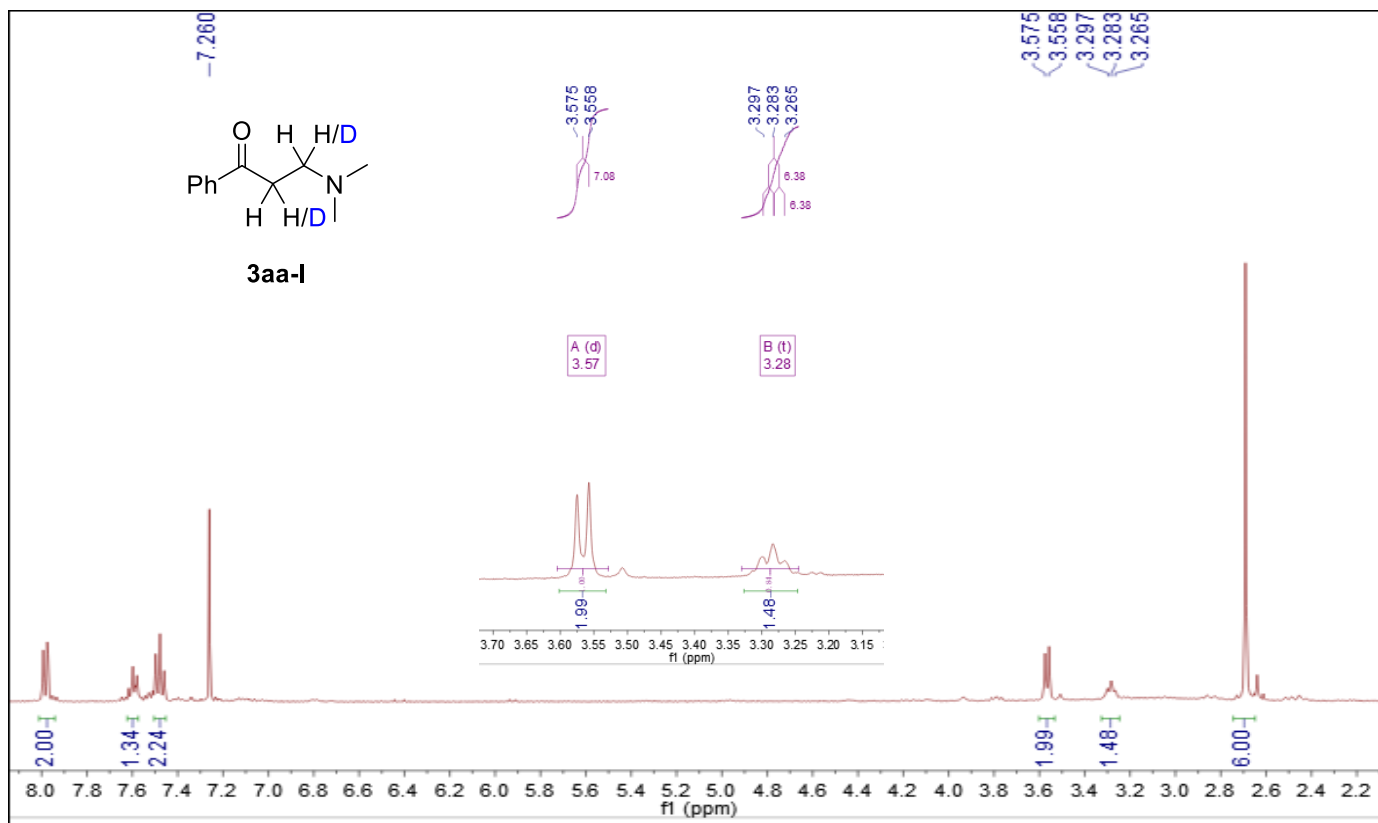

# $^1\text{H}$ and $^{13}\text{C}$ NMR Spectra for applications

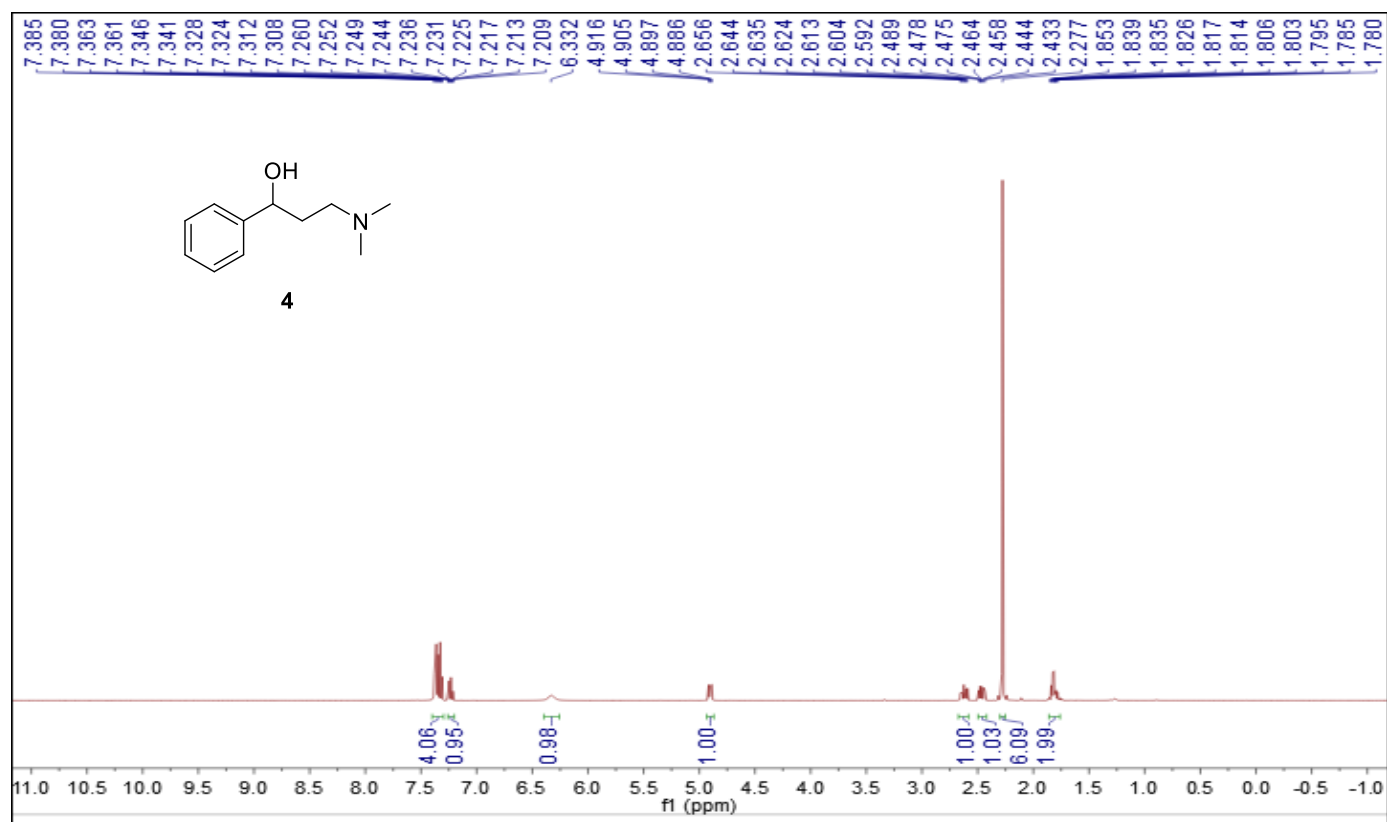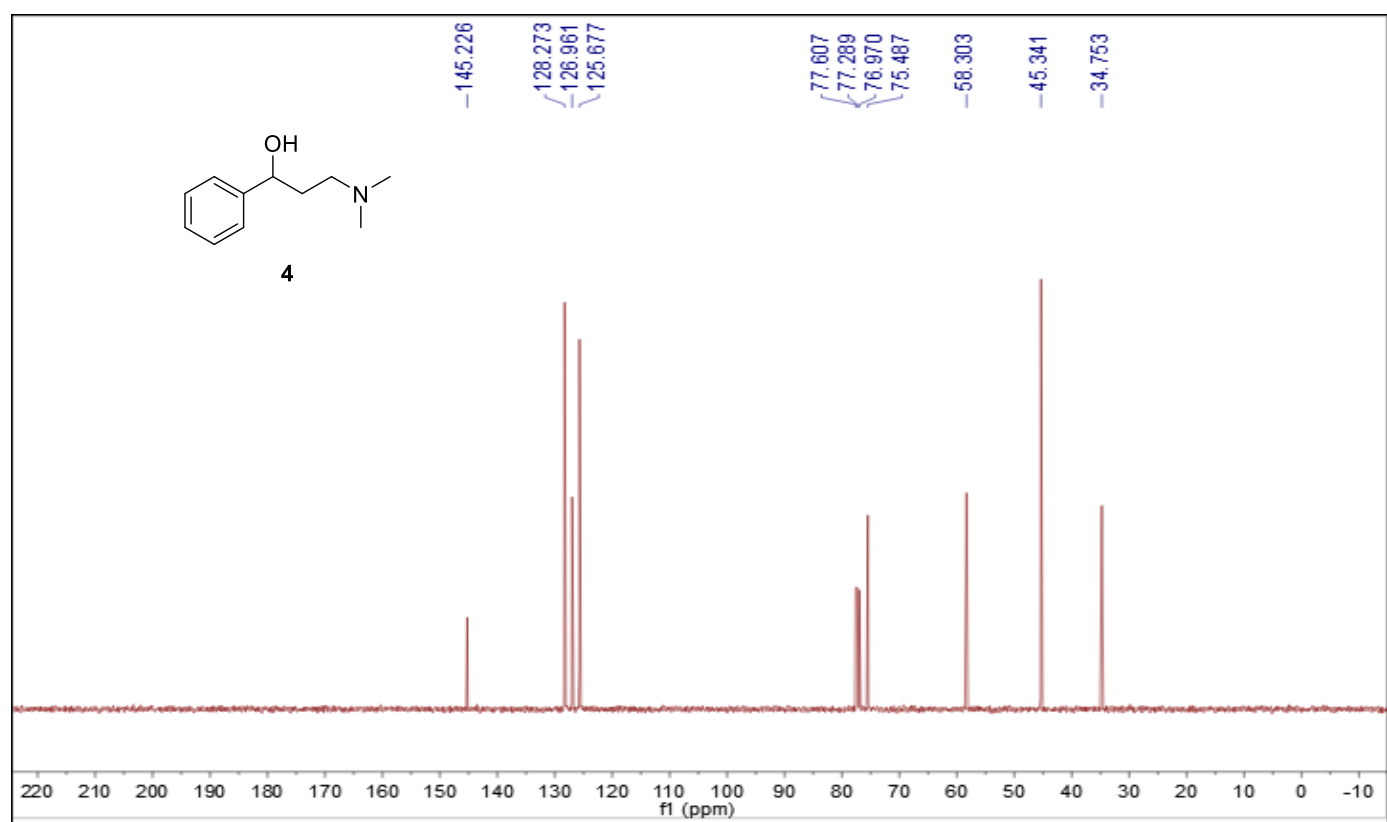

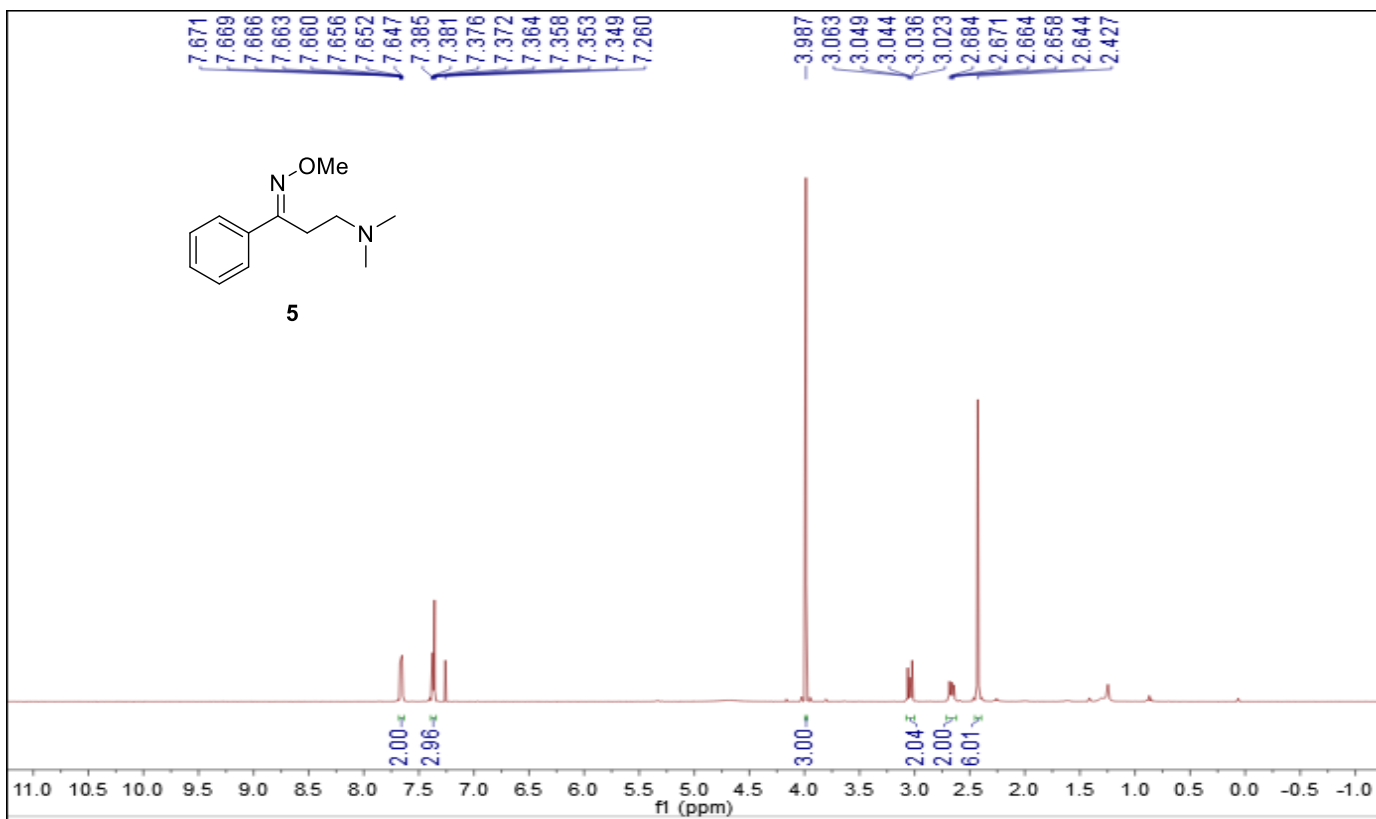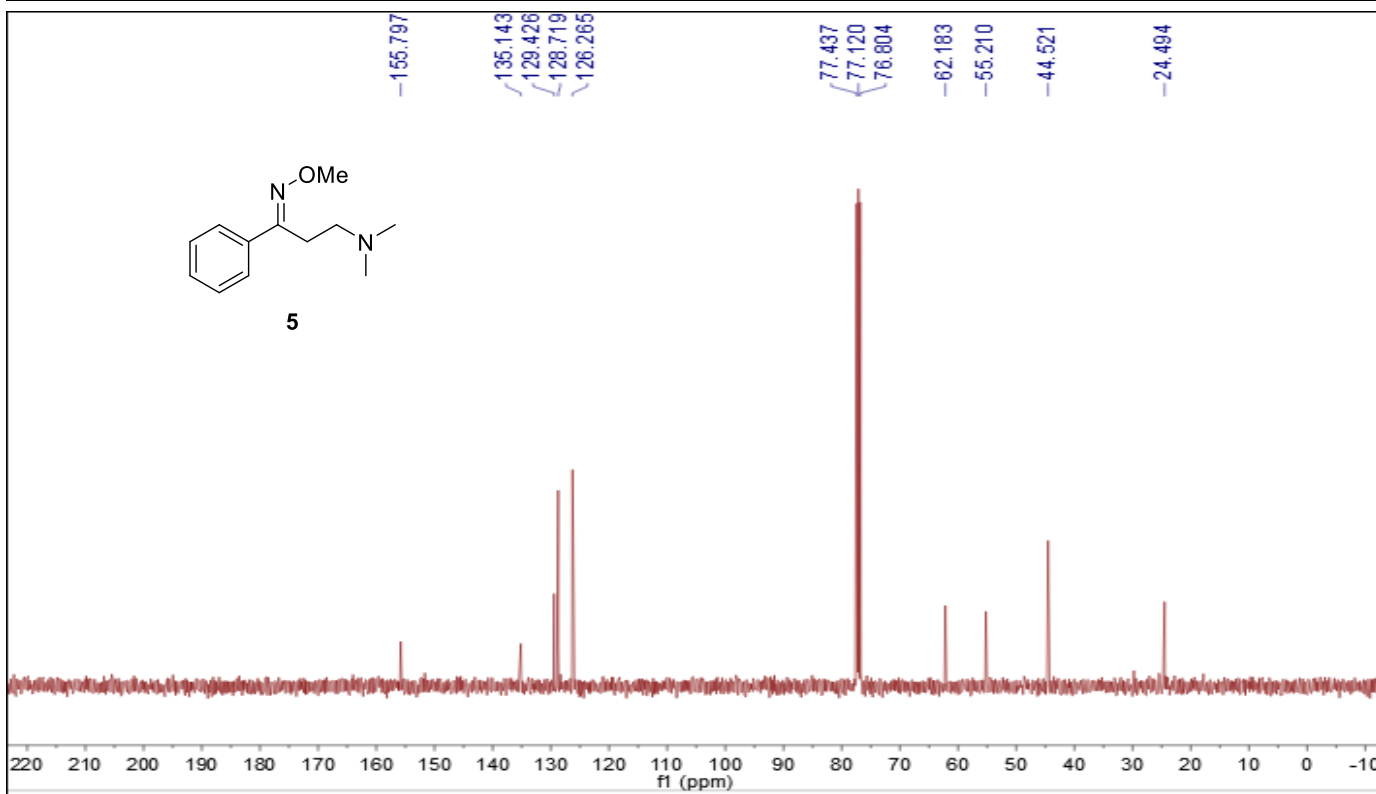

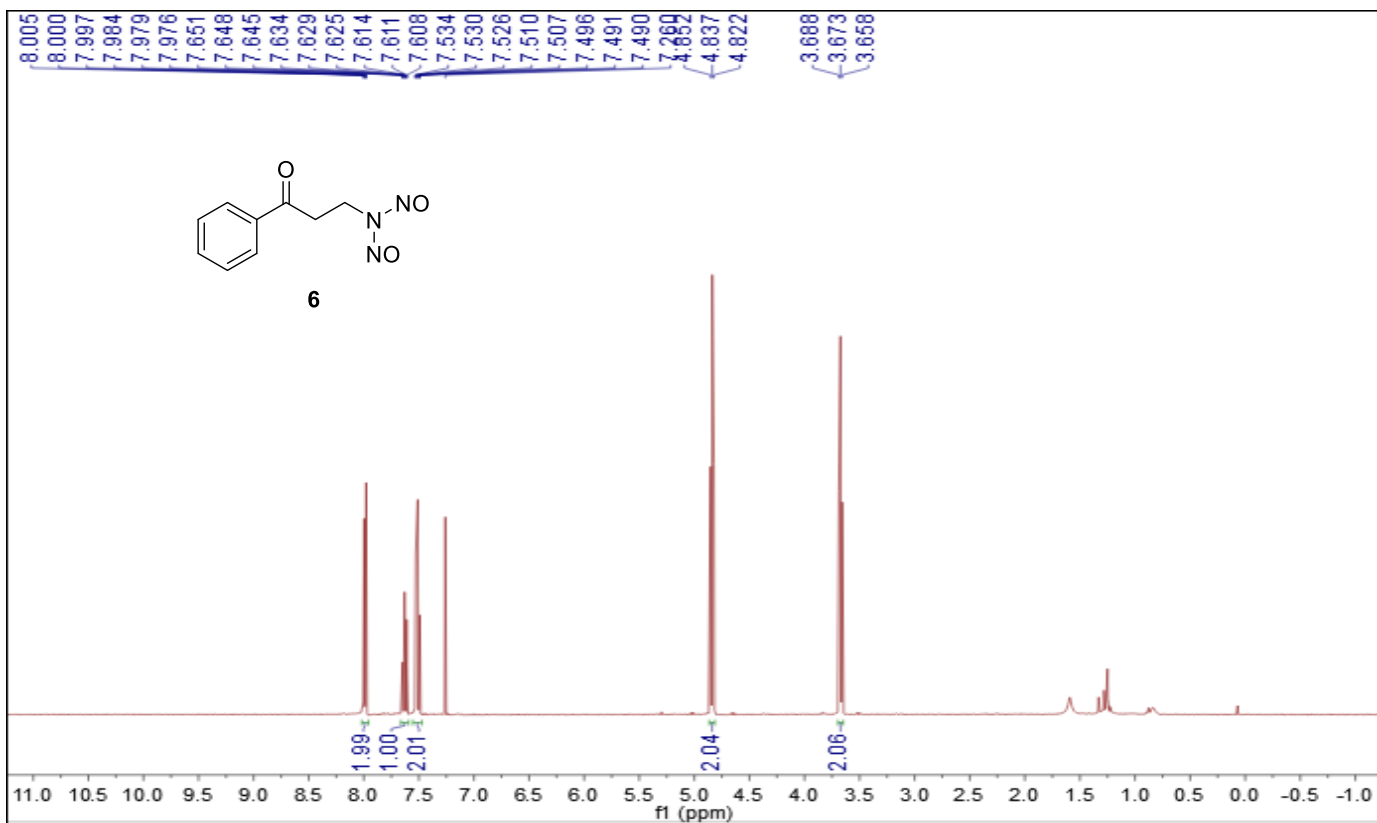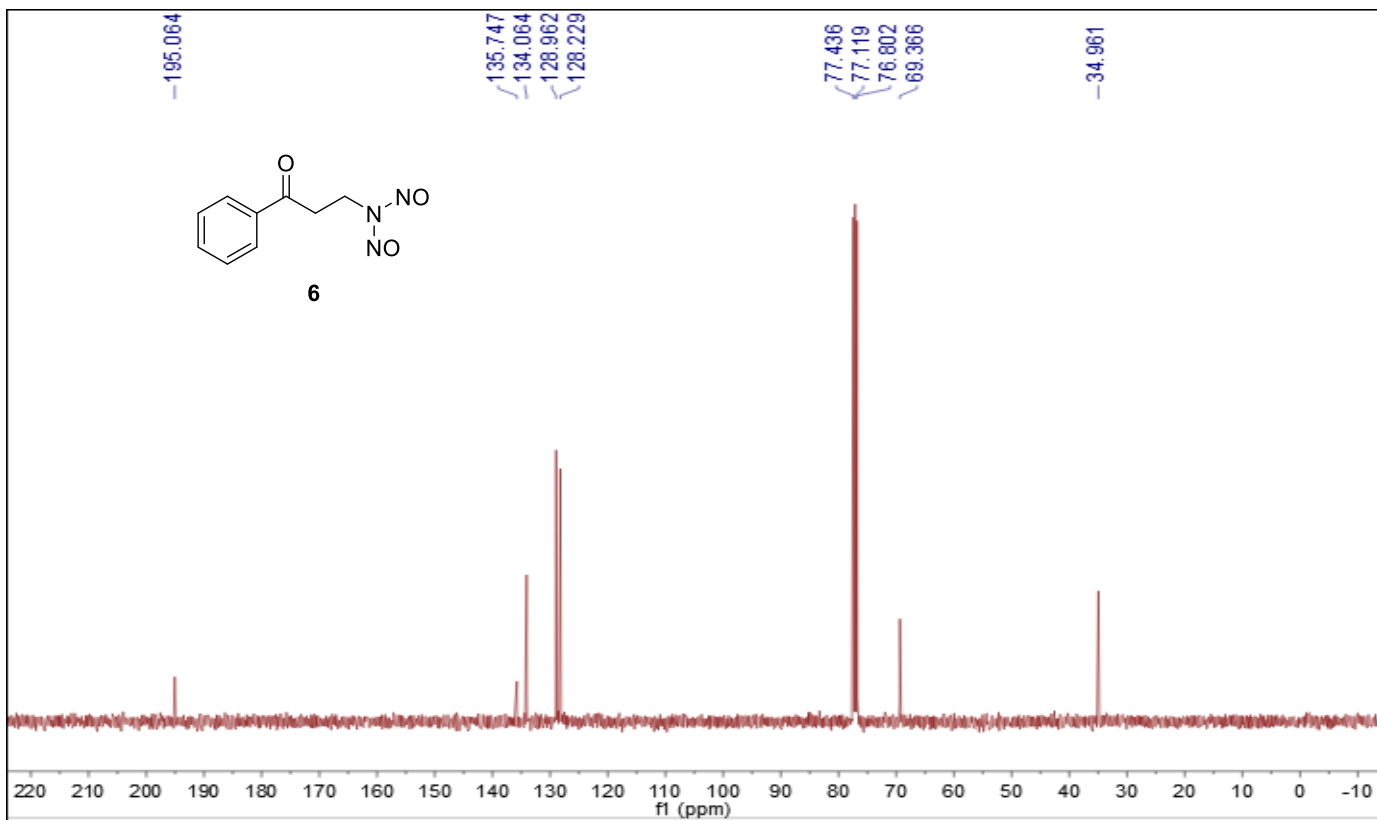

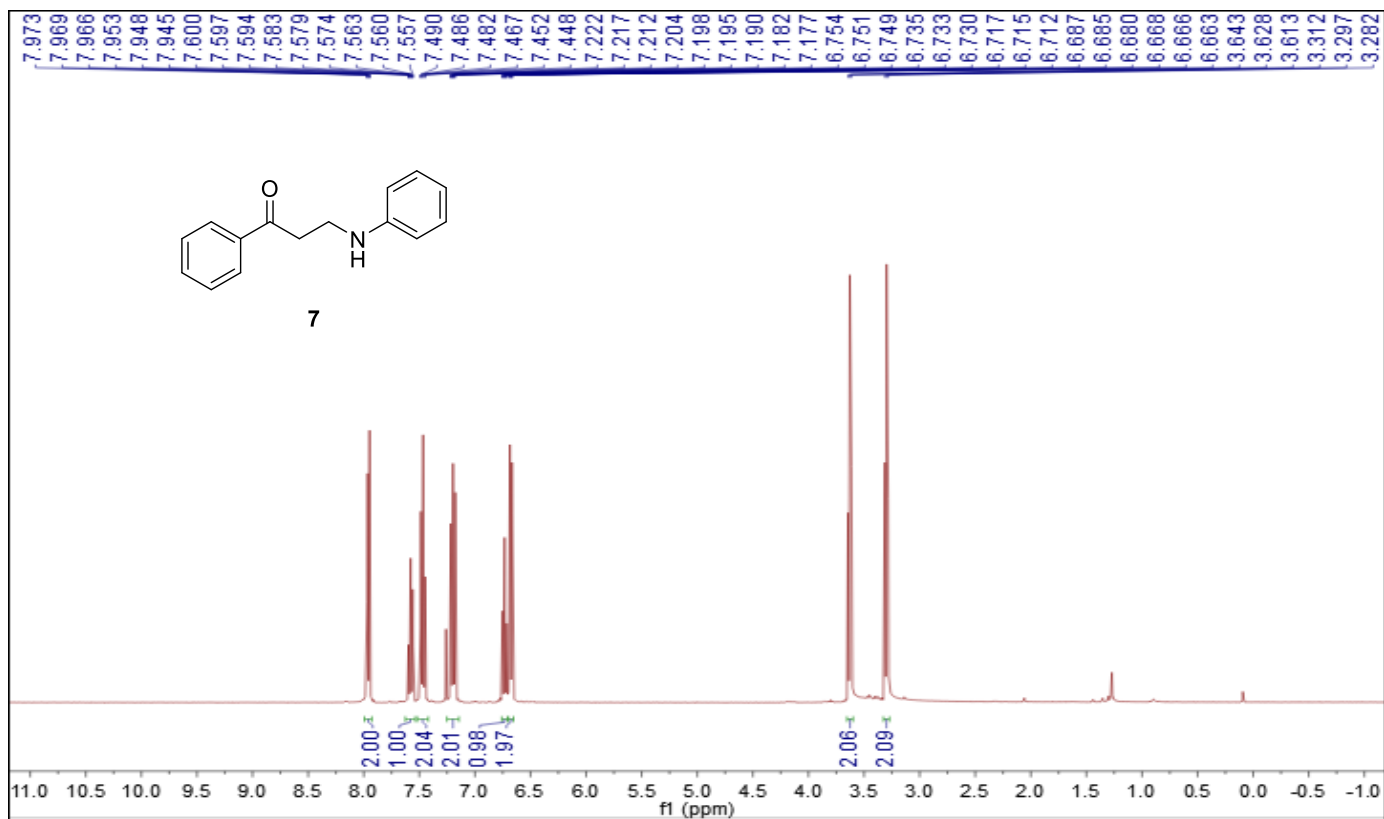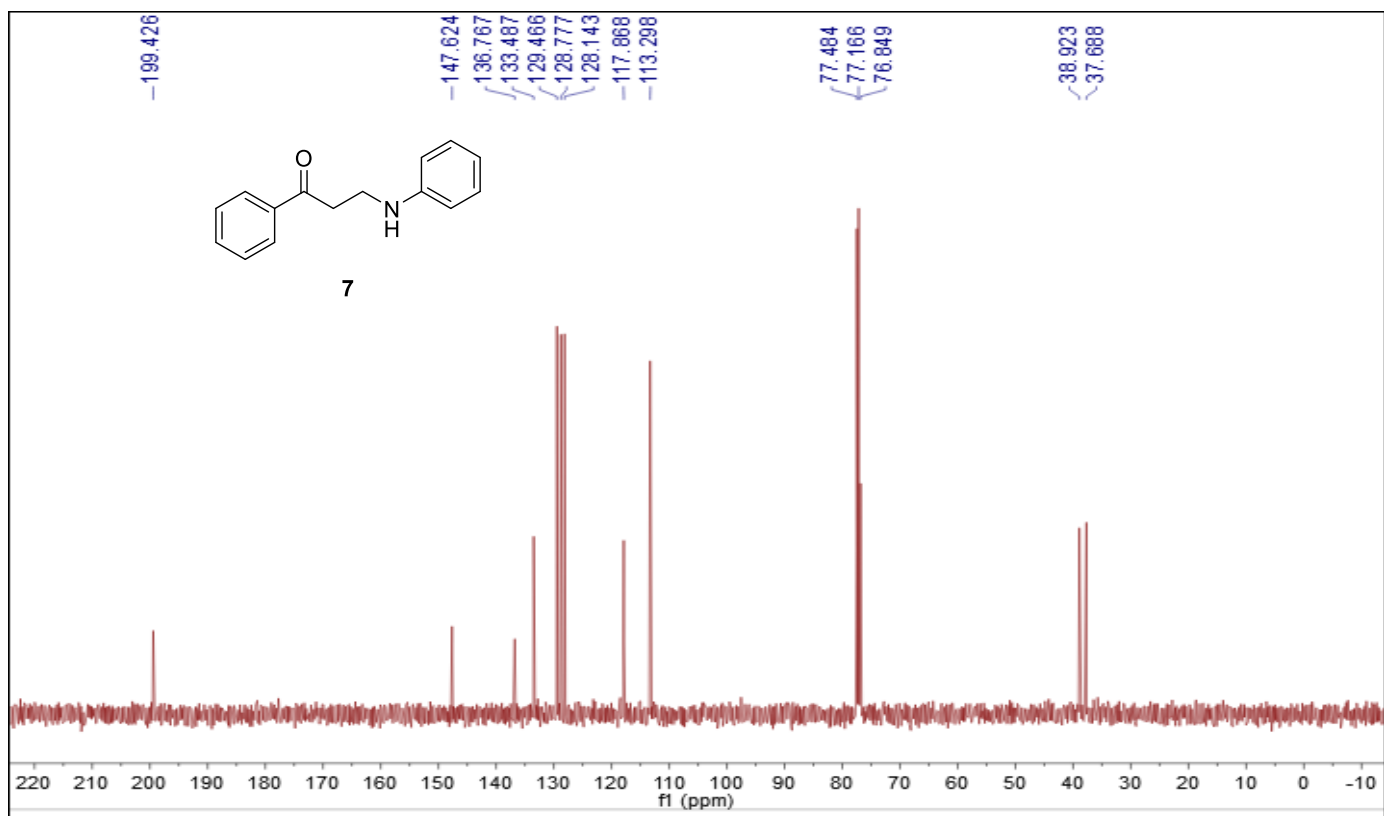



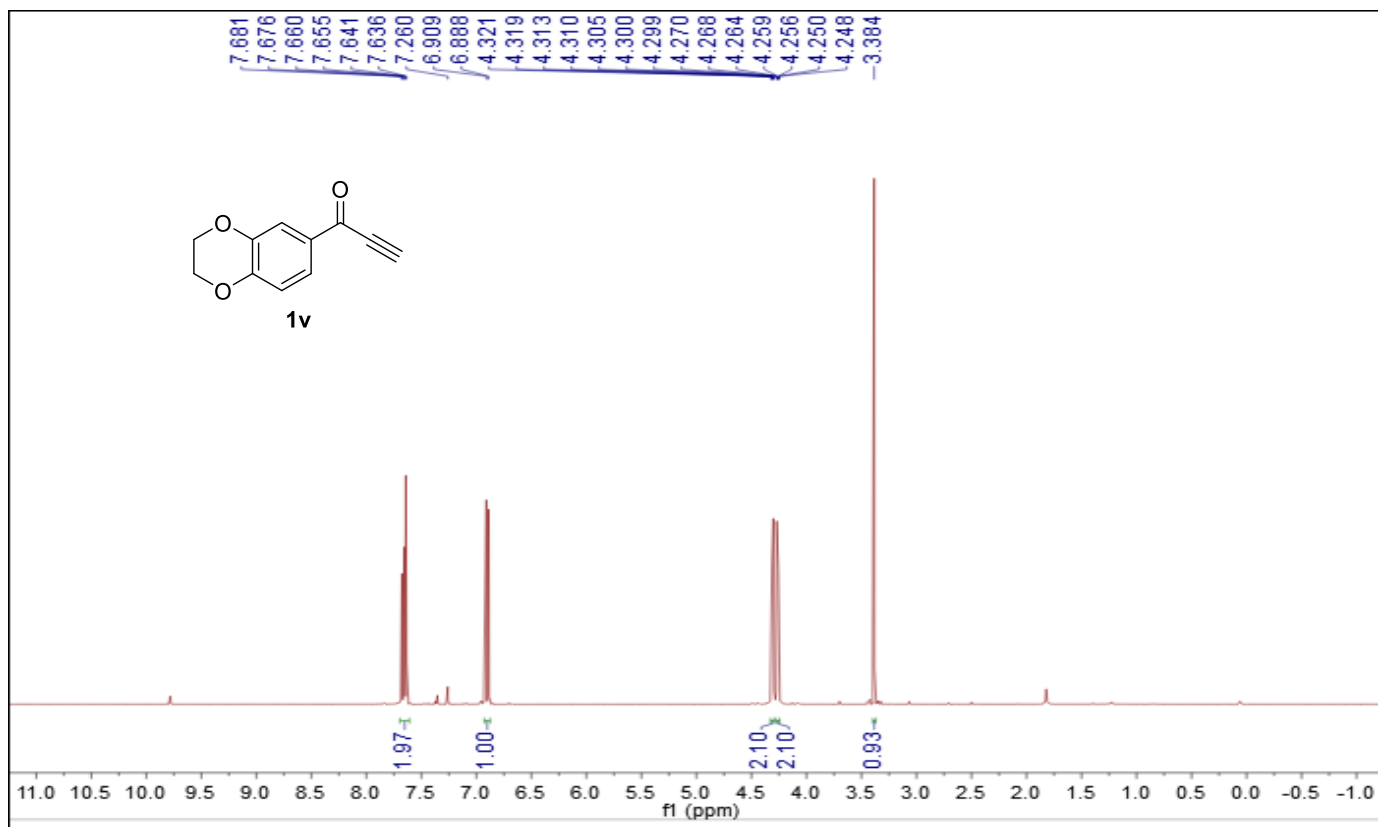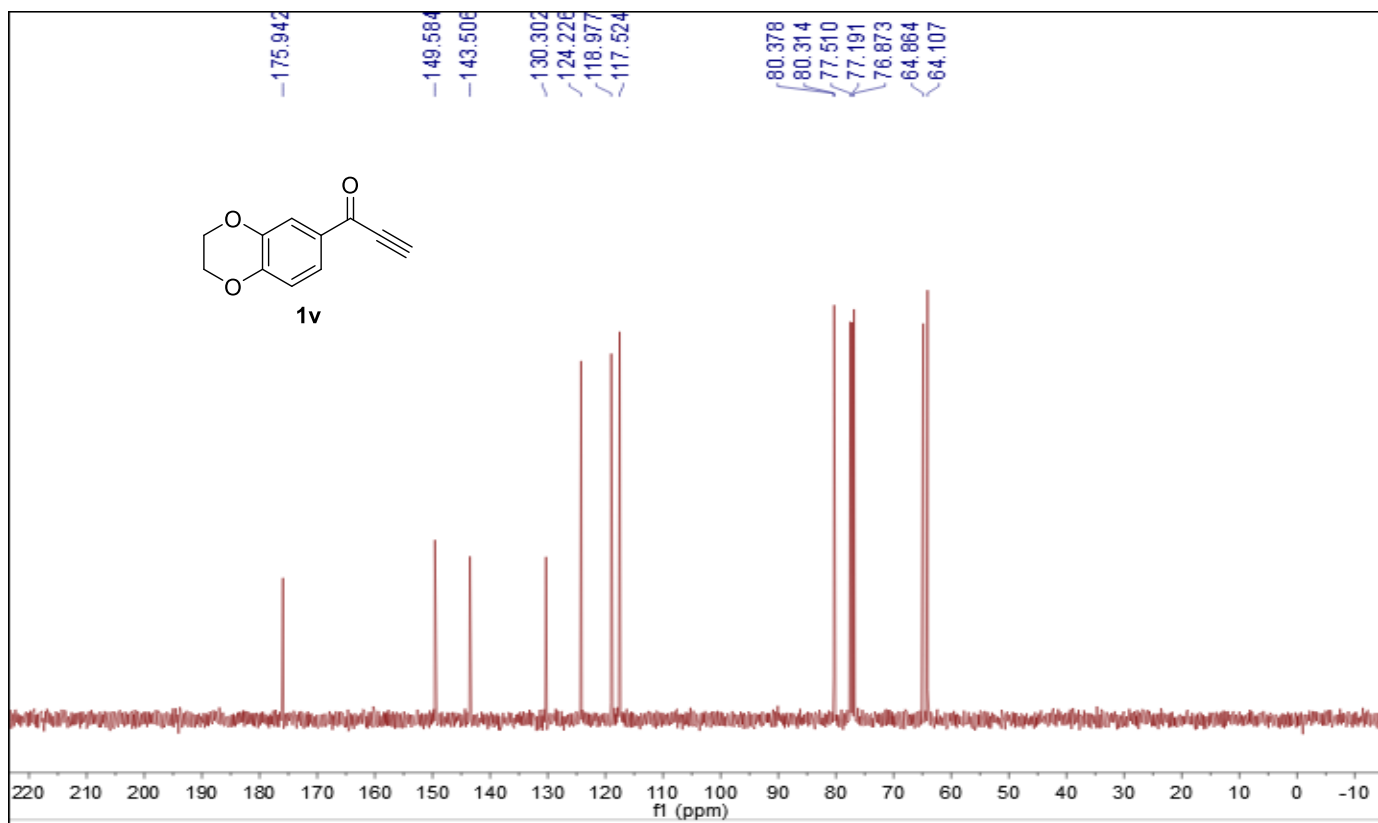

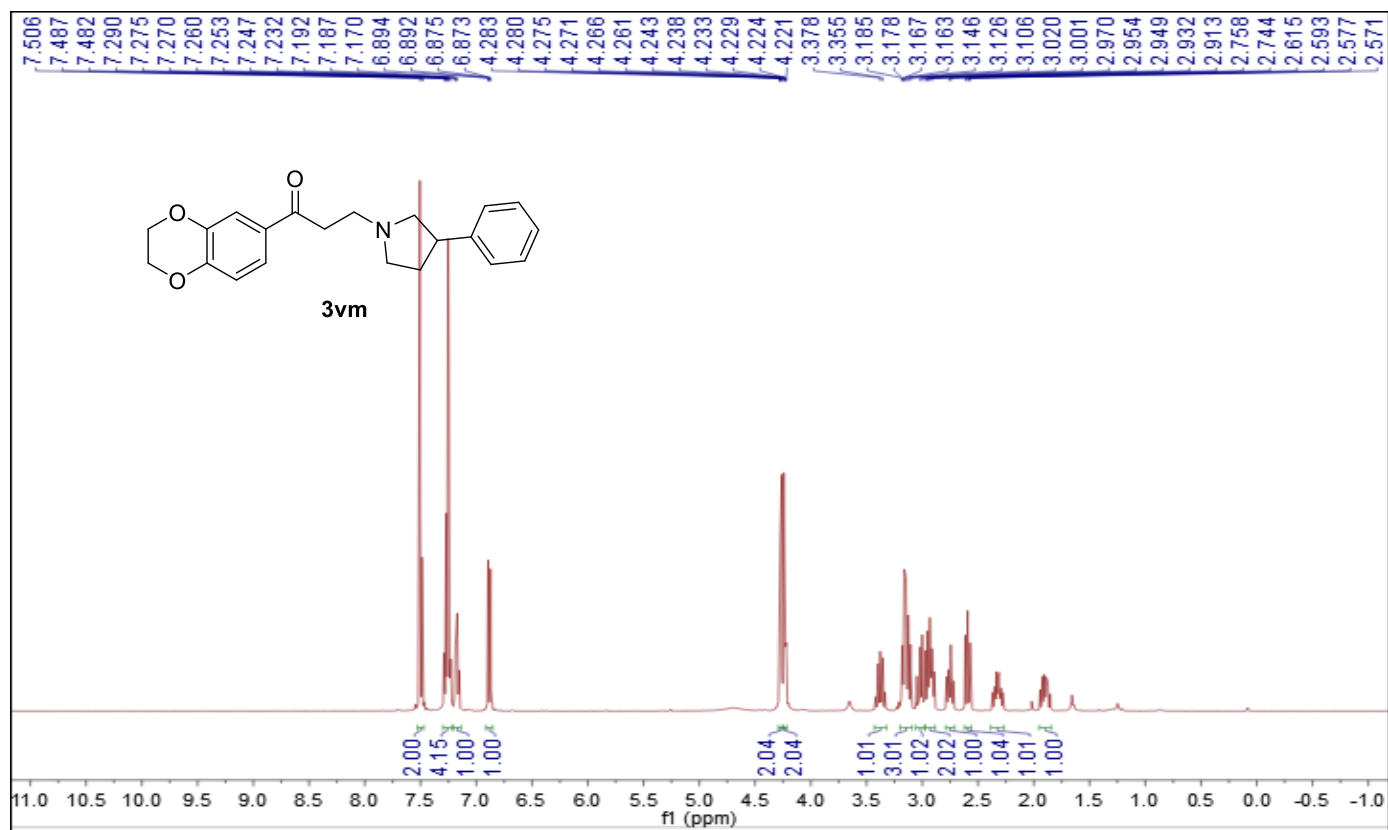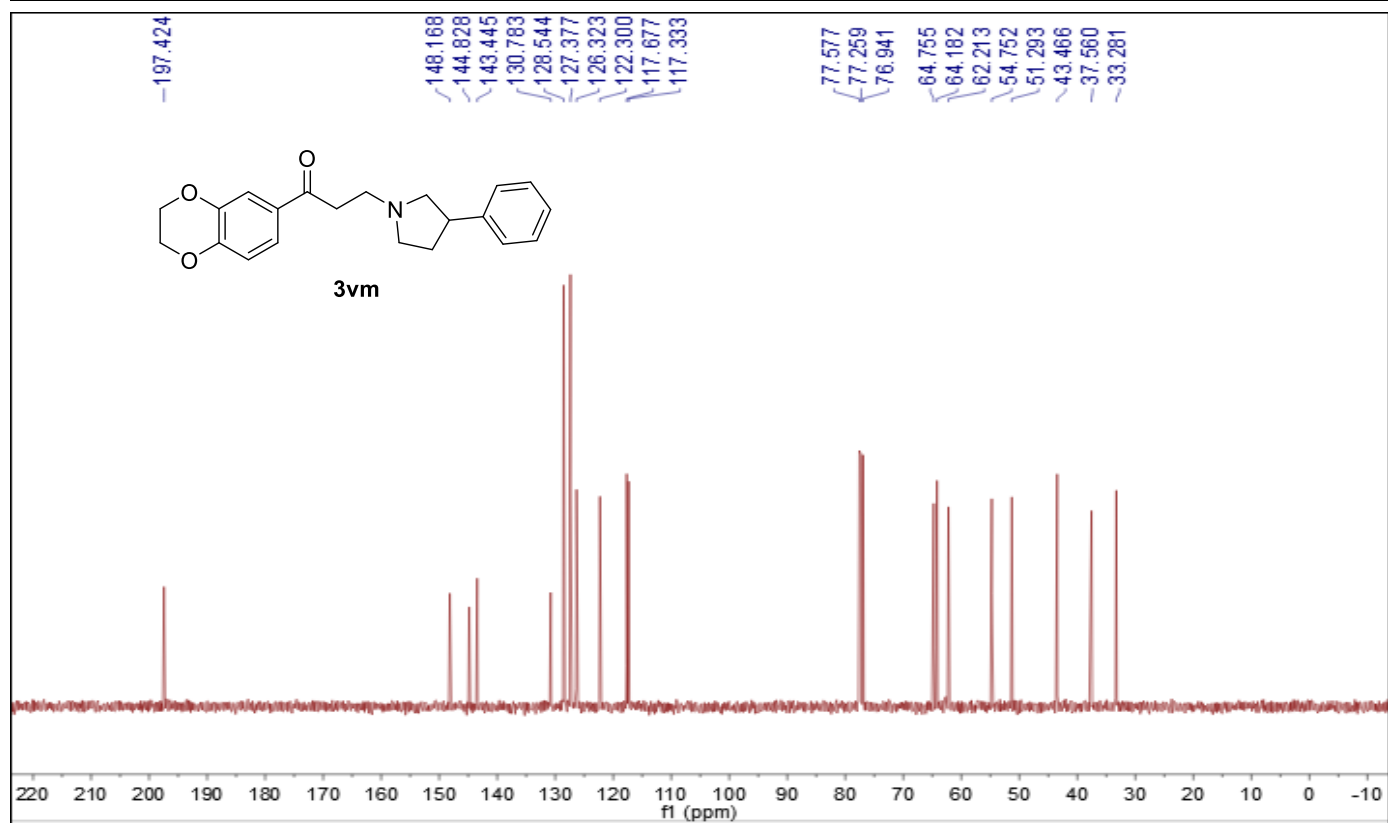

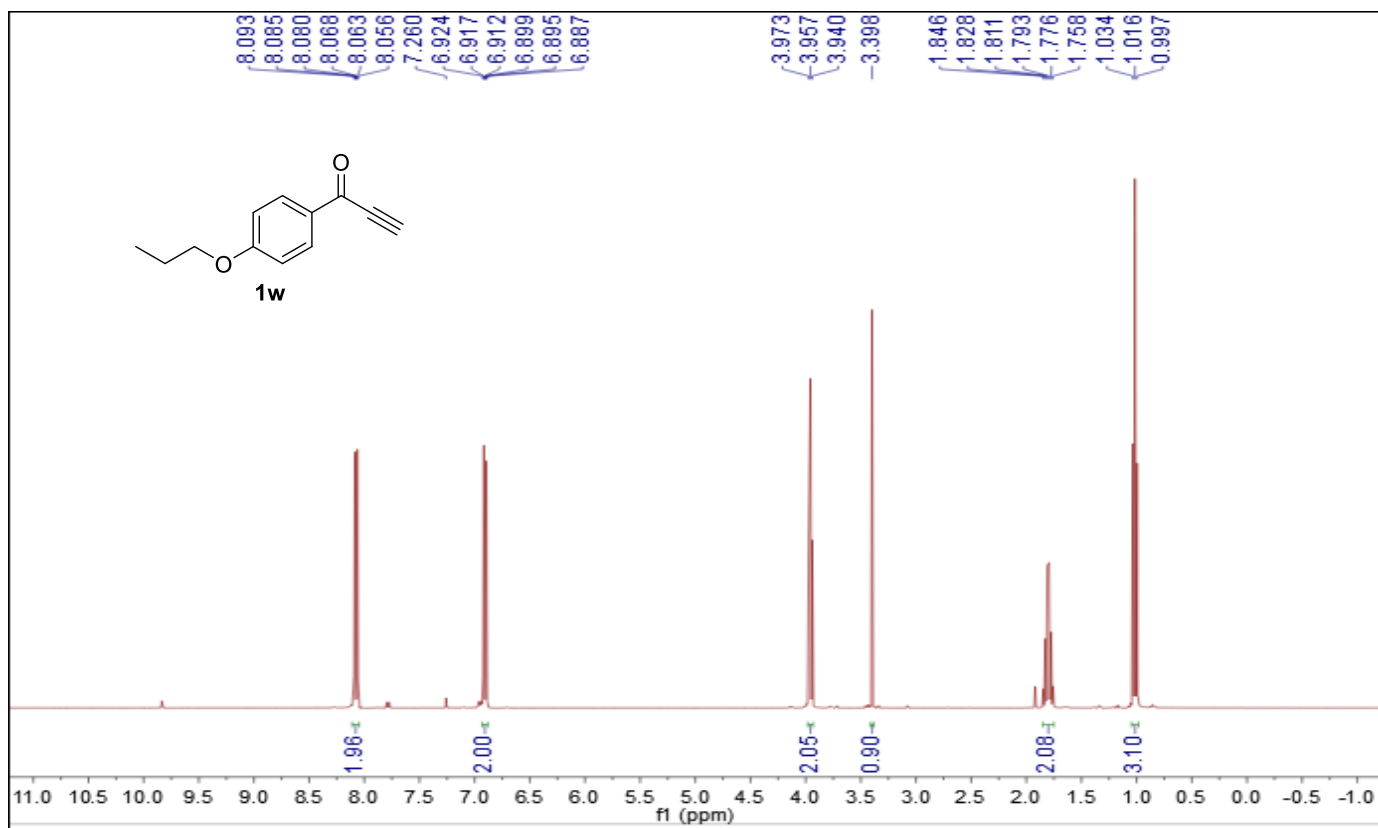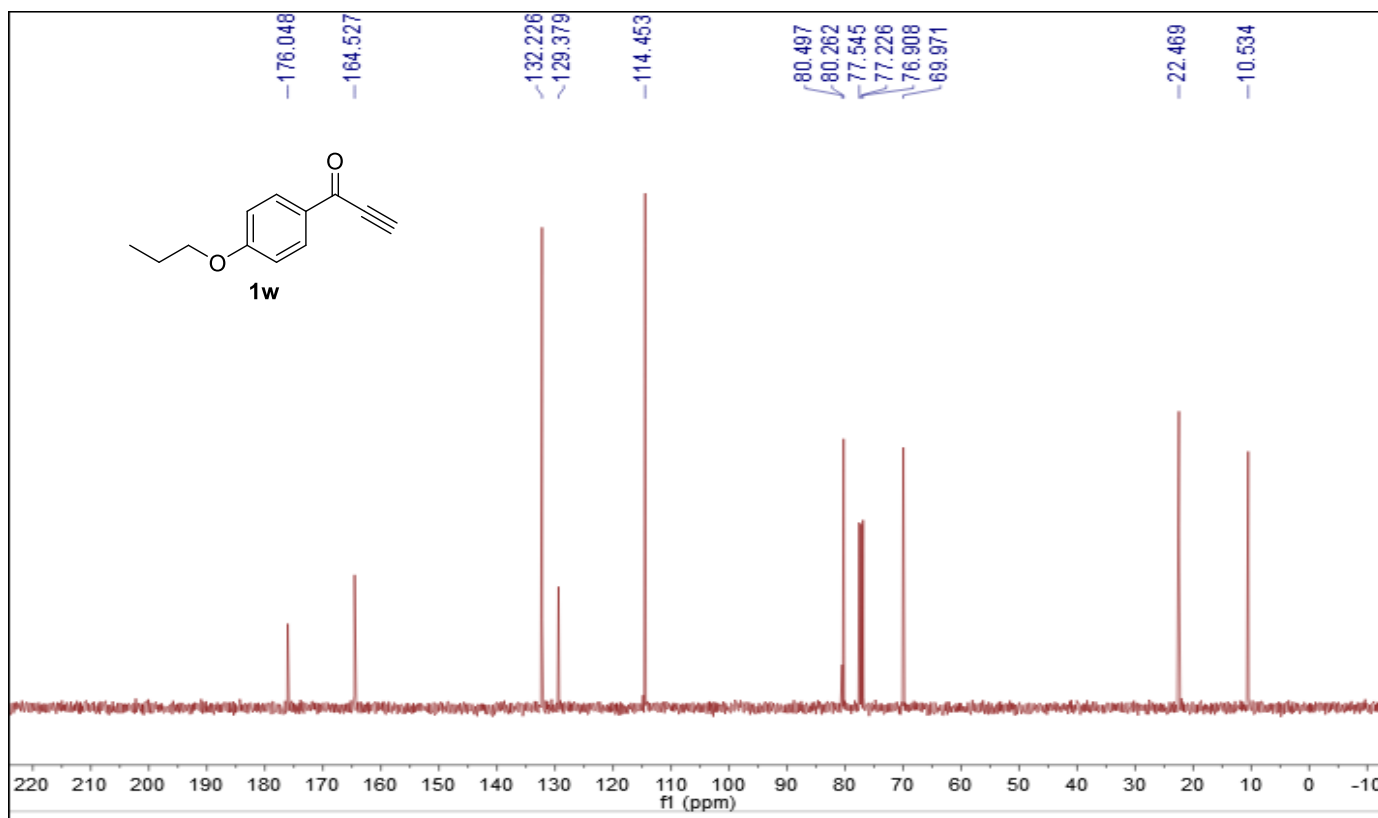

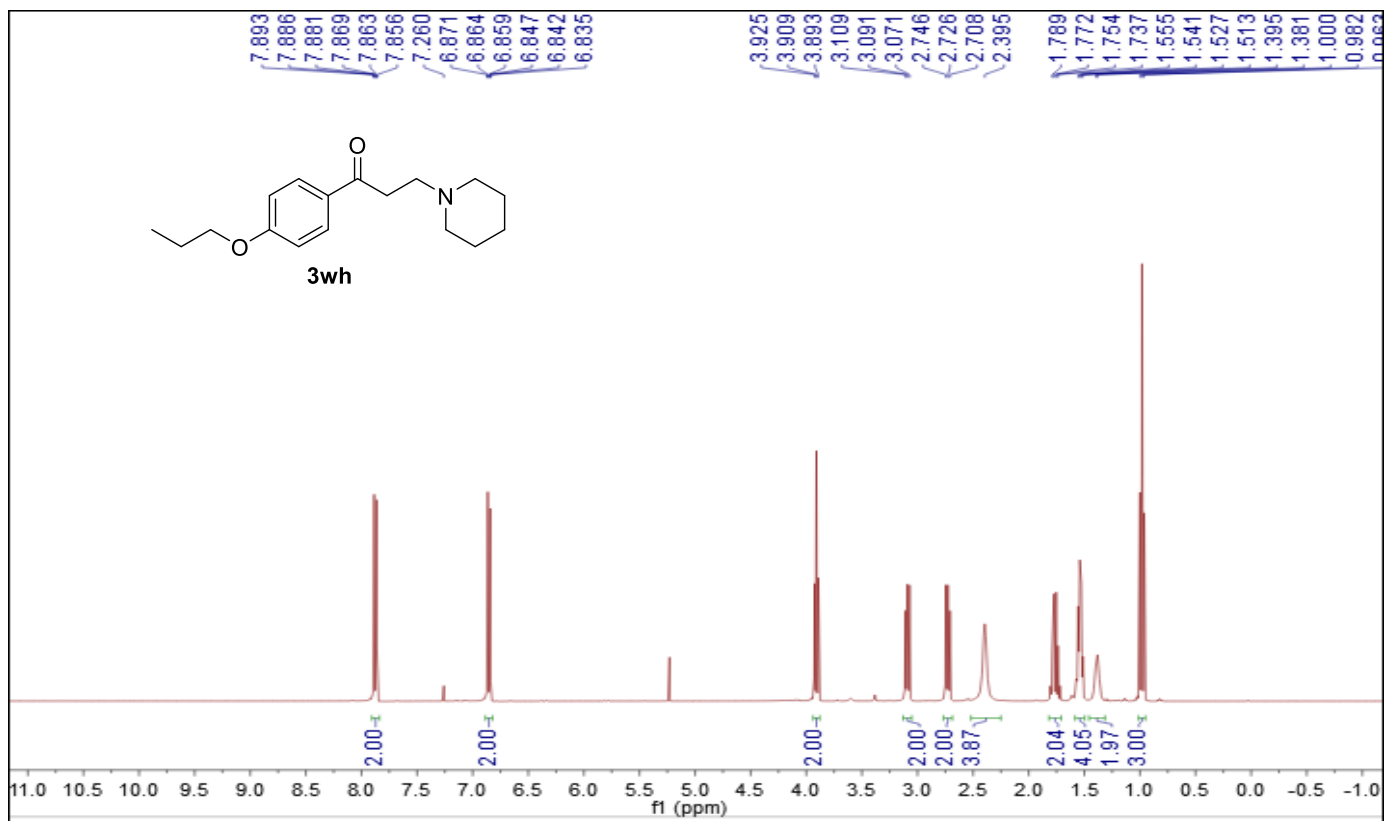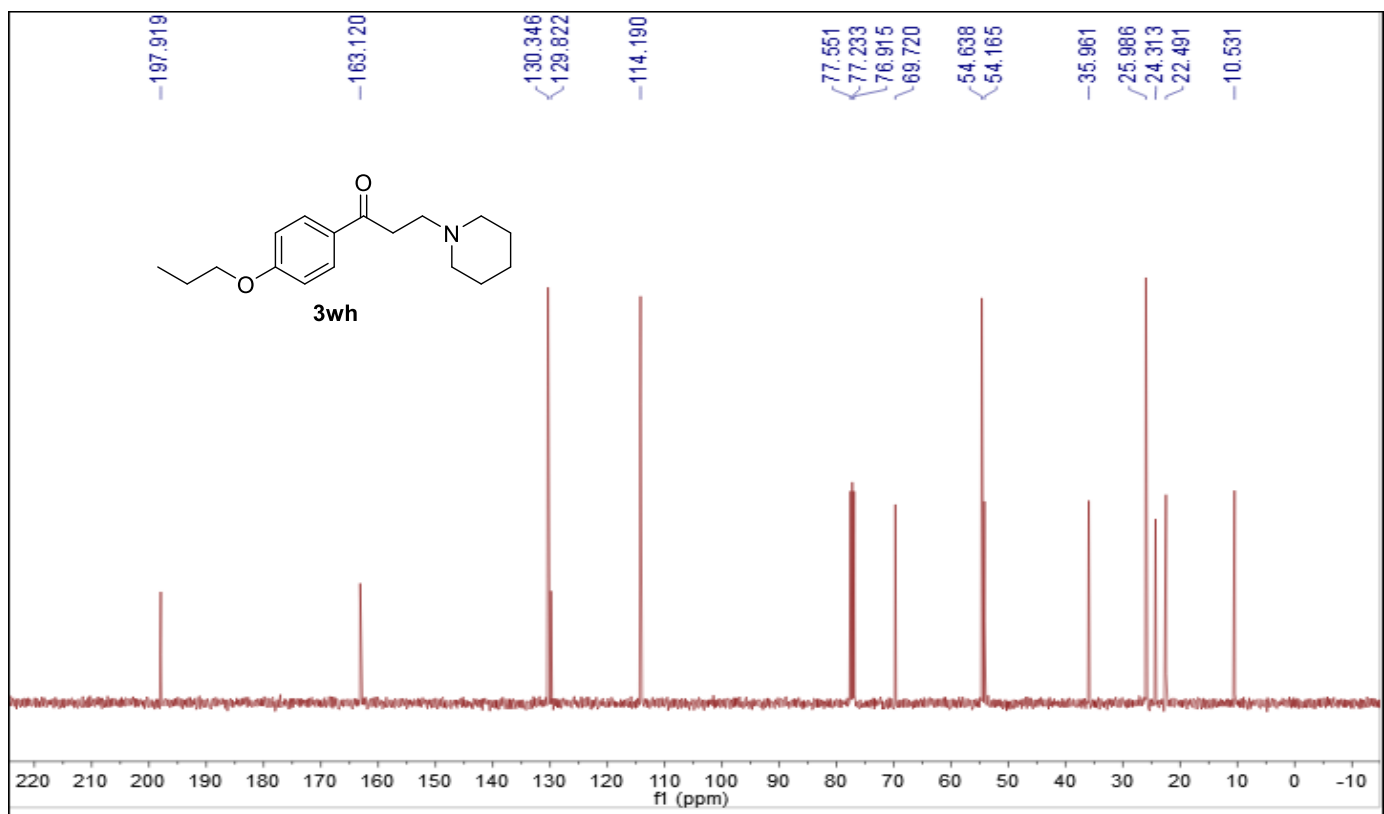

Supplement: d2cc00169a1.pdf [file d2cc00169a1.pdf]
